# Supplementary material for: Proteomic variations after short-term heat shock treatment reveal differentially expressed proteins involved in early microspore embryogenesis in cabbage (Brassica oleracea)
Source: PeerJ. 2020 Apr 8;8:e8897. doi: 10.7717/peerj.8897 (PMC7169393; doi:10.7717/peerj.8897)
Supplement: Table S1 [file peerj-08-8897-s001.xlsx]

## Sheet: Sheet1
20 kDa chaperonin(CPN20)	Bo2g023100-F1	GACTACCAAAGAGAAGCCTTCT
	Bo2g023100-R1	GAACTGTGCTTCCAGTTGAAAT
Malate dehydrogenase (mMDH)	Bo6g031300.F1	CTTCATCTCCTTCATCGCTTTG
	Bo6g031300.R1	AGAATGTTGTTCATTGTCGCTC
SGT1 homolog B(SGT1)	Bo3g045210.F1	TCAAGCTCTACAACACCACTAG
	Bo3g045210.R1	ACTCGTGTCTGAACATAGGTTT
heat shock 70 kDa protein 5	Bo5g021500.F1	TGTTGATTTCTACGCGACGATA
	Bo5g021500.R1	CTCAGAACTTTCTCCACAGGAT
heat stress transcription factor B-4b-like	Bo2g165560-F1	TGATGATCCTTCCACGGATAAG
	Bo2g165560-R1	GAAGTCATCGCATACAAACTCC
heat shock 70 kDa protein 5	Bo8g066630-F1	TGTTCTGATCCAAGTGTACGAA
	Bo8g066630-R1	GCGTCTATGTCAAAACACACAT
HSP21 description	Bo1g050780-F1	AGAACAGAAGAAGGAAGACGAG
	Bo1g050780-R1	TTTGATCTTGTCCTTTTCGCAG
Cell division control protein 48 homolog A （CDC48)	Bo5g138000-F1	AGAGAAGTTTGAGAAGTTCGGT
	Bo5g138000-R1	CAAAGAAGAGAACACATGGAGC
Protein SCO1 homolog 1, mitochondrial (HCC)	Bo5g139630-F1	TCTTCTTCGCTTTTAAAGACGG
	Bo5g139630-R1	CTCCACAACCTCCGAATAACTC
