# Supplementary material for: Proteomic variations after short-term heat shock treatment reveal differentially expressed proteins involved in early microspore embryogenesis in cabbage (Brassica oleracea)
Source: PeerJ. 2020 Apr 8;8:e8897. doi: 10.7717/peerj.8897 (PMC7169393; doi:10.7717/peerj.8897)
Supplement: Table S2 [file peerj-08-8897-s002.xlsx]

## Sheet: all.protein.norm.integrate
Accession	Description	information	Coverage	# Peptides	# PSMs	# Unique Peptides	# Protein Groups	# AAs	MW [kDa]	calc. pI	Found in Sample: [S12] F12: Sample	Found in Sample: [S11] F11: Sample	Found in Sample: [S10] F10: Sample	Found in Sample: [S9] F9: Sample	Found in Sample: [S8] F8: Sample	Found in Sample: [S7] F7: Sample	Found in Sample: [S6] F6: Sample	Found in Sample: [S5] F5: Sample	Found in Sample: [S4] F4: Sample	Found in Sample: [S3] F3: Sample	Found in Sample: [S2] F2: Sample	Found in Sample: [S1] F1: Sample	emPAI	Score Sequest HT	# Peptides Sequest HT	A1_1	A1_2	A1_3	A2_1	A2_2	A2_3	B1_1	B1_2	B1_3	B2_1	B2_2	B2_3	Group_A1.average	Group_A1.call.percent	Group_A2.average	Group_A2.call.percent	Group_B1.average	Group_B1.call.percent	Group_B2.average	Group_B2.call.percent	Group_A1.vs.Group_A2.FC	pvalue	Group_B1.vs.Group_B2.FC	pvalue
Bo3g154170.1	Purple acid phosphatase	pep chromosome:v2.1:C3:55320820:55322716:1 gene:Bo3g154170 transcript:Bo3g154170.1 gene_biotype:protein_coding transcript_biotype:protein_coding description:Purple acid phosphatase :UniProtKB/TrEMBL;Acc:A0A0D3BK13]	55.5076	20	3382	18	1	463	52.8	7.23	High	High	High	High	High	High	High	High	High	High	High	High	37.566	10356.6	20	9.38056e+09	9.63741e+09	8.8776e+09	6.80126e+09	6.36435e+09	6.34057e+09	5.95058e+09	5.98161e+09	5943786165	7.42926e+09	7.36344e+09	7.3084e+09	9.29853e+09	1	6.50206e+09	1	5.95866e+09	1	7.36703e+09	1	1.43009	0.000481654	0.808827	2.79145e-06
Bo5g008630.1	Elongation factor 1-alpha	pep chromosome:v2.1:C5:2974391:2976291:1 gene:Bo5g008630 transcript:Bo5g008630.1 gene_biotype:protein_coding transcript_biotype:protein_coding description:Elongation factor 1-alpha :UniProtKB/TrEMBL;Acc:A0A0D3C8E5]	70.2128	30	3338	30	1	470	51.9	9.16	High	High	High	High	High	High	High	High	High	High	High	High	28.936	9509.98	30	1.74612e+10	1.86964e+10	1.60663e+10	1.9409e+10	1.86468e+10	2.18783e+10	1.89333e+10	1.85858e+10	18057567610	1.78156e+10	1.85092e+10	1.75279e+10	1.74079e+10	1	1.9978e+10	1	1.85256e+10	1	1.79509e+10	1	0.871354	0.106149	1.03202	0.211564
Bo7g117890.1		pep chromosome:v2.1:C7:47210079:47211556:-1 gene:Bo7g117890 transcript:Bo7g117890.1 gene_biotype:protein_coding transcript_biotype:protein_coding	51.6667	13	2882	9	1	360	41.4	6.42	High	High	High	High	High	High	High	High	High	High	High	High	15.496	8403.25	13	5.85869e+09	6.32916e+09	6.13539e+09	4.01971e+09	4.06869e+09	4.23718e+09	2.97031e+09	3.04901e+09	2968687200	2.97316e+09	3.05618e+09	3.15337e+09	6.10775e+09	1	4.10853e+09	1	2.996e+09	1	3.0609e+09	1	1.4866	0.000190875	0.978796	0.328957
Bo3g021230.1		pep chromosome:v2.1:C3:7090725:7093057:1 gene:Bo3g021230 transcript:Bo3g021230.1 gene_biotype:protein_coding transcript_biotype:protein_coding	51.9313	49	2810	8	1	699	80	5.08	High	High	High	High	High	High	High	High	High	High	High	High	28.359	7421.38	49	1.53815e+09	1.61771e+09	1.58001e+09	1.77455e+09	1.7084e+09	1.68718e+09	1.987e+09	1.99235e+09	2027263191	1.82625e+09	1.72312e+09	1.64955e+09	1.57863e+09	1	1.72338e+09	1	2.00221e+09	1	1.73297e+09	1	0.916007	0.0143292	1.15536	0.00697598
Bo3g020890.1		pep chromosome:v2.1:C3:6903714:6906153:-1 gene:Bo3g020890 transcript:Bo3g020890.1 gene_biotype:protein_coding transcript_biotype:protein_coding	53.2189	49	2675	2	1	699	80	5.06	High	High	High	High	High	High	High	High	High	High	High	High	27.775	6984.2	49	2.33622e+08	1.24082e+08	1.76212e+08	2.15548e+08	2.14383e+08	2.66053e+08	2.04362e+08	1.63566e+08	2.21503e+08	3.08869e+08	2.50642e+08	2.25769e+08	1.77972e+08	1	2.31994e+08	1	1.96477e+08	1	2.6176e+08	1	0.767139	0.207106	0.7506	0.095369
Bo1g101350.1		pep chromosome:v2.1:C1:30071592:30073213:-1 gene:Bo1g101350 transcript:Bo1g101350.1 gene_biotype:protein_coding transcript_biotype:protein_coding	40.6709	15	2519	10	1	477	52.4	7.93	High	High	High	High	High	High	High	High	High	High	High	High	26.213	6739.51	15	2.31215e+10	2.57085e+10	2.3517e+10	1.67588e+10	1.67912e+10	1.52843e+10	1.99865e+10	1.86548e+10	17685459652	1.48069e+10	1.72489e+10	1.61328e+10	2.41157e+10	1	1.62781e+10	1	1.87756e+10	1	1.60628e+10	1	1.48148	0.00115719	1.16888	0.0491384
Bo8g036790.1		pep chromosome:v2.1:C8:12969828:12971498:-1 gene:Bo8g036790 transcript:Bo8g036790.1 gene_biotype:protein_coding transcript_biotype:protein_coding	42.38	17	2514	10	1	479	53.5	8.73	High	High	High	High	High	High	High	High	High	High	High	High	10.602	6553.19	17	2.35597e+10	2.40481e+10	2.33355e+10	1.95649e+10	2.09891e+10	1.98421e+10	2.5116e+10	2.77055e+10	27355505429	2.42176e+10	2.43814e+10	2.46339e+10	2.36477e+10	1	2.0132e+10	1	2.67257e+10	1	2.4411e+10	1	1.17463	0.00190826	1.09482	0.0477106
Bo7g039070.1		pep chromosome:v2.1:C7:14295887:14297521:-1 gene:Bo7g039070 transcript:Bo7g039070.1 gene_biotype:protein_coding transcript_biotype:protein_coding	36.4017	15	2458	11	1	478	52.5	6.54	High	High	High	High	High	High	High	High	High	High	High	High	15.156	6207.82	15	1.08745e+10	1.11991e+10	1.06301e+10	1.0415e+10	9.91177e+09	9.88048e+09	1.13714e+10	1.1224e+10	11357788121	6.17465e+09	5.97836e+09	6.11529e+09	1.09012e+10	1	1.00691e+10	1	1.13177e+10	1	6.08943e+09	1	1.08264	0.0253395	1.85859	2.50616e-07
Bo9g183560.1		pep chromosome:v2.1:C9:54268699:54270943:1 gene:Bo9g183560 transcript:Bo9g183560.1 gene_biotype:protein_coding transcript_biotype:protein_coding	63.9319	45	2324	9	1	646	70.8	5.19	High	High	High	High	High	High	High	High	High	High	High	High	51.481	6054.67	45	1.96377e+09	1.65828e+09	1.957e+09	2.08103e+09	1.95013e+09	1.83058e+09	1.72702e+09	1.76562e+09	1751857464	1.3037e+09	1.43928e+09	1.52336e+09	1.85968e+09	1	1.95391e+09	1	1.74817e+09	1	1.42212e+09	1	0.951776	0.489631	1.22927	0.00739623
Bo3g081890.1		pep chromosome:v2.1:C3:30326287:30327904:1 gene:Bo3g081890 transcript:Bo3g081890.1 gene_biotype:protein_coding transcript_biotype:protein_coding	41.875	16	2592	10	1	480	52.6	7.37	High	High	High	High	High	High	High	High	High	High	High	High	23.621	5946.03	16	2.77191e+10	2.86797e+10	2.70863e+10	3.06906e+10	3.11497e+10	3.03396e+10	2.56523e+10	2.83087e+10	28548834062	2.81021e+10	2.94377e+10	2.84901e+10	2.78284e+10	1	3.07266e+10	1	2.75033e+10	1	2.86766e+10	1	0.905678	0.00505071	0.959083	0.309649
Bo7g011560.1	Purple acid phosphatase	pep chromosome:v2.1:C7:4025773:4027897:1 gene:Bo7g011560 transcript:Bo7g011560.1 gene_biotype:protein_coding transcript_biotype:protein_coding description:Purple acid phosphatase :UniProtKB/TrEMBL;Acc:A0A0D3D354]	73.4205	24	1868	11	1	459	52.1	6.3	High	High	High	High	High	High	High	High	High	High	High	High	34.938	5772.55	24	3.1432e+09	3.27445e+09	3.13341e+09	2.17792e+09	2.11007e+09	2.11722e+09	1.71183e+09	1.61205e+09	1627502755	1.57292e+09	1.67291e+09	1.60574e+09	3.18369e+09	1	2.13507e+09	1	1.65046e+09	1	1.61719e+09	1	1.49114	3.13022e-05	1.02057	0.479851
Bo9g026220.1	Purple acid phosphatase	pep chromosome:v2.1:C9:8408262:8410180:1 gene:Bo9g026220 transcript:Bo9g026220.1 gene_biotype:protein_coding transcript_biotype:protein_coding description:Purple acid phosphatase :UniProtKB/TrEMBL;Acc:A0A0D3E3C5]	66.167	22	1809	9	1	467	52.8	5.91	High	High	High	High	High	High	High	High	High	High	High	High	34.938	5669.24	22	2.67338e+09	2.77526e+09	2.76014e+09	1.76811e+09	1.66478e+09	1.64225e+09	1.60052e+09	1.6829e+09	1749482290	1.71872e+09	1.67949e+09	1.71641e+09	2.73626e+09	1	1.69171e+09	1	1.67763e+09	1	1.70488e+09	1	1.61745	3.12441e-05	0.984021	0.576925
Bo3g091720.1		pep chromosome:v2.1:C3:33422043:33424305:1 gene:Bo3g091720 transcript:Bo3g091720.1 gene_biotype:protein_coding transcript_biotype:protein_coding	57.91	40	2217	3	1	689	75.5	5.35	High	High	High	High	High	High	High	High	High	High	High	High	27.368	5633.13	40	3.18792e+08	3.26065e+08	2.06317e+08	3.71669e+08	3.59317e+08	2.47861e+08	3.31615e+08	3.43565e+08	2.29347e+08	1.85088e+08	2.53201e+08	2.44651e+08	2.83725e+08	1	3.26282e+08	1	3.01509e+08	1	2.27647e+08	1	0.869568	0.484109	1.32446	0.154235
Bo2g037660.1		pep chromosome:v2.1:C2:10351303:10353501:-1 gene:Bo2g037660 transcript:Bo2g037660.1 gene_biotype:protein_coding transcript_biotype:protein_coding	50	45	2261	11	1	696	79.7	5.05	High	High	High	High	High	High	High	High	High	High	High	High	19.991	5482.19	45	9.77238e+08	1.065e+09	1.10379e+09	1.2274e+09	1.2741e+09	1.1903e+09	1.27007e+09	1.22271e+09	1262962800	1.06651e+09	1.06707e+09	1.03549e+09	1.04868e+09	1	1.2306e+09	1	1.25191e+09	1	1.05636e+09	1	0.852166	0.0151087	1.18512	0.000413135
Bo6g076500.1		pep chromosome:v2.1:C6:22403000:22404226:-1 gene:Bo6g076500 transcript:Bo6g076500.1 gene_biotype:protein_coding transcript_biotype:protein_coding	54.1667	19	1640	13	1	408	45.1	7.44	High	High	High	High	High	High	High	High	High	High	High	High	26.826	5109.42	19	7.36745e+09	7.80538e+09	8.14871e+09	5.66157e+09	5.80464e+09	6.26553e+09	8.92514e+09	9.67792e+09	10884729219	1.07816e+10	1.15304e+10	1.20717e+10	7.77385e+09	1	5.91058e+09	1	9.82926e+09	1	1.14612e+10	1	1.31524	0.00303135	0.857613	0.0750387
Bo5g042670.1		pep chromosome:v2.1:C5:13909382:13910816:-1 gene:Bo5g042670 transcript:Bo5g042670.1 gene_biotype:protein_coding transcript_biotype:protein_coding	63.9687	26	1825	1	1	383	42.1	6.6	Not Found	Not Found	High	Not Found	High	High	Not Found	Not Found	Not Found	High	High	High	62.096	4507.86	26	NA	NA	1.72984e+07	NA	1.29959e+07	1.13802e+07	NA	NA	NA	1.42117e+07	1.71977e+07	1.63301e+07	1.72984e+07	0.333333	1.21881e+07	0.666667	NA	0	1.59132e+07	1	1.41929	NA	NA	NA
Bo6g056160.1		pep chromosome:v2.1:C6:14989145:14991682:1 gene:Bo6g056160 transcript:Bo6g056160.1 gene_biotype:protein_coding transcript_biotype:protein_coding	55.1148	18	1745	12	1	479	53.4	8.81	High	High	High	High	High	High	High	High	High	High	High	High	16.433	4449.59	18	1.82288e+10	1.65527e+10	1.70794e+10	1.46683e+10	1.45094e+10	1.41717e+10	1.91481e+10	1.85585e+10	18452053190	1.64817e+10	1.51935e+10	1.50725e+10	1.7287e+10	1	1.44498e+10	1	1.87196e+10	1	1.55826e+10	1	1.19635	0.00533671	1.20132	0.00329885
Bo3g005090.1	ATP synthase subunit beta	pep chromosome:v2.1:C3:1944237:1946703:1 gene:Bo3g005090 transcript:Bo3g005090.1 gene_biotype:protein_coding transcript_biotype:protein_coding description:ATP synthase subunit beta :UniProtKB/TrEMBL;Acc:A0A0D3B0C4]	67.6259	29	1452	29	1	556	59.8	6.71	High	High	High	High	High	High	High	High	High	High	High	High	17.002	4251.39	29	3.93754e+09	3.6813e+09	3.75766e+09	4.11742e+09	3.89378e+09	3.81239e+09	4.09041e+09	3.95132e+09	4027729379	4.00303e+09	4.044e+09	3.80031e+09	3.79217e+09	1	3.9412e+09	1	4.02315e+09	1	3.94912e+09	1	0.962186	0.277548	1.01875	0.434892
Bo4g127330.1		pep chromosome:v2.1:C4:33180913:33182562:1 gene:Bo4g127330 transcript:Bo4g127330.1 gene_biotype:protein_coding transcript_biotype:protein_coding	53.9583	20	1528	14	1	480	53.6	8.09	High	High	High	High	High	High	High	High	High	High	High	High	13.678	4216.6	20	1.37954e+10	1.33865e+10	1.33698e+10	1.85469e+10	1.73706e+10	1.82347e+10	1.61395e+10	1.57455e+10	16225926164	1.3452e+10	1.37688e+10	1.34935e+10	1.35173e+10	1	1.80507e+10	1	1.6037e+10	1	1.35714e+10	1	0.748849	0.000277998	1.18167	0.00015803
Bo7g033050.1		pep chromosome:v2.1:C7:12880151:12882526:-1 gene:Bo7g033050 transcript:Bo7g033050.1 gene_biotype:protein_coding transcript_biotype:protein_coding	60.3293	45	1605	9	1	668	73.6	5.21	High	High	High	High	High	High	High	High	High	High	High	High	19.188	4106.9	45	8.99425e+08	9.6291e+08	8.95475e+08	1.02464e+09	1.00195e+09	9.6071e+08	8.63676e+08	8.22148e+08	8.63181e+08	8.38462e+08	8.74464e+08	8.55568e+08	9.1927e+08	1	9.95766e+08	1	8.49668e+08	1	8.56165e+08	1	0.923178	0.0564416	0.992412	0.725552
Bo3g057250.1	Glyceraldehyde-3-phosphate dehydrogenase	pep chromosome:v2.1:C3:22317201:22319223:1 gene:Bo3g057250 transcript:Bo3g057250.1 gene_biotype:protein_coding transcript_biotype:protein_coding description:Glyceraldehyde-3-phosphate dehydrogenase :UniProtKB/TrEMBL;Acc:A0A0D3B9L0]	76.3314	23	1585	6	1	338	36.7	7.12	High	High	High	High	High	High	High	High	High	High	High	High	25.827	4068.78	23	7.02877e+08	6.47759e+08	7.36986e+08	8.92644e+08	9.93896e+08	9.22374e+08	6.17605e+08	6.46845e+08	6.26306e+08	5.282e+08	5.17085e+08	5.10042e+08	6.95874e+08	1	9.36304e+08	1	6.30252e+08	1	5.18442e+08	1	0.743213	0.00376292	1.21566	0.000386394
Bo5g017500.1	Glyceraldehyde-3-phosphate dehydrogenase	pep chromosome:v2.1:C5:5848345:5850139:-1 gene:Bo5g017500 transcript:Bo5g017500.1 gene_biotype:protein_coding transcript_biotype:protein_coding description:Glyceraldehyde-3-phosphate dehydrogenase :UniProtKB/TrEMBL;Acc:A0A0D3C9T6]	75.8112	22	1572	3	1	339	36.9	7.52	High	High	High	High	High	High	High	High	High	High	High	High	25.827	4054.2	22	9.70544e+08	9.20381e+08	9.89898e+08	1.28205e+09	1.26885e+09	1.28454e+09	7.57994e+08	7.58831e+08	7.74088e+08	7.68199e+08	7.49035e+08	7.18409e+08	9.60274e+08	1	1.27848e+09	1	7.63638e+08	1	7.45214e+08	1	0.751105	0.000116479	1.02472	0.298014
Bo2g156080.1		pep chromosome:v2.1:C2:48883154:48885879:1 gene:Bo2g156080 transcript:Bo2g156080.1 gene_biotype:protein_coding transcript_biotype:protein_coding	55.2788	49	1612	10	1	843	93.9	6.34	High	High	High	High	High	High	High	High	High	High	High	High	15.379	4013.13	49	1.88507e+09	1.96897e+09	2.05287e+09	2.11482e+09	2.24222e+09	2.2583e+09	2.21869e+09	2.15492e+09	2246991120	1.80332e+09	1.76596e+09	1.94627e+09	1.96897e+09	1	2.20511e+09	1	2.20687e+09	1	1.83851e+09	1	0.892911	0.0236391	1.20035	0.0038665
Bo3g024930.1		pep chromosome:v2.1:C3:9387798:9390521:-1 gene:Bo3g024930 transcript:Bo3g024930.1 gene_biotype:protein_coding transcript_biotype:protein_coding	58.1465	43	1534	9	1	669	73.6	5.21	High	High	High	High	High	High	High	High	High	High	High	High	17.874	3899.08	43	1.37896e+09	1.49814e+09	1.46715e+09	1.63277e+09	1.60847e+09	1.75496e+09	1.40924e+09	1.5013e+09	1419499546	1.41476e+09	1.30068e+09	1.33603e+09	1.44808e+09	1	1.6654e+09	1	1.44335e+09	1	1.35049e+09	1	0.869511	0.019664	1.06876	0.105534
Bo1g139130.1		pep chromosome:v2.1:C1:39785316:39787819:1 gene:Bo1g139130 transcript:Bo1g139130.1 gene_biotype:protein_coding transcript_biotype:protein_coding	60.4938	42	1369	4	1	648	71.1	5.25	High	High	High	High	High	High	High	High	High	High	High	High	27.84	3867.42	42	6.11355e+08	5.62527e+08	6.01826e+08	7.33655e+08	7.47363e+08	7.32734e+08	5.86795e+08	5.81122e+08	6.06704e+08	4.53256e+08	4.03589e+08	4.68477e+08	5.91902e+08	1	7.37918e+08	1	5.91541e+08	1	4.41774e+08	1	0.802125	0.000738981	1.33901	0.00207016
Bo9g108350.1	HSP81-1 description	pep chromosome:v2.1:C9:34604686:34607211:1 gene:Bo9g108350 transcript:Bo9g108350.1 gene_biotype:protein_coding transcript_biotype:protein_coding gene_symbol:HSP81-1 description:heat shock protein 90.1 :TAIR;Acc:AT5G52640](projected from arabidopsis_thaliana,AT5G52640)	42.4113	35	1703	19	1	705	81	5.05	High	High	High	High	High	High	High	High	High	High	High	High	6.678	3679.5	35	3.72076e+08	3.85842e+08	3.84414e+08	4.41487e+08	4.56087e+08	4.40503e+08	3.87595e+08	3.83802e+08	3.96874e+08	3.75636e+08	3.6655e+08	3.83457e+08	3.80778e+08	1	4.46025e+08	1	3.89423e+08	1	3.75214e+08	1	0.853713	0.000611874	1.03787	0.0850669
Bo8g107420.1	Glyceraldehyde-3-phosphate dehydrogenase	pep chromosome:v2.1:C8:38167286:38169781:1 gene:Bo8g107420 transcript:Bo8g107420.1 gene_biotype:protein_coding transcript_biotype:protein_coding description:Glyceraldehyde-3-phosphate dehydrogenase :UniProtKB/TrEMBL;Acc:A0A0D3DXJ2]	65.4494	19	1418	1	1	356	39.2	8.7	High	High	High	High	High	High	High	High	High	High	High	High	12.46	3631.76	19	2.94855e+08	2.54796e+08	2.73166e+08	3.63477e+08	3.36713e+08	3.8168e+08	1.93245e+08	1.78042e+08	221883320	1.87894e+08	1.90937e+08	2.08194e+08	2.74272e+08	1	3.60623e+08	1	1.97723e+08	1	1.95675e+08	1	0.760551	0.00777291	1.01047	0.893199
Bo3g065020.1		pep chromosome:v2.1:C3:24960995:24963363:-1 gene:Bo3g065020 transcript:Bo3g065020.1 gene_biotype:protein_coding transcript_biotype:protein_coding	64.9231	43	1311	5	1	650	71.2	5.25	High	High	High	High	High	High	High	High	High	High	High	High	27.84	3609.12	43	9.94651e+07	7.43966e+07	6.5487e+07	1.30048e+08	1.34587e+08	1.37802e+08	7.54856e+07	8.07366e+07	8.75991e+07	6.74172e+07	1.05414e+08	7.20366e+07	7.97829e+07	1	1.34146e+08	1	8.12738e+07	1	8.16225e+07	1	0.594749	0.00643423	0.995728	0.979036
Bo4g184810.1		pep chromosome:v2.1:C4:48961869:48963893:-1 gene:Bo4g184810 transcript:Bo4g184810.1 gene_biotype:protein_coding transcript_biotype:protein_coding	60.6825	44	1389	5	1	674	75.4	7.21	High	High	High	High	High	High	High	High	High	High	High	High	20.842	3488.07	44	1.312e+08	1.62533e+08	1.69823e+08	1.54003e+08	2.97048e+08	2.24139e+08	2.43123e+08	2.95907e+08	2.93077e+08	1.4116e+08	1.88372e+08	2.73638e+08	1.54519e+08	1	2.25063e+08	1	2.77369e+08	1	2.01057e+08	1	0.686556	0.175931	1.37956	0.146172
Bo2g012360.1		pep chromosome:v2.1:C2:3537901:3539455:-1 gene:Bo2g012360 transcript:Bo2g012360.1 gene_biotype:protein_coding transcript_biotype:protein_coding	71.3768	17	991	11	1	276	29.4	8.44	High	High	High	High	High	High	High	High	High	High	High	High	37.747	3407.05	17	2.4847e+09	2.66878e+09	2.96708e+09	3.0822e+09	3.23121e+09	3.46207e+09	3.07786e+09	3.22677e+09	3166342884	3.41076e+09	3.54145e+09	3.42697e+09	2.70686e+09	1	3.25849e+09	1	3.15699e+09	1	3.45973e+09	1	0.830708	0.0367366	0.912497	0.00711642
Bo1g039400.1	ATPAP24 description	pep chromosome:v2.1:C1:11979607:11982399:-1 gene:Bo1g039400 transcript:Bo1g039400.1 gene_biotype:protein_coding transcript_biotype:protein_coding gene_symbol:ATPAP24 description:purple acid phosphatase 24 :TAIR;Acc:AT4G24890](projected from arabidopsis_thaliana,AT4G24890)	54.4571	33	1233	30	1	617	69.4	6.54	High	High	High	High	High	High	High	High	High	High	High	High	16.343	3291.22	33	2.67063e+09	2.72115e+09	2.69118e+09	2.23974e+09	2.15783e+09	2.11745e+09	2.19162e+09	2.20338e+09	2222398465	2.50229e+09	2.40921e+09	2.48491e+09	2.69432e+09	1	2.17167e+09	1	2.2058e+09	1	2.46547e+09	1	1.24067	0.000176595	0.894677	0.000973777
Bo2g086370.1	sks18 description	pep chromosome:v2.1:C2:23893088:23895825:-1 gene:Bo2g086370 transcript:Bo2g086370.1 gene_biotype:protein_coding transcript_biotype:protein_coding gene_symbol:sks18 description:SKU5 similar 18 :TAIR;Acc:AT1G75790](projected from arabidopsis_thaliana,AT1G75790)	54.3021	23	1287	23	1	523	59.2	7.02	High	High	High	High	High	High	High	High	High	High	High	High	19.092	3128.28	23	3.39114e+09	3.22795e+09	3.14874e+09	2.59053e+09	2.44318e+09	2.52935e+09	2.64764e+09	2.72785e+09	2703021874	2.76804e+09	2.75648e+09	2.72533e+09	3.25594e+09	1	2.52102e+09	1	2.69284e+09	1	2.74995e+09	1	1.29152	0.000905905	0.979232	0.101148
Bo4g107880.1		pep chromosome:v2.1:C4:27109370:27110626:1 gene:Bo4g107880 transcript:Bo4g107880.1 gene_biotype:protein_coding transcript_biotype:protein_coding	31.3397	12	983	6	1	418	46.3	7.97	High	High	High	High	High	High	High	High	High	High	High	High	4.179	2940.03	12	1.22922e+09	1.30876e+09	1.88096e+09	1.18931e+09	1.35555e+09	1.24719e+09	2.09544e+09	2.40072e+09	2377253741	2.36012e+09	2.48144e+09	2.62668e+09	1.47298e+09	1	1.26402e+09	1	2.29114e+09	1	2.48941e+09	1	1.16532	0.378029	0.920351	0.187107
Bo5g138000.1	Cell division control protein 48 homolog A	pep chromosome:v2.1:C5:43118495:43121662:-1 gene:Bo5g138000 transcript:Bo5g138000.1 gene_biotype:protein_coding transcript_biotype:protein_coding description:Cell division control protein 48 homolog A :Projected from Arabidopsis thaliana (AT3G09840) UniProtKB/Swiss-Prot;Acc:P54609]	58.6634	46	1045	2	1	808	89.5	5.22	High	High	High	High	High	High	High	High	High	High	High	High	11.969	2878.07	46	2.06306e+08	1.4039e+08	1.16331e+08	2.51606e+08	2.60646e+08	2.80769e+08	1.99265e+08	2.46472e+08	1.13637e+08	1.20007e+08	9.10878e+07	1.81356e+08	1.54342e+08	1	2.6434e+08	1	1.86458e+08	1	1.30817e+08	1	0.583878	0.0176176	1.42534	0.303024
Bo1g144240.1		pep chromosome:v2.1:C1:41006608:41009546:-1 gene:Bo1g144240 transcript:Bo1g144240.1 gene_biotype:protein_coding transcript_biotype:protein_coding	58.642	46	1038	2	1	810	89.5	5.2	Not Found	Not Found	High	High	High	Not Found	Not Found	High	High	High	High	Not Found	11.452	2839.32	46	NA	NA	1.00958e+08	1.33841e+08	6.91087e+06	NA	NA	8.82239e+07	7.44914e+07	6.24066e+07	5.11442e+07	NA	1.00958e+08	0.333333	7.03761e+07	0.666667	8.13576e+07	0.666667	5.67754e+07	0.666667	1.43455	NA	1.43297	0.109479
Bo4g122950.1	Fructose-bisphosphate aldolase	pep chromosome:v2.1:C4:31813874:31815422:1 gene:Bo4g122950 transcript:Bo4g122950.1 gene_biotype:protein_coding transcript_biotype:protein_coding description:Fructose-bisphosphate aldolase :UniProtKB/TrEMBL;Acc:A0A0D3BYD7]	82.1229	27	878	3	1	358	38.5	6.73	High	High	High	High	High	High	High	High	High	High	High	High	33.333	2784.87	27	4.5576e+08	4.65906e+08	5.02332e+08	6.32038e+08	6.41967e+08	6.42539e+08	4.04139e+08	6.1108e+08	409636673	3.14637e+08	3.11078e+08	2.88369e+08	4.74666e+08	1	6.38848e+08	1	4.74952e+08	1	3.04695e+08	1	0.743003	0.000350987	1.55878	0.0680151
Bo6g067020.1	Aldolase superfamily protein	pep chromosome:v2.1:C6:18406031:18407480:-1 gene:Bo6g067020 transcript:Bo6g067020.1 gene_biotype:protein_coding transcript_biotype:protein_coding description:Aldolase superfamily protein :TAIR;Acc:AT3G52930](projected from arabidopsis_thaliana,AT3G52930)	82.1229	27	866	3	1	358	38.4	6.65	High	High	High	High	High	High	High	High	High	High	High	High	30.623	2750.63	27	5.31051e+08	5.30779e+08	4.59956e+08	7.20963e+08	8.63447e+08	8.6856e+08	5.39221e+08	4.55652e+08	4.89286e+08	2.65122e+08	2.8862e+08	2.83326e+08	5.07262e+08	1	8.17657e+08	1	4.9472e+08	1	2.79023e+08	1	0.620385	0.00449311	1.77305	0.00103828
Bo3g027200.1		pep chromosome:v2.1:C3:10131308:10134489:-1 gene:Bo3g027200 transcript:Bo3g027200.1 gene_biotype:protein_coding transcript_biotype:protein_coding	70.0342	42	963	9	1	584	61.8	6.33	High	High	High	High	High	High	High	High	High	High	High	High	13.454	2697.21	42	4.22942e+08	4.20701e+08	4.05321e+08	5.21104e+08	4.92857e+08	5.01111e+08	4.77116e+08	4.77494e+08	4.89537e+08	5.47743e+08	5.46473e+08	5.12808e+08	4.16321e+08	1	5.05024e+08	1	4.81382e+08	1	5.35675e+08	1	0.824359	0.000909221	0.898647	0.0110702
Bo4g043950.1		pep chromosome:v2.1:C4:9899769:9903166:1 gene:Bo4g043950 transcript:Bo4g043950.1 gene_biotype:protein_coding transcript_biotype:protein_coding	65.3516	41	956	8	1	583	61.7	5.92	High	High	High	High	High	High	High	High	High	High	High	High	14.264	2689.18	41	2.16143e+08	2.23295e+08	1.41232e+08	3.00805e+08	3.00937e+08	2.97471e+08	2.4948e+08	2.51509e+08	2.46701e+08	2.99572e+08	2.90187e+08	2.8075e+08	1.93557e+08	1	2.99738e+08	1	2.4923e+08	1	2.9017e+08	1	0.645753	0.0155757	0.858911	0.00187383
Bo3g082070.1	Chaperonin CPN60, mitochondrial	pep chromosome:v2.1:C3:30527031:30530302:-1 gene:Bo3g082070 transcript:Bo3g082070.1 gene_biotype:protein_coding transcript_biotype:protein_coding description:Chaperonin CPN60, mitochondrial :Projected from Arabidopsis thaliana (AT3G23990) UniProtKB/Swiss-Prot;Acc:P29197]	71.5771	40	977	27	1	577	61.3	5.76	High	High	High	High	High	High	High	High	High	High	High	High	12.111	2639.33	40	1.36397e+09	1.34534e+09	1.31918e+09	1.53679e+09	1.51018e+09	1.50695e+09	1.45697e+09	1.48586e+09	1508910190	1.78831e+09	1.77575e+09	1.70206e+09	1.34283e+09	1	1.51797e+09	1	1.48391e+09	1	1.75537e+09	1	0.88462	0.000402038	0.845356	0.000915907
Bo3g002290.1	ATPase, AAA-type, CDC48 protein	pep chromosome:v2.1:C3:592320:595256:-1 gene:Bo3g002290 transcript:Bo3g002290.1 gene_biotype:protein_coding transcript_biotype:protein_coding description:ATPase, AAA-type, CDC48 protein :TAIR;Acc:AT5G03340](projected from arabidopsis_thaliana,AT5G03340)	54.8148	44	939	10	1	810	89.8	5.26	High	High	High	High	High	High	High	High	High	High	High	High	10.121	2530.67	44	3.64212e+08	3.47256e+08	3.43272e+08	3.51838e+08	3.35232e+08	3.41719e+08	3.34081e+08	3.78917e+08	3.63038e+08	3.47393e+08	3.41128e+08	3.33876e+08	3.5158e+08	1	3.4293e+08	1	3.58679e+08	1	3.40799e+08	1	1.02523	0.342252	1.05246	0.261702
Bo3g012860.1		pep chromosome:v2.1:C3:4377713:4381158:1 gene:Bo3g012860 transcript:Bo3g012860.1 gene_biotype:protein_coding transcript_biotype:protein_coding	49.1503	31	816	1	1	765	84.4	6.47	High	High	High	High	High	High	High	High	High	High	High	High	4.466	2465.8	31	1.08619e+08	9.96712e+07	1.13399e+08	1.46686e+08	1.52914e+08	1.40899e+08	1.06756e+08	1.06223e+08	9.26365e+07	8.14326e+07	8.19394e+07	8.35085e+07	1.0723e+08	1	1.46833e+08	1	1.01872e+08	1	8.22935e+07	1	0.730284	0.00173004	1.23791	0.0137038
Bo4g033430.1		pep chromosome:v2.1:C4:7293510:7296113:1 gene:Bo4g033430 transcript:Bo4g033430.1 gene_biotype:protein_coding transcript_biotype:protein_coding	62.6126	23	802	1	1	444	47.5	5.78	High	High	High	High	High	High	Not Found	High	High	High	High	High	9.661	2456.09	23	1.03391e+08	1.11579e+08	8.96917e+07	1.1915e+08	1.029e+08	1.01135e+08	NA	3.12301e+07	3.37985e+07	8.09577e+07	8.83625e+07	7.60349e+07	1.01554e+08	1	1.07728e+08	1	3.25143e+07	0.666667	8.1785e+07	1	0.942686	0.51163	0.397558	0.00188028
Bo1g157520.1		pep chromosome:v2.1:C1:43487599:43490278:-1 gene:Bo1g157520 transcript:Bo1g157520.1 gene_biotype:protein_coding transcript_biotype:protein_coding	63.9098	31	838	6	1	532	59	6.6	High	High	High	High	High	High	High	High	High	High	High	High	11.389	2435.65	31	4.58705e+08	4.54642e+08	4.47835e+08	5.35769e+08	5.32059e+08	5.53333e+08	5.62044e+08	5.2118e+08	5.18164e+08	7.02957e+08	6.69306e+08	6.67955e+08	4.53727e+08	1	5.40387e+08	1	5.33796e+08	1	6.80073e+08	1	0.839634	0.000286371	0.78491	0.00130131
Bo2g014090.1		pep chromosome:v2.1:C2:4567010:4570435:1 gene:Bo2g014090 transcript:Bo2g014090.1 gene_biotype:protein_coding transcript_biotype:protein_coding	49.1503	31	789	2	1	765	84.3	6.47	High	High	High	High	High	High	High	High	High	High	High	High	4.466	2428.34	31	5.56882e+08	5.37698e+08	2.52419e+08	3.03375e+08	2.49221e+08	4.1868e+08	1.84606e+08	2.8234e+08	289779072	3.37896e+08	3.04714e+08	3.07929e+08	4.49e+08	1	3.23759e+08	1	2.52242e+08	1	3.16846e+08	1	1.38683	0.319995	0.796101	0.142859
Bo3g030160.1		pep chromosome:v2.1:C3:11422019:11424571:-1 gene:Bo3g030160 transcript:Bo3g030160.1 gene_biotype:protein_coding transcript_biotype:protein_coding	68.6937	24	780	1	1	444	47.5	5.78	High	High	High	High	High	High	High	High	High	High	High	High	10.365	2398.08	24	3.4109e+08	3.92924e+08	3.52084e+08	3.36589e+08	3.44574e+08	3.51614e+08	2.88947e+08	3.13685e+08	305771482	3.32676e+08	3.52397e+08	3.55163e+08	3.62033e+08	1	3.44259e+08	1	3.02801e+08	1	3.46745e+08	1	1.05163	0.33825	0.873266	0.0124173
Bo3g004300.1		pep chromosome:v2.1:C3:1582776:1587435:-1 gene:Bo3g004300 transcript:Bo3g004300.1 gene_biotype:protein_coding transcript_biotype:protein_coding	51.1628	43	880	16	1	989	107.6	7.44	High	High	High	High	High	High	High	High	High	High	High	High	5.615	2373.47	43	2.76365e+08	2.94541e+08	2.79938e+08	3.28017e+08	3.27377e+08	3.2172e+08	2.61636e+08	2.77232e+08	2.61675e+08	1.89993e+08	1.95992e+08	1.98511e+08	2.83615e+08	1	3.25705e+08	1	2.66848e+08	1	1.94832e+08	1	0.870773	0.00205275	1.36963	0.000237676
Bo8g115880.1		pep chromosome:v2.1:C8:40983568:40985165:1 gene:Bo8g115880 transcript:Bo8g115880.1 gene_biotype:protein_coding transcript_biotype:protein_coding	70.4861	15	886	4	1	288	32	9.38	High	High	High	High	High	High	High	High	High	High	High	High	10.938	2323.83	15	1.36477e+08	1.31417e+08	1.38163e+08	1.43032e+08	1.62537e+08	1.65115e+08	1.39206e+08	1.44923e+08	1.76624e+08	1.74517e+08	1.60206e+08	1.8041e+08	1.35353e+08	1	1.56895e+08	1	1.53584e+08	1	1.71711e+08	1	0.862697	0.0412531	0.894435	0.238427
Bo2g011210.1	Auxin-responsive GH3 family protein	pep chromosome:v2.1:C2:2976627:2979715:1 gene:Bo2g011210 transcript:Bo2g011210.1 gene_biotype:protein_coding transcript_biotype:protein_coding description:Auxin-responsive GH3 family protein :Projected from Arabidopsis thaliana (AT5G13380) TAIR;Acc:AT5G13380]	66.3866	31	738	31	1	595	67.1	6.14	High	High	High	High	High	High	High	High	High	High	High	High	9	2289.48	31	1.31882e+09	1.45467e+09	1.42371e+09	9.082e+08	9.79688e+08	9.48281e+08	8.49222e+08	8.51753e+08	896835812	1.03186e+09	1.02367e+09	1.06871e+09	1.39907e+09	1	9.4539e+08	1	8.65937e+08	1	1.04141e+09	1	1.47988	0.000593923	0.831502	0.00107353
Bo8g002640.1		pep chromosome:v2.1:C8:410421:415623:-1 gene:Bo8g002640 transcript:Bo8g002640.1 gene_biotype:protein_coding transcript_biotype:protein_coding	30.5164	18	854	2	1	852	97.2	7.08	High	High	High	High	High	High	High	High	High	High	High	High	1.59	2239.2	18	1.7805e+08	1.65504e+08	1.29613e+08	1.91638e+08	1.78029e+08	1.12694e+08	1.02875e+08	1.54064e+08	3.7689e+07	1.88546e+08	1.23645e+08	1.76456e+08	1.57722e+08	1	1.60787e+08	1	9.82092e+07	1	1.62883e+08	1	0.980941	0.919156	0.602945	0.173713
Bo2g161640.1		pep chromosome:v2.1:C2:50931684:50934267:-1 gene:Bo2g161640 transcript:Bo2g161640.1 gene_biotype:protein_coding transcript_biotype:protein_coding	50.2804	26	804	7	1	535	60.8	4.89	High	High	High	High	High	High	High	High	High	High	High	High	9.608	2217.79	26	9.06277e+08	8.58423e+08	9.51399e+08	8.53015e+08	1.05258e+09	1.06141e+09	6.94289e+08	7.46088e+08	6.96688e+08	7.39177e+08	9.0165e+08	8.84914e+08	9.05366e+08	1	9.89004e+08	1	7.12355e+08	1	8.41913e+08	1	0.915433	0.316641	0.846115	0.075448
Bo5g138170.1		pep chromosome:v2.1:C5:43234656:43236230:-1 gene:Bo5g138170 transcript:Bo5g138170.1 gene_biotype:protein_coding transcript_biotype:protein_coding	53.9409	23	739	5	1	406	44.6	10.24	High	High	High	High	High	High	High	High	High	High	High	High	15.298	2207.34	23	4.65015e+08	4.14834e+08	3.12521e+08	3.61368e+08	3.63075e+08	3.6597e+08	3.58117e+08	3.73117e+08	3.62991e+08	3.11263e+08	2.98559e+08	3.05124e+08	3.97457e+08	1	3.63471e+08	1	3.64742e+08	1	3.04982e+08	1	1.0935	0.491152	1.19595	0.000481428
Bo3g100810.1		pep chromosome:v2.1:C3:35951732:35953370:1 gene:Bo3g100810 transcript:Bo3g100810.1 gene_biotype:protein_coding transcript_biotype:protein_coding	75.7447	31	763	13	1	470	51.8	6.19	High	High	High	High	High	High	High	High	High	High	High	High	13.962	2191.38	31	1.1908e+09	1.22942e+09	1.20125e+09	1.18583e+09	1.23361e+09	1.20627e+09	9.9792e+08	9.85482e+08	1036831637	1.13974e+09	1.09841e+09	1.07186e+09	1.20716e+09	1	1.20857e+09	1	1.00674e+09	1	1.10334e+09	1	0.998831	0.941235	0.912454	0.0182953
Bo3g153120.1		pep chromosome:v2.1:C3:54393307:54395790:1 gene:Bo3g153120 transcript:Bo3g153120.1 gene_biotype:protein_coding transcript_biotype:protein_coding	46.5492	33	790	8	1	681	72.9	6.15	High	High	High	High	High	High	High	High	High	High	High	High	5.769	2180.52	33	6.91134e+08	6.8531e+08	7.69304e+08	9.8358e+08	9.11954e+08	1.07143e+09	7.43101e+08	5.38325e+08	7.89953e+08	9.69233e+08	9.51626e+08	9.0639e+08	7.15249e+08	1	9.88988e+08	1	6.9046e+08	1	9.42416e+08	1	0.723213	0.00689277	0.732648	0.0338756
Bo3g022290.1		pep chromosome:v2.1:C3:7685017:7687333:1 gene:Bo3g022290 transcript:Bo3g022290.1 gene_biotype:protein_coding transcript_biotype:protein_coding	66.8524	22	824	3	1	359	39	8.97	High	High	High	High	High	High	High	High	High	High	High	High	12.335	2176.62	22	7.58759e+08	7.66518e+08	7.48932e+08	9.62989e+08	9.4761e+08	9.26346e+08	1.38533e+09	1.33543e+09	1424728447	1.28677e+09	8.91871e+08	9.91502e+08	7.5807e+08	1	9.45648e+08	1	1.38183e+09	1	1.05672e+09	1	0.80164	9.08978e-05	1.30766	0.0552831
Bo3g020870.1		pep chromosome:v2.1:C3:6897754:6900525:-1 gene:Bo3g020870 transcript:Bo3g020870.1 gene_biotype:protein_coding transcript_biotype:protein_coding	59.6639	39	760	7	1	595	63	5.74	High	High	High	High	High	High	High	High	High	High	High	High	7.756	2174.41	39	4.81816e+08	3.6939e+08	4.84248e+08	4.04844e+08	4.56209e+08	5.99784e+08	3.06296e+08	3.43009e+08	3.53836e+08	5.90309e+08	3.94128e+08	4.20716e+08	4.45151e+08	1	4.86946e+08	1	3.3438e+08	1	4.68384e+08	1	0.914171	0.58033	0.713902	0.100943
Bo5g156500.1		pep chromosome:v2.1:C5:46886593:46889321:1 gene:Bo5g156500 transcript:Bo5g156500.1 gene_biotype:protein_coding transcript_biotype:protein_coding	59.1682	29	739	4	1	529	58.7	6.49	High	High	High	High	High	High	High	High	High	High	High	High	9	2151.39	29	2.93392e+08	2.85523e+08	3.1055e+08	3.72992e+08	3.73147e+08	3.7883e+08	4.14728e+08	4.20736e+08	4.23212e+08	4.73586e+08	4.61717e+08	4.50474e+08	2.96488e+08	1	3.7499e+08	1	4.19559e+08	1	4.61926e+08	1	0.790657	0.000504466	0.908282	0.00402749
Bo1g144400.1		pep chromosome:v2.1:C1:41067445:41069210:-1 gene:Bo1g144400 transcript:Bo1g144400.1 gene_biotype:protein_coding transcript_biotype:protein_coding	52.3342	22	705	4	1	407	44.6	10.3	High	High	High	High	High	High	High	High	High	High	High	High	13.175	2143.5	22	1.43587e+08	2.46319e+08	2.33917e+08	9.6543e+07	9.95744e+07	1.7766e+08	2.00531e+08	1.95426e+08	1.99196e+08	1.55105e+08	1.62321e+08	9.5138e+07	2.07941e+08	1	1.24593e+08	1	1.98384e+08	1	1.37522e+08	1	1.66897	0.117355	1.44257	0.0463541
Bo1g017400.1		pep chromosome:v2.1:C1:6030349:6031793:1 gene:Bo1g017400 transcript:Bo1g017400.1 gene_biotype:protein_coding transcript_biotype:protein_coding	65.8621	16	825	7	1	290	32	9.45	High	High	High	High	High	High	High	High	High	High	High	High	9	2079.42	16	4.26597e+08	4.30059e+08	4.4957e+08	5.11502e+08	5.26227e+08	5.44531e+08	4.94444e+08	4.72331e+08	4.8414e+08	5.04703e+08	5.05703e+08	5.11095e+08	4.35408e+08	1	5.2742e+08	1	4.83639e+08	1	5.07167e+08	1	0.825544	0.0015227	0.953608	0.0245113
Bo3g002090.1		pep chromosome:v2.1:C3:506042:507479:1 gene:Bo3g002090 transcript:Bo3g002090.1 gene_biotype:protein_coding transcript_biotype:protein_coding	48.7685	19	664	1	1	406	44.7	10.24	High	High	High	High	High	Not Found	Not Found	Not Found	High	High	High	High	10.498	2064.62	19	1.48544e+08	1.39596e+08	1.40771e+08	1.42733e+08	1.15822e+08	NA	NA	NA	144686275	9.09822e+07	8.87964e+07	8.98056e+07	1.4297e+08	1	1.29277e+08	0.666667	144686275	0.333333	8.98614e+07	1	1.10592	0.289312	1.61011	NA
Bo9g133110.1	Plasma membrane ATPase	pep chromosome:v2.1:C9:40594331:40600201:-1 gene:Bo9g133110 transcript:Bo9g133110.1 gene_biotype:protein_coding transcript_biotype:protein_coding description:Plasma membrane ATPase :UniProtKB/TrEMBL;Acc:A0A0D3EC41]	42.9622	38	793	12	1	952	104.2	6.7	High	High	High	High	High	High	High	High	High	High	High	High	4.817	2063.27	38	5.52343e+08	5.35327e+08	5.27923e+08	4.42342e+08	4.4494e+08	4.38986e+08	3.84327e+08	3.76915e+08	3.61605e+08	2.89892e+08	2.83791e+08	2.759e+08	5.38531e+08	1	4.42089e+08	1	3.74282e+08	1	2.83194e+08	1	1.21815	0.000203459	1.32164	0.000310572
Bo1g147190.1		pep chromosome:v2.1:C1:41565038:41569697:-1 gene:Bo1g147190 transcript:Bo1g147190.1 gene_biotype:protein_coding transcript_biotype:protein_coding	49.5878	39	792	14	1	849	95.9	5.58	High	High	High	High	High	High	High	High	High	High	High	High	4.806	2058.93	39	3.96753e+08	3.99896e+08	4.0473e+08	4.85832e+08	4.83457e+08	4.07596e+08	4.11944e+08	3.85298e+08	4.12807e+08	4.18371e+08	4.19013e+08	4.14348e+08	4.0046e+08	1	4.58962e+08	1	4.03349e+08	1	4.17244e+08	1	0.872534	0.0859335	0.966699	0.203364
Bo1g134770.1		pep chromosome:v2.1:C1:38799110:38800850:1 gene:Bo1g134770 transcript:Bo1g134770.1 gene_biotype:protein_coding transcript_biotype:protein_coding	55.3398	26	776	3	1	412	46.7	5.58	High	High	High	High	High	High	High	High	High	High	High	High	20.063	2055.33	26	1.60515e+08	1.92154e+08	1.57021e+08	1.94583e+08	2.09877e+08	2.0359e+08	1.68818e+08	1.62415e+08	2.24265e+08	1.68999e+08	1.72254e+08	1.61744e+08	1.69897e+08	1	2.02684e+08	1	1.85166e+08	1	1.67666e+08	1	0.838236	0.0526124	1.10437	0.428436
Bo2g042150.1		pep chromosome:v2.1:C2:11685608:11688929:1 gene:Bo2g042150 transcript:Bo2g042150.1 gene_biotype:protein_coding transcript_biotype:protein_coding	44.5076	22	786	3	1	528	57.1	5.74	High	High	High	High	High	High	High	High	High	High	High	High	5.244	2047.93	22	2.31192e+08	2.65856e+08	2.45874e+08	2.72867e+08	2.87756e+08	2.92594e+08	2.21205e+08	2.07378e+08	2.22794e+08	2.18582e+08	2.48356e+08	2.30553e+08	2.4764e+08	1	2.84406e+08	1	2.17126e+08	1	2.32497e+08	1	0.87073	0.0344853	0.933887	0.196871
Bo9g159630.1		pep chromosome:v2.1:C9:46998749:47002146:-1 gene:Bo9g159630 transcript:Bo9g159630.1 gene_biotype:protein_coding transcript_biotype:protein_coding	45.1007	26	675	2	1	745	82.6	6.2	High	High	High	High	High	High	High	High	High	High	High	High	3.299	2041.7	26	3.20028e+08	3.58152e+08	3.56957e+08	3.47818e+08	3.53104e+08	3.86467e+08	3.9384e+08	3.9175e+08	4.25344e+08	3.1235e+08	2.93009e+08	3.50307e+08	3.45045e+08	1	3.62463e+08	1	4.03644e+08	1	3.18555e+08	1	0.951947	0.373618	1.26711	0.0131829
Bo6g031540.1		pep chromosome:v2.1:C6:7697360:7700542:-1 gene:Bo6g031540 transcript:Bo6g031540.1 gene_biotype:protein_coding transcript_biotype:protein_coding	58.1907	36	741	11	1	818	90.3	5.26	High	High	High	High	High	High	High	High	High	High	High	High	5.218	2035.61	36	3.60615e+08	3.74088e+08	3.78794e+08	5.04474e+08	4.89467e+08	4.92877e+08	3.97791e+08	3.85166e+08	4.04123e+08	2.79608e+08	2.80067e+08	2.83834e+08	3.71166e+08	1	4.95606e+08	1	3.95694e+08	1	2.8117e+08	1	0.748913	6.19708e-05	1.40731	3.69972e-05
Bo6g120660.1	Phosphofructokinase family protein	pep chromosome:v2.1:C6:38066996:38070907:-1 gene:Bo6g120660 transcript:Bo6g120660.1 gene_biotype:protein_coding transcript_biotype:protein_coding description:Phosphofructokinase family protein :TAIR;Acc:AT1G76550](projected from arabidopsis_thaliana,AT1G76550)	59.8055	31	717	17	1	617	67.5	7.36	High	High	High	High	High	High	High	High	High	High	High	High	6.543	2030.89	31	5.74199e+08	5.29266e+08	5.53707e+08	6.09621e+08	5.95074e+08	5.72626e+08	5.97507e+08	6.07873e+08	6.19679e+08	5.75865e+08	5.19574e+08	5.33519e+08	5.52391e+08	1	5.9244e+08	1	6.08353e+08	1	5.42986e+08	1	0.932398	0.0764381	1.12038	0.0225145
Bo6g069590.1		pep chromosome:v2.1:C6:19897849:19901448:1 gene:Bo6g069590 transcript:Bo6g069590.1 gene_biotype:protein_coding transcript_biotype:protein_coding	44.6411	38	724	4	1	1017	115.2	6.89	High	High	High	High	High	High	High	High	High	High	High	High	4.623	2024.44	38	9.38727e+07	7.42084e+07	7.86065e+07	1.16549e+08	1.13673e+08	6.84861e+07	7.50727e+07	7.01598e+07	7.75201e+07	9.34249e+07	8.37572e+07	6.51353e+07	8.22292e+07	1	9.95695e+07	1	7.42509e+07	1	8.07724e+07	1	0.825848	0.356868	0.91926	0.489497
Bo8g066630.1		pep chromosome:v2.1:C8:21405533:21407485:-1 gene:Bo8g066630 transcript:Bo8g066630.1 gene_biotype:protein_coding transcript_biotype:protein_coding	55.2308	30	651	6	1	650	71.4	5.38	High	High	High	High	High	High	High	High	High	High	High	High	6.906	2023.74	30	4.9966e+07	1.26605e+08	1.07101e+08	2.44875e+08	2.35525e+08	2.2119e+08	9.91535e+07	1.03379e+08	131008450	1.0837e+08	1.05947e+08	1.15614e+08	9.45572e+07	1	2.33863e+08	1	1.1118e+08	1	1.09977e+08	1	0.404327	0.00438566	1.01094	0.913487
Bo3g097740.1	2-oxoglutarate dehydrogenase, E1 component	pep chromosome:v2.1:C3:35039094:35042688:-1 gene:Bo3g097740 transcript:Bo3g097740.1 gene_biotype:protein_coding transcript_biotype:protein_coding description:2-oxoglutarate dehydrogenase, E1 component :TAIR;Acc:AT5G65750](projected from arabidopsis_thaliana,AT5G65750)	46.3054	40	746	25	1	1015	114.9	6.92	High	High	High	High	High	High	High	High	High	High	High	High	5.27	2015.54	40	2.6708e+08	2.93814e+08	2.94923e+08	3.08904e+08	3.14561e+08	3.15279e+08	2.11787e+08	2.27076e+08	3.03178e+08	3.60559e+08	3.59468e+08	3.71138e+08	2.85272e+08	1	3.12915e+08	1	2.47347e+08	1	3.63722e+08	1	0.911662	0.0413411	0.680044	0.0150684
Bo3g086730.1		pep chromosome:v2.1:C3:31912157:31920391:1 gene:Bo3g086730 transcript:Bo3g086730.1 gene_biotype:protein_coding transcript_biotype:protein_coding	29.2802	32	693	6	1	1431	156.4	6.89	High	High	High	High	High	High	High	High	High	High	High	High	2.014	1988.98	32	1.82678e+08	1.82833e+08	1.72372e+08	2.03309e+08	2.01228e+08	1.77597e+08	1.17672e+08	1.16701e+08	116328132	9.43926e+07	9.22539e+07	9.4234e+07	1.79294e+08	1	1.94045e+08	1	1.169e+08	1	9.36268e+07	1	0.923984	0.174404	1.24858	8.15293e-06
Bo5g136830.1	Clathrin heavy chain	pep chromosome:v2.1:C5:42501037:42509340:1 gene:Bo5g136830 transcript:Bo5g136830.1 gene_biotype:protein_coding transcript_biotype:protein_coding description:Clathrin heavy chain :UniProtKB/TrEMBL;Acc:A0A0D3CL97]	36.0281	54	705	3	1	1707	193.3	5.38	High	High	High	High	High	High	High	High	High	High	High	High	2.571	1988.11	54	3.64496e+07	4.44808e+07	5.13181e+07	6.1024e+07	6.20385e+07	5.42809e+07	4.94433e+07	5.29498e+07	5.51685e+07	4.77481e+07	5.05464e+07	5.27047e+07	4.40829e+07	1	5.91145e+07	1	5.25205e+07	1	5.03331e+07	1	0.74572	0.0382607	1.04346	0.37619
Bo1g022580.1	Tubulin beta chain	pep chromosome:v2.1:C1:8473498:8475145:1 gene:Bo1g022580 transcript:Bo1g022580.1 gene_biotype:protein_coding transcript_biotype:protein_coding description:Tubulin beta chain :UniProtKB/TrEMBL;Acc:A0A0D3A4N8]	51.3514	20	676	4	1	481	54.1	4.96	High	High	High	High	High	High	High	High	High	High	High	High	18.783	1984.98	20	8.47209e+07	8.60033e+07	1.18139e+08	8.07912e+07	8.23336e+07	8.46101e+07	8.99326e+07	1.14634e+08	1.2557e+08	9.67167e+07	8.58296e+07	7.78549e+07	9.62876e+07	1	8.25783e+07	1	1.10046e+08	1	8.68004e+07	1	1.16602	0.280205	1.2678	0.121874
Bo5g021500.1		pep chromosome:v2.1:C5:7653935:7655878:-1 gene:Bo5g021500 transcript:Bo5g021500.1 gene_biotype:protein_coding transcript_biotype:protein_coding	57.4961	33	678	9	1	647	71	5.59	High	High	High	High	High	High	High	High	High	High	High	High	7.318	1982.63	33	1.1766e+08	1.19356e+08	1.17627e+08	2.51896e+08	2.4014e+08	2.38691e+08	1.43121e+08	1.2653e+08	1.57979e+08	1.28058e+08	1.3398e+08	1.29806e+08	1.18214e+08	1	2.43576e+08	1	1.42543e+08	1	1.30615e+08	1	0.485328	7.64726e-06	1.09133	0.266771
Bo4g186340.1		pep chromosome:v2.1:C4:49382250:49384573:-1 gene:Bo4g186340 transcript:Bo4g186340.1 gene_biotype:protein_coding transcript_biotype:protein_coding	76.2295	22	630	2	1	366	39.2	5.47	High	High	High	High	High	High	High	High	High	High	High	High	10.659	1980.13	22	1.44163e+08	1.50735e+08	1.29149e+08	7.23382e+07	6.59271e+07	5.98454e+07	4.67359e+07	5.35008e+07	101934244	1.25609e+08	7.14211e+07	6.69105e+07	1.41349e+08	1	6.60369e+07	1	6.73903e+07	1	8.79801e+07	1	2.14045	0.000507669	0.765972	0.467085
Bo2g008600.1		pep chromosome:v2.1:C2:1575296:1581171:-1 gene:Bo2g008600 transcript:Bo2g008600.1 gene_biotype:protein_coding transcript_biotype:protein_coding	46.6531	41	744	15	1	986	107.6	7.28	High	High	High	High	High	High	High	High	High	High	High	High	4.422	1964.48	41	1.05332e+08	1.16674e+08	1.16614e+08	1.49828e+08	1.49782e+08	1.54209e+08	1.10264e+08	1.17086e+08	1.22595e+08	9.61094e+07	9.57941e+07	9.90045e+07	1.12873e+08	1	1.51273e+08	1	1.16648e+08	1	9.69693e+07	1	0.746156	0.000688164	1.20294	0.00606763
Bo1g003310.1		pep chromosome:v2.1:C1:647994:650435:1 gene:Bo1g003310 transcript:Bo1g003310.1 gene_biotype:protein_coding transcript_biotype:protein_coding	46.7742	31	685	9	1	682	72.9	5.9	High	High	High	High	High	High	High	High	High	High	High	High	4.569	1952.96	31	3.85343e+08	3.9931e+08	3.94618e+08	5.39278e+08	5.29206e+08	5.61722e+08	4.49906e+08	4.58824e+08	4.61015e+08	4.13317e+08	4.35557e+08	4.27114e+08	3.93091e+08	1	5.43402e+08	1	4.56582e+08	1	4.25329e+08	1	0.723388	0.000135757	1.07348	0.0129452
Bo3g184600.1		pep chromosome:v2.1:C3:64114442:64115847:1 gene:Bo3g184600 transcript:Bo3g184600.1 gene_biotype:protein_coding transcript_biotype:protein_coding	50.2427	24	718	1	1	412	46.7	5.57	High	High	High	High	High	High	High	High	High	High	High	High	16.475	1951.37	24	1.89254e+08	1.72274e+08	1.03011e+08	2.35325e+08	1.11208e+08	2.362e+08	2.2596e+08	2.35049e+08	2.22231e+08	1.17978e+08	1.97152e+08	2.01771e+08	1.54846e+08	1	1.94244e+08	1	2.27747e+08	1	1.723e+08	1	0.797174	0.468037	1.3218	0.113599
Bo9g068210.1		pep chromosome:v2.1:C9:20437024:20440989:-1 gene:Bo9g068210 transcript:Bo9g068210.1 gene_biotype:protein_coding transcript_biotype:protein_coding	44.0628	38	693	6	1	1019	115.3	6.76	High	High	High	High	High	High	High	High	High	High	High	High	4.532	1948.26	38	3.3178e+07	4.06421e+07	2.3142e+07	7.9645e+07	4.78105e+07	4.56377e+07	9.51204e+07	9.93092e+07	9.21013e+07	3.82455e+07	7.862e+07	8.27432e+07	3.23207e+07	1	5.76977e+07	1	9.55103e+07	1	6.65363e+07	1	0.560173	0.104064	1.43546	0.113585
Bo5g004160.1		pep chromosome:v2.1:C5:1080209:1081667:-1 gene:Bo5g004160 transcript:Bo5g004160.1 gene_biotype:protein_coding transcript_biotype:protein_coding	72.2222	14	744	5	1	288	31.8	9.39	High	High	High	High	High	High	High	High	High	High	High	High	6.017	1944.76	14	2.72949e+08	3.23889e+08	3.20848e+08	3.43065e+08	1.00861e+09	4.77416e+08	3.46758e+08	3.97054e+08	4.01498e+08	3.57663e+08	3.47889e+08	3.5291e+08	3.05895e+08	1	6.09696e+08	1	3.8177e+08	1	3.52821e+08	1	0.501718	0.210412	1.08205	0.178782
Bo3g025300.1		pep chromosome:v2.1:C3:9598393:9599752:1 gene:Bo3g025300 transcript:Bo3g025300.1 gene_biotype:protein_coding transcript_biotype:protein_coding	62.6506	18	701	2	1	249	27.3	9.5	High	High	High	High	High	High	High	High	High	High	High	High	19.806	1938.73	18	7.06172e+08	7.18681e+08	8.70863e+08	5.7898e+08	7.24298e+08	5.93252e+08	9.85674e+08	1.02016e+09	1049503635	9.64226e+08	9.05048e+08	9.15964e+08	7.65238e+08	1	6.32177e+08	1	1.01845e+09	1	9.28413e+08	1	1.21048	0.13129	1.09698	0.0254403
Bo3g107240.1	Tubulin beta-2 chain	pep chromosome:v2.1:C3:37770974:37772928:-1 gene:Bo3g107240 transcript:Bo3g107240.1 gene_biotype:protein_coding transcript_biotype:protein_coding description:Tubulin beta-2 chain :Projected from Arabidopsis thaliana (AT5G62690) UniProtKB/Swiss-Prot;Acc:Q56YW9]	53.6	22	690	5	1	500	56.4	5.12	High	High	High	High	High	High	High	High	High	High	High	High	18.953	1935.95	22	2.06768e+08	2.46063e+08	3.04719e+08	2.25402e+08	2.69974e+08	2.17666e+08	3.23697e+08	3.57212e+08	3.33687e+08	3.43121e+08	3.31701e+08	3.35728e+08	2.52517e+08	1	2.37681e+08	1	3.38199e+08	1	3.3685e+08	1	1.06242	0.674463	1.004	0.903832
Bo3g064010.1	Clathrin heavy chain	pep chromosome:v2.1:C3:24350742:24359162:-1 gene:Bo3g064010 transcript:Bo3g064010.1 gene_biotype:protein_coding transcript_biotype:protein_coding description:Clathrin heavy chain :UniProtKB/TrEMBL;Acc:A0A0D3BAN9]	36.8483	56	688	7	1	1707	193.2	5.36	High	High	High	High	High	High	High	High	High	High	High	High	2.819	1918.25	56	3.97091e+07	4.04868e+07	4.70017e+07	6.23679e+07	5.2434e+07	5.73014e+07	3.56476e+07	4.24858e+07	2.93728e+07	3.90547e+07	5.27414e+07	5.45746e+07	4.23992e+07	1	5.73678e+07	1	3.58354e+07	1	4.87903e+07	1	0.739077	0.0153074	0.734478	0.104482
Bo4g169440.1	Tubulin beta chain	pep chromosome:v2.1:C4:45354129:45355734:-1 gene:Bo4g169440 transcript:Bo4g169440.1 gene_biotype:protein_coding transcript_biotype:protein_coding description:Tubulin beta chain :UniProtKB/TrEMBL;Acc:A0A0D3C2W7]	59.8214	22	679	1	1	448	50.5	4.86	High	High	High	High	High	High	High	High	High	High	High	High	27.943	1917.02	22	1.04052e+08	1.06793e+08	1.03434e+08	8.59682e+07	8.09114e+07	8.95224e+07	1.3778e+08	1.33617e+08	1.41113e+08	1.45526e+08	1.40637e+08	1.26577e+08	1.0476e+08	1	8.54673e+07	1	1.37503e+08	1	1.3758e+08	1	1.22573	0.00203851	0.99944	0.990502
Bo7g067360.1	Tubulin beta chain	pep chromosome:v2.1:C7:26250980:26252621:-1 gene:Bo7g067360 transcript:Bo7g067360.1 gene_biotype:protein_coding transcript_biotype:protein_coding description:Tubulin beta chain :UniProtKB/TrEMBL;Acc:A0A0D3D8X0]	48.1092	19	647	3	1	476	53.4	4.97	High	High	High	High	High	High	High	High	High	High	High	High	14.086	1915.13	19	2.94069e+08	2.90403e+08	2.02786e+08	1.41681e+08	2.51204e+08	1.40179e+08	1.71782e+08	1.55385e+08	1.52841e+08	2.57958e+08	3.17455e+08	2.32232e+08	2.62419e+08	1	1.77688e+08	1	1.60003e+08	1	2.69215e+08	1	1.47685	0.148007	0.59433	0.0135594
Bo4g050670.1		pep chromosome:v2.1:C4:11458839:11460107:1 gene:Bo4g050670 transcript:Bo4g050670.1 gene_biotype:protein_coding transcript_biotype:protein_coding	62.6506	18	695	1	1	249	27.4	9.5	High	High	High	High	High	High	High	High	High	High	High	High	19.806	1914.6	18	3.08369e+08	3.01329e+08	3.01631e+08	2.76615e+08	2.52282e+08	1.28382e+08	1.06115e+08	1.52738e+08	2.42365e+08	2.47266e+08	2.27303e+08	2.25432e+08	3.03776e+08	1	2.19093e+08	1	1.67072e+08	1	2.33334e+08	1	1.38652	0.139146	0.716023	0.177885
Bo4g176220.1		pep chromosome:v2.1:C4:46741130:46742670:-1 gene:Bo4g176220 transcript:Bo4g176220.1 gene_biotype:protein_coding transcript_biotype:protein_coding	62.6506	18	692	1	1	249	27.5	9.41	High	High	High	High	High	High	High	High	High	High	High	High	19.806	1912.7	18	5.77573e+08	5.79956e+08	5.75834e+08	3.96451e+08	4.25064e+08	4.33384e+08	5.85258e+08	6.0392e+08	615726304	5.20637e+08	5.27318e+08	4.92906e+08	5.77788e+08	1	4.183e+08	1	6.01635e+08	1	5.1362e+08	1	1.38128	0.000143696	1.17136	0.00307674
Bo2g018540.1		pep chromosome:v2.1:C2:5475153:5479361:1 gene:Bo2g018540 transcript:Bo2g018540.1 gene_biotype:protein_coding transcript_biotype:protein_coding	54.1009	32	696	11	1	634	71.2	7.23	High	High	High	High	High	High	High	High	High	High	High	High	4.569	1906.71	32	9.51776e+08	9.46557e+08	9.42611e+08	1.14178e+09	1.11944e+09	1.05073e+09	8.83976e+08	9.00572e+08	8.69841e+08	9.59007e+08	9.44596e+08	9.22248e+08	9.46981e+08	1	1.10398e+09	1	8.84796e+08	1	9.4195e+08	1	0.857789	0.00466983	0.939324	0.0147109
Bo1g141210.1	Clathrin heavy chain	pep chromosome:v2.1:C1:40384633:40392898:1 gene:Bo1g141210 transcript:Bo1g141210.1 gene_biotype:protein_coding transcript_biotype:protein_coding description:Clathrin heavy chain :UniProtKB/TrEMBL;Acc:A0A0D3AEI6]	35.208	54	682	2	1	1707	193.3	5.36	Not Found	Not Found	Not Found	Not Found	Not Found	Not Found	Not Found	High	Not Found	High	Not Found	Not Found	2.505	1892.9	54	NA	NA	NA	NA	NA	NA	NA	NA	NA	1.27331e+07	NA	NA	NA	0	NA	0	NA	0	1.27331e+07	0.333333	NA	NA	NA	NA
Bo7g027890.1	Aconitate hydratase	pep chromosome:v2.1:C7:9982935:9987557:-1 gene:Bo7g027890 transcript:Bo7g027890.1 gene_biotype:protein_coding transcript_biotype:protein_coding description:Aconitate hydratase :UniProtKB/TrEMBL;Acc:A0A0D3D4E9]	43.0598	33	679	7	1	987	107.6	7.27	High	High	High	High	High	High	High	High	High	High	High	High	3.281	1878.65	33	6.57073e+07	5.34643e+07	7.84699e+07	9.77816e+07	9.61131e+07	9.28431e+07	1.10729e+08	6.71654e+07	6.39411e+07	5.18535e+07	5.9874e+07	6.10686e+07	6.58805e+07	1	9.55793e+07	1	8.06119e+07	1	5.75987e+07	1	0.689276	0.0156898	1.39954	0.208484
Bo1g049470.1	SPFH/Band 7/PHB domain-containing membrane-associated protein family	pep chromosome:v2.1:C1:14049567:14051986:-1 gene:Bo1g049470 transcript:Bo1g049470.1 gene_biotype:protein_coding transcript_biotype:protein_coding description:SPFH/Band 7/PHB domain-containing membrane-associated protein family :TAIR;Acc:AT4G27585](projected from arabidopsis_thaliana,AT4G27585)	65.5779	25	730	15	1	398	43.6	7.25	High	High	High	High	High	High	High	High	High	High	High	High	9.661	1877.91	25	6.68622e+08	6.46746e+08	6.40953e+08	7.42703e+08	7.68194e+08	7.31808e+08	6.83033e+08	6.83431e+08	7.45505e+08	8.93862e+08	9.21316e+08	9.0947e+08	6.52107e+08	1	7.47568e+08	1	7.0399e+08	1	9.08216e+08	1	0.872304	0.00221994	0.775135	0.000779448
Bo4g061410.1	Tubulin beta chain	pep chromosome:v2.1:C4:13811707:13813764:1 gene:Bo4g061410 transcript:Bo4g061410.1 gene_biotype:protein_coding transcript_biotype:protein_coding description:Tubulin beta chain :UniProtKB/TrEMBL;Acc:A0A0D3BTT7]	55.7173	22	666	1	1	481	53.9	4.87	Not Found	Not Found	High	Not Found	Not Found	Not Found	Not Found	High	High	High	High	High	21.758	1877.56	22	NA	NA	9.53961e+07	NA	NA	NA	NA	1.36668e+08	1.35345e+08	1.40214e+08	1.42255e+08	1.42318e+08	9.53961e+07	0.333333	NA	0	1.36006e+08	0.666667	1.41595e+08	1	NA	NA	0.960527	0.0119234
Bo9g014740.1		pep chromosome:v2.1:C9:4517798:4520864:-1 gene:Bo9g014740 transcript:Bo9g014740.1 gene_biotype:protein_coding transcript_biotype:protein_coding	38.5737	24	692	4	1	617	70.5	5.05	High	High	High	High	High	High	High	High	High	High	High	High	3.715	1875.18	24	5.85782e+08	5.67836e+08	5.86512e+08	6.54099e+08	6.61239e+08	6.65116e+08	4.74486e+08	3.08292e+08	4.84092e+08	4.35023e+08	3.86612e+08	3.89642e+08	5.80043e+08	1	6.60151e+08	1	4.2229e+08	1	4.03759e+08	1	0.878652	0.000315769	1.0459	0.769812
Bo1g040350.1		pep chromosome:v2.1:C1:12583171:12585436:1 gene:Bo1g040350 transcript:Bo1g040350.1 gene_biotype:protein_coding transcript_biotype:protein_coding	60.0551	21	653	7	1	363	38.7	10.27	High	High	High	High	High	High	High	High	High	High	High	High	9.746	1869.2	21	9.98703e+08	1.08091e+09	1.21826e+09	1.20402e+09	1.20788e+09	1.13909e+09	1.33642e+09	1.31419e+09	1245938921	1.2328e+09	1.34473e+09	1.31441e+09	1.09929e+09	1	1.18366e+09	1	1.29885e+09	1	1.29731e+09	1	0.928723	0.281428	1.00119	0.973226
Bo1g002670.1	Coatomer subunit alpha	pep chromosome:v2.1:C1:327846:332013:1 gene:Bo1g002670 transcript:Bo1g002670.1 gene_biotype:protein_coding transcript_biotype:protein_coding description:Coatomer subunit alpha :UniProtKB/TrEMBL;Acc:A0A0D3A0Z0]	51.5971	53	661	4	1	1221	136.8	6.9	High	High	High	High	High	High	High	High	High	High	High	High	4.395	1868.06	53	6.00179e+07	5.54673e+07	5.3623e+07	4.27487e+07	5.0186e+07	4.92979e+07	4.82926e+07	5.92384e+07	5.50304e+07	4.87394e+07	5.30682e+07	4.30258e+07	5.63694e+07	1	4.74109e+07	1	5.41872e+07	1	4.82778e+07	1	1.18895	0.0412278	1.1224	0.2427
Bo1g037680.1		pep chromosome:v2.1:C1:11518350:11522030:-1 gene:Bo1g037680 transcript:Bo1g037680.1 gene_biotype:protein_coding transcript_biotype:protein_coding	39.4161	35	746	3	1	822	94.1	5.05	High	High	High	High	High	High	High	High	High	High	High	High	3.365	1862.86	35	2.41828e+08	2.45544e+08	2.49042e+08	2.90343e+08	1.90803e+08	2.60707e+08	2.46236e+08	2.31654e+08	2.51624e+08	3.0278e+08	2.47247e+08	2.9165e+08	2.45472e+08	1	2.47284e+08	1	2.43172e+08	1	2.80559e+08	1	0.992669	0.954076	0.866739	0.106113
Bo5g025070.1		pep chromosome:v2.1:C5:8637092:8638454:1 gene:Bo5g025070 transcript:Bo5g025070.1 gene_biotype:protein_coding transcript_biotype:protein_coding	65.5488	20	605	3	1	328	35.8	7.69	High	High	High	High	High	High	High	High	High	High	High	High	14.571	1849.78	20	3.51181e+08	3.56325e+08	3.69388e+08	3.45564e+08	3.48602e+08	3.34313e+08	2.97643e+08	2.94493e+08	2.87676e+08	3.60604e+08	3.49501e+08	3.37281e+08	3.58964e+08	1	3.42826e+08	1	2.93271e+08	1	3.49129e+08	1	1.04707	0.0808585	0.840007	0.00160833
Bo3g017710.1		pep chromosome:v2.1:C3:5807953:5808642:1 gene:Bo3g017710 transcript:Bo3g017710.1 gene_biotype:protein_coding transcript_biotype:protein_coding	68.4615	9	718	1	1	130	14.8	9.94	High	High	High	High	High	High	High	High	High	High	High	High	6.197	1831.49	9	1.48491e+09	1.45732e+09	1.32486e+09	1.322e+09	1.29024e+09	1.29054e+09	1.2882e+09	1.22642e+09	1144357580	1.32497e+09	1.27395e+09	1.32508e+09	1.42236e+09	1	1.30093e+09	1	1.21966e+09	1	1.308e+09	1	1.09334	0.0740196	0.932462	0.121161
Bo8g112900.1	RPS15A description	pep chromosome:v2.1:C8:40057756:40058347:-1 gene:Bo8g112900 transcript:Bo8g112900.1 gene_biotype:protein_coding transcript_biotype:protein_coding gene_symbol:RPS15A description:ribosomal protein S15A :TAIR;Acc:AT1G07770](projected from arabidopsis_thaliana,AT1G07770)	68.4615	9	704	1	1	130	14.8	9.89	High	High	High	High	High	High	High	High	High	High	High	High	6.197	1807.19	9	7.56619e+08	6.93001e+08	8.06081e+08	7.04002e+08	6.53854e+08	7.11506e+08	7.02513e+08	6.5482e+08	6.58166e+08	8.40797e+08	7.73805e+08	7.64277e+08	7.51901e+08	1	6.89788e+08	1	6.71833e+08	1	7.9296e+08	1	1.09005	0.172081	0.847247	0.0132585
Bo5g008450.1		pep chromosome:v2.1:C5:2867244:2868572:1 gene:Bo5g008450 transcript:Bo5g008450.1 gene_biotype:protein_coding transcript_biotype:protein_coding	52.2472	19	747	11	1	356	38.6	5.73	High	High	High	High	High	High	High	High	High	High	High	High	6.279	1791.87	19	2.63057e+09	2.5377e+09	2.51353e+09	2.49797e+09	2.41314e+09	2.42386e+09	2.03241e+09	1.97259e+09	1893483079	2.79489e+09	2.65384e+09	2.75936e+09	2.5606e+09	1	2.44499e+09	1	1.96616e+09	1	2.73603e+09	1	1.04728	0.0603371	0.718618	0.000191484
Bo9g113920.1		pep chromosome:v2.1:C9:36672278:36674484:-1 gene:Bo9g113920 transcript:Bo9g113920.1 gene_biotype:protein_coding transcript_biotype:protein_coding	58.2873	20	686	2	1	362	39.5	8.98	High	High	High	High	High	High	High	High	High	High	High	High	9.771	1789.6	20	7.73299e+07	9.11636e+07	8.47848e+07	1.05017e+08	1.11165e+08	1.12164e+08	9.50551e+07	1.01054e+08	103018379	8.75651e+07	1.03121e+08	1.01686e+08	8.44261e+07	1	1.09449e+08	1	9.97092e+07	1	9.74575e+07	1	0.771375	0.00545629	1.0231	0.703778
Bo3g151300.1		pep chromosome:v2.1:C3:53819613:53823943:1 gene:Bo3g151300 transcript:Bo3g151300.1 gene_biotype:protein_coding transcript_biotype:protein_coding	48.3474	51	640	8	1	1301	146	7.06	High	High	High	High	High	High	High	High	High	High	High	High	3.408	1783.56	51	3.48271e+07	6.98037e+07	4.86522e+07	5.7887e+07	3.08365e+07	3.22639e+07	6.49202e+07	5.00115e+07	4.52316e+07	3.23834e+07	4.25912e+07	3.53688e+07	5.10943e+07	1	4.03291e+07	1	5.33878e+07	1	3.67812e+07	1	1.26693	0.468069	1.4515	0.0671922
Bo2g109310.1		pep chromosome:v2.1:C2:33054625:33055557:1 gene:Bo2g109310 transcript:Bo2g109310.1 gene_biotype:protein_coding transcript_biotype:protein_coding	65.9794	12	748	1	1	194	21.8	9.5	High	High	High	High	High	High	High	High	High	High	High	High	11.915	1780.13	12	2.94486e+08	3.06604e+08	2.9141e+08	2.55246e+08	2.58726e+08	2.64244e+08	2.24749e+08	2.4799e+08	2.95529e+08	2.62443e+08	2.60799e+08	2.81999e+08	2.975e+08	1	2.59405e+08	1	2.56089e+08	1	2.68414e+08	1	1.14685	0.0020225	0.954084	0.603872
Bo2g009550.1		pep chromosome:v2.1:C2:2011586:2012968:1 gene:Bo2g009550 transcript:Bo2g009550.1 gene_biotype:protein_coding transcript_biotype:protein_coding	64.9867	19	607	2	1	377	41.7	5.49	High	High	High	High	High	High	High	High	High	High	Not Found	High	25.49	1775.84	19	5.82937e+07	6.2108e+07	6.65194e+07	6.01989e+07	4.85565e+07	6.99112e+07	4.43563e+07	4.73998e+07	37843382	6.35118e+07	NA	6.93402e+07	6.2307e+07	1	5.95556e+07	1	4.31998e+07	1	6.6426e+07	0.666667	1.0462	0.698783	0.650345	0.0119462
Bo3g005200.1		pep chromosome:v2.1:C3:1998371:2001164:1 gene:Bo3g005200 transcript:Bo3g005200.1 gene_biotype:protein_coding transcript_biotype:protein_coding	46.2555	29	657	18	1	681	72.7	5.92	High	High	High	High	High	High	High	High	High	High	High	High	3.894	1771.89	29	2.37084e+08	2.29455e+08	2.9762e+08	4.06259e+08	8.32432e+08	4.37015e+08	2.61845e+08	7.20926e+08	2.86059e+08	2.3937e+08	2.31759e+08	2.35029e+08	2.5472e+08	1	5.58568e+08	1	4.22943e+08	1	2.35386e+08	1	0.456022	0.0939553	1.79681	0.27704
Bo9g059980.1	FAD-binding Berberine family protein	pep chromosome:v2.1:C9:18260044:18261844:-1 gene:Bo9g059980 transcript:Bo9g059980.1 gene_biotype:protein_coding transcript_biotype:protein_coding description:FAD-binding Berberine family protein :TAIR;Acc:AT5G44400](projected from arabidopsis_thaliana,AT5G44400)	53.0387	30	673	30	1	543	60.6	9.74	High	High	High	High	High	High	High	High	High	High	High	High	8.512	1770.49	30	1.05557e+09	1.09399e+09	1.12626e+09	4.77742e+08	4.8846e+08	4.55475e+08	3.65823e+08	3.8968e+08	4.02209e+08	5.94989e+08	5.67576e+08	5.51677e+08	1.09194e+09	1	4.73892e+08	1	3.85904e+08	1	5.71414e+08	1	2.3042	1.06779e-05	0.675348	0.000360718
Bo8g111020.1		pep chromosome:v2.1:C8:39576792:39578980:-1 gene:Bo8g111020 transcript:Bo8g111020.1 gene_biotype:protein_coding transcript_biotype:protein_coding	43.8554	16	576	6	1	415	46.5	5.85	High	High	High	High	High	High	High	High	High	High	High	High	6.128	1762.68	16	6.14122e+08	6.11278e+08	6.0437e+08	6.81763e+08	6.52801e+08	6.67749e+08	6.84017e+08	7.15923e+08	7.46952e+08	6.31495e+08	6.48024e+08	6.58216e+08	6.09923e+08	1	6.67438e+08	1	7.15631e+08	1	6.45911e+08	1	0.913829	0.0028909	1.10794	0.0242923
Bo2g086540.1	ATA27 description	pep chromosome:v2.1:C2:23985375:23988391:1 gene:Bo2g086540 transcript:Bo2g086540.1 gene_biotype:protein_coding transcript_biotype:protein_coding gene_symbol:ATA27 description:Glycosyl hydrolase superfamily protein :TAIR;Acc:AT1G75940](projected from arabidopsis_thaliana,AT1G75940)	42.1818	20	641	20	1	550	63.9	5.97	High	High	High	High	High	High	High	High	High	High	High	High	5.543	1748.07	20	7.34668e+08	7.38991e+08	7.44476e+08	6.10917e+08	5.98018e+08	5.61615e+08	7.55227e+08	7.91705e+08	7.95081e+08	9.67328e+08	8.89158e+08	9.81714e+08	7.39378e+08	1	5.90183e+08	1	7.80671e+08	1	9.46067e+08	1	1.25279	0.000578572	0.825176	0.00626565
Bo3g040370.1		pep chromosome:v2.1:C3:16562799:16564820:-1 gene:Bo3g040370 transcript:Bo3g040370.1 gene_biotype:protein_coding transcript_biotype:protein_coding	63.7201	30	604	6	1	543	57.3	4.89	High	High	High	High	High	High	High	High	High	High	High	High	6.602	1726.98	30	5.15369e+08	3.22708e+08	5.0555e+08	6.00846e+08	6.10928e+08	5.66519e+08	4.67298e+08	4.71531e+08	4.52139e+08	5.93159e+08	5.85343e+08	5.8858e+08	4.47876e+08	1	5.92764e+08	1	4.63656e+08	1	5.89027e+08	1	0.755571	0.0865586	0.787156	3.78149e-05
Bo9g088340.1		pep chromosome:v2.1:C9:27224969:27225726:-1 gene:Bo9g088340 transcript:Bo9g088340.1 gene_biotype:protein_coding transcript_biotype:protein_coding	65.9794	12	736	1	1	194	21.8	9.58	High	High	High	High	High	Not Found	Not Found	Not Found	High	Not Found	Not Found	Not Found	16.191	1726.53	12	2.86705e+08	2.77234e+08	5.73646e+07	2.0906e+08	2.31252e+08	NA	NA	NA	266326100	NA	NA	NA	2.07101e+08	1	2.20156e+08	0.666667	266326100	0.333333	NA	0	0.940703	0.901535	NA	NA
Bo9g126040.1		pep chromosome:v2.1:C9:39549504:39552014:1 gene:Bo9g126040 transcript:Bo9g126040.1 gene_biotype:protein_coding transcript_biotype:protein_coding	56.9061	32	629	5	1	543	57.7	7.74	High	High	High	High	High	High	High	High	High	High	High	High	5.551	1725.13	32	7.97891e+07	8.66892e+07	9.73093e+07	1.07603e+08	8.75558e+07	8.42666e+07	1.55255e+08	1.37873e+08	1.51816e+08	1.68828e+08	1.68254e+08	1.44015e+08	8.79292e+07	1	9.31417e+07	1	1.48315e+08	1	1.60366e+08	1	0.944037	0.589401	0.924852	0.284171
Bo9g149770.1	Calcium-dependent phosphotriesterase superfamily protein	pep chromosome:v2.1:C9:44405432:44407251:1 gene:Bo9g149770 transcript:Bo9g149770.1 gene_biotype:protein_coding transcript_biotype:protein_coding description:Calcium-dependent phosphotriesterase superfamily protein :TAIR;Acc:AT5G22020](projected from arabidopsis_thaliana,AT5G22020)	56.962	20	546	18	1	395	44.1	6.65	High	High	High	High	High	High	High	High	High	High	High	High	24.119	1716.7	20	1.01985e+09	1.01108e+09	1.11801e+09	1.07243e+09	1.12619e+09	1.13812e+09	1.10164e+09	1.02908e+09	1128524640	1.21359e+09	1.20597e+09	1.10651e+09	1.04965e+09	1	1.11225e+09	1	1.08642e+09	1	1.17536e+09	1	0.943717	0.190742	0.924328	0.122396
Bo8g117230.1		pep chromosome:v2.1:C8:41174839:41177891:-1 gene:Bo8g117230 transcript:Bo8g117230.1 gene_biotype:protein_coding transcript_biotype:protein_coding	55.4201	39	605	30	1	738	85.7	7.37	High	High	High	High	High	High	High	High	High	High	High	High	6.774	1693.78	39	2.4452e+08	2.46749e+08	2.50928e+08	2.42992e+08	2.52564e+08	2.66557e+08	3.69217e+08	3.75757e+08	3.73826e+08	2.73841e+08	2.57739e+08	2.69344e+08	2.47399e+08	1	2.54038e+08	1	3.72934e+08	1	2.66974e+08	1	0.973868	0.40245	1.39689	3.35827e-05
Bo7g110460.1		pep chromosome:v2.1:C7:43800375:43802421:1 gene:Bo7g110460 transcript:Bo7g110460.1 gene_biotype:protein_coding transcript_biotype:protein_coding	68.932	19	564	1	1	309	32.9	10.11	High	High	High	High	High	High	High	High	High	High	High	High	13.454	1679.97	19	9.41809e+07	1.02389e+08	8.87199e+07	7.486e+07	7.64247e+07	7.6692e+07	5.60314e+07	6.65694e+07	79448390	8.32655e+07	7.73298e+07	8.94025e+07	9.50965e+07	1	7.59922e+07	1	6.73497e+07	1	8.33326e+07	1	1.2514	0.00890276	0.808204	0.103801
Bo4g115390.1		pep chromosome:v2.1:C4:29259521:29262682:-1 gene:Bo4g115390 transcript:Bo4g115390.1 gene_biotype:protein_coding transcript_biotype:protein_coding	53.8084	35	618	10	1	814	90	5.35	High	High	High	High	High	High	High	High	High	High	High	High	4.673	1676.39	35	1.04725e+08	1.28929e+08	9.76586e+07	1.32761e+08	1.28538e+08	1.18515e+08	9.62395e+07	9.73969e+07	1.13394e+08	8.56437e+07	8.78119e+07	8.15571e+07	1.10438e+08	1	1.26605e+08	1	1.02344e+08	1	8.50042e+07	1	0.8723	0.193916	1.20398	0.0410017
Bo4g164970.1		pep chromosome:v2.1:C4:44204962:44211045:1 gene:Bo4g164970 transcript:Bo4g164970.1 gene_biotype:protein_coding transcript_biotype:protein_coding	49.1718	27	583	3	1	966	102.5	5.33	High	High	High	High	High	High	High	High	High	High	High	High	1.88	1673.39	27	2.2887e+08	2.64393e+08	2.51587e+08	3.05967e+08	2.89652e+08	3.05139e+08	1.89669e+08	1.98214e+08	1.88152e+08	2.7343e+08	2.72298e+08	2.67103e+08	2.48284e+08	1	3.00253e+08	1	1.92012e+08	1	2.70944e+08	1	0.826915	0.0111976	0.708677	2.81921e-05
Bo3g005290.1	ACT7 description	pep chromosome:v2.1:C3:2034081:2035458:1 gene:Bo3g005290 transcript:Bo3g005290.1 gene_biotype:protein_coding transcript_biotype:protein_coding gene_symbol:ACT7 description:actin 7 :TAIR;Acc:AT5G09810](projected from arabidopsis_thaliana,AT5G09810)	60.7427	18	579	1	1	377	41.7	5.49	Not Found	High	High	Not Found	High	High	Not Found	High	Not Found	High	High	Not Found	21.19	1666	18	NA	8.12539e+07	8.57223e+07	NA	7.08858e+07	8.20049e+07	NA	4.96721e+07	NA	7.56468e+07	6.97644e+07	NA	8.34881e+07	0.666667	7.64454e+07	0.666667	4.96721e+07	0.333333	7.27056e+07	0.666667	1.09213	0.360812	0.683195	NA
Bo4g166650.1		pep chromosome:v2.1:C4:44732681:44733959:-1 gene:Bo4g166650 transcript:Bo4g166650.1 gene_biotype:protein_coding transcript_biotype:protein_coding	50	17	673	3	1	356	38.4	6.43	High	High	High	High	High	High	High	High	High	High	High	High	6.11	1657.54	17	1.12292e+08	1.16835e+08	3.63774e+08	5.89049e+07	1.14672e+08	1.17112e+08	9.4761e+07	2.46914e+08	2.44629e+08	2.82428e+08	2.68823e+08	2.63662e+08	1.97634e+08	1	9.6896e+07	1	1.95435e+08	1	2.71637e+08	1	2.03965	0.302677	0.719469	0.206908
Bo8g077330.1		pep chromosome:v2.1:C8:25355757:25359261:-1 gene:Bo8g077330 transcript:Bo8g077330.1 gene_biotype:protein_coding transcript_biotype:protein_coding	48.927	39	602	11	1	932	103.4	6.47	High	High	High	High	High	High	High	High	High	High	High	High	2.875	1656.06	39	1.68748e+08	1.86707e+08	1.79615e+08	2.00008e+08	2.08293e+08	2.03624e+08	1.96497e+08	2.16777e+08	2.36722e+08	1.9973e+08	1.91134e+08	2.22493e+08	1.78357e+08	1	2.03975e+08	1	2.16665e+08	1	2.04452e+08	1	0.874404	0.0111776	1.05974	0.458757
Bo3g109360.1		pep chromosome:v2.1:C3:38898174:38900565:1 gene:Bo3g109360 transcript:Bo3g109360.1 gene_biotype:protein_coding transcript_biotype:protein_coding	43.6911	23	566	7	1	531	60.4	4.88	High	High	High	High	High	High	High	High	High	High	High	High	5.31	1646	23	4.11347e+08	4.29128e+08	4.23278e+08	4.28559e+08	4.06148e+08	4.28159e+08	3.43031e+08	3.3073e+08	3.49035e+08	4.08628e+08	4.11795e+08	4.13394e+08	4.21251e+08	1	4.20955e+08	1	3.40932e+08	1	4.11273e+08	1	1.0007	0.975516	0.828968	0.000225787
Bo8g050920.1		pep chromosome:v2.1:C8:16906195:16908072:1 gene:Bo8g050920 transcript:Bo8g050920.1 gene_biotype:protein_coding transcript_biotype:protein_coding	66.5625	18	550	4	1	320	33.5	10.17	High	High	High	High	High	High	High	High	High	High	High	High	10.938	1632.3	18	2.55331e+08	2.51033e+08	2.45652e+08	2.40154e+08	2.25819e+08	2.38137e+08	3.03005e+08	2.65442e+08	2.9509e+08	2.63982e+08	2.65662e+08	2.53252e+08	2.50672e+08	1	2.34704e+08	1	2.87846e+08	1	2.60966e+08	1	1.06804	0.0390649	1.103	0.0900059
Bo7g109380.1		pep chromosome:v2.1:C7:43299591:43303109:-1 gene:Bo7g109380 transcript:Bo7g109380.1 gene_biotype:protein_coding transcript_biotype:protein_coding	38.1531	33	685	1	1	823	94.1	5.07	High	High	High	High	High	High	High	Not Found	High	High	High	High	2.981	1632.01	33	NA	1.56544e+07	5.13993e+07	1.49526e+07	4.69429e+07	5.39577e+07	2.34885e+07	NA	1.97849e+07	6.64552e+07	3.28409e+07	6.54776e+07	3.35269e+07	0.666667	3.86177e+07	1	2.16367e+07	0.666667	5.49246e+07	1	0.868173	0.819358	0.393935	0.10275
Bo9g019110.1		pep chromosome:v2.1:C9:6113483:6115059:-1 gene:Bo9g019110 transcript:Bo9g019110.1 gene_biotype:protein_coding transcript_biotype:protein_coding	47.4638	15	549	9	1	276	29.5	9	High	High	High	High	High	High	High	High	High	High	High	High	12.689	1623.37	15	7.55546e+08	7.85128e+08	7.85572e+08	9.3168e+08	9.20652e+08	9.29235e+08	8.38592e+08	8.67775e+08	8.60679e+08	1.02327e+09	9.92352e+08	1.03593e+09	7.75416e+08	1	9.27189e+08	1	8.55682e+08	1	1.01718e+09	1	0.836308	0.00013233	0.841226	0.000496794
Bo8g114690.1		pep chromosome:v2.1:C8:40402332:40406151:-1 gene:Bo8g114690 transcript:Bo8g114690.1 gene_biotype:protein_coding transcript_biotype:protein_coding	44.3883	42	613	3	1	989	110.6	5.11	High	High	High	High	High	High	High	High	High	High	High	High	5.48	1607.62	42	7.15908e+07	7.53736e+07	7.76209e+07	7.68086e+07	8.07055e+07	7.0937e+07	1.22733e+08	9.45653e+07	1.18288e+08	1.16934e+08	1.12692e+08	1.14465e+08	7.48617e+07	1	7.61504e+07	1	1.11862e+08	1	1.14697e+08	1	0.983077	0.719272	0.975282	0.764213
Bo3g024330.1		pep chromosome:v2.1:C3:9058642:9063017:-1 gene:Bo3g024330 transcript:Bo3g024330.1 gene_biotype:protein_coding transcript_biotype:protein_coding	42.365	38	590	9	1	1074	119.1	5.31	High	High	High	High	High	High	High	High	High	High	High	High	2.981	1602.74	38	7.86174e+07	7.75299e+07	9.07502e+07	1.00285e+08	1.04687e+08	9.73431e+07	7.76237e+07	7.81165e+07	7.17527e+07	7.44919e+07	5.57448e+07	7.20045e+07	8.22992e+07	1	1.00772e+08	1	7.5831e+07	1	6.74137e+07	1	0.81669	0.0176347	1.12486	0.247634
Bo8g104530.1		pep chromosome:v2.1:C8:36667261:36668685:-1 gene:Bo8g104530 transcript:Bo8g104530.1 gene_biotype:protein_coding transcript_biotype:protein_coding	60.2446	19	507	4	1	327	35.5	7.94	High	High	High	High	High	High	High	High	High	High	High	High	10.938	1598.99	19	3.5408e+08	3.45266e+08	3.48524e+08	3.23978e+08	3.15786e+08	3.14452e+08	2.81726e+08	2.63632e+08	258772603	2.93866e+08	3.04484e+08	3.03855e+08	3.4929e+08	1	3.18072e+08	1	2.68043e+08	1	3.00735e+08	1	1.09815	0.00136757	0.891295	0.0137006
Bo5g010060.1		pep chromosome:v2.1:C5:3757861:3760080:1 gene:Bo5g010060 transcript:Bo5g010060.1 gene_biotype:protein_coding transcript_biotype:protein_coding	42.3729	15	529	5	1	413	46.3	5.71	High	High	High	High	High	High	High	High	High	High	High	High	5.579	1596.84	15	1.6716e+08	1.82595e+08	1.82048e+08	2.18041e+08	2.2514e+08	2.15644e+08	1.82416e+08	2.09724e+08	2.0696e+08	1.7918e+08	1.80916e+08	1.8258e+08	1.77268e+08	1	2.19608e+08	1	1.997e+08	1	1.80892e+08	1	0.8072	0.00187821	1.10397	0.0976024
Bo7g093400.1		pep chromosome:v2.1:C7:35919324:35921562:1 gene:Bo7g093400 transcript:Bo7g093400.1 gene_biotype:protein_coding transcript_biotype:protein_coding	53.9179	23	526	11	1	536	58.7	9.14	High	High	High	High	High	High	High	High	High	High	High	High	4.259	1571.12	23	3.02884e+08	3.26916e+08	3.28665e+08	3.73985e+08	3.77798e+08	3.74035e+08	3.92187e+08	4.06589e+08	4.13675e+08	4.13048e+08	3.86877e+08	4.09862e+08	3.19488e+08	1	3.75272e+08	1	4.0415e+08	1	4.03262e+08	1	0.85135	0.00268388	1.0022	0.935987
Bo00673s020.1		pep scaffold:v2.1:Scaffold00673:26889:27968:-1 gene:Bo00673s020 transcript:Bo00673s020.1 gene_biotype:protein_coding transcript_biotype:protein_coding	38.1616	12	572	11	1	359	39.3	8.47	High	High	High	High	High	High	High	High	High	High	High	High	4.623	1568.61	12	2.59143e+09	2.37436e+09	2.38917e+09	2.61628e+09	2.54825e+09	2.69276e+09	2.51014e+09	2.49835e+09	2258762682	2.7432e+09	2.6288e+09	2.60432e+09	2.45165e+09	1	2.6191e+09	1	2.42242e+09	1	2.65878e+09	1	0.936067	0.109173	0.911103	0.0627897
Bo8g006000.1		pep chromosome:v2.1:C8:1314687:1318532:1 gene:Bo8g006000 transcript:Bo8g006000.1 gene_biotype:protein_coding transcript_biotype:protein_coding	46.9098	43	590	4	1	987	110.4	5.11	High	High	High	Not Found	Not Found	High	High	High	High	High	High	High	5.739	1567.04	43	1.88727e+07	3.12892e+07	3.29154e+07	NA	NA	3.73363e+07	1.94077e+08	1.06205e+08	1.33337e+08	8.81266e+07	7.34397e+07	9.13469e+07	2.76924e+07	1	3.73363e+07	0.333333	1.4454e+08	1	8.43044e+07	1	0.741702	NA	1.7145	0.0858912
Bo3g096450.1		pep chromosome:v2.1:C3:34852691:34854262:1 gene:Bo3g096450 transcript:Bo3g096450.1 gene_biotype:protein_coding transcript_biotype:protein_coding	64.1304	17	546	10	1	276	29.4	9	High	High	High	High	High	High	High	High	High	High	High	High	28.936	1556.26	17	5.66636e+08	5.59995e+08	5.95168e+08	6.35088e+08	6.36996e+08	6.77568e+08	5.1708e+08	4.89967e+08	5.24324e+08	5.85566e+08	6.05595e+08	5.91015e+08	5.73933e+08	1	6.49884e+08	1	5.10457e+08	1	5.94059e+08	1	0.883132	0.0123934	0.85927	0.00226301
Bo6g049550.1		pep chromosome:v2.1:C6:13614383:13615498:-1 gene:Bo6g049550 transcript:Bo6g049550.1 gene_biotype:protein_coding transcript_biotype:protein_coding	60.3093	12	514	7	1	194	22	9.55	High	High	High	High	High	High	High	High	High	High	High	High	18.684	1554.49	12	1.22492e+09	1.57999e+09	1.6541e+09	1.29106e+09	1.30633e+09	1.29244e+09	1.41956e+09	1.61699e+09	1521068159	1.54325e+09	1.56064e+09	1.69335e+09	1.48634e+09	1	1.29661e+09	1	1.51921e+09	1	1.59908e+09	1	1.14633	0.225543	0.950051	0.341947
Bo1g153420.1		pep chromosome:v2.1:C1:42858540:42861395:-1 gene:Bo1g153420 transcript:Bo1g153420.1 gene_biotype:protein_coding transcript_biotype:protein_coding	55.8824	27	567	3	1	544	58.4	5.35	High	High	High	High	High	High	High	High	High	High	High	High	4.623	1545.16	27	1.62345e+08	1.33968e+08	8.80193e+07	1.83843e+08	1.01492e+08	1.52151e+08	8.32378e+07	9.25427e+07	1.01433e+08	1.22103e+08	2.11828e+08	2.2652e+08	1.28111e+08	1	1.45829e+08	1	9.24045e+07	1	1.86817e+08	1	0.878502	0.612627	0.494626	0.046101
Bo4g154510.1	40S ribosomal protein SA	pep chromosome:v2.1:C4:42398077:42399369:1 gene:Bo4g154510 transcript:Bo4g154510.1 gene_biotype:protein_coding transcript_biotype:protein_coding description:40S ribosomal protein SA :UniProtKB/TrEMBL;Acc:A0A0D3C1R3]	48.9726	12	632	12	1	292	32.1	5.25	High	High	High	High	High	High	High	High	High	High	High	High	12.895	1538.41	12	5.09205e+09	4.99546e+09	4.89474e+09	4.26158e+09	4.32794e+09	4.38443e+09	5.17844e+09	5.04637e+09	5076310256	5.13772e+09	4.91679e+09	5.02808e+09	4.99408e+09	1	4.32465e+09	1	5.10037e+09	1	5.02753e+09	1	1.15479	0.000567792	1.01449	0.387992
Bo3g032460.1		pep chromosome:v2.1:C3:12456132:12458716:1 gene:Bo3g032460 transcript:Bo3g032460.1 gene_biotype:protein_coding transcript_biotype:protein_coding	55.7895	21	470	12	1	475	51.7	7.31	High	High	High	High	High	High	High	High	High	High	High	High	12.594	1538.06	21	4.53944e+08	5.61123e+08	5.98594e+08	4.6662e+08	4.93814e+08	4.97358e+08	4.11252e+08	4.29517e+08	4.40224e+08	4.54408e+08	4.26829e+08	4.57765e+08	5.37887e+08	1	4.85931e+08	1	4.26998e+08	1	4.46334e+08	1	1.10692	0.307052	0.956678	0.209569
Bo4g069290.1		pep chromosome:v2.1:C4:14738760:14740063:1 gene:Bo4g069290 transcript:Bo4g069290.1 gene_biotype:protein_coding transcript_biotype:protein_coding	49.7191	18	657	3	1	356	38.3	6.19	High	High	High	High	High	High	High	High	High	High	High	High	5.629	1529.39	18	2.09196e+08	2.07094e+08	2.27435e+08	2.5426e+08	2.55969e+08	2.42634e+08	2.84842e+07	2.46798e+08	2.23343e+08	3.09321e+08	3.37537e+08	3.2131e+08	2.14575e+08	1	2.50954e+08	1	1.66208e+08	1	3.22723e+08	1	0.855038	0.00913422	0.515018	0.0880012
Bo8g099360.1	HSP98.7 description	pep chromosome:v2.1:C8:34209688:34213452:1 gene:Bo8g099360 transcript:Bo8g099360.1 gene_biotype:protein_coding transcript_biotype:protein_coding gene_symbol:HSP98.7 description:casein lytic proteinase B4 :TAIR;Acc:AT2G25140](projected from arabidopsis_thaliana,AT2G25140)	48.3042	44	583	37	1	973	109.2	6.65	High	High	High	High	High	High	High	High	High	High	High	High	3.725	1516.64	44	2.35704e+08	2.19917e+08	2.2709e+08	3.7924e+08	3.77675e+08	3.91017e+08	3.3573e+08	3.34681e+08	3.33708e+08	2.85412e+08	2.78276e+08	2.68145e+08	2.2757e+08	1	3.82644e+08	1	3.34707e+08	1	2.77278e+08	1	0.594732	1.52593e-05	1.20712	0.000339223
Bo3g022630.1	GLT1 description	pep chromosome:v2.1:C3:7873319:7882214:-1 gene:Bo3g022630 transcript:Bo3g022630.1 gene_biotype:protein_coding transcript_biotype:protein_coding gene_symbol:GLT1 description:NADH-dependent glutamate synthase 1 :TAIR;Acc:AT5G53460](projected from arabidopsis_thaliana,AT5G53460)	35.9056	64	558	64	1	2203	240.8	6.43	High	High	High	High	High	High	High	High	High	High	High	High	1.6	1516.47	64	2.4056e+08	4.25159e+08	2.57481e+08	1.92263e+08	2.05027e+08	1.61632e+08	2.21961e+08	2.32085e+08	2.27733e+08	2.11537e+08	1.40173e+08	1.45699e+08	3.07733e+08	1	1.86307e+08	1	2.2726e+08	1	1.65803e+08	1	1.65175	0.114344	1.37066	0.0564274
Bo9g010190.1		pep chromosome:v2.1:C9:2933956:2936034:1 gene:Bo9g010190 transcript:Bo9g010190.1 gene_biotype:protein_coding transcript_biotype:protein_coding	61.194	27	515	15	1	536	59.1	9.1	High	High	High	High	High	High	High	High	High	High	High	High	5.244	1513.68	27	3.65287e+08	3.50346e+08	3.6913e+08	4.20467e+08	3.81138e+08	4.12555e+08	4.26084e+08	4.21854e+08	4.05562e+08	4.24644e+08	4.10705e+08	4.03907e+08	3.61588e+08	1	4.0472e+08	1	4.17833e+08	1	4.13085e+08	1	0.893427	0.0316329	1.01149	0.615827
Bo1g157470.1		pep chromosome:v2.1:C1:43421310:43423133:-1 gene:Bo1g157470 transcript:Bo1g157470.1 gene_biotype:protein_coding transcript_biotype:protein_coding	68.3473	19	555	1	1	357	40.5	5.92	Not Found	Not Found	Not Found	Not Found	High	Not Found	Not Found	Not Found	Not Found	Not Found	Not Found	Not Found	10.86	1505.11	19	NA	NA	NA	NA	7.65126e+07	NA	NA	NA	NA	NA	NA	NA	NA	0	7.65126e+07	0.333333	NA	0	NA	0	NA	NA	NA	NA
Bo4g059750.1		pep chromosome:v2.1:C4:13229880:13234173:1 gene:Bo4g059750 transcript:Bo4g059750.1 gene_biotype:protein_coding transcript_biotype:protein_coding	43.454	38	560	6	1	1077	119.4	5.31	High	High	High	High	High	High	High	High	High	High	High	High	3.549	1503.32	38	4.93354e+07	4.82046e+07	3.55503e+07	3.66418e+07	6.17402e+07	3.94474e+07	3.86221e+07	3.97433e+07	3.39789e+07	2.24214e+07	4.21901e+07	4.10912e+07	4.43634e+07	1	4.59431e+07	1	3.74481e+07	1	3.52342e+07	1	0.965616	0.870428	1.06283	0.756007
Bo6g019810.1	TUA6 description	pep chromosome:v2.1:C6:4256183:4258475:1 gene:Bo6g019810 transcript:Bo6g019810.1 gene_biotype:protein_coding transcript_biotype:protein_coding gene_symbol:TUA6 description:Tubulin/FtsZ family protein :TAIR;Acc:AT4G14960](projected from arabidopsis_thaliana,AT4G14960)	57.1429	20	532	1	1	483	53.2	5.1	High	High	High	High	High	High	High	High	High	High	High	High	10.602	1497.32	20	7.23054e+08	6.88495e+08	7.16046e+08	6.83393e+08	6.41255e+08	6.26942e+08	1.01232e+09	9.63558e+08	1017822783	1.09278e+09	9.77606e+08	9.32815e+08	7.09198e+08	1	6.5053e+08	1	9.97901e+08	1	1.00107e+09	1	1.09018	0.0424071	0.996837	0.953166
Bo6g099400.1	HEXO3 description	pep chromosome:v2.1:C6:31610287:31613566:1 gene:Bo6g099400 transcript:Bo6g099400.1 gene_biotype:protein_coding transcript_biotype:protein_coding gene_symbol:HEXO3 description:beta-hexosaminidase 3 :TAIR;Acc:AT1G65590](projected from arabidopsis_thaliana,AT1G65590)	56.7696	21	544	21	1	421	47.9	7.77	High	High	High	High	High	High	High	High	High	High	High	High	6.565	1497.02	21	1.10885e+09	1.11886e+09	1.11566e+09	9.05701e+08	9.13666e+08	9.28273e+08	1.21247e+09	1.1805e+09	1176115411	1.62085e+09	1.57003e+09	1.65916e+09	1.11445e+09	1	9.1588e+08	1	1.1897e+09	1	1.61668e+09	1	1.21681	1.04964e-05	0.735889	0.000111567
Bo7g008350.1	Plasma membrane ATPase	pep chromosome:v2.1:C7:2417707:2423133:-1 gene:Bo7g008350 transcript:Bo7g008350.1 gene_biotype:protein_coding transcript_biotype:protein_coding description:Plasma membrane ATPase :UniProtKB/TrEMBL;Acc:A0A0D3D2T1]	38.7777	35	581	2	1	949	104.3	6.86	High	High	High	High	High	High	High	High	High	High	High	High	3.541	1494.75	35	5.09876e+07	6.63189e+07	5.20857e+07	6.30237e+07	6.05547e+07	6.02904e+07	3.85912e+07	3.90823e+07	4.03984e+07	4.0367e+07	4.00553e+07	4.13324e+07	5.6464e+07	1	6.12896e+07	1	3.93573e+07	1	4.05849e+07	1	0.921266	0.390317	0.969751	0.137482
Bo2g094820.1		pep chromosome:v2.1:C2:26305345:26309373:1 gene:Bo2g094820 transcript:Bo2g094820.1 gene_biotype:protein_coding transcript_biotype:protein_coding	56.0193	31	536	3	1	623	68.7	5.29	High	High	High	High	High	High	High	High	High	High	High	High	5.026	1492.46	31	2.50413e+08	2.97885e+08	3.45421e+08	3.69853e+08	4.1833e+08	4.33182e+08	3.9964e+08	4.56853e+08	4.1994e+08	4.58018e+08	4.34931e+08	4.71216e+08	2.97906e+08	1	4.07122e+08	1	4.25478e+08	1	4.54722e+08	1	0.731737	0.0308881	0.935688	0.214132
Bo9g165430.1		pep chromosome:v2.1:C9:48712674:48714153:1 gene:Bo9g165430 transcript:Bo9g165430.1 gene_biotype:protein_coding transcript_biotype:protein_coding	63.0435	15	500	8	1	276	29.3	8.7	High	High	High	High	High	High	High	High	High	High	High	High	17.957	1491.85	15	4.34613e+08	5.55739e+08	5.97585e+08	8.76144e+08	9.04752e+08	8.89589e+08	6.50624e+08	7.01872e+08	6.73317e+08	7.1965e+08	7.24775e+08	7.56645e+08	5.29312e+08	1	8.90162e+08	1	6.75271e+08	1	7.3369e+08	1	0.594625	0.00189078	0.920376	0.036008
Bo1g022530.1		pep chromosome:v2.1:C1:8424142:8432997:-1 gene:Bo1g022530 transcript:Bo1g022530.1 gene_biotype:protein_coding transcript_biotype:protein_coding	39.4583	47	575	18	1	1366	150.6	5.97	High	High	High	High	High	High	High	High	High	High	High	High	2.375	1486.85	47	1.34653e+08	1.28385e+08	9.32243e+07	1.56852e+08	1.44336e+08	1.52587e+08	1.64212e+08	1.48884e+08	1.53057e+08	1.69988e+08	1.67097e+08	1.26988e+08	1.18754e+08	1	1.51258e+08	1	1.55384e+08	1	1.54691e+08	1	0.785108	0.0723993	1.00448	0.964447
Bo3g010540.1		pep chromosome:v2.1:C3:3704743:3706607:1 gene:Bo3g010540 transcript:Bo3g010540.1 gene_biotype:protein_coding transcript_biotype:protein_coding	64.1873	20	551	5	1	363	41.1	6.13	High	High	High	High	High	High	High	High	High	High	High	High	14.317	1483.72	20	3.33233e+08	2.04815e+08	3.50324e+08	2.80179e+08	2.33732e+08	2.51793e+08	1.6886e+08	2.14931e+08	6.92019e+07	1.72665e+08	1.06845e+08	8.62506e+07	2.96124e+08	1	2.55235e+08	1	1.50998e+08	1	1.2192e+08	1	1.1602	0.441133	1.2385	0.594088
Bo3g055540.1		pep chromosome:v2.1:C3:21960798:21962929:1 gene:Bo3g055540 transcript:Bo3g055540.1 gene_biotype:protein_coding transcript_biotype:protein_coding	62.8205	19	547	2	1	390	44.1	6.79	High	High	High	High	High	High	Not Found	Not Found	Not Found	Not Found	High	Not Found	9.857	1477.6	19	5.44791e+07	6.38007e+07	7.36737e+07	3.73434e+07	7.86592e+07	2.87973e+07	NA	NA	NA	NA	5.33507e+07	NA	6.39845e+07	1	4.82666e+07	1	NA	0	5.33507e+07	0.333333	1.32565	0.391145	NA	NA
Bo8g097670.1		pep chromosome:v2.1:C8:33329652:33332049:-1 gene:Bo8g097670 transcript:Bo8g097670.1 gene_biotype:protein_coding transcript_biotype:protein_coding	63.6893	31	576	5	1	515	58.6	6.49	High	High	High	High	High	High	High	High	High	High	High	High	11.519	1471.57	31	3.04668e+08	1.58897e+08	2.33463e+08	1.34021e+08	2.83314e+08	2.63975e+08	2.43088e+08	2.53291e+08	2.7816e+08	1.03033e+08	1.91915e+08	1.96725e+08	2.32342e+08	1	2.27103e+08	1	2.5818e+08	1	1.63891e+08	1	1.02307	0.937713	1.57531	0.0428589
Bo00828s060.1		pep scaffold:v2.1:Scaffold00828:34249:35441:-1 gene:Bo00828s060 transcript:Bo00828s060.1 gene_biotype:protein_coding transcript_biotype:protein_coding	65.5385	21	493	3	1	325	35.5	7.4	High	High	High	High	High	High	High	High	High	High	High	High	14.571	1466.71	21	3.72418e+08	3.58982e+08	4.0966e+08	3.60291e+08	3.49305e+08	3.69809e+08	3.62374e+08	3.94279e+08	447929883	3.1806e+08	3.05105e+08	3.44801e+08	3.80353e+08	1	3.59802e+08	1	4.01528e+08	1	3.22655e+08	1	1.05712	0.275262	1.24445	0.0458578
Bo9g183310.1		pep chromosome:v2.1:C9:54145482:54147045:-1 gene:Bo9g183310 transcript:Bo9g183310.1 gene_biotype:protein_coding transcript_biotype:protein_coding	45.2088	17	505	2	1	407	44.7	10.21	High	High	High	High	High	High	High	High	High	High	High	High	7.111	1461.9	17	1.31895e+08	7.90512e+07	1.40849e+08	1.36684e+08	1.299e+08	8.65043e+07	6.40713e+07	7.91713e+07	8.36141e+07	5.48055e+07	4.91442e+07	5.84566e+07	1.17265e+08	1	1.17696e+08	1	7.56189e+07	1	5.41354e+07	1	0.99634	0.987013	1.39685	0.0298661
Bo3g013930.1	AAA-type ATPase family protein	pep chromosome:v2.1:C3:4924633:4927053:1 gene:Bo3g013930 transcript:Bo3g013930.1 gene_biotype:protein_coding transcript_biotype:protein_coding description:AAA-type ATPase family protein :TAIR;Acc:AT5G20000](projected from arabidopsis_thaliana,AT5G20000)	65.3846	24	496	3	1	416	46.8	8.5	High	High	High	High	High	High	High	High	High	High	High	High	5.449	1461.87	24	2.50023e+08	1.87158e+08	2.76767e+08	2.1208e+08	2.23969e+08	3.03223e+08	1.98605e+08	2.18407e+08	1.95975e+08	2.49054e+08	2.52745e+08	2.80636e+08	2.37982e+08	1	2.46424e+08	1	2.04329e+08	1	2.60812e+08	1	0.965744	0.839369	0.783436	0.00988588
Bo3g061680.1	Clathrin heavy chain	pep chromosome:v2.1:C3:23615106:23623595:-1 gene:Bo3g061680 transcript:Bo3g061680.1 gene_biotype:protein_coding transcript_biotype:protein_coding description:Clathrin heavy chain :UniProtKB/TrEMBL;Acc:A0A0D3BAA5]	32.6878	50	537	5	1	1704	192.8	5.3	Not Found	Not Found	Not Found	High	High	High	High	High	High	High	Not Found	Not Found	2.192	1459.5	50	NA	NA	NA	2.63143e+07	2.06748e+07	1.14992e+07	2.28646e+07	1.89245e+07	9.62318e+06	7.82779e+06	NA	NA	NA	0	1.94961e+07	1	1.71374e+07	1	7.82779e+06	0.333333	NA	NA	2.1893	NA
Bo2g166460.1		pep chromosome:v2.1:C2:52221108:52223036:-1 gene:Bo2g166460 transcript:Bo2g166460.1 gene_biotype:protein_coding transcript_biotype:protein_coding	57.3561	22	494	5	1	469	51.7	6.74	High	High	High	High	High	High	High	High	High	High	High	High	4.957	1458.47	22	4.21944e+07	3.69064e+07	3.82761e+07	3.77172e+07	5.82174e+07	3.30965e+07	4.63906e+07	5.37272e+07	51686325	4.66551e+07	4.58537e+07	4.7768e+07	3.91256e+07	1	4.30104e+07	1	5.06014e+07	1	4.67589e+07	1	0.909679	0.647881	1.08218	0.163683
Bo4g006890.1	ATPAP14 description	pep chromosome:v2.1:C4:659490:662904:1 gene:Bo4g006890 transcript:Bo4g006890.1 gene_biotype:protein_coding transcript_biotype:protein_coding gene_symbol:ATPAP14 description:purple acid phosphatase 14 :TAIR;Acc:AT2G46880](projected from arabidopsis_thaliana,AT2G46880)	23.3748	14	454	14	1	723	83.7	8.66	High	High	High	High	High	High	High	High	High	High	High	High	2.814	1456.85	14	2.60827e+09	2.71949e+09	2.87284e+09	1.16641e+09	1.21281e+09	1.1698e+09	1.35239e+09	1.37907e+09	1322142964	9.78243e+08	1.03164e+09	1.02669e+09	2.73353e+09	1	1.18301e+09	1	1.3512e+09	1	1.01219e+09	1	2.31066	3.80484e-05	1.33492	0.00013821
Bo7g119100.1		pep chromosome:v2.1:C7:47945528:47948854:-1 gene:Bo7g119100 transcript:Bo7g119100.1 gene_biotype:protein_coding transcript_biotype:protein_coding	52.9876	37	480	2	1	887	99.4	6.7	High	High	High	High	High	High	High	High	High	High	High	High	4.13	1455.1	37	5.0716e+07	4.77358e+07	5.36854e+07	5.79222e+07	5.27411e+07	5.54313e+07	5.37002e+07	5.46918e+07	5.61954e+07	6.21949e+07	6.1366e+07	6.15727e+07	5.07124e+07	1	5.53649e+07	1	5.48625e+07	1	6.17112e+07	1	0.915966	0.110609	0.88902	0.000869544
Bo3g057220.1		pep chromosome:v2.1:C3:22292245:22295326:1 gene:Bo3g057220 transcript:Bo3g057220.1 gene_biotype:protein_coding transcript_biotype:protein_coding	52.1898	25	526	3	1	548	58.7	5.35	High	High	High	High	High	High	High	High	High	High	High	High	4.109	1450.79	25	2.96311e+08	3.00459e+08	1.93204e+08	3.22616e+08	2.40419e+08	2.33572e+08	2.33991e+08	4.53889e+08	2.81175e+08	4.79304e+08	2.72257e+08	4.88981e+08	2.63325e+08	1	2.65536e+08	1	3.23018e+08	1	4.13514e+08	1	0.991674	0.963387	0.781154	0.404897
Bo3g065760.1	HSP60-3A description	pep chromosome:v2.1:C3:25534065:25537372:-1 gene:Bo3g065760 transcript:Bo3g065760.1 gene_biotype:protein_coding transcript_biotype:protein_coding gene_symbol:HSP60-3A description:heat shock protein 60-3A :TAIR;Acc:AT3G13860](projected from arabidopsis_thaliana,AT3G13860)	58.9161	31	562	31	1	572	60.5	6.23	High	High	High	High	High	High	High	High	High	High	High	High	6.29	1449.76	31	8.67975e+08	1.64045e+09	8.18256e+08	9.94343e+08	1.01573e+09	9.41335e+08	9.8261e+08	9.88688e+08	9.77621e+08	1.13237e+09	1.13572e+09	1.11661e+09	1.10889e+09	1	9.83801e+08	1	9.82973e+08	1	1.12823e+09	1	1.12715	0.663905	0.87125	2.68552e-05
Bo9g027480.1	Plasma membrane ATPase	pep chromosome:v2.1:C9:8680770:8686123:1 gene:Bo9g027480 transcript:Bo9g027480.1 gene_biotype:protein_coding transcript_biotype:protein_coding description:Plasma membrane ATPase :UniProtKB/TrEMBL;Acc:A0A0D3E3F2]	37.6185	34	561	1	1	949	104.3	6.76	High	High	High	High	High	High	High	High	High	High	High	High	3.589	1448.73	34	2.6611e+08	2.46023e+08	2.8612e+08	1.62575e+08	2.14244e+08	2.21486e+08	1.71005e+08	1.68812e+08	174472292	1.48298e+08	1.47898e+08	1.18889e+08	2.66084e+08	1	1.99435e+08	1	1.7143e+08	1	1.38362e+08	1	1.33419	0.0380873	1.239	0.028608
Bo1g007960.1		pep chromosome:v2.1:C1:2768370:2773387:-1 gene:Bo1g007960 transcript:Bo1g007960.1 gene_biotype:protein_coding transcript_biotype:protein_coding	48.3395	39	655	9	1	813	89.9	6.28	High	High	High	High	High	High	High	High	High	High	High	High	4.722	1447.34	39	8.35325e+07	8.43586e+07	9.40985e+07	1.20946e+08	1.25801e+08	1.29406e+08	1.4752e+08	1.48871e+08	1.59628e+08	1.43333e+08	1.3787e+08	1.32964e+08	8.73299e+07	1	1.25384e+08	1	1.52006e+08	1	1.38056e+08	1	0.696497	0.000811453	1.10105	0.0455084
Bo3g052140.1	Elongation factor Tu	pep chromosome:v2.1:C3:20417007:20419643:1 gene:Bo3g052140 transcript:Bo3g052140.1 gene_biotype:protein_coding transcript_biotype:protein_coding description:Elongation factor Tu :UniProtKB/TrEMBL;Acc:A0A0D3B8P7]	59.6026	23	523	3	1	453	49.1	6.55	High	High	High	High	High	High	High	High	High	High	High	High	6.079	1446.55	23	1.09795e+08	1.10999e+08	1.02636e+08	1.99136e+08	1.84618e+08	1.89233e+08	1.01181e+08	1.43428e+08	1.73013e+08	1.70054e+08	1.15606e+08	1.07828e+08	1.0781e+08	1	1.90996e+08	1	1.39208e+08	1	1.31163e+08	1	0.564462	7.74049e-05	1.06133	0.792399
Bo3g132900.1	Protein TOC75-3, chloroplastic	pep chromosome:v2.1:C3:48520621:48523809:-1 gene:Bo3g132900 transcript:Bo3g132900.1 gene_biotype:protein_coding transcript_biotype:protein_coding description:Protein TOC75-3, chloroplastic :Projected from Arabidopsis thaliana (AT3G46740) UniProtKB/Swiss-Prot;Acc:Q9STE8]	43.0488	27	480	7	1	820	89.4	8.53	High	High	High	High	High	High	High	High	High	High	High	High	3.526	1443.47	27	2.83983e+08	2.9709e+08	3.00963e+08	2.73244e+08	2.67211e+08	2.44862e+08	2.94147e+08	2.85641e+08	2.82872e+08	3.02485e+08	3.27956e+08	3.18004e+08	2.94012e+08	1	2.61772e+08	1	2.87554e+08	1	3.16148e+08	1	1.12316	0.032612	0.909553	0.0247098
Bo4g195050.1	Phosphoribosyltransferase family protein	pep chromosome:v2.1:C4:52656430:52658620:1 gene:Bo4g195050 transcript:Bo4g195050.1 gene_biotype:protein_coding transcript_biotype:protein_coding description:Phosphoribosyltransferase family protein :TAIR;Acc:AT2G44530](projected from arabidopsis_thaliana,AT2G44530)	49.8741	14	425	8	1	397	42.9	6.24	High	High	High	High	High	High	High	High	High	High	High	High	9	1439.23	14	5.2216e+08	4.98838e+08	5.10394e+08	5.72655e+08	5.84277e+08	5.75663e+08	6.84974e+08	6.94329e+08	7.19956e+08	8.06891e+08	8.36187e+08	8.94646e+08	5.10464e+08	1	5.77531e+08	1	6.99753e+08	1	8.45908e+08	1	0.883872	0.000900898	0.827221	0.00629273
Bo9g169510.1	TUB6 description	pep chromosome:v2.1:C9:49970226:49972308:1 gene:Bo9g169510 transcript:Bo9g169510.1 gene_biotype:protein_coding transcript_biotype:protein_coding gene_symbol:TUB6 description:beta-6 tubulin :TAIR;Acc:AT5G12250](projected from arabidopsis_thaliana,AT5G12250)	42.3554	18	544	4	1	484	54.8	5.17	High	High	High	High	High	High	High	High	High	High	High	High	8.237	1436.48	18	1.1673e+08	1.31349e+08	1.48782e+08	1.33104e+08	1.26991e+08	1.09323e+08	1.72236e+08	1.67804e+08	1.65973e+08	1.63324e+08	1.4939e+08	1.72857e+08	1.32287e+08	1	1.23139e+08	1	1.68671e+08	1	1.61857e+08	1	1.07429	0.477666	1.0421	0.389329
Bo4g136560.1	EMB1467 description	pep chromosome:v2.1:C4:35491567:35494033:1 gene:Bo4g136560 transcript:Bo4g136560.1 gene_biotype:protein_coding transcript_biotype:protein_coding gene_symbol:EMB1467 description:NADH-ubiquinone dehydrogenase, mitochondrial, putative :TAIR;Acc:AT5G37510](projected from arabidopsis_thaliana,AT5G37510)	45.8445	28	483	28	1	746	81.1	6.95	High	High	High	High	High	High	High	High	High	High	High	High	3.833	1435.41	28	4.07784e+08	3.76603e+08	3.90988e+08	4.21743e+08	4.06733e+08	4.33248e+08	4.48821e+08	4.21613e+08	4.31433e+08	4.78385e+08	4.70421e+08	4.4706e+08	3.91792e+08	1	4.20574e+08	1	4.33956e+08	1	4.65289e+08	1	0.931563	0.0718531	0.932659	0.0636765
Bo8g054360.1		pep chromosome:v2.1:C8:17934123:17935477:-1 gene:Bo8g054360 transcript:Bo8g054360.1 gene_biotype:protein_coding transcript_biotype:protein_coding	38.189	9	577	1	1	254	28	9.03	Not Found	Not Found	Not Found	Not Found	Not Found	High	Not Found	Not Found	High	Not Found	High	Not Found	2.511	1429.98	9	NA	NA	NA	NA	NA	5.64753e+07	NA	NA	47775334	NA	3.12042e+07	NA	NA	0	5.64753e+07	0.333333	47775334	0.333333	3.12042e+07	0.333333	NA	NA	1.53106	NA
Bo2g078960.1		pep chromosome:v2.1:C2:21839877:21841909:-1 gene:Bo2g078960 transcript:Bo2g078960.1 gene_biotype:protein_coding transcript_biotype:protein_coding	50.4831	22	500	4	1	414	46.8	5.48	High	High	High	High	High	High	Not Found	Not Found	High	Not Found	Not Found	Not Found	9.701	1425.14	22	NA	4.77886e+07	3.14445e+07	NA	3.1005e+07	NA	NA	NA	7.24109e+07	NA	NA	NA	3.96166e+07	0.666667	3.1005e+07	0.333333	7.24109e+07	0.333333	NA	0	1.27775	NA	NA	NA
Bo3g170550.1		pep chromosome:v2.1:C3:60081509:60086764:-1 gene:Bo3g170550 transcript:Bo3g170550.1 gene_biotype:protein_coding transcript_biotype:protein_coding	46.0123	39	629	12	1	815	89.8	6.76	High	High	High	High	High	High	High	High	High	High	High	High	4.77	1421.53	39	7.34658e+07	8.5528e+07	8.21189e+07	1.50934e+08	1.33768e+08	1.14232e+08	1.3687e+08	1.39023e+08	1.4073e+08	1.19687e+08	1.28144e+08	1.20908e+08	8.03709e+07	1	1.32978e+08	1	1.38874e+08	1	1.22913e+08	1	0.604392	0.00931051	1.12986	0.00509053
Bo6g079260.1		pep chromosome:v2.1:C6:23670541:23673712:-1 gene:Bo6g079260 transcript:Bo6g079260.1 gene_biotype:protein_coding transcript_biotype:protein_coding	62.037	30	550	4	1	540	61.8	7.09	High	High	High	High	High	High	High	High	High	High	High	High	9	1420.91	30	1.42851e+08	1.97962e+08	1.92272e+08	9.61316e+07	1.33019e+08	1.66578e+08	6.96085e+07	1.77523e+08	1.55575e+08	7.54235e+07	7.30817e+07	1.55302e+08	1.77695e+08	1	1.3191e+08	1	1.34235e+08	1	1.01269e+08	1	1.3471	0.163164	1.32553	0.482196
Bo9g006140.1	Elongation factor Tu	pep chromosome:v2.1:C9:1338796:1341248:-1 gene:Bo9g006140 transcript:Bo9g006140.1 gene_biotype:protein_coding transcript_biotype:protein_coding description:Elongation factor Tu :UniProtKB/TrEMBL;Acc:A0A0D3E058]	60.0877	23	507	3	1	456	49.5	6.87	High	High	High	High	High	High	High	High	High	High	High	High	5.31	1420.43	23	2.92448e+08	2.69383e+08	2.59932e+08	3.23442e+08	3.54602e+08	3.13535e+08	2.40934e+08	2.43703e+08	2.52418e+08	2.77409e+08	2.67177e+08	2.77047e+08	2.73921e+08	1	3.30526e+08	1	2.45685e+08	1	2.73878e+08	1	0.828742	0.0226282	0.897062	0.00425349
Bo3g178280.1	tubulin alpha-2 chain	pep chromosome:v2.1:C3:62118530:62120514:1 gene:Bo3g178280 transcript:Bo3g178280.1 gene_biotype:protein_coding transcript_biotype:protein_coding description:tubulin alpha-2 chain :Projected from Arabidopsis thaliana (AT1G50010) TAIR;Acc:AT1G50010]	56.6667	20	491	1	1	450	49.5	5.06	Not Found	High	Not Found	Not Found	Not Found	High	High	High	Not Found	Not Found	Not Found	Not Found	12.895	1417.99	20	NA	8.51746e+07	NA	NA	NA	8.71345e+07	8.41898e+07	9.26417e+07	NA	NA	NA	NA	8.51746e+07	0.333333	8.71345e+07	0.333333	8.84157e+07	0.666667	NA	0	0.977508	NA	NA	NA
Bo1g008520.1	AtGLDP1 description	pep chromosome:v2.1:C1:3019307:3023592:1 gene:Bo1g008520 transcript:Bo1g008520.1 gene_biotype:protein_coding transcript_biotype:protein_coding gene_symbol:AtGLDP1 description:glycine decarboxylase P-protein 1 :TAIR;Acc:AT4G33010](projected from arabidopsis_thaliana,AT4G33010)	41.0697	34	463	34	1	1047	114.5	7.09	High	High	High	High	High	High	High	High	High	High	High	High	4.285	1407.31	34	2.45955e+08	2.66381e+08	2.48903e+08	2.30978e+08	2.41204e+08	2.35641e+08	2.73343e+08	2.707e+08	3.05553e+08	2.05109e+08	1.88142e+08	2.14008e+08	2.53746e+08	1	2.35941e+08	1	2.83199e+08	1	2.0242e+08	1	1.07546	0.0643879	1.39907	0.00395407
Bo5g061100.1	CARB description	pep chromosome:v2.1:C5:19065666:19069426:1 gene:Bo5g061100 transcript:Bo5g061100.1 gene_biotype:protein_coding transcript_biotype:protein_coding gene_symbol:CARB description:carbamoyl phosphate synthetase B :TAIR;Acc:AT1G29900](projected from arabidopsis_thaliana,AT1G29900)	35.6839	40	606	40	1	1177	128.9	5.72	High	High	High	High	High	High	High	High	High	High	High	High	2.756	1395.46	40	3.03308e+08	3.02621e+08	2.93475e+08	3.02903e+08	2.80411e+08	2.77661e+08	2.56532e+08	2.61883e+08	2.55367e+08	2.36829e+08	2.2013e+08	2.41941e+08	2.99802e+08	1	2.86992e+08	1	2.57927e+08	1	2.32967e+08	1	1.04464	0.210609	1.10714	0.0222469
Bo6g116140.1		pep chromosome:v2.1:C6:36260039:36261455:-1 gene:Bo6g116140 transcript:Bo6g116140.1 gene_biotype:protein_coding transcript_biotype:protein_coding	42.9952	19	501	1	1	414	46.9	5.58	High	High	High	High	High	Not Found	Not Found	Not Found	Not Found	High	High	High	7.733	1394.89	19	8.11314e+07	8.07951e+07	7.02634e+07	8.61176e+07	7.44185e+07	NA	NA	NA	NA	8.72883e+07	7.73561e+07	7.34498e+07	7.73966e+07	1	8.0268e+07	0.666667	NA	0	7.93647e+07	1	0.964227	0.68148	NA	NA
Bo6g121350.1		pep chromosome:v2.1:C6:38489371:38491229:1 gene:Bo6g121350 transcript:Bo6g121350.1 gene_biotype:protein_coding transcript_biotype:protein_coding	53.7313	20	456	3	1	469	51.6	7.14	High	High	High	High	High	Not Found	High	High	High	High	High	High	4.097	1381.78	20	8.06056e+07	2.36181e+06	8.27434e+06	8.00462e+08	4.03933e+08	NA	6.86302e+08	6.37162e+08	NA	3.83492e+08	1.35529e+07	1.96016e+07	3.04139e+07	1	6.02198e+08	0.666667	6.61732e+08	0.666667	1.38882e+08	1	0.0505049	0.0324643	4.7647	0.0461127
Bo4g004550.1		pep chromosome:v2.1:C4:339030:343119:1 gene:Bo4g004550 transcript:Bo4g004550.1 gene_biotype:protein_coding transcript_biotype:protein_coding	39.4456	28	482	10	1	938	104.1	6.24	High	High	High	High	High	High	High	High	High	High	High	High	2.554	1377.16	28	1.53901e+08	1.46642e+08	1.28578e+08	1.65678e+08	1.70715e+08	1.69144e+08	1.28216e+08	1.23544e+08	122162252	1.42416e+08	1.28725e+08	1.30914e+08	1.4304e+08	1	1.68512e+08	1	1.24641e+08	1	1.34018e+08	1	0.848843	0.0294022	0.930028	0.112477
Bo3g023990.1	CLPC description	pep chromosome:v2.1:C3:8833069:8836650:1 gene:Bo3g023990 transcript:Bo3g023990.1 gene_biotype:protein_coding transcript_biotype:protein_coding gene_symbol:CLPC description:CLPC homologue 1 :TAIR;Acc:AT5G50920](projected from arabidopsis_thaliana,AT5G50920)	44.1935	36	527	8	1	930	103.1	6.89	High	High	High	High	High	High	High	High	High	High	High	High	2.204	1372.1	36	9.84852e+07	9.54705e+07	1.00966e+08	1.20398e+08	2.26584e+08	2.43393e+08	1.0635e+08	9.8486e+07	1.02524e+08	1.24797e+08	1.16145e+08	1.15012e+08	9.83073e+07	1	1.96792e+08	1	1.02453e+08	1	1.18651e+08	1	0.499549	0.0629299	0.863482	0.0134308
Bo1g053250.1	ACX1 description	pep chromosome:v2.1:C1:15287209:15290807:1 gene:Bo1g053250 transcript:Bo1g053250.1 gene_biotype:protein_coding transcript_biotype:protein_coding gene_symbol:ACX1 description:acyl-CoA oxidase 1 :TAIR;Acc:AT4G16760](projected from arabidopsis_thaliana,AT4G16760)	59.3373	36	471	36	1	664	74.3	7.81	High	High	High	High	High	High	High	High	High	High	High	High	5.256	1368.21	36	2.81643e+08	2.80387e+08	2.88355e+08	3.56386e+08	3.60504e+08	3.47434e+08	3.5624e+08	3.38184e+08	324632448	3.5125e+08	3.676e+08	3.51548e+08	2.83462e+08	1	3.54775e+08	1	3.39685e+08	1	3.56799e+08	1	0.79899	9.95507e-05	0.952035	0.182682
Bo6g108940.1	CYP704B1 description	pep chromosome:v2.1:C6:34109775:34111950:1 gene:Bo6g108940 transcript:Bo6g108940.1 gene_biotype:protein_coding transcript_biotype:protein_coding gene_symbol:CYP704B1 description:cytochrome P450, family 704, subfamily B, polypeptide 1 :TAIR;Acc:AT1G69500](projected from arabidopsis_thaliana,AT1G69500)	60.3083	33	530	33	1	519	59.9	8.57	High	High	High	High	High	High	High	High	High	High	High	High	10.743	1367.49	33	5.43919e+08	5.6975e+08	5.91249e+08	5.63313e+08	6.11996e+08	6.0163e+08	4.72919e+08	4.90715e+08	4.85186e+08	4.53989e+08	4.44423e+08	4.51165e+08	5.68306e+08	1	5.92313e+08	1	4.8294e+08	1	4.49859e+08	1	0.959469	0.299552	1.07354	0.00520342
Bo4g045450.1		pep chromosome:v2.1:C4:10414127:10416798:1 gene:Bo4g045450 transcript:Bo4g045450.1 gene_biotype:protein_coding transcript_biotype:protein_coding	49.6614	16	467	14	1	443	47.9	5.97	High	High	High	High	High	High	High	High	High	High	High	High	6.279	1362.16	16	1.45453e+09	1.39472e+09	1.32479e+09	1.1773e+09	1.14963e+09	7.72064e+08	1.05324e+09	1.09984e+09	1092833280	1.21887e+09	1.13407e+09	1.20356e+09	1.39135e+09	1	1.033e+09	1	1.08197e+09	1	1.1855e+09	1	1.3469	0.0578662	0.912671	0.0256308
Bo6g051350.1		pep chromosome:v2.1:C6:14288247:14291093:-1 gene:Bo6g051350 transcript:Bo6g051350.1 gene_biotype:protein_coding transcript_biotype:protein_coding	59.8333	36	540	3	1	600	63.9	6.38	High	High	High	High	High	High	Not Found	Not Found	Not Found	High	High	High	4.505	1360.69	36	1.10291e+08	7.93883e+07	1.07796e+08	1.46722e+08	1.4864e+08	7.91208e+07	NA	NA	NA	1.47753e+08	1.22781e+08	1.30712e+08	9.91581e+07	1	1.24828e+08	1	NA	0	1.33749e+08	1	0.794359	0.361115	NA	NA
Bo5g002580.1	CYP703A2 description	pep chromosome:v2.1:C5:314061:315761:-1 gene:Bo5g002580 transcript:Bo5g002580.1 gene_biotype:protein_coding transcript_biotype:protein_coding gene_symbol:CYP703A2 description:cytochrome P450, family 703, subfamily A, polypeptide 2 :TAIR;Acc:AT1G01280](projected from arabidopsis_thaliana,AT1G01280)	49.3204	24	494	24	1	515	58.8	8.57	High	High	High	High	High	High	High	High	High	High	High	High	9	1358.81	24	5.80935e+08	5.72508e+08	5.93621e+08	6.44163e+08	6.67454e+08	6.98015e+08	4.76709e+08	4.86139e+08	4.96726e+08	4.5794e+08	4.50057e+08	4.37491e+08	5.82355e+08	1	6.69877e+08	1	4.86524e+08	1	4.48496e+08	1	0.869345	0.00641386	1.08479	0.0101682
Bo2g032430.1		pep chromosome:v2.1:C2:9225338:9230174:1 gene:Bo2g032430 transcript:Bo2g032430.1 gene_biotype:protein_coding transcript_biotype:protein_coding	37.2727	24	534	3	1	660	72.9	6.62	High	High	High	High	High	High	High	High	High	High	High	High	4.036	1351	24	3.53977e+08	3.39528e+08	3.28969e+08	2.61972e+08	2.55858e+08	2.55937e+08	3.14147e+08	3.11186e+08	2.20229e+08	1.74954e+08	1.78379e+08	2.38414e+08	3.40825e+08	1	2.57923e+08	1	2.81854e+08	1	1.97249e+08	1	1.32142	0.00038599	1.42892	0.0846157
Bo3g057170.1		pep chromosome:v2.1:C3:22272991:22277206:1 gene:Bo3g057170 transcript:Bo3g057170.1 gene_biotype:protein_coding transcript_biotype:protein_coding	30.0654	19	429	3	1	765	84.9	6.71	High	High	High	High	High	High	High	Not Found	High	High	High	High	1.569	1346.6	19	6.48188e+08	3.56185e+08	7.39209e+08	6.99669e+08	3.74371e+08	3.83167e+08	4.86252e+08	NA	353871815	2.76214e+08	3.07439e+08	6.84957e+08	5.81194e+08	1	4.85736e+08	1	4.20062e+08	0.666667	4.2287e+08	1	1.19652	0.577094	0.99336	0.988313
Bo9g004260.1	SAM-2 description	pep chromosome:v2.1:C9:788116:789297:-1 gene:Bo9g004260 transcript:Bo9g004260.1 gene_biotype:protein_coding transcript_biotype:protein_coding gene_symbol:SAM-2 description:S-adenosylmethionine synthetase 2 :TAIR;Acc:AT4G01850](projected from arabidopsis_thaliana,AT4G01850)	60.5598	19	462	1	1	393	43.2	6.06	High	High	High	High	High	High	High	High	High	High	High	High	9.771	1346.56	19	2.5433e+08	3.20641e+08	2.96512e+08	2.64674e+08	2.45859e+08	2.62305e+08	2.23547e+08	2.29525e+08	2.11504e+08	1.88738e+08	2.32371e+08	2.50359e+08	2.90494e+08	1	2.57613e+08	1	2.21525e+08	1	2.23823e+08	1	1.12764	0.179926	0.989737	0.909821
Bo8g070530.1	Pyrophosphate--fructose 6-phosphate 1-phosphotransferase subunit alpha	pep chromosome:v2.1:C8:23131461:23135000:-1 gene:Bo8g070530 transcript:Bo8g070530.1 gene_biotype:protein_coding transcript_biotype:protein_coding description:Pyrophosphate--fructose 6-phosphate 1-phosphotransferase subunit alpha :UniProtKB/TrEMBL;Acc:A0A0D3DQP0]	43.2956	23	485	1	1	619	67.5	6.86	Not Found	Not Found	Not Found	Not Found	Not Found	Not Found	High	High	High	Not Found	Not Found	Not Found	3.642	1340.37	23	NA	NA	NA	NA	NA	NA	1.11612e+07	1.07809e+07	NA	NA	NA	NA	NA	0	NA	0	1.0971e+07	0.666667	NA	0	NA	NA	NA	NA
Bo1g141130.1		pep chromosome:v2.1:C1:40344849:40348712:-1 gene:Bo1g141130 transcript:Bo1g141130.1 gene_biotype:protein_coding transcript_biotype:protein_coding	32.4547	38	556	38	1	1214	134.7	5.54	High	High	High	High	High	High	High	High	High	High	High	High	2.684	1333.77	38	3.1726e+08	2.93117e+08	3.18146e+08	3.40504e+08	3.17218e+08	3.35679e+08	3.3934e+08	3.41318e+08	330361316	3.42601e+08	3.16464e+08	3.18019e+08	3.09508e+08	1	3.31134e+08	1	3.37007e+08	1	3.25695e+08	1	0.934692	0.116863	1.03473	0.282268
Bo5g030890.1	Pyrophosphate--fructose 6-phosphate 1-phosphotransferase subunit alpha	pep chromosome:v2.1:C5:10678767:10682592:-1 gene:Bo5g030890 transcript:Bo5g030890.1 gene_biotype:protein_coding transcript_biotype:protein_coding description:Pyrophosphate--fructose 6-phosphate 1-phosphotransferase subunit alpha :UniProtKB/TrEMBL;Acc:A0A0D3CBY0]	43.2956	23	483	1	1	619	67.5	6.86	Not Found	Not Found	Not Found	Not Found	High	Not Found	Not Found	Not Found	Not Found	Not Found	Not Found	Not Found	3.642	1330.6	23	NA	NA	NA	NA	1.27711e+07	NA	NA	NA	NA	NA	NA	NA	NA	0	1.27711e+07	0.333333	NA	0	NA	0	NA	NA	NA	NA
Bo3g037260.1	Citrate synthase	pep chromosome:v2.1:C3:14951845:14955604:1 gene:Bo3g037260 transcript:Bo3g037260.1 gene_biotype:protein_coding transcript_biotype:protein_coding description:Citrate synthase :UniProtKB/TrEMBL;Acc:A0A0D3B6Q1]	54.3158	19	430	3	1	475	52.7	7.55	High	High	High	High	High	High	High	High	High	High	High	High	4.995	1327.36	19	1.45749e+08	1.54067e+08	1.5938e+08	2.06385e+08	1.96855e+08	2.20381e+08	2.33501e+08	2.46157e+08	2.69686e+08	2.08823e+08	2.00418e+08	1.75758e+08	1.53066e+08	1	2.07874e+08	1	2.49781e+08	1	1.95e+08	1	0.736339	0.00226683	1.28093	0.0195582
Bo5g050630.1		pep chromosome:v2.1:C5:16942867:16945891:1 gene:Bo5g050630 transcript:Bo5g050630.1 gene_biotype:protein_coding transcript_biotype:protein_coding	56.7901	22	438	4	1	486	54.1	5.15	High	High	High	High	High	High	High	High	High	High	High	High	7.254	1325.18	22	4.29288e+08	4.45531e+08	2.94598e+08	4.83068e+08	4.74897e+08	4.94565e+08	4.34411e+08	4.3773e+08	4.50135e+08	5.30952e+08	5.03702e+08	4.70435e+08	3.89806e+08	1	4.84177e+08	1	4.40759e+08	1	5.01696e+08	1	0.80509	0.121695	0.878537	0.0283278
Bo3g185270.1		pep chromosome:v2.1:C3:64621717:64624606:-1 gene:Bo3g185270 transcript:Bo3g185270.1 gene_biotype:protein_coding transcript_biotype:protein_coding	59.8333	37	527	5	1	600	63.7	6.64	High	High	High	High	High	High	Not Found	Not Found	High	Not Found	High	High	4.745	1321.89	37	1.12286e+08	1.16546e+08	1.16731e+08	1.05892e+08	1.09806e+08	1.1391e+08	NA	NA	1.25691e+07	NA	9.36847e+07	7.23693e+07	1.15188e+08	1	1.09869e+08	1	1.25691e+07	0.333333	8.3027e+07	0.666667	1.04841	0.123442	0.151386	NA
Bo3g055210.1		pep chromosome:v2.1:C3:21807814:21809518:-1 gene:Bo3g055210 transcript:Bo3g055210.1 gene_biotype:protein_coding transcript_biotype:protein_coding	48.5981	12	464	5	1	321	34.6	9.44	High	High	High	High	High	High	High	High	High	High	High	High	6.197	1320.83	12	9.46445e+08	9.39892e+08	9.25855e+08	1.09728e+09	1.14475e+09	1.12193e+09	1.03344e+09	9.56919e+08	9.72807e+08	1.25109e+09	1.22186e+09	1.19494e+09	9.37397e+08	1	1.12132e+09	1	9.87722e+08	1	1.22263e+09	1	0.835975	0.000253418	0.807866	0.00116581
Bo1g011800.1		pep chromosome:v2.1:C1:4260681:4263238:1 gene:Bo1g011800 transcript:Bo1g011800.1 gene_biotype:protein_coding transcript_biotype:protein_coding	49.5697	22	447	15	1	581	60.9	6.74	High	High	High	High	High	High	High	High	High	High	High	High	4.097	1315.11	22	3.17546e+08	3.11669e+08	3.13254e+08	3.10073e+08	3.29443e+08	3.32317e+08	2.52446e+08	2.49817e+08	2.43764e+08	2.90487e+08	2.8724e+08	2.9079e+08	3.14156e+08	1	3.23944e+08	1	2.48676e+08	1	2.89506e+08	1	0.969785	0.245735	0.858966	0.000130508
Bo1g006160.1	ACO1 description	pep chromosome:v2.1:C1:1821823:1826377:1 gene:Bo1g006160 transcript:Bo1g006160.1 gene_biotype:protein_coding transcript_biotype:protein_coding gene_symbol:ACO1 description:aconitase 1 :TAIR;Acc:AT4G35830](projected from arabidopsis_thaliana,AT4G35830)	43.0958	29	496	6	1	898	98	6.44	High	High	High	High	High	High	High	High	High	High	High	High	2.728	1313.94	29	8.58009e+07	8.42445e+07	7.95812e+07	8.30821e+07	7.49073e+07	8.33666e+07	5.38995e+07	6.64095e+07	6.64087e+07	5.16114e+07	6.51525e+07	5.24592e+07	8.32089e+07	1	8.0452e+07	1	6.22392e+07	1	5.64077e+07	1	1.03427	0.456065	1.10338	0.389472
Bo4g024520.1		pep chromosome:v2.1:C4:3810288:3811194:-1 gene:Bo4g024520 transcript:Bo4g024520.1 gene_biotype:protein_coding transcript_biotype:protein_coding	54.3046	9	470	2	1	151	17.1	10.39	High	High	High	High	High	High	High	High	High	High	High	High	10.938	1289.48	9	3.11824e+08	2.9416e+08	2.84709e+08	2.49734e+08	1.981e+08	3.89906e+08	1.90563e+08	2.27097e+08	2.39906e+08	4.24701e+08	2.41645e+08	2.36942e+08	2.96897e+08	1	2.79247e+08	1	2.19189e+08	1	3.01096e+08	1	1.06321	0.7755	0.72797	0.267001
Bo1g118930.1		pep chromosome:v2.1:C1:35584479:35585654:1 gene:Bo1g118930 transcript:Bo1g118930.1 gene_biotype:protein_coding transcript_biotype:protein_coding	59.2025	18	417	1	1	326	35.6	7.39	High	High	High	High	High	High	High	High	High	High	High	High	9.926	1286.16	18	5.85283e+07	5.59945e+07	5.92898e+07	5.28316e+07	5.7929e+07	5.23284e+07	4.32176e+07	4.44369e+07	4.98547e+07	3.8342e+07	4.20916e+07	4.73826e+07	5.79375e+07	1	5.4363e+07	1	4.58364e+07	1	4.26054e+07	1	1.06575	0.155783	1.07583	0.385864
Bo4g194920.1	Citrate synthase	pep chromosome:v2.1:C4:52582585:52586393:1 gene:Bo4g194920 transcript:Bo4g194920.1 gene_biotype:protein_coding transcript_biotype:protein_coding description:Citrate synthase :UniProtKB/TrEMBL;Acc:A0A0D3C679]	57.4737	20	434	4	1	475	52.7	7.15	High	High	High	High	High	High	High	High	High	High	High	High	6.128	1282.85	20	9.87598e+07	7.57389e+07	9.96372e+07	1.08368e+08	9.67032e+07	9.46564e+07	8.02275e+07	9.05125e+07	8.51919e+07	7.88546e+07	7.0794e+07	8.04205e+07	9.13786e+07	1	9.99093e+07	1	8.53106e+07	1	7.66897e+07	1	0.914616	0.392743	1.11241	0.109893
Bo4g154280.1		pep chromosome:v2.1:C4:42183085:42185442:-1 gene:Bo4g154280 transcript:Bo4g154280.1 gene_biotype:protein_coding transcript_biotype:protein_coding	61.8042	23	418	12	1	521	54.4	5.48	High	High	High	High	High	High	High	High	High	High	High	High	7.161	1272.23	23	2.7625e+08	2.77142e+08	3.02951e+08	2.60605e+08	2.99438e+08	3.06303e+08	1.93508e+08	1.70382e+08	1.94997e+08	2.51358e+08	2.28307e+08	2.40911e+08	2.85448e+08	1	2.88782e+08	1	1.86295e+08	1	2.40192e+08	1	0.988453	0.851516	0.775611	0.00656819
Bo4g170760.1		pep chromosome:v2.1:C4:45574340:45578235:-1 gene:Bo4g170760 transcript:Bo4g170760.1 gene_biotype:protein_coding transcript_biotype:protein_coding	34.9478	31	482	4	1	1053	116.9	5.34	High	High	High	High	High	High	High	High	High	High	High	High	2.711	1270.47	31	1.68561e+07	3.27073e+07	2.35462e+07	7.81351e+07	9.34055e+07	8.58054e+07	1.02189e+08	1.11802e+08	115838299	9.23557e+07	8.29436e+07	1.07033e+08	2.43699e+07	1	8.5782e+07	1	1.09943e+08	1	9.41107e+07	1	0.284091	0.000646259	1.16823	0.122117
Bo4g104810.1		pep chromosome:v2.1:C4:26065667:26066605:1 gene:Bo4g104810 transcript:Bo4g104810.1 gene_biotype:protein_coding transcript_biotype:protein_coding	54.3046	9	449	2	1	151	17.1	10.33	High	High	High	High	High	High	High	High	High	High	High	High	10.938	1269.48	9	1.00349e+08	8.88434e+07	9.00751e+07	1.8123e+08	1.73429e+08	1.05349e+08	9.03827e+07	8.66265e+07	129902255	7.83436e+07	1.32542e+08	7.89391e+07	9.30891e+07	1	1.53336e+08	1	1.02304e+08	1	9.66082e+07	1	0.607092	0.0688102	1.05896	0.814095
Bo7g081690.1		pep chromosome:v2.1:C7:31668002:31671791:1 gene:Bo7g081690 transcript:Bo7g081690.1 gene_biotype:protein_coding transcript_biotype:protein_coding	44.4444	30	490	4	1	783	89	5.06	High	High	High	High	High	High	High	High	High	High	High	High	2.981	1268.75	30	7.52886e+07	6.83133e+07	6.75722e+07	8.03596e+07	6.76222e+07	8.88647e+07	5.5322e+07	5.18558e+07	7.95457e+07	7.23299e+07	7.12867e+07	6.52689e+07	7.03914e+07	1	7.89488e+07	1	6.22412e+07	1	6.96285e+07	1	0.891608	0.267208	0.893904	0.457092
Bo3g031660.1		pep chromosome:v2.1:C3:11770423:11771552:-1 gene:Bo3g031660 transcript:Bo3g031660.1 gene_biotype:protein_coding transcript_biotype:protein_coding	41.5459	11	491	11	1	207	23	9.67	High	High	High	High	High	High	High	High	High	High	High	High	10.365	1263.48	11	2.8689e+09	2.8161e+09	2.94132e+09	2.58892e+09	2.62573e+09	2.61192e+09	2.8951e+09	2.82072e+09	2921492183	3.26297e+09	3.14872e+09	3.02318e+09	2.87544e+09	1	2.60886e+09	1	2.8791e+09	1	3.14496e+09	1	1.10218	0.00214232	0.915466	0.0244555
Bo6g086930.1		pep chromosome:v2.1:C6:27282153:27283649:-1 gene:Bo6g086930 transcript:Bo6g086930.1 gene_biotype:protein_coding transcript_biotype:protein_coding	40.3614	23	503	22	1	498	56.8	7.21	High	High	High	High	High	High	High	High	High	High	High	High	11.053	1262.27	23	9.35168e+08	8.67016e+08	8.67381e+08	8.24969e+08	7.98193e+08	8.15835e+08	7.85799e+08	5.04034e+08	5.87001e+08	8.73949e+08	6.01388e+08	8.21559e+08	8.89855e+08	1	8.12999e+08	1	6.25611e+08	1	7.65632e+08	1	1.09453	0.0327498	0.817118	0.301602
Bo5g010710.1		pep chromosome:v2.1:C5:4082284:4088952:1 gene:Bo5g010710 transcript:Bo5g010710.1 gene_biotype:protein_coding transcript_biotype:protein_coding	53.2382	43	455	11	1	911	98.9	9	High	High	High	High	High	High	High	High	High	High	High	High	3.687	1259.94	43	6.21695e+07	6.99112e+07	4.51074e+07	5.81234e+07	5.82712e+07	7.6878e+07	8.70337e+07	8.31733e+07	5.23833e+07	8.94053e+07	7.18513e+07	6.02944e+07	5.90627e+07	1	6.44242e+07	1	7.41968e+07	1	7.38504e+07	1	0.916778	0.606854	1.00469	0.981244
Bo1g112380.1		pep chromosome:v2.1:C1:34299370:34301620:-1 gene:Bo1g112380 transcript:Bo1g112380.1 gene_biotype:protein_coding transcript_biotype:protein_coding	46.8137	27	493	20	1	408	46	5.99	High	High	High	High	High	High	High	High	High	High	High	High	13.175	1259.49	27	5.80235e+08	5.34348e+08	5.61776e+08	6.96873e+08	6.89851e+08	6.56657e+08	7.34085e+08	6.96448e+08	7.45423e+08	6.48977e+08	5.87834e+08	6.0615e+08	5.58786e+08	1	6.81127e+08	1	7.25319e+08	1	6.1432e+08	1	0.820385	0.00255442	1.18069	0.00900668
Bo3g006940.1		pep chromosome:v2.1:C3:2450456:2453600:-1 gene:Bo3g006940 transcript:Bo3g006940.1 gene_biotype:protein_coding transcript_biotype:protein_coding	39.5785	18	513	15	1	427	48.3	5.63	High	High	High	High	High	High	High	High	High	High	High	High	4.456	1259.18	18	1.06345e+09	1.01249e+09	9.86294e+08	1.05982e+09	1.05949e+09	1.08178e+09	1.10843e+09	1.09255e+09	1157243190	1.1237e+09	1.04594e+09	1.05625e+09	1.02075e+09	1	1.06703e+09	1	1.11941e+09	1	1.0753e+09	1	0.956624	0.123989	1.04102	0.230301
Bo1g017470.1		pep chromosome:v2.1:C1:6052084:6056881:1 gene:Bo1g017470 transcript:Bo1g017470.1 gene_biotype:protein_coding transcript_biotype:protein_coding	46.6667	32	473	8	1	810	88.7	5.31	High	High	High	High	High	High	High	High	High	High	High	High	4.412	1258.88	32	1.98419e+08	1.88483e+08	1.8283e+08	2.20799e+08	2.23772e+08	2.23842e+08	1.98962e+08	1.87233e+08	1.9748e+08	1.67198e+08	1.55629e+08	1.56166e+08	1.89911e+08	1	2.22804e+08	1	1.94558e+08	1	1.59664e+08	1	0.852366	0.00213383	1.21855	0.00270529
Bo8g093290.1		pep chromosome:v2.1:C8:31996164:31997597:1 gene:Bo8g093290 transcript:Bo8g093290.1 gene_biotype:protein_coding transcript_biotype:protein_coding	51.8405	17	460	2	1	326	35	5.17	High	High	High	High	High	High	High	High	High	High	High	High	6.743	1251.8	17	3.67832e+08	3.67926e+08	6.55028e+08	5.10558e+08	9.15045e+08	4.8601e+08	3.86694e+08	3.78712e+08	3.70121e+08	4.55994e+08	4.38971e+08	4.17767e+08	4.63595e+08	1	6.37204e+08	1	3.78509e+08	1	4.37577e+08	1	0.727546	0.361974	0.86501	0.00802913
Bo9g075680.1		pep chromosome:v2.1:C9:22611741:22615578:1 gene:Bo9g075680 transcript:Bo9g075680.1 gene_biotype:protein_coding transcript_biotype:protein_coding	46.8112	31	476	5	1	784	89	5.05	High	High	High	High	High	High	High	Not Found	Not Found	High	High	High	3.273	1240.64	31	9.31044e+07	6.09909e+07	6.97253e+07	1.19044e+08	1.09362e+08	1.21142e+08	1.0853e+08	NA	NA	9.47669e+07	7.85792e+07	6.73464e+07	7.46069e+07	1	1.16516e+08	1	1.0853e+08	0.333333	8.02308e+07	1	0.640313	0.0149897	1.35272	NA
Bo5g120060.1	T-complex protein 1 subunit delta	pep chromosome:v2.1:C5:36615552:36617153:-1 gene:Bo5g120060 transcript:Bo5g120060.1 gene_biotype:protein_coding transcript_biotype:protein_coding description:T-complex protein 1 subunit delta :UniProtKB/TrEMBL;Acc:A0A0D3CJ11]	61.5385	28	460	5	1	533	57.4	7.44	High	High	High	High	High	High	High	High	High	High	High	High	5.31	1234.81	28	7.6296e+07	9.0283e+07	1.07641e+08	8.83586e+07	9.76164e+07	1.12532e+08	8.56707e+07	9.15736e+07	9.37595e+07	1.08812e+08	9.36319e+07	1.12655e+08	9.14068e+07	1	9.95024e+07	1	9.03346e+07	1	1.05033e+08	1	0.918639	0.519572	0.860061	0.0796548
Bo5g139450.1	60S acidic ribosomal protein P0	pep chromosome:v2.1:C5:43372421:43373845:1 gene:Bo5g139450 transcript:Bo5g139450.1 gene_biotype:protein_coding transcript_biotype:protein_coding description:60S acidic ribosomal protein P0 :UniProtKB/TrEMBL;Acc:A0A0D3CLR0]	52.9412	14	401	2	1	323	34.3	5.15	High	High	High	High	High	High	High	High	High	High	High	High	9	1226.05	14	8.07026e+07	8.45094e+07	8.86106e+07	7.64132e+07	9.96496e+07	7.15055e+07	7.54694e+07	7.43794e+07	6.03789e+07	7.38505e+07	6.63063e+07	6.66128e+07	8.46075e+07	1	8.25228e+07	1	7.00759e+07	1	6.89232e+07	1	1.02526	0.827717	1.01672	0.84279
Bo4g129520.1	Adenosylhomocysteinase	pep chromosome:v2.1:C4:33476142:33477780:-1 gene:Bo4g129520 transcript:Bo4g129520.1 gene_biotype:protein_coding transcript_biotype:protein_coding description:Adenosylhomocysteinase :UniProtKB/TrEMBL;Acc:A0A0D3BYU9]	62.0619	26	507	5	1	485	53.2	5.86	High	High	High	High	High	High	High	High	High	High	High	High	11.253	1223.43	26	3.77347e+08	3.70025e+08	3.4163e+08	3.34113e+08	2.64229e+08	3.25139e+08	3.21129e+08	2.46799e+08	2.71406e+08	3.47907e+08	2.5363e+08	2.43751e+08	3.63001e+08	1	3.07827e+08	1	2.79778e+08	1	2.81763e+08	1	1.17924	0.0875079	0.992957	0.962574
Bo3g004180.1	40S ribosomal protein S4	pep chromosome:v2.1:C3:1517869:1519580:1 gene:Bo3g004180 transcript:Bo3g004180.1 gene_biotype:protein_coding transcript_biotype:protein_coding description:40S ribosomal protein S4 :UniProtKB/TrEMBL;Acc:A0A0D3B033]	72.1374	20	523	4	1	262	29.8	10.18	High	High	High	High	High	High	High	High	High	High	High	High	15.156	1222.68	20	4.17363e+08	4.40976e+08	4.19197e+08	4.02678e+08	4.05954e+08	3.86911e+08	3.42245e+08	3.48766e+08	3.4877e+08	2.99834e+08	2.91971e+08	2.86174e+08	4.25845e+08	1	3.98515e+08	1	3.46594e+08	1	2.9266e+08	1	1.06858	0.046469	1.18429	0.000281674
Bo6g121360.1	Protein disulfide-isomerase	pep chromosome:v2.1:C6:38492842:38495550:1 gene:Bo6g121360 transcript:Bo6g121360.1 gene_biotype:protein_coding transcript_biotype:protein_coding description:Protein disulfide-isomerase :UniProtKB/TrEMBL;Acc:A0A0D3D1E1]	53.7255	26	471	16	1	510	55.7	5.12	High	High	High	High	High	High	High	High	High	High	High	High	5.31	1219.91	26	3.46306e+08	3.13605e+08	3.32749e+08	3.79162e+08	3.89285e+08	3.77418e+08	3.31203e+08	3.14156e+08	324416313	3.17257e+08	3.37959e+08	3.07735e+08	3.30887e+08	1	3.81955e+08	1	3.23258e+08	1	3.20984e+08	1	0.866297	0.00740759	1.00709	0.834544
Bo8g067650.1		pep chromosome:v2.1:C8:21947397:21948610:1 gene:Bo8g067650 transcript:Bo8g067650.1 gene_biotype:protein_coding transcript_biotype:protein_coding	65.4434	20	471	5	1	327	35.6	7.69	High	High	High	High	High	High	High	High	High	High	High	High	9.926	1218.65	20	2.3098e+08	1.91583e+08	1.92985e+08	1.60359e+08	2.12502e+08	2.13677e+08	1.47034e+08	1.4418e+08	1.87038e+08	9.96504e+07	1.77224e+08	1.73335e+08	2.05183e+08	1	1.95513e+08	1	1.59417e+08	1	1.5007e+08	1	1.04946	0.680399	1.06229	0.761595
Bo4g014520.1		pep chromosome:v2.1:C4:1925264:1932862:-1 gene:Bo4g014520 transcript:Bo4g014520.1 gene_biotype:protein_coding transcript_biotype:protein_coding	12.0511	18	458	6	1	1253	138.5	8.09	High	High	High	High	High	High	High	High	High	High	High	High	0.937	1218.49	18	1.29805e+09	1.40921e+09	1.37726e+09	1.07759e+09	1.05122e+09	1.09259e+09	1.11257e+09	1.06358e+09	9.94004e+08	9.05193e+08	9.38478e+08	9.23854e+08	1.36151e+09	1	1.0738e+09	1	1.05672e+09	1	9.22508e+08	1	1.26794	0.00121813	1.14548	0.0198234
Bo4g111270.1	Eukaryotic translation initiation factor 3 subunit E	pep chromosome:v2.1:C4:28324889:28327632:1 gene:Bo4g111270 transcript:Bo4g111270.1 gene_biotype:protein_coding transcript_biotype:protein_coding description:Eukaryotic translation initiation factor 3 subunit E :UniProtKB/TrEMBL;Acc:A0A0D3BXB1]	68.4807	26	575	10	1	441	51.6	5.87	High	High	High	High	High	High	High	High	High	High	High	High	6.444	1215.46	26	2.05495e+08	2.04079e+08	1.93681e+08	2.32342e+08	2.36861e+08	2.31503e+08	2.31425e+08	2.3678e+08	2.35149e+08	2.29723e+08	2.0914e+08	2.26437e+08	2.01085e+08	1	2.33569e+08	1	2.34451e+08	1	2.21767e+08	1	0.860924	0.00134743	1.0572	0.126054
Bo3g009210.1		pep chromosome:v2.1:C3:3097068:3098394:1 gene:Bo3g009210 transcript:Bo3g009210.1 gene_biotype:protein_coding transcript_biotype:protein_coding	37.931	19	536	19	1	377	41.1	9.77	High	High	High	High	High	High	High	High	High	High	High	High	6.356	1213.41	19	3.37005e+09	3.41539e+09	3.33219e+09	3.51572e+09	3.45074e+09	3.39767e+09	2.67284e+09	3.00808e+09	2947889205	2.59408e+09	2.58737e+09	2.70554e+09	3.37254e+09	1	3.45471e+09	1	2.87627e+09	1	2.629e+09	1	0.976216	0.120486	1.09406	0.0879956
Bo3g184270.1		pep chromosome:v2.1:C3:63808436:63810821:-1 gene:Bo3g184270 transcript:Bo3g184270.1 gene_biotype:protein_coding transcript_biotype:protein_coding	64.3478	27	495	2	1	460	51.9	8.7	High	High	High	High	High	High	High	High	High	High	High	High	4.995	1206.44	27	1.20865e+08	1.13057e+08	1.2023e+08	1.23809e+08	1.27225e+08	1.31484e+08	1.34469e+08	1.33e+08	1.44688e+08	1.21945e+08	1.16508e+08	1.26491e+08	1.18051e+08	1	1.27506e+08	1	1.37386e+08	1	1.21648e+08	1	0.925844	0.0475391	1.12937	0.0281055
Bo5g139870.1	Phosphoglycerate mutase, 2,3-bisphosphoglycerate-independent	pep chromosome:v2.1:C5:43573947:43576755:-1 gene:Bo5g139870 transcript:Bo5g139870.1 gene_biotype:protein_coding transcript_biotype:protein_coding description:Phosphoglycerate mutase, 2,3-bisphosphoglycerate-independent :TAIR;Acc:AT3G08590](projected from arabidopsis_thaliana,AT3G08590)	59.2857	29	414	23	1	560	61	5.77	High	High	High	High	High	High	High	High	High	High	High	High	10.22	1204.1	29	2.22676e+08	2.28783e+08	2.16901e+08	2.9516e+08	2.94591e+08	2.83088e+08	1.61563e+08	1.64374e+08	171854306	1.80905e+08	1.8612e+08	1.71211e+08	2.22787e+08	1	2.90946e+08	1	1.6593e+08	1	1.79412e+08	1	0.765732	0.000198351	0.924856	0.0650226
Bo1g139850.1	Lysine--tRNA ligase	pep chromosome:v2.1:C1:40147776:40150866:1 gene:Bo1g139850 transcript:Bo1g139850.1 gene_biotype:protein_coding transcript_biotype:protein_coding description:Lysine--tRNA ligase :UniProtKB/TrEMBL;Acc:A0A0D3AEE9]	54.0453	32	472	10	1	618	70	6.2	High	High	High	High	High	High	High	High	High	High	High	High	5.051	1202.33	32	8.86326e+07	8.15522e+07	9.32321e+07	1.52516e+08	1.56462e+08	1.43443e+08	1.09834e+08	1.07707e+08	1.23876e+08	7.93842e+07	6.76454e+07	6.54218e+07	8.78056e+07	1	1.50807e+08	1	1.13805e+08	1	7.08172e+07	1	0.582239	0.000253947	1.60703	0.00298273
Bo6g076480.1		pep chromosome:v2.1:C6:22399055:22400379:1 gene:Bo6g076480 transcript:Bo6g076480.1 gene_biotype:protein_coding transcript_biotype:protein_coding	49.6933	16	432	1	1	326	35	5.25	High	High	High	High	High	High	Not Found	High	Not Found	High	Not Found	Not Found	6.11	1199.36	16	8.20108e+07	NA	6.84135e+07	9.42787e+07	9.45255e+07	8.7504e+07	NA	3.11382e+07	NA	6.79167e+07	NA	NA	7.52122e+07	0.666667	9.21027e+07	1	3.11382e+07	0.333333	6.79167e+07	0.333333	0.816612	0.0637535	0.458476	NA
Bo1g150180.1	T-complex protein 1 subunit gamma	pep chromosome:v2.1:C1:42170328:42173400:-1 gene:Bo1g150180 transcript:Bo1g150180.1 gene_biotype:protein_coding transcript_biotype:protein_coding description:T-complex protein 1 subunit gamma :UniProtKB/TrEMBL;Acc:A0A0D3AFD9]	57.6577	30	505	30	1	555	60.1	6.02	High	High	High	High	High	High	High	High	High	High	High	High	4.69	1196.16	30	4.10906e+08	4.02469e+08	3.68677e+08	4.60393e+08	4.66514e+08	4.38739e+08	5.06842e+08	4.75004e+08	4.66041e+08	4.89709e+08	4.45138e+08	4.6399e+08	3.94017e+08	1	4.55215e+08	1	4.82629e+08	1	4.66279e+08	1	0.865562	0.0165189	1.03507	0.412503
Bo6g120030.1	ATPase, V1 complex, subunit B protein	pep chromosome:v2.1:C6:37773737:37778306:1 gene:Bo6g120030 transcript:Bo6g120030.1 gene_biotype:protein_coding transcript_biotype:protein_coding description:ATPase, V1 complex, subunit B protein :TAIR;Acc:AT1G76030](projected from arabidopsis_thaliana,AT1G76030)	52.8689	19	386	1	1	488	54.3	5.1	Not Found	Not Found	Not Found	Not Found	Not Found	Not Found	High	High	High	High	High	High	5.391	1195.6	19	NA	NA	NA	NA	NA	NA	7.83708e+07	5.57879e+07	98396137	1.08299e+08	9.2943e+07	6.35114e+07	NA	0	NA	0	7.75183e+07	1	8.82511e+07	1	NA	NA	0.878382	0.583173
Bo1g055110.1	Importin subunit alpha	pep chromosome:v2.1:C1:16057930:16060730:1 gene:Bo1g055110 transcript:Bo1g055110.1 gene_biotype:protein_coding transcript_biotype:protein_coding description:Importin subunit alpha :UniProtKB/TrEMBL;Acc:A0A0D3A7R3]	53.5849	20	401	10	1	530	58.3	5.11	High	High	High	High	High	High	High	High	High	High	High	High	7.058	1192.58	20	2.05765e+08	2.31732e+08	2.11669e+08	2.46882e+08	2.0175e+08	2.4682e+08	2.65078e+08	3.13413e+08	3.0021e+08	2.34397e+08	2.5328e+08	2.42678e+08	2.16389e+08	1	2.31817e+08	1	2.929e+08	1	2.43452e+08	1	0.933445	0.414533	1.20311	0.0327166
Bo1g070760.1		pep chromosome:v2.1:C1:20608279:20609900:1 gene:Bo1g070760 transcript:Bo1g070760.1 gene_biotype:protein_coding transcript_biotype:protein_coding	47.4801	15	449	1	1	377	41.8	5.39	Not Found	High	Not Found	Not Found	High	Not Found	Not Found	Not Found	Not Found	Not Found	Not Found	Not Found	9.965	1191.27	15	NA	NA	NA	NA	NA	NA	NA	NA	NA	NA	NA	NA	NA	0	NA	0	NA	0	NA	0	NA	NA	NA	NA
Bo6g072730.1		pep chromosome:v2.1:C6:20943979:20945625:-1 gene:Bo6g072730 transcript:Bo6g072730.1 gene_biotype:protein_coding transcript_biotype:protein_coding	41.6058	18	406	18	1	548	61.1	9.25	High	High	High	High	High	High	High	High	High	High	High	High	3.467	1190.58	18	4.21258e+08	4.6564e+08	5.0901e+08	4.20094e+08	4.36976e+08	4.8128e+08	3.5426e+08	3.85466e+08	3.75752e+08	3.82066e+08	4.0037e+08	4.06078e+08	4.65302e+08	1	4.46117e+08	1	3.71826e+08	1	3.96171e+08	1	1.04301	0.572078	0.938548	0.106443
Bo01895s010.1		pep scaffold:v2.1:Scaffold01895:1:3052:-1 gene:Bo01895s010 transcript:Bo01895s010.1 gene_biotype:protein_coding transcript_biotype:protein_coding	40.6998	21	438	2	1	543	61.6	7.49	High	High	High	High	High	High	High	High	Not Found	High	High	High	3.489	1185.22	21	1.15031e+08	1.21054e+08	8.67679e+07	9.64104e+07	3.37344e+07	3.27759e+07	3.47762e+07	9.06802e+06	NA	5.37093e+06	2.46335e+07	2.55788e+07	1.07618e+08	1	5.43069e+07	1	2.19221e+07	0.666667	1.85277e+07	1	1.98166	0.0863924	1.18321	0.808159
Bo3g039510.1		pep chromosome:v2.1:C3:15816420:15816893:1 gene:Bo3g039510 transcript:Bo3g039510.1 gene_biotype:protein_coding transcript_biotype:protein_coding	52.8662	8	617	3	1	157	17.7	9.8	High	High	High	High	High	High	High	High	High	High	High	High	3.217	1185.14	8	1.3742e+08	2.3715e+08	2.53023e+08	3.11046e+08	2.96761e+08	4.45518e+08	5.42757e+08	4.78927e+08	2.90171e+08	2.1717e+08	2.78448e+08	2.9497e+08	2.09198e+08	1	3.51108e+08	1	4.37285e+08	1	2.63529e+08	1	0.595821	0.0759617	1.65934	0.0939699
Bo9g010410.1		pep chromosome:v2.1:C9:3064418:3068190:1 gene:Bo9g010410 transcript:Bo9g010410.1 gene_biotype:protein_coding transcript_biotype:protein_coding	38.5965	23	401	15	1	684	75.2	5.6	High	High	High	High	High	High	High	High	High	High	High	High	3.642	1180.91	23	3.63499e+08	3.87648e+08	4.02712e+08	4.66983e+08	3.91494e+08	4.92653e+08	3.80439e+08	3.72543e+08	3.69049e+08	3.16021e+08	3.78391e+08	3.02753e+08	3.8462e+08	1	4.50377e+08	1	3.7401e+08	1	3.32388e+08	1	0.853995	0.112565	1.12522	0.152035
Bo6g049540.1		pep chromosome:v2.1:C6:13583200:13584612:-1 gene:Bo6g049540 transcript:Bo6g049540.1 gene_biotype:protein_coding transcript_biotype:protein_coding	47.4801	14	408	1	1	377	41.6	5.4	Not Found	High	Not Found	Not Found	Not Found	Not Found	Not Found	Not Found	High	Not Found	Not Found	Not Found	9	1179.58	14	NA	1.00836e+07	NA	NA	NA	NA	NA	NA	5.67689e+06	NA	NA	NA	1.00836e+07	0.333333	NA	0	5.67689e+06	0.333333	NA	0	NA	NA	NA	NA
Bo4g198600.1		pep chromosome:v2.1:C4:53521431:53525386:-1 gene:Bo4g198600 transcript:Bo4g198600.1 gene_biotype:protein_coding transcript_biotype:protein_coding	36.0673	26	425	8	1	951	105.2	6.21	High	High	High	High	High	High	High	High	High	High	High	High	2.325	1179.47	26	4.69223e+07	5.58934e+07	6.59665e+07	5.37959e+07	6.3031e+07	6.91741e+07	8.2051e+07	7.93936e+07	7.44274e+07	8.29339e+07	7.60927e+07	7.79331e+07	5.62608e+07	1	6.20004e+07	1	7.8624e+07	1	7.89866e+07	1	0.907426	0.463457	0.99541	0.910469
Bo5g135100.1		pep chromosome:v2.1:C5:42022001:42025266:-1 gene:Bo5g135100 transcript:Bo5g135100.1 gene_biotype:protein_coding transcript_biotype:protein_coding	51.4337	26	443	1	1	558	59.8	6.05	High	High	High	High	High	High	High	High	High	High	High	High	4.766	1176.81	26	4.76332e+07	4.76237e+07	4.73679e+07	5.0473e+07	5.04633e+07	4.75508e+07	5.40843e+07	5.96471e+07	61239683	4.8519e+07	5.14792e+07	4.68435e+07	4.75416e+07	1	4.94957e+07	1	5.83237e+07	1	4.89473e+07	1	0.96052	0.115928	1.19156	0.0214636
Bo4g187100.1		pep chromosome:v2.1:C4:49861690:49862979:1 gene:Bo4g187100 transcript:Bo4g187100.1 gene_biotype:protein_coding transcript_biotype:protein_coding	47.4801	15	431	2	1	377	41.8	5.31	High	Not Found	Not Found	High	High	Not Found	Not Found	Not Found	High	Not Found	High	Not Found	9.965	1176.36	15	NA	NA	NA	1.43702e+07	1.50999e+07	NA	NA	NA	3.55316e+07	NA	1.83544e+07	NA	NA	0	1.47351e+07	0.666667	3.55316e+07	0.333333	1.83544e+07	0.333333	NA	NA	1.93586	NA
Bo4g140480.1		pep chromosome:v2.1:C4:37926484:37927549:-1 gene:Bo4g140480 transcript:Bo4g140480.1 gene_biotype:protein_coding transcript_biotype:protein_coding	70.0361	13	412	2	1	277	30.4	8.32	High	High	High	High	High	High	High	High	High	High	High	High	12.689	1174.2	13	2.63135e+08	2.42783e+08	2.5321e+08	3.21749e+08	3.29807e+08	3.00677e+08	2.9791e+08	2.97992e+08	2.90629e+08	3.5855e+08	3.54109e+08	3.31507e+08	2.53042e+08	1	3.17411e+08	1	2.9551e+08	1	3.48055e+08	1	0.797208	0.00356942	0.849032	0.00382421
Bo8g071060.1	Protein disulfide-isomerase	pep chromosome:v2.1:C8:23494755:23497336:1 gene:Bo8g071060 transcript:Bo8g071060.1 gene_biotype:protein_coding transcript_biotype:protein_coding description:Protein disulfide-isomerase :UniProtKB/TrEMBL;Acc:A0A0D3DQU3]	62.4	28	460	20	1	500	55.7	4.94	High	High	High	High	High	High	High	High	High	High	High	High	7.377	1174.06	28	2.00632e+08	2.10575e+08	1.99562e+08	3.09762e+08	3.23334e+08	3.12505e+08	2.11662e+08	2.0529e+08	2.03585e+08	1.97146e+08	2.08233e+08	2.0994e+08	2.0359e+08	1	3.15201e+08	1	2.06846e+08	1	2.05107e+08	1	0.645905	3.3033e-05	1.00848	0.730294
Bo4g108320.1	Ketol-acid reductoisomerase	pep chromosome:v2.1:C4:27486236:27489219:-1 gene:Bo4g108320 transcript:Bo4g108320.1 gene_biotype:protein_coding transcript_biotype:protein_coding description:Ketol-acid reductoisomerase :UniProtKB/TrEMBL;Acc:A0A0D3D811]	31.5789	17	383	6	1	589	63.5	6.7	High	High	High	High	High	High	High	High	High	High	High	High	3.281	1171.88	17	2.67247e+08	2.88472e+08	3.19156e+08	3.20469e+08	3.29899e+08	3.092e+08	2.12362e+08	2.23317e+08	236387165	1.79307e+08	2.10427e+08	2.39749e+08	2.91625e+08	1	3.19856e+08	1	2.24022e+08	1	2.09828e+08	1	0.911738	0.156586	1.06765	0.491865
Bo2g041840.1		pep chromosome:v2.1:C2:11415746:11418048:-1 gene:Bo2g041840 transcript:Bo2g041840.1 gene_biotype:protein_coding transcript_biotype:protein_coding	39.8515	15	473	4	1	404	43.6	9.04	High	Not Found	Not Found	High	High	High	High	High	High	High	Not Found	High	3.084	1170.77	15	9.20807e+06	NA	NA	1.08634e+07	NA	1.73985e+07	1.37014e+07	1.75362e+07	1.21811e+07	1.74953e+07	NA	1.73036e+07	9.20807e+06	0.333333	1.4131e+07	0.666667	1.44729e+07	1	1.73994e+07	0.666667	0.651624	NA	0.831803	0.250187
Bo6g050610.1		pep chromosome:v2.1:C6:13704029:13710493:-1 gene:Bo6g050610 transcript:Bo6g050610.1 gene_biotype:protein_coding transcript_biotype:protein_coding	40.1494	27	488	2	1	1071	120	7.14	High	High	High	High	High	High	High	High	High	High	High	High	1.424	1167.97	27	1.80331e+08	1.43496e+08	1.6523e+08	1.29498e+08	1.45719e+08	1.68181e+08	1.38815e+08	1.34021e+08	1.44413e+08	1.48682e+08	1.54768e+08	1.3883e+08	1.63019e+08	1	1.47799e+08	1	1.39083e+08	1	1.47427e+08	1	1.10298	0.381572	0.943406	0.205862
Bo3g155790.1	Aconitate hydratase	pep chromosome:v2.1:C3:55763747:55768604:-1 gene:Bo3g155790 transcript:Bo3g155790.1 gene_biotype:protein_coding transcript_biotype:protein_coding description:Aconitate hydratase :UniProtKB/TrEMBL;Acc:A0A0D3BK76]	40.2004	27	437	6	1	898	98.1	5.95	High	High	High	High	High	High	High	High	High	High	High	High	2.49	1165.31	27	7.55426e+07	8.0037e+07	8.13844e+07	9.37404e+07	7.88741e+07	6.84335e+07	2.62503e+07	4.85745e+07	4.53812e+07	3.5912e+07	4.73195e+07	3.88695e+07	7.8988e+07	1	8.03493e+07	1	4.00686e+07	1	4.07003e+07	1	0.983057	0.865711	0.98448	0.93906
Bo4g161240.1		pep chromosome:v2.1:C4:43622361:43627018:-1 gene:Bo4g161240 transcript:Bo4g161240.1 gene_biotype:protein_coding transcript_biotype:protein_coding	45.4839	39	483	15	1	930	104	8.78	High	High	High	High	High	High	High	High	High	High	High	High	3.354	1155.99	39	2.29754e+08	1.99796e+08	2.22311e+08	1.76587e+08	1.83257e+08	1.81385e+08	2.75918e+08	2.784e+08	2.82269e+08	2.25429e+08	2.16289e+08	2.18988e+08	2.17287e+08	1	1.8041e+08	1	2.78862e+08	1	2.20235e+08	1	1.20441	0.0161464	1.2662	5.76373e-05
Bo6g122400.1		pep chromosome:v2.1:C6:39080508:39084296:1 gene:Bo6g122400 transcript:Bo6g122400.1 gene_biotype:protein_coding transcript_biotype:protein_coding	53.6116	30	432	2	1	623	68.6	5.25	High	High	High	High	High	High	High	High	High	High	High	High	4.495	1155.72	30	2.04426e+08	1.98165e+08	1.63543e+08	2.38965e+08	2.22064e+08	2.15445e+08	4.09507e+08	3.97e+08	395150804	4.57632e+08	4.35251e+08	4.6336e+08	1.88711e+08	1	2.25491e+08	1	4.00553e+08	1	4.52081e+08	1	0.836891	0.064388	0.886021	0.00601293
Bo5g068120.1	BGAL15 description	pep chromosome:v2.1:C5:21401569:21405943:-1 gene:Bo5g068120 transcript:Bo5g068120.1 gene_biotype:protein_coding transcript_biotype:protein_coding gene_symbol:BGAL15 description:beta-galactosidase 15 :TAIR;Acc:AT1G31740](projected from arabidopsis_thaliana,AT1G31740)	30.9379	20	425	20	1	821	92.1	5.9	High	High	High	High	High	High	High	High	High	High	High	High	2.643	1154.64	20	5.02115e+08	5.41737e+08	5.05361e+08	2.49442e+08	2.65367e+08	2.56282e+08	3.63537e+08	3.67261e+08	3.62515e+08	3.10983e+08	3.27965e+08	3.17497e+08	5.16404e+08	1	2.5703e+08	1	3.64438e+08	1	3.18815e+08	1	2.00912	4.34078e-05	1.1431	0.000898262
Bo1g139790.1		pep chromosome:v2.1:C1:40087217:40090603:-1 gene:Bo1g139790 transcript:Bo1g139790.1 gene_biotype:protein_coding transcript_biotype:protein_coding	50.4488	26	441	1	1	557	59.7	6.39	Not Found	Not Found	High	High	High	High	High	High	High	High	High	High	4.766	1149.57	26	NA	NA	1.38786e+08	1.53835e+08	1.56017e+08	1.53464e+08	1.41211e+08	1.39338e+08	1.25692e+08	1.66612e+08	1.44298e+08	1.38705e+08	1.38786e+08	0.333333	1.54439e+08	1	1.35414e+08	1	1.49871e+08	1	0.898647	NA	0.903532	0.21523
Bo6g087090.1		pep chromosome:v2.1:C6:27426828:27429940:1 gene:Bo6g087090 transcript:Bo6g087090.1 gene_biotype:protein_coding transcript_biotype:protein_coding	44.7974	37	421	9	1	913	101	6.06	High	High	High	High	High	High	High	High	High	High	High	High	3.317	1148.57	37	5.85423e+07	5.3826e+07	6.32393e+07	1.06573e+08	1.10454e+08	1.19647e+08	8.85719e+07	8.57959e+07	8.45959e+07	8.73955e+07	8.015e+07	7.20454e+07	5.85359e+07	1	1.12225e+08	1	8.63212e+07	1	7.98636e+07	1	0.521595	0.000344632	1.08086	0.231967
Bo8g023140.1	Adenosylhomocysteinase	pep chromosome:v2.1:C8:5833195:5835068:1 gene:Bo8g023140 transcript:Bo8g023140.1 gene_biotype:protein_coding transcript_biotype:protein_coding description:Adenosylhomocysteinase :UniProtKB/TrEMBL;Acc:A0A0D3DKC2]	62.0619	26	493	5	1	485	53.2	5.86	High	High	High	High	High	High	High	High	High	High	High	High	10.45	1148.36	26	2.38447e+08	2.31303e+08	1.91047e+08	2.9955e+08	2.74667e+08	2.67778e+08	2.65427e+08	2.62489e+08	2.5811e+08	1.76262e+08	2.57776e+08	2.47447e+08	2.20266e+08	1	2.80665e+08	1	2.62009e+08	1	2.27162e+08	1	0.784799	0.0266329	1.1534	0.246806
Bo7g061770.1	GDSL-like Lipase/Acylhydrolase family protein	pep chromosome:v2.1:C7:22823498:22827923:-1 gene:Bo7g061770 transcript:Bo7g061770.1 gene_biotype:protein_coding transcript_biotype:protein_coding description:GDSL-like Lipase/Acylhydrolase family protein :TAIR;Acc:AT1G20135](projected from arabidopsis_thaliana,AT1G20135)	15.006	9	363	8	1	833	89	9.36	High	High	High	High	High	High	High	High	High	High	High	High	1.404	1146.11	9	2.09989e+09	2.14817e+09	2.10289e+09	9.30025e+08	8.98171e+08	9.18977e+08	1.53225e+09	1.3817e+09	1510706020	1.80655e+09	1.72835e+09	1.76625e+09	2.11698e+09	1	9.15724e+08	1	1.47489e+09	1	1.76705e+09	1	2.31181	3.15461e-07	0.834661	0.00498285
Bo3g023240.1		pep chromosome:v2.1:C3:8360389:8361807:1 gene:Bo3g023240 transcript:Bo3g023240.1 gene_biotype:protein_coding transcript_biotype:protein_coding	37.1353	14	394	4	1	377	42.3	5.41	High	High	High	High	High	High	High	High	High	High	High	High	4.995	1141.24	14	6.17813e+08	5.36435e+08	5.56505e+08	6.95216e+08	9.81043e+08	9.68878e+08	6.98793e+08	6.35797e+08	9.68471e+08	6.90927e+08	6.96e+08	6.68365e+08	5.70251e+08	1	8.81712e+08	1	7.67687e+08	1	6.85098e+08	1	0.646754	0.0320197	1.12055	0.465068
Bo1g117750.1	T-complex protein 1 subunit delta	pep chromosome:v2.1:C1:35441580:35443920:1 gene:Bo1g117750 transcript:Bo1g117750.1 gene_biotype:protein_coding transcript_biotype:protein_coding description:T-complex protein 1 subunit delta :UniProtKB/TrEMBL;Acc:A0A0D3ACM3]	51.3302	28	441	5	1	639	69.3	7.85	High	High	High	High	High	High	High	High	High	High	High	High	3.329	1141.01	28	1.83241e+08	1.21159e+08	1.30655e+08	1.41712e+08	1.36483e+08	1.67584e+08	1.33833e+08	1.2946e+08	2.03832e+08	1.68396e+08	1.81579e+08	1.60597e+08	1.45018e+08	1	1.48593e+08	1	1.55708e+08	1	1.70191e+08	1	0.975941	0.876395	0.914903	0.591454
Bo4g191660.1	P-loop containing nucleoside triphosphate hydrolases superfamily protein	pep chromosome:v2.1:C4:51916659:51918955:1 gene:Bo4g191660 transcript:Bo4g191660.1 gene_biotype:protein_coding transcript_biotype:protein_coding description:P-loop containing nucleoside triphosphate hydrolases superfamily protein :TAIR;Acc:AT2G42520](projected from arabidopsis_thaliana,AT2G42520)	43.9344	26	453	9	1	610	66.3	8.07	High	High	High	High	High	High	High	High	High	High	High	High	6.305	1135.88	26	9.15725e+07	7.20617e+07	1.31409e+08	1.24936e+08	1.62122e+08	1.646e+08	1.80717e+08	1.81349e+08	1.81674e+08	1.7864e+08	1.79689e+08	1.69755e+08	9.83477e+07	1	1.50552e+08	1	1.81247e+08	1	1.76028e+08	1	0.653246	0.073621	1.02965	0.174328
Bo2g167770.1	Succinate dehydrogenase [ubiquinone] flavoprotein subunit, mitochondrial	pep chromosome:v2.1:C2:52479469:52482597:1 gene:Bo2g167770 transcript:Bo2g167770.1 gene_biotype:protein_coding transcript_biotype:protein_coding description:Succinate dehydrogenase [ubiquinone] flavoprotein subunit, mitochondrial :UniProtKB/TrEMBL;Acc:A0A0D3AYU8]	42.8344	22	386	22	1	628	69.1	6.33	High	High	High	High	High	High	High	High	High	High	High	High	3.715	1133.58	22	3.71033e+08	3.50366e+08	3.40367e+08	4.0305e+08	3.81465e+08	3.989e+08	3.80071e+08	3.88141e+08	333800842	4.04233e+08	3.6956e+08	4.08792e+08	3.53922e+08	1	3.94472e+08	1	3.67338e+08	1	3.94195e+08	1	0.897205	0.022295	0.931867	0.269645
Bo8g111030.1		pep chromosome:v2.1:C8:39579709:39583119:1 gene:Bo8g111030 transcript:Bo8g111030.1 gene_biotype:protein_coding transcript_biotype:protein_coding	53.4133	46	415	29	1	1084	122.9	6.19	High	High	High	High	High	High	High	High	High	High	High	High	3.066	1131.3	46	2.23696e+08	2.16624e+08	2.12133e+08	2.59656e+08	2.4505e+08	2.44466e+08	2.10453e+08	2.09179e+08	2.09534e+08	1.87253e+08	1.74298e+08	1.83873e+08	2.17484e+08	1	2.49724e+08	1	2.09722e+08	1	1.81808e+08	1	0.870898	0.00579927	1.15354	0.00201314
Bo3g064610.1		pep chromosome:v2.1:C3:24772973:24776831:1 gene:Bo3g064610 transcript:Bo3g064610.1 gene_biotype:protein_coding transcript_biotype:protein_coding	50.3584	26	439	1	1	558	59.9	6.21	High	High	High	High	High	High	High	High	High	High	High	High	4.766	1129.76	26	6.58438e+07	5.9453e+07	5.96799e+07	6.95223e+07	7.69024e+07	6.83537e+07	6.76324e+07	6.7805e+07	7.06211e+07	7.08976e+07	7.06695e+07	7.36729e+07	6.16589e+07	1	7.15928e+07	1	6.86862e+07	1	7.17467e+07	1	0.861244	0.043084	0.957343	0.0888373
Bo6g067090.1	Pyruvate kinase	pep chromosome:v2.1:C6:18486580:18490167:1 gene:Bo6g067090 transcript:Bo6g067090.1 gene_biotype:protein_coding transcript_biotype:protein_coding description:Pyruvate kinase :UniProtKB/TrEMBL;Acc:A0A0D3CTI7]	56.926	28	425	3	1	527	57.4	7.27	High	High	High	High	High	High	High	High	High	High	High	High	6.356	1128.91	28	1.6697e+08	1.17693e+08	1.59391e+08	1.46367e+08	1.72594e+08	1.53928e+08	1.44326e+08	1.64244e+08	1.66754e+08	1.49057e+08	1.0503e+08	1.43327e+08	1.48018e+08	1	1.57629e+08	1	1.58442e+08	1	1.32471e+08	1	0.939026	0.605866	1.19605	0.169883
Bo3g064230.1		pep chromosome:v2.1:C3:24509916:24511481:-1 gene:Bo3g064230 transcript:Bo3g064230.1 gene_biotype:protein_coding transcript_biotype:protein_coding	35.545	10	379	1	1	211	23.4	10.52	High	High	High	High	High	High	High	High	High	High	High	High	26.384	1128.74	10	2.75059e+09	2.71155e+09	2.58818e+09	2.20834e+09	2.09162e+09	2.12809e+09	2.34065e+09	2.44286e+09	2524839556	2.95503e+09	2.66042e+09	2.89974e+09	2.68344e+09	1	2.14268e+09	1	2.43612e+09	1	2.83839e+09	1	1.25237	0.000832243	0.858273	0.0185626
Bo1g090260.1	ADL3 description	pep chromosome:v2.1:C1:26595280:26602277:1 gene:Bo1g090260 transcript:Bo1g090260.1 gene_biotype:protein_coding transcript_biotype:protein_coding gene_symbol:ADL3 description:dynamin-like 3 :TAIR;Acc:AT1G59610](projected from arabidopsis_thaliana,AT1G59610)	43.8043	37	425	10	1	920	100	8.92	High	High	High	High	High	High	High	High	High	High	High	High	2.712	1125.71	37	2.32259e+07	3.43689e+07	2.77802e+08	2.91108e+08	2.53806e+08	5.32832e+07	1.89466e+08	2.06076e+08	217096161	2.21064e+08	2.37783e+08	2.4333e+08	1.11799e+08	1	1.99399e+08	1	2.04213e+08	1	2.34059e+08	1	0.56068	0.474683	0.872484	0.046149
Bo4g032370.1	ubiquitin 12	pep chromosome:v2.1:C4:7247407:7247871:-1 gene:Bo4g032370 transcript:Bo4g032370.1 gene_biotype:protein_coding transcript_biotype:protein_coding description:ubiquitin 12 :Projected from Arabidopsis thaliana (AT1G55060) TAIR;Acc:AT1G55060]	69.4805	6	593	1	1	154	17.3	7.4	Not Found	Not Found	Not Found	Not Found	Not Found	Not Found	Not Found	Not Found	High	Not Found	Not Found	Not Found	1.336	1120.86	6	NA	NA	NA	NA	NA	NA	NA	NA	27150822	NA	NA	NA	NA	0	NA	0	27150822	0.333333	NA	0	NA	NA	NA	NA
Bo3g147780.1		pep chromosome:v2.1:C3:52700393:52701532:1 gene:Bo3g147780 transcript:Bo3g147780.1 gene_biotype:protein_coding transcript_biotype:protein_coding	42.1739	9	395	1	1	230	25	4.56	High	High	High	High	High	High	High	High	High	High	High	High	12.335	1120.02	9	4.14293e+08	4.10781e+08	4.16981e+08	4.79467e+08	5.0538e+08	5.2897e+08	4.74548e+08	5.13087e+08	5.30719e+08	3.88615e+08	3.89035e+08	4.26704e+08	4.14018e+08	1	5.04606e+08	1	5.06118e+08	1	4.01451e+08	1	0.820479	0.00326865	1.26072	0.00737918
Bo3g053060.1	S-adenosylmethionine synthase	pep chromosome:v2.1:C3:21039711:21040959:1 gene:Bo3g053060 transcript:Bo3g053060.1 gene_biotype:protein_coding transcript_biotype:protein_coding description:S-adenosylmethionine synthase :UniProtKB/TrEMBL;Acc:A0A0D3B8Y9]	54.8469	17	378	1	1	392	43	6.24	Not Found	High	High	Not Found	High	High	Not Found	High	High	High	High	High	7.532	1112.43	17	NA	3.91728e+07	5.00279e+07	NA	7.88216e+07	8.87573e+07	NA	3.44442e+07	35673081	6.67022e+07	5.36774e+07	6.70228e+07	4.46003e+07	0.666667	8.37894e+07	0.666667	3.50586e+07	0.666667	6.24675e+07	1	0.532291	0.0334899	0.561231	0.017073
Bo6g118620.1		pep chromosome:v2.1:C6:36991001:36994712:-1 gene:Bo6g118620 transcript:Bo6g118620.1 gene_biotype:protein_coding transcript_biotype:protein_coding	41.3831	34	397	6	1	911	101	6.33	High	High	High	High	High	High	High	High	High	High	High	High	2.861	1110.17	34	6.27126e+07	7.39382e+07	7.55018e+07	1.57301e+08	1.57576e+08	1.28846e+08	7.41359e+07	7.96764e+07	2.93529e+07	9.14654e+07	9.39298e+07	8.63249e+07	7.07175e+07	1	1.47908e+08	1	6.1055e+07	1	9.05734e+07	1	0.478119	0.0017253	0.674095	0.140448
Bo4g191690.1		pep chromosome:v2.1:C4:51928794:51933994:-1 gene:Bo4g191690 transcript:Bo4g191690.1 gene_biotype:protein_coding transcript_biotype:protein_coding	42.3237	37	433	21	1	964	109.9	6.11	High	High	High	High	High	High	High	High	High	High	High	High	2.421	1108.09	37	1.0745e+08	1.39529e+08	1.39021e+08	1.42203e+08	1.45898e+08	1.48294e+08	1.06028e+08	1.03552e+08	1.10521e+08	1.20151e+08	1.13551e+08	1.2244e+08	1.28667e+08	1	1.45465e+08	1	1.067e+08	1	1.18714e+08	1	0.884517	0.193374	0.898803	0.023174
Bo3g031560.1		pep chromosome:v2.1:C3:11716438:11716938:-1 gene:Bo3g031560 transcript:Bo3g031560.1 gene_biotype:protein_coding transcript_biotype:protein_coding	62.0482	8	388	1	1	166	18	8.97	High	High	High	High	High	High	High	High	High	High	High	High	4.623	1103.77	8	7.22876e+07	6.36935e+07	5.99315e+07	1.23038e+07	6.21913e+07	7.9461e+07	6.16287e+07	4.52283e+07	53567002	6.9282e+07	6.74596e+07	7.40531e+07	6.53042e+07	1	5.13187e+07	1	5.34747e+07	1	7.02649e+07	1	1.27252	0.531872	0.761044	0.0306391
Bo7g107190.1		pep chromosome:v2.1:C7:41879779:41888779:-1 gene:Bo7g107190 transcript:Bo7g107190.1 gene_biotype:protein_coding transcript_biotype:protein_coding	28.9511	39	443	10	1	1392	153.6	6.46	High	High	High	High	High	High	High	High	High	High	High	High	1.606	1102.08	39	1.27574e+08	1.15151e+08	1.24627e+08	1.35212e+08	1.34642e+08	1.41147e+08	1.06422e+08	1.06885e+08	1.07095e+08	1.21746e+08	1.34453e+08	1.44199e+08	1.22451e+08	1	1.37e+08	1	1.06801e+08	1	1.33466e+08	1	0.893798	0.0274091	0.800209	0.0148511
Bo4g129530.1	Serine hydroxymethyltransferase	pep chromosome:v2.1:C4:33490587:33492551:1 gene:Bo4g129530 transcript:Bo4g129530.1 gene_biotype:protein_coding transcript_biotype:protein_coding description:Serine hydroxymethyltransferase :UniProtKB/TrEMBL;Acc:A0A0D3BYV0]	63.2696	22	359	3	1	471	51.5	7.47	High	High	High	High	High	High	High	High	High	High	High	High	6.686	1097.58	22	4.19752e+07	4.30731e+07	3.98315e+07	6.20179e+07	6.21853e+07	5.78754e+07	5.35955e+07	6.15582e+07	6.51145e+07	4.12635e+07	3.8809e+07	3.88269e+07	4.16266e+07	1	6.06929e+07	1	6.00894e+07	1	3.96332e+07	1	0.685856	0.000360626	1.51614	0.00428064
Bo7g119070.1		pep chromosome:v2.1:C7:47928067:47930235:-1 gene:Bo7g119070 transcript:Bo7g119070.1 gene_biotype:protein_coding transcript_biotype:protein_coding	47.5069	27	364	1	1	722	79.7	5.99	Not Found	Not Found	High	Not Found	Not Found	Not Found	High	Not Found	Not Found	Not Found	Not Found	High	3.262	1097.01	27	NA	NA	2.93933e+07	NA	NA	NA	3.75551e+07	NA	NA	NA	NA	2.98869e+07	2.93933e+07	0.333333	NA	0	3.75551e+07	0.333333	2.98869e+07	0.333333	NA	NA	1.25657	NA
Bo1g037840.1		pep chromosome:v2.1:C1:11596442:11599353:1 gene:Bo1g037840 transcript:Bo1g037840.1 gene_biotype:protein_coding transcript_biotype:protein_coding	40.1685	29	451	9	1	712	76	5.35	High	High	High	High	High	High	High	High	High	High	High	High	2.562	1095.26	29	2.71621e+08	3.0526e+08	2.7967e+08	4.14133e+08	3.98592e+08	3.58336e+08	3.15062e+08	3.35632e+08	3.49471e+08	2.67173e+08	2.86131e+08	2.80968e+08	2.85517e+08	1	3.90354e+08	1	3.33388e+08	1	2.78091e+08	1	0.731431	0.00575607	1.19885	0.0085596
Bo9g009830.1	ATP citrate lyase subunit B 2	pep chromosome:v2.1:C9:2773281:2776237:1 gene:Bo9g009830 transcript:Bo9g009830.1 gene_biotype:protein_coding transcript_biotype:protein_coding description:ATP citrate lyase subunit B 2 :Projected from Arabidopsis thaliana (AT5G49460) TAIR;Acc:AT5G49460]	47.8618	25	380	25	1	608	65.7	7.83	High	High	High	High	High	High	High	High	High	High	High	High	4.696	1093.57	25	2.80478e+08	2.89265e+08	2.99339e+08	3.52392e+08	3.32874e+08	3.39996e+08	3.76227e+08	3.72046e+08	3.38969e+08	4.07567e+08	3.68696e+08	3.79775e+08	2.89694e+08	1	3.41754e+08	1	3.62414e+08	1	3.85346e+08	1	0.847668	0.00272995	0.94049	0.237149
Bo6g010830.1	mtLPD1 description	pep chromosome:v2.1:C6:2380368:2382437:-1 gene:Bo6g010830 transcript:Bo6g010830.1 gene_biotype:protein_coding transcript_biotype:protein_coding gene_symbol:mtLPD1 description:mitochondrial lipoamide dehydrogenase 1 :TAIR;Acc:AT1G48030](projected from arabidopsis_thaliana,AT1G48030)	39.1081	21	423	11	1	583	62.9	8.63	High	High	High	High	High	High	High	High	High	High	High	High	4.289	1087.4	21	2.77399e+08	2.71285e+08	2.70196e+08	3.5451e+08	3.58119e+08	3.44078e+08	3.7558e+08	3.79403e+08	402955422	3.35935e+08	3.10093e+08	3.39177e+08	2.7296e+08	1	3.52236e+08	1	3.85979e+08	1	3.28402e+08	1	0.774937	7.67563e-05	1.17533	0.0101715
Bo2g028690.1		pep chromosome:v2.1:C2:8582732:8584775:-1 gene:Bo2g028690 transcript:Bo2g028690.1 gene_biotype:protein_coding transcript_biotype:protein_coding	52.7228	20	465	1	1	404	45.4	5.5	High	High	High	High	High	High	High	High	High	High	High	High	9.723	1087.27	20	8.48457e+07	9.47497e+07	9.36192e+07	1.39092e+08	1.15367e+08	1.4012e+08	9.02443e+07	2.59874e+07	1.1123e+08	9.86091e+07	1.0346e+08	1.12984e+08	9.10715e+07	1	1.31527e+08	1	7.58205e+07	1	1.05018e+08	1	0.692419	0.00954515	0.721979	0.324093
Bo1g141010.1		pep chromosome:v2.1:C1:40260917:40262009:1 gene:Bo1g141010 transcript:Bo1g141010.1 gene_biotype:protein_coding transcript_biotype:protein_coding	50	10	368	1	1	150	16.3	10.7	High	High	High	High	High	High	High	High	High	High	High	High	99	1086.78	10	8.1555e+08	8.18683e+08	7.95332e+08	6.79508e+08	6.93858e+08	7.16025e+08	8.47113e+08	7.95842e+08	8.61158e+08	9.87813e+08	1.00904e+09	8.73166e+08	8.09855e+08	1	6.96464e+08	1	8.34705e+08	1	9.56673e+08	1	1.16281	0.000923388	0.872508	0.059088
Bo8g115710.1		pep chromosome:v2.1:C8:40909455:40911538:-1 gene:Bo8g115710 transcript:Bo8g115710.1 gene_biotype:protein_coding transcript_biotype:protein_coding	44.7312	19	392	1	1	465	50.7	8.85	High	High	High	High	High	High	High	High	High	High	High	High	6.128	1085.73	19	2.98898e+08	3.7397e+08	3.53656e+08	4.26574e+08	3.60852e+08	3.79289e+08	3.8904e+08	4.38243e+08	4.09619e+08	3.13078e+08	3.67853e+08	3.30967e+08	3.42174e+08	1	3.88905e+08	1	4.123e+08	1	3.37299e+08	1	0.87984	0.191448	1.22236	0.0252737
Bo3g185790.1		pep chromosome:v2.1:C3:64920443:64922729:-1 gene:Bo3g185790 transcript:Bo3g185790.1 gene_biotype:protein_coding transcript_biotype:protein_coding	51.0557	27	483	2	1	521	58.4	8.69	High	Not Found	High	High	High	High	High	High	High	High	High	High	7.938	1078.58	27	8.13145e+07	NA	1.44963e+07	2.0844e+07	7.64082e+07	2.16301e+07	3.25917e+07	3.09851e+07	5.00865e+07	6.47613e+07	7.75075e+07	5.44703e+07	4.79054e+07	0.666667	3.96274e+07	1	3.78878e+07	1	6.55797e+07	1	1.20889	0.825379	0.577736	0.0376
Bo6g064740.1		pep chromosome:v2.1:C6:17172132:17173319:-1 gene:Bo6g064740 transcript:Bo6g064740.1 gene_biotype:protein_coding transcript_biotype:protein_coding	70.0361	13	377	2	1	277	30.4	8.32	High	High	High	High	High	High	High	High	High	High	High	High	11.328	1077.18	13	1.75785e+08	3.11099e+08	1.54514e+08	3.93908e+08	2.01757e+08	1.97544e+08	3.6728e+08	1.92186e+08	1.96906e+08	2.41912e+08	4.3192e+08	2.23082e+08	2.13799e+08	1	2.64403e+08	1	2.52124e+08	1	2.98971e+08	1	0.808612	0.567081	0.843305	0.623142
Bo00955s050.1		pep scaffold:v2.1:Scaffold00955:34624:35681:-1 gene:Bo00955s050 transcript:Bo00955s050.1 gene_biotype:protein_coding transcript_biotype:protein_coding	59.5331	18	430	5	1	257	28.9	4.79	High	High	High	High	High	High	High	High	High	High	High	High	9.965	1074.97	18	2.05926e+08	2.0327e+08	2.01495e+08	2.72887e+08	2.68528e+08	2.54751e+08	2.49314e+08	2.28538e+08	2.44447e+08	2.86161e+08	2.80683e+08	2.71243e+08	2.03564e+08	1	2.65389e+08	1	2.40766e+08	1	2.79362e+08	1	0.767039	0.000386834	0.861842	0.00721499
Bo6g080970.1	Glyceraldehyde-3-phosphate dehydrogenase	pep chromosome:v2.1:C6:24841581:24844500:1 gene:Bo6g080970 transcript:Bo6g080970.1 gene_biotype:protein_coding transcript_biotype:protein_coding description:Glyceraldehyde-3-phosphate dehydrogenase :UniProtKB/TrEMBL;Acc:A0A0D3CVT1]	51.3064	18	361	2	1	421	44.4	8.62	High	High	High	High	High	High	High	High	High	High	High	High	3.948	1074.13	18	4.46742e+07	3.39126e+07	5.19513e+07	5.10442e+07	2.14861e+07	1.83399e+07	3.2332e+07	4.37338e+07	3.77657e+07	2.5555e+07	1.63157e+07	2.47938e+07	4.35127e+07	1	3.02901e+07	1	3.79438e+07	1	2.22215e+07	1	1.43653	0.320153	1.70753	0.0237885
Bo3g055670.1		pep chromosome:v2.1:C3:22038108:22039163:-1 gene:Bo3g055670 transcript:Bo3g055670.1 gene_biotype:protein_coding transcript_biotype:protein_coding	67.8161	18	437	6	1	261	29.4	4.78	High	High	High	High	High	High	High	High	High	High	High	High	6.667	1073.81	18	2.31078e+08	2.26588e+08	2.27097e+08	2.80648e+08	2.75252e+08	2.86378e+08	2.89264e+08	3.0084e+08	2.93645e+08	3.24616e+08	3.1706e+08	3.06644e+08	2.28254e+08	1	2.8076e+08	1	2.94583e+08	1	3.16107e+08	1	0.812988	0.000116588	0.931909	0.0256402
Bo1g022370.1	Elongation factor Tu	pep chromosome:v2.1:C1:8334519:8337512:1 gene:Bo1g022370 transcript:Bo1g022370.1 gene_biotype:protein_coding transcript_biotype:protein_coding description:Elongation factor Tu :UniProtKB/TrEMBL;Acc:A0A0D3A4L7]	23.7171	14	320	13	1	721	79.4	6.09	High	High	High	High	High	High	High	High	High	High	High	High	1.448	1071.72	14	3.00728e+08	3.1379e+08	3.1042e+08	2.99355e+08	3.16308e+08	3.15661e+08	4.43737e+08	4.36929e+08	4.88553e+08	5.3875e+08	5.15367e+08	5.02899e+08	3.08313e+08	1	3.10441e+08	1	4.56406e+08	1	5.19005e+08	1	0.993144	0.769554	0.879387	0.0315897
Bo6g039700.1		pep chromosome:v2.1:C6:9770271:9772951:-1 gene:Bo6g039700 transcript:Bo6g039700.1 gene_biotype:protein_coding transcript_biotype:protein_coding	39.924	14	353	14	1	526	60.2	7.18	High	High	High	High	High	High	High	High	High	High	High	High	3.281	1069.62	14	5.13193e+08	5.35509e+08	5.64605e+08	5.13418e+08	5.21378e+08	5.47346e+08	2.93171e+08	3.39725e+08	3.19979e+08	4.2223e+08	4.17977e+08	4.23142e+08	5.37769e+08	1	5.2738e+08	1	3.17625e+08	1	4.21117e+08	1	1.0197	0.59612	0.754245	0.00159352
Bo01155s020.1		pep scaffold:v2.1:Scaffold01155:12341:13440:1 gene:Bo01155s020 transcript:Bo01155s020.1 gene_biotype:protein_coding transcript_biotype:protein_coding	59.0038	17	437	3	1	261	29.4	4.78	High	High	High	High	High	High	High	High	High	High	High	High	6.667	1067.8	17	1.25534e+08	1.17831e+08	8.38013e+07	5.84641e+07	1.34689e+08	1.28137e+08	1.28859e+08	1.3789e+08	1.42035e+08	1.563e+08	1.47384e+08	1.39206e+08	1.09056e+08	1	1.07097e+08	1	1.36261e+08	1	1.4763e+08	1	1.01829	0.946742	0.922992	0.144715
Bo3g010850.1		pep chromosome:v2.1:C3:3866688:3869970:-1 gene:Bo3g010850 transcript:Bo3g010850.1 gene_biotype:protein_coding transcript_biotype:protein_coding	47.8505	22	409	2	1	535	58.9	6.02	Not Found	High	High	High	High	High	High	High	High	High	High	High	3.642	1067.57	22	NA	4.19856e+07	2.29777e+08	2.22628e+08	2.62e+08	2.3359e+08	2.09461e+08	2.30088e+08	245672080	2.19014e+08	2.49242e+08	2.57618e+08	1.35881e+08	0.666667	2.39406e+08	1	2.28407e+08	1	2.41958e+08	1	0.567577	0.244015	0.943994	0.437558
Bo9g163560.1		pep chromosome:v2.1:C9:48146967:48154054:1 gene:Bo9g163560 transcript:Bo9g163560.1 gene_biotype:protein_coding transcript_biotype:protein_coding	42.9612	22	414	2	1	824	90.4	7.68	Not Found	High	High	High	High	High	High	High	High	High	High	High	1.61	1066.15	22	NA	1.04222e+08	9.86387e+07	9.58507e+07	1.00871e+08	5.90781e+07	6.72142e+07	7.24266e+07	1.14174e+08	1.04375e+08	7.03095e+07	6.99405e+07	1.01431e+08	0.666667	8.52665e+07	1	8.4605e+07	1	8.15416e+07	1	1.18957	0.415095	1.03757	0.878078
Bo3g018730.1	40S ribosomal protein S4	pep chromosome:v2.1:C3:6312102:6313358:-1 gene:Bo3g018730 transcript:Bo3g018730.1 gene_biotype:protein_coding transcript_biotype:protein_coding description:40S ribosomal protein S4 :UniProtKB/TrEMBL;Acc:A0A0D3B2U3]	66.0305	17	458	3	1	262	29.8	10.2	High	High	High	High	High	High	High	High	High	High	High	High	10.007	1060.41	17	3.04562e+08	3.25777e+08	3.09399e+08	2.89408e+08	3.08219e+08	3.43519e+08	2.44417e+08	2.54632e+08	2.45223e+08	2.14715e+08	1.84795e+08	2.09231e+08	3.13246e+08	1	3.13715e+08	1	2.48091e+08	1	2.02914e+08	1	0.998504	0.979429	1.22264	0.00982842
Bo2g012690.1		pep chromosome:v2.1:C2:3749273:3751065:1 gene:Bo2g012690 transcript:Bo2g012690.1 gene_biotype:protein_coding transcript_biotype:protein_coding	64.7383	20	450	6	1	363	41	6.33	High	High	High	High	High	High	High	High	High	High	High	High	9.89	1057.95	20	3.85423e+08	4.94931e+08	4.69405e+08	4.02633e+08	4.60435e+08	4.68015e+08	7.25771e+07	3.90512e+08	2.68171e+08	3.4578e+08	2.86979e+08	3.21018e+08	4.4992e+08	1	4.43695e+08	1	2.43753e+08	1	3.17925e+08	1	1.01403	0.880902	0.7667	0.474845
Bo7g113140.1		pep chromosome:v2.1:C7:44645491:44650210:-1 gene:Bo7g113140 transcript:Bo7g113140.1 gene_biotype:protein_coding transcript_biotype:protein_coding	41.9753	30	394	7	1	891	97.7	5.16	High	High	High	High	High	High	High	High	High	High	High	High	2.954	1057.39	30	1.04826e+08	6.5615e+07	7.75533e+07	7.80772e+07	8.23448e+07	1.2049e+08	1.21668e+08	1.18075e+08	128178979	9.25438e+07	9.01895e+07	6.21304e+07	8.26647e+07	1	9.36373e+07	1	1.22641e+08	1	8.16212e+07	1	0.882817	0.570724	1.50256	0.01588
Bo7g093670.1	Mitochondrial Rho GTPase	pep chromosome:v2.1:C7:36163253:36167349:1 gene:Bo7g093670 transcript:Bo7g093670.1 gene_biotype:protein_coding transcript_biotype:protein_coding description:Mitochondrial Rho GTPase :UniProtKB/TrEMBL;Acc:A0A0D3DCG5]	42.8351	23	348	9	1	649	71.7	5.38	High	High	High	High	High	High	High	High	High	High	High	High	4.549	1050.75	23	7.56036e+07	8.27563e+07	1.00171e+08	1.12029e+08	1.21634e+08	1.25752e+08	1.05169e+08	1.14041e+08	9.29955e+07	1.13461e+08	1.15273e+08	1.13306e+08	8.61768e+07	1	1.19805e+08	1	1.04068e+08	1	1.14013e+08	1	0.719308	0.0157782	0.912774	0.180202
Bo2g141730.1	Eukaryotic translation initiation factor 3 subunit I	pep chromosome:v2.1:C2:45487709:45492158:-1 gene:Bo2g141730 transcript:Bo2g141730.1 gene_biotype:protein_coding transcript_biotype:protein_coding description:Eukaryotic translation initiation factor 3 subunit I :UniProtKB/TrEMBL;Acc:A0A0D3AW77]	35.969	18	344	9	1	645	72.1	7.05	High	High	High	High	High	High	High	High	High	High	High	High	1.97	1049.22	18	2.61369e+08	2.56487e+08	2.16167e+08	2.41043e+08	2.28189e+08	2.82706e+08	3.30124e+08	2.83439e+08	2.72997e+08	2.76312e+08	2.63788e+08	2.64679e+08	2.44674e+08	1	2.50646e+08	1	2.9552e+08	1	2.6826e+08	1	0.976174	0.797824	1.10162	0.204883
Bo01156s030.1	Ribosomal protein L11 family protein	pep scaffold:v2.1:Scaffold01156:15888:16388:-1 gene:Bo01156s030 transcript:Bo01156s030.1 gene_biotype:protein_coding transcript_biotype:protein_coding description:Ribosomal protein L11 family protein :TAIR;Acc:AT3G53430](projected from arabidopsis_thaliana,AT3G53430)	62.0482	8	364	1	1	166	18	8.97	Not Found	Not Found	Not Found	Not Found	High	High	Not Found	Not Found	Not Found	Not Found	Not Found	Not Found	4.623	1047.27	8	NA	NA	NA	NA	1.94e+07	1.97822e+07	NA	NA	NA	NA	NA	NA	NA	0	1.95911e+07	0.666667	NA	0	NA	0	NA	NA	NA	NA
Bo6g040080.1		pep chromosome:v2.1:C6:10148231:10151285:1 gene:Bo6g040080 transcript:Bo6g040080.1 gene_biotype:protein_coding transcript_biotype:protein_coding	50.3968	23	422	6	1	504	54.4	6.32	High	High	High	High	High	High	High	High	High	High	High	High	9	1043.71	23	1.05676e+08	9.88862e+07	1.11816e+08	1.33004e+08	1.31102e+08	1.23804e+08	1.04806e+08	1.44708e+08	1.38515e+08	1.16279e+08	1.3538e+08	1.59869e+08	1.05459e+08	1	1.29303e+08	1	1.29343e+08	1	1.37176e+08	1	0.815597	0.00695132	0.942896	0.680761
Bo5g049020.1		pep chromosome:v2.1:C5:16319436:16321646:1 gene:Bo5g049020 transcript:Bo5g049020.1 gene_biotype:protein_coding transcript_biotype:protein_coding	36.272	14	345	2	1	397	42.9	8.34	High	High	High	High	High	High	High	High	High	High	High	High	3.532	1041.9	14	8.66603e+07	8.04755e+07	8.38828e+07	8.06446e+07	1.12999e+08	7.39799e+07	8.25891e+07	8.21789e+07	8.35169e+07	8.97597e+07	8.74988e+07	9.30538e+07	8.36729e+07	1	8.92079e+07	1	8.27617e+07	1	9.01041e+07	1	0.937954	0.673139	0.918512	0.0114983
Bo1g070930.1		pep chromosome:v2.1:C1:20808228:20814187:-1 gene:Bo1g070930 transcript:Bo1g070930.1 gene_biotype:protein_coding transcript_biotype:protein_coding	17.6656	23	361	3	1	1585	178	7.74	High	High	High	High	High	High	High	High	High	High	High	High	0.803	1040.38	23	4.70114e+07	4.342e+07	4.76426e+07	4.16848e+07	3.82534e+07	4.48467e+07	2.4972e+07	4.50989e+07	2.23795e+07	5.66845e+07	2.99711e+07	3.09376e+07	4.60247e+07	1	4.15949e+07	1	3.08168e+07	1	3.91977e+07	1	1.1065	0.128088	0.786188	0.500081
Bo7g111270.1		pep chromosome:v2.1:C7:44219150:44224446:-1 gene:Bo7g111270 transcript:Bo7g111270.1 gene_biotype:protein_coding transcript_biotype:protein_coding	17.0492	16	423	16	1	610	69.3	7.88	High	High	High	High	High	High	High	High	High	High	High	High	1.947	1034.87	16	3.15639e+09	3.03402e+09	2.95272e+09	2.89018e+09	2.93602e+09	2.79532e+09	2.81585e+09	2.72515e+09	2726932899	3.09371e+09	2.97487e+09	2.96026e+09	3.04771e+09	1	2.87384e+09	1	2.75598e+09	1	3.00961e+09	1	1.0605	0.0738338	0.915724	0.00805953
Bo1g116200.1	actin 8	pep chromosome:v2.1:C1:35041459:35042835:-1 gene:Bo1g116200 transcript:Bo1g116200.1 gene_biotype:protein_coding transcript_biotype:protein_coding description:actin 8 :Projected from Arabidopsis thaliana (AT1G49240) TAIR;Acc:AT1G49240]	51.7241	16	419	6	1	377	41.9	5.58	High	High	High	High	High	High	High	High	High	High	High	High	9	1034.55	16	1.96455e+08	1.48717e+08	1.99374e+08	2.47685e+08	2.20633e+08	2.27166e+08	1.75208e+08	1.45395e+08	1.77275e+08	2.44553e+08	2.39042e+08	2.26541e+08	1.81515e+08	1	2.31828e+08	1	1.6596e+08	1	2.36712e+08	1	0.782974	0.0516646	0.701103	0.00365107
Bo00969s010.1		pep scaffold:v2.1:Scaffold00969:12159:16193:-1 gene:Bo00969s010 transcript:Bo00969s010.1 gene_biotype:protein_coding transcript_biotype:protein_coding	38.8571	15	321	9	1	525	59	8.46	High	High	High	High	High	High	High	High	High	High	High	High	2.899	1031.48	15	5.32848e+08	5.24929e+08	5.36139e+08	5.8898e+08	5.7967e+08	5.52851e+08	5.18915e+08	5.2957e+08	5.38501e+08	6.23201e+08	5.70465e+08	6.42172e+08	5.31305e+08	1	5.73834e+08	1	5.28995e+08	1	6.11946e+08	1	0.925886	0.0198816	0.864448	0.0201403
Bo2g133940.1		pep chromosome:v2.1:C2:41787684:41788980:-1 gene:Bo2g133940 transcript:Bo2g133940.1 gene_biotype:protein_coding transcript_biotype:protein_coding	61.9835	22	474	9	1	242	27.9	9.98	High	High	High	High	High	High	High	High	High	High	High	High	13.454	1030.44	22	8.33221e+08	9.56693e+08	9.2528e+08	7.29773e+08	8.00607e+08	7.11414e+08	7.27799e+08	7.82469e+08	7.86844e+08	5.8094e+08	5.93457e+08	6.23791e+08	9.05064e+08	1	7.47265e+08	1	7.65704e+08	1	5.99396e+08	1	1.21117	0.0264476	1.27746	0.00189701
Bo01155s010.1	TCP-1/cpn60 chaperonin family protein	pep scaffold:v2.1:Scaffold01155:8083:11316:1 gene:Bo01155s010 transcript:Bo01155s010.1 gene_biotype:protein_coding transcript_biotype:protein_coding description:TCP-1/cpn60 chaperonin family protein :TAIR;Acc:AT3G02530](projected from arabidopsis_thaliana,AT3G02530)	47.8505	22	390	4	1	535	58.8	6.21	High	High	High	High	High	High	High	High	High	High	High	Not Found	3.41	1030.18	22	2.85037e+07	4.53408e+07	2.49684e+07	2.99911e+07	6.73037e+07	6.82629e+07	6.76711e+07	6.19459e+07	6.98963e+07	7.40303e+07	6.81584e+07	NA	3.29376e+07	1	5.51859e+07	1	6.65044e+07	1	7.10943e+07	0.666667	0.596849	0.189251	0.935439	0.309348
Bo8g092740.1	Ketol-acid reductoisomerase	pep chromosome:v2.1:C8:31686577:31689285:1 gene:Bo8g092740 transcript:Bo8g092740.1 gene_biotype:protein_coding transcript_biotype:protein_coding description:Ketol-acid reductoisomerase :UniProtKB/TrEMBL;Acc:A0A0D3DU71]	32.0138	16	357	5	1	581	62.9	6.8	High	High	High	High	High	High	High	High	High	High	High	High	2.57	1029.64	16	1.36691e+08	1.4581e+08	1.45558e+08	1.48622e+08	1.54919e+08	1.63421e+08	1.37589e+08	1.37098e+08	1.46536e+08	1.17132e+08	1.17839e+08	1.20102e+08	1.42686e+08	1	1.55654e+08	1	1.40408e+08	1	1.18358e+08	1	0.916687	0.0683322	1.1863	0.00231328
Bo6g120010.1	PAM domain (PCI/PINT associated module) protein	pep chromosome:v2.1:C6:37761073:37763361:-1 gene:Bo6g120010 transcript:Bo6g120010.1 gene_biotype:protein_coding transcript_biotype:protein_coding description:PAM domain (PCI/PINT associated module) protein :TAIR;Acc:AT1G75990](projected from arabidopsis_thaliana,AT1G75990)	52.3422	25	378	25	1	491	55.9	8.25	High	High	High	High	High	High	High	High	High	High	High	High	4.337	1029.41	25	3.00828e+08	3.29786e+08	2.8469e+08	3.10423e+08	2.81854e+08	2.92583e+08	2.80364e+08	2.6214e+08	2.7872e+08	2.42491e+08	2.43367e+08	2.15212e+08	3.05101e+08	1	2.94953e+08	1	2.73741e+08	1	2.3369e+08	1	1.0344	0.550918	1.17139	0.0214473
Bo2g095350.1	Glyceraldehyde-3-phosphate dehydrogenase	pep chromosome:v2.1:C2:26730280:26732946:-1 gene:Bo2g095350 transcript:Bo2g095350.1 gene_biotype:protein_coding transcript_biotype:protein_coding description:Glyceraldehyde-3-phosphate dehydrogenase :UniProtKB/TrEMBL;Acc:A0A0D3ARQ8]	52.506	18	348	5	1	419	44.5	8.69	High	High	High	High	High	High	High	High	High	High	High	High	3.453	1028.09	18	4.43886e+06	2.1983e+07	3.19276e+07	4.9296e+07	4.86598e+07	4.9719e+07	5.69952e+07	6.99077e+07	8.04053e+07	5.44205e+07	5.34916e+07	6.16089e+07	1.94498e+07	1	4.92249e+07	1	6.91027e+07	1	5.6507e+07	1	0.395121	0.020788	1.22291	0.156865
Bo8g023120.1	Serine hydroxymethyltransferase	pep chromosome:v2.1:C8:5795093:5796981:-1 gene:Bo8g023120 transcript:Bo8g023120.1 gene_biotype:protein_coding transcript_biotype:protein_coding description:Serine hydroxymethyltransferase :UniProtKB/TrEMBL;Acc:A0A0D3DKC0]	61.7834	21	342	2	1	471	51.7	7.47	High	High	High	High	High	High	High	High	High	High	High	High	5.391	1027.04	21	6.49558e+07	6.10924e+07	4.52156e+07	5.32751e+07	7.84609e+07	7.11105e+07	7.06007e+07	7.35159e+07	8.02382e+07	5.14272e+07	4.53864e+07	4.81355e+07	5.70879e+07	1	6.76155e+07	1	7.47849e+07	1	4.83163e+07	1	0.844303	0.334941	1.54782	0.00138081
Bo5g132650.1		pep chromosome:v2.1:C5:41237504:41243134:-1 gene:Bo5g132650 transcript:Bo5g132650.1 gene_biotype:protein_coding transcript_biotype:protein_coding	36.3976	39	372	26	1	1338	145.4	6.25	High	High	High	High	High	High	High	High	High	High	High	High	2.162	1025.87	39	8.88451e+07	8.39816e+07	7.60828e+07	1.07905e+08	1.12611e+08	9.73982e+07	1.1904e+08	1.12948e+08	1.25273e+08	1.24733e+08	1.28349e+08	1.11605e+08	8.29698e+07	1	1.05971e+08	1	1.19087e+08	1	1.21562e+08	1	0.782947	0.0169331	0.979637	0.710446
Bo4g121630.1		pep chromosome:v2.1:C4:31556470:31557865:-1 gene:Bo4g121630 transcript:Bo4g121630.1 gene_biotype:protein_coding transcript_biotype:protein_coding	47.4801	15	408	2	1	377	41.7	5.59	High	High	High	High	High	High	High	High	High	High	High	High	9	1023.81	15	1.1526e+08	1.22761e+08	6.73052e+07	1.20538e+08	1.25545e+08	1.38459e+08	7.84703e+07	1.36128e+08	9.07313e+07	1.34664e+08	8.05558e+07	8.17991e+07	1.01776e+08	1	1.2818e+08	1	1.01777e+08	1	9.90061e+07	1	0.794002	0.219876	1.02798	0.917134
Bo8g061450.1		pep chromosome:v2.1:C8:20098371:20101960:-1 gene:Bo8g061450 transcript:Bo8g061450.1 gene_biotype:protein_coding transcript_biotype:protein_coding	34.5361	15	419	7	1	582	62.5	5.83	High	High	High	High	High	High	High	High	High	High	High	High	2.932	1022.51	15	6.07072e+08	6.05324e+08	5.56571e+08	5.91308e+08	5.67148e+08	5.45179e+08	7.77197e+08	6.53015e+08	631667634	8.65483e+08	8.50358e+08	8.151e+08	5.89656e+08	1	5.67879e+08	1	6.87293e+08	1	8.43647e+08	1	1.03835	0.363291	0.814669	0.03069
Bo7g059890.1	Protein disulfide-isomerase	pep chromosome:v2.1:C7:22029108:22031568:1 gene:Bo7g059890 transcript:Bo7g059890.1 gene_biotype:protein_coding transcript_biotype:protein_coding description:Protein disulfide-isomerase :UniProtKB/TrEMBL;Acc:A0A0D3D7M0]	55.3571	27	390	18	1	504	56	5.1	High	High	High	High	High	High	High	High	High	High	High	High	4.78	1022.19	27	1.03053e+08	1.04928e+08	1.04912e+08	1.16597e+08	1.18431e+08	1.14728e+08	1.12962e+08	1.23561e+08	1.23861e+08	1.28751e+08	1.28243e+08	1.27778e+08	1.04298e+08	1	1.16585e+08	1	1.20128e+08	1	1.28257e+08	1	0.894606	0.000576543	0.936614	0.0865522
Bo4g143790.1		pep chromosome:v2.1:C4:39066029:39069622:-1 gene:Bo4g143790 transcript:Bo4g143790.1 gene_biotype:protein_coding transcript_biotype:protein_coding	61.6393	36	399	30	1	610	68.2	8.16	High	High	High	High	High	High	High	High	High	High	High	High	4.915	1020.72	36	1.41406e+08	1.50102e+08	1.54154e+08	1.62065e+08	1.59416e+08	1.59834e+08	1.87667e+08	1.87553e+08	1.80505e+08	1.9272e+08	1.99811e+08	2.05587e+08	1.48554e+08	1	1.60438e+08	1	1.85242e+08	1	1.99372e+08	1	0.925926	0.0366644	0.929125	0.0327833
Bo5g039030.1		pep chromosome:v2.1:C5:12482347:12484363:-1 gene:Bo5g039030 transcript:Bo5g039030.1 gene_biotype:protein_coding transcript_biotype:protein_coding	57.0225	17	349	17	1	356	39.8	5.08	High	High	High	High	High	High	High	High	High	High	High	High	9	1016.32	17	2.82303e+08	2.94004e+08	3.04344e+08	3.45168e+08	3.64849e+08	3.46461e+08	3.40115e+08	3.7765e+08	3.7102e+08	3.88701e+08	3.79204e+08	4.01473e+08	2.9355e+08	1	3.52159e+08	1	3.62928e+08	1	3.89793e+08	1	0.833572	0.00286559	0.93108	0.112407
Bo2g028570.1	40S ribosomal protein S4	pep chromosome:v2.1:C2:8522038:8523239:-1 gene:Bo2g028570 transcript:Bo2g028570.1 gene_biotype:protein_coding transcript_biotype:protein_coding description:40S ribosomal protein S4 :UniProtKB/TrEMBL;Acc:A0A0D3AL83]	70.6564	19	475	4	1	259	29.4	10.17	High	High	High	High	High	High	High	High	High	High	High	High	13.678	1014.75	19	1.55509e+08	1.4773e+08	1.44291e+08	1.30415e+08	1.29972e+08	1.53304e+08	1.08282e+08	1.08079e+08	103429921	1.03112e+08	8.63563e+07	7.18645e+07	1.49177e+08	1	1.37897e+08	1	1.06597e+08	1	8.71108e+07	1	1.0818	0.249929	1.22369	0.100676
Bo01075s040.1		pep scaffold:v2.1:Scaffold01075:14611:16845:1 gene:Bo01075s040 transcript:Bo01075s040.1 gene_biotype:protein_coding transcript_biotype:protein_coding	50.096	26	468	1	1	521	58.5	8.6	Not Found	High	High	High	Not Found	Not Found	High	Not Found	Not Found	High	High	High	6.197	1014.48	26	NA	5.19382e+07	5.78968e+07	5.77466e+07	NA	NA	2.31997e+07	NA	NA	4.89281e+07	7.08334e+07	4.60065e+07	5.49175e+07	0.666667	5.77466e+07	0.333333	2.31997e+07	0.333333	5.5256e+07	1	0.951008	NA	0.419859	NA
Bo8g100010.1		pep chromosome:v2.1:C8:34589356:34591707:1 gene:Bo8g100010 transcript:Bo8g100010.1 gene_biotype:protein_coding transcript_biotype:protein_coding	53.7572	19	341	8	1	519	54.2	5.68	High	High	High	High	High	High	High	High	High	High	High	High	3.85	1009.93	19	1.37632e+08	3.14036e+08	3.32399e+08	3.14898e+08	2.92166e+08	3.29853e+08	3.18996e+08	1.30761e+08	3.56656e+08	2.36042e+08	3.13308e+08	1.16663e+08	2.61356e+08	1	3.12306e+08	1	2.68804e+08	1	2.22004e+08	1	0.836859	0.464343	1.21081	0.631611
Bo9g134960.1		pep chromosome:v2.1:C9:41337065:41339102:1 gene:Bo9g134960 transcript:Bo9g134960.1 gene_biotype:protein_coding transcript_biotype:protein_coding	52.9703	20	450	1	1	404	45.4	5.5	Not Found	Not Found	High	High	Not Found	Not Found	Not Found	Not Found	Not Found	High	Not Found	High	8.345	1009.41	20	NA	NA	7.84581e+06	1.62056e+07	NA	NA	NA	NA	NA	1.15812e+07	NA	NA	7.84581e+06	0.333333	1.62056e+07	0.333333	NA	0	1.15812e+07	0.333333	0.484141	NA	NA	NA
Bo6g033150.1	Dihydrolipoamide acetyltransferase, long form protein	pep chromosome:v2.1:C6:8312504:8316207:-1 gene:Bo6g033150 transcript:Bo6g033150.1 gene_biotype:protein_coding transcript_biotype:protein_coding description:Dihydrolipoamide acetyltransferase, long form protein :TAIR;Acc:AT1G54220](projected from arabidopsis_thaliana,AT1G54220)	39.8148	19	348	11	1	540	58.4	7.17	High	High	High	High	High	High	High	High	High	High	High	High	2.594	1007.78	19	3.99146e+08	4.00805e+08	3.97599e+08	4.87884e+08	4.87786e+08	4.75729e+08	4.86559e+08	4.46268e+08	4.91766e+08	5.08644e+08	5.39198e+08	5.08416e+08	3.99183e+08	1	4.838e+08	1	4.74864e+08	1	5.18753e+08	1	0.8251	3.38537e-05	0.915396	0.0676375
Bo3g062170.1		pep chromosome:v2.1:C3:23862316:23867460:1 gene:Bo3g062170 transcript:Bo3g062170.1 gene_biotype:protein_coding transcript_biotype:protein_coding	21.25	13	334	2	1	720	80.2	6.23	High	High	High	High	High	High	High	High	High	High	High	High	1.33	1005.21	13	1.56847e+08	2.68732e+08	1.35104e+08	2.49886e+08	2.4106e+08	2.14986e+08	2.83755e+08	2.76603e+08	279443791	2.93009e+08	2.92257e+08	2.84825e+08	1.86894e+08	1	2.35311e+08	1	2.79934e+08	1	2.9003e+08	1	0.794243	0.320218	0.965188	0.0389919
Bo8g019180.1		pep chromosome:v2.1:C8:4312107:4313936:1 gene:Bo8g019180 transcript:Bo8g019180.1 gene_biotype:protein_coding transcript_biotype:protein_coding	70.2899	16	335	5	1	276	29.9	6.54	High	High	High	High	High	High	High	High	High	High	High	High	11.328	1004.83	16	2.59659e+08	2.73599e+08	2.66265e+08	2.7617e+08	2.80206e+08	2.87997e+08	3.05538e+08	2.94394e+08	3.07639e+08	3.41723e+08	3.67358e+08	3.47543e+08	2.66507e+08	1	2.81458e+08	1	3.02524e+08	1	3.52208e+08	1	0.946882	0.0481955	0.858935	0.004807
Bo4g175980.1		pep chromosome:v2.1:C4:46552359:46561871:1 gene:Bo4g175980 transcript:Bo4g175980.1 gene_biotype:protein_coding transcript_biotype:protein_coding	24.4137	50	407	2	1	2388	278.5	8.72	High	High	High	High	High	High	High	High	High	High	High	High	1.076	1004.38	50	1.40509e+07	2.59947e+07	4.22909e+07	1.79176e+07	2.0181e+07	3.98462e+07	4.06744e+07	4.74574e+07	3.76346e+07	4.39773e+07	1.5211e+07	4.32598e+07	2.74455e+07	1	2.59816e+07	1	4.19222e+07	1	3.41494e+07	1	1.05634	0.898223	1.22761	0.47654
Bo5g004340.1		pep chromosome:v2.1:C5:1159158:1161501:1 gene:Bo5g004340 transcript:Bo5g004340.1 gene_biotype:protein_coding transcript_biotype:protein_coding	44.7312	19	370	1	1	465	50.6	8.85	High	High	High	Not Found	High	Not Found	Not Found	Not Found	Not Found	High	High	High	5.661	1002.79	19	2.60507e+07	2.83155e+07	2.28113e+07	NA	3.58721e+07	NA	NA	NA	NA	2.81193e+07	2.78145e+07	3.17091e+07	2.57258e+07	1	3.58721e+07	0.333333	NA	0	2.92143e+07	1	0.717154	NA	NA	NA
Bo4g182150.1		pep chromosome:v2.1:C4:47991793:47994641:-1 gene:Bo4g182150 transcript:Bo4g182150.1 gene_biotype:protein_coding transcript_biotype:protein_coding	36.783	26	357	23	1	802	92.1	8.21	High	High	High	High	High	High	High	High	High	High	High	High	2.162	999.5	26	1.7119e+08	1.88801e+08	1.37254e+08	1.75164e+08	1.5993e+08	1.68651e+08	1.82399e+08	1.80124e+08	1.78321e+08	1.64482e+08	1.67344e+08	1.66475e+08	1.65748e+08	1	1.67915e+08	1	1.80281e+08	1	1.66101e+08	1	0.987099	0.8973	1.08537	0.000616656
Bo5g062600.1	Glutathione S-transferase, C-terminal-like;Translation elongation factor EF1B/ribosomal protein S6	pep chromosome:v2.1:C5:19608526:19609657:1 gene:Bo5g062600 transcript:Bo5g062600.1 gene_biotype:protein_coding transcript_biotype:protein_coding description:Glutathione S-transferase, C-terminal-like;Translation elongation factor EF1B/ribosomal protein S6 :Projected from Arabidopsis thaliana (AT1G30230) TAIR;Acc:AT1G30230]	42.1739	9	367	1	1	230	25.1	4.54	High	High	High	High	High	High	High	High	High	High	High	High	12.335	998.21	9	1.05442e+08	NA	2.9728e+08	2.26568e+08	3.39253e+08	1.16257e+08	2.47152e+08	2.96537e+08	3.24027e+08	3.22824e+08	8.31737e+07	1.44036e+08	2.01361e+08	0.666667	2.27359e+08	1	2.89239e+08	1	1.83345e+08	1	0.885653	0.827814	1.57757	0.232638
Bo8g050110.1		pep chromosome:v2.1:C8:16433840:16436973:1 gene:Bo8g050110 transcript:Bo8g050110.1 gene_biotype:protein_coding transcript_biotype:protein_coding	35.6091	28	394	9	1	747	80.2	5.4	High	High	High	High	High	High	High	High	High	High	High	High	2.415	993.08	28	3.10682e+08	3.30132e+08	3.35491e+08	4.69523e+08	4.72928e+08	4.72852e+08	3.10184e+08	3.90657e+08	3.97396e+08	3.4446e+08	3.42875e+08	3.31226e+08	3.25435e+08	1	4.71768e+08	1	3.66079e+08	1	3.39521e+08	1	0.68982	4.33321e-05	1.07822	0.401506
Bo4g122890.1	Pyruvate kinase	pep chromosome:v2.1:C4:31778898:31782230:-1 gene:Bo4g122890 transcript:Bo4g122890.1 gene_biotype:protein_coding transcript_biotype:protein_coding description:Pyruvate kinase :UniProtKB/TrEMBL;Acc:A0A0D3BYD1]	57.3055	28	390	3	1	527	57.4	6.9	High	High	Not Found	High	High	High	High	High	High	High	High	High	5.989	991.21	28	9.37472e+07	9.55836e+07	NA	2.66425e+07	5.52131e+07	1.1767e+08	7.26826e+07	5.79242e+07	7.13954e+07	5.60956e+07	8.18547e+07	7.32851e+07	9.46654e+07	0.666667	6.65086e+07	1	6.73341e+07	1	7.04118e+07	1	1.42336	0.47658	0.956289	0.747544
Bo2g048180.1		pep chromosome:v2.1:C2:13656890:13659303:1 gene:Bo2g048180 transcript:Bo2g048180.1 gene_biotype:protein_coding transcript_biotype:protein_coding	38.2246	17	331	10	1	552	60.6	6.96	High	High	High	High	High	High	High	High	High	High	High	High	3.739	990.81	17	6.68837e+08	6.03631e+08	6.18564e+08	8.82626e+08	9.15325e+08	8.65925e+08	5.60802e+08	5.64324e+08	5.64263e+08	8.34664e+08	8.0004e+08	8.32442e+08	6.30344e+08	1	8.87958e+08	1	5.6313e+08	1	8.22382e+08	1	0.70988	0.000461431	0.684755	2.10085e-05
Bo8g108560.1		pep chromosome:v2.1:C8:38751462:38754202:1 gene:Bo8g108560 transcript:Bo8g108560.1 gene_biotype:protein_coding transcript_biotype:protein_coding	40.3162	15	418	8	1	506	54.3	5.44	High	High	High	High	High	High	High	High	High	High	High	High	3.329	987.3	15	4.98611e+08	5.21133e+08	5.1517e+08	5.41024e+08	5.50757e+08	5.53934e+08	6.23056e+08	6.7938e+08	6.01544e+08	6.8097e+08	6.89365e+08	7.06401e+08	5.11638e+08	1	5.48571e+08	1	6.3466e+08	1	6.92245e+08	1	0.932674	0.00897552	0.916814	0.0775136
Bo8g099580.1	Eukaryotic translation initiation factor 3 subunit B	pep chromosome:v2.1:C8:34356065:34359083:1 gene:Bo8g099580 transcript:Bo8g099580.1 gene_biotype:protein_coding transcript_biotype:protein_coding description:Eukaryotic translation initiation factor 3 subunit B :UniProtKB/TrEMBL;Acc:A0A0D3DVK7]	35.7143	23	367	4	1	714	82.1	5.39	High	High	High	High	High	High	High	High	High	High	High	High	3.424	986.56	23	1.81024e+08	1.74057e+08	1.71035e+08	1.39411e+08	1.33213e+08	1.59187e+08	1.8577e+08	1.8209e+08	1.83056e+08	2.00549e+08	1.96477e+08	2.00186e+08	1.75372e+08	1	1.43937e+08	1	1.83639e+08	1	1.9907e+08	1	1.21839	0.0198649	0.922481	0.000825068
Bo9g028630.1		pep chromosome:v2.1:C9:9633484:9635675:1 gene:Bo9g028630 transcript:Bo9g028630.1 gene_biotype:protein_coding transcript_biotype:protein_coding	52.9412	26	378	9	1	561	63	5.69	High	High	High	High	High	High	High	High	High	High	High	High	4.429	985.66	26	1.12147e+08	1.10715e+08	1.12821e+08	2.43003e+08	2.51254e+08	2.49376e+08	1.78658e+08	1.84646e+08	1.78199e+08	9.53556e+07	9.4305e+07	1.00614e+08	1.11894e+08	1	2.47878e+08	1	1.80501e+08	1	9.67582e+07	1	0.451409	7.6717e-07	1.86548	7.98456e-06
Bo9g008210.1		pep chromosome:v2.1:C9:1908113:1909972:1 gene:Bo9g008210 transcript:Bo9g008210.1 gene_biotype:protein_coding transcript_biotype:protein_coding	60.7914	12	346	2	1	278	30.3	7.58	High	High	High	High	High	High	High	High	High	High	High	High	8.006	984.55	12	5.69426e+07	1.28006e+08	1.17276e+08	1.37905e+08	1.23562e+08	1.07403e+08	7.68753e+07	9.36141e+07	94590415	1.43895e+08	1.75977e+08	1.31245e+08	1.00742e+08	1	1.22957e+08	1	8.83599e+07	1	1.50373e+08	1	0.819324	0.403583	0.587607	0.0128844
Bo8g081240.1		pep chromosome:v2.1:C8:27587850:27593344:1 gene:Bo8g081240 transcript:Bo8g081240.1 gene_biotype:protein_coding transcript_biotype:protein_coding	19.469	16	378	5	1	791	86.1	7.15	High	High	High	High	High	High	High	High	High	High	High	High	1.798	982.93	16	1.89886e+08	1.75553e+08	2.49079e+08	2.86759e+08	2.8164e+08	2.69814e+08	2.78344e+08	2.74579e+08	2.307e+08	2.52121e+08	2.38654e+08	1.74965e+08	2.04839e+08	1	2.79404e+08	1	2.61208e+08	1	2.21913e+08	1	0.733129	0.0318523	1.17707	0.237097
Bo2g163990.1		pep chromosome:v2.1:C2:51188221:51191814:-1 gene:Bo2g163990 transcript:Bo2g163990.1 gene_biotype:protein_coding transcript_biotype:protein_coding	41.2121	24	385	9	1	660	71.3	9.39	High	High	High	High	High	High	High	High	High	High	High	High	3.642	981.8	24	1.50149e+08	1.59642e+08	1.686e+08	1.28339e+08	1.34971e+08	1.28678e+08	1.95336e+08	2.10348e+08	2.06805e+08	1.85312e+08	2.06064e+08	2.03442e+08	1.59464e+08	1	1.30663e+08	1	2.04163e+08	1	1.98273e+08	1	1.22042	0.00742934	1.02971	0.499511
Bo5g029180.1	GDSL-like Lipase/Acylhydrolase superfamily protein	pep chromosome:v2.1:C5:10122399:10124465:1 gene:Bo5g029180 transcript:Bo5g029180.1 gene_biotype:protein_coding transcript_biotype:protein_coding description:GDSL-like Lipase/Acylhydrolase superfamily protein :TAIR;Acc:AT1G20130](projected from arabidopsis_thaliana,AT1G20130)	36.1162	15	337	14	1	551	60.5	9.85	High	High	High	High	High	High	High	High	High	High	High	High	7.318	981.29	15	1.18492e+09	1.23552e+09	1.24192e+09	4.11882e+08	4.05307e+08	4.35965e+08	6.04998e+08	6.0272e+08	6.41289e+08	6.86907e+08	6.39222e+08	6.67423e+08	1.22079e+09	1	4.17718e+08	1	6.16336e+08	1	6.64517e+08	1	2.92251	2.43654e-06	0.927494	0.0610731
Bo9g029370.1	Succinate--CoA ligase [ADP-forming] subunit beta, mitochondrial	pep chromosome:v2.1:C9:10326351:10328684:-1 gene:Bo9g029370 transcript:Bo9g029370.1 gene_biotype:protein_coding transcript_biotype:protein_coding description:Succinate--CoA ligase [ADP-forming] subunit beta, mitochondrial :UniProtKB/TrEMBL;Acc:A0A0D3E3Z1]	64.8456	27	376	6	1	421	45.2	7.71	High	High	High	High	High	High	High	High	High	High	High	High	5.105	980.91	27	1.55938e+08	1.54577e+08	1.54493e+08	2.87515e+08	2.96418e+08	3.07769e+08	2.45298e+08	2.31577e+08	2.50733e+08	1.89003e+08	1.84072e+08	1.91172e+08	1.55003e+08	1	2.97234e+08	1	2.42536e+08	1	1.88082e+08	1	0.521484	1.73269e-05	1.28952	0.000856754
Bo1g022050.1		pep chromosome:v2.1:C1:8050660:8060094:-1 gene:Bo1g022050 transcript:Bo1g022050.1 gene_biotype:protein_coding transcript_biotype:protein_coding	24.5339	50	396	2	1	2360	275.3	8.75	High	High	High	High	High	Not Found	High	High	High	Not Found	High	High	1.05	980.42	50	1.00944e+07	1.13044e+07	5.17244e+07	2.52299e+07	2.5135e+07	NA	3.24919e+07	3.01023e+07	2.70221e+07	NA	1.94655e+07	2.57302e+07	2.43744e+07	1	2.51824e+07	0.666667	2.98721e+07	1	2.25978e+07	0.666667	0.967913	0.966382	1.3219	0.10083
Bo9g036880.1		pep chromosome:v2.1:C9:12411854:12414648:-1 gene:Bo9g036880 transcript:Bo9g036880.1 gene_biotype:protein_coding transcript_biotype:protein_coding	56.5724	32	403	15	1	601	68.1	7.01	High	High	High	High	High	High	High	High	High	High	High	High	4.859	979.7	32	1.66041e+08	2.24549e+08	2.1814e+08	4.55162e+08	4.43986e+08	4.18742e+08	3.58734e+08	3.58645e+08	3.4971e+08	2.05044e+08	1.98981e+08	1.92832e+08	2.0291e+08	1	4.39297e+08	1	3.55696e+08	1	1.98952e+08	1	0.461897	0.000384045	1.78785	4.52069e-06
Bo4g156110.1	Eukaryotic translation initiation factor 3 subunit B	pep chromosome:v2.1:C4:42767542:42770611:-1 gene:Bo4g156110 transcript:Bo4g156110.1 gene_biotype:protein_coding transcript_biotype:protein_coding description:Eukaryotic translation initiation factor 3 subunit B :UniProtKB/TrEMBL;Acc:A0A0D3C1X4]	42.0168	24	363	5	1	714	82.1	5.31	High	High	High	High	High	High	High	High	High	High	High	High	3.241	979.07	24	8.69649e+07	1.12765e+08	7.31932e+07	6.58724e+07	9.02331e+07	9.82625e+07	7.94244e+07	7.18007e+07	8.86586e+07	9.10026e+07	8.63722e+07	6.51584e+07	9.09743e+07	1	8.47893e+07	1	7.99612e+07	1	8.08444e+07	1	1.07294	0.703894	0.989076	0.929139
Bo5g111240.1		pep chromosome:v2.1:C5:34342127:34345619:1 gene:Bo5g111240 transcript:Bo5g111240.1 gene_biotype:protein_coding transcript_biotype:protein_coding	56.1468	27	424	7	1	545	59.1	6.3	High	High	High	High	High	High	High	High	High	High	High	High	3.292	977.47	27	1.61829e+08	1.57993e+08	1.52552e+08	1.55372e+08	1.75437e+08	1.46933e+08	1.20902e+08	1.20582e+08	1.27755e+08	1.63131e+08	1.67807e+08	1.76045e+08	1.57458e+08	1	1.59247e+08	1	1.2308e+08	1	1.68995e+08	1	0.988766	0.850025	0.728305	0.000494023
Bo9g152510.1		pep chromosome:v2.1:C9:45552744:45554540:1 gene:Bo9g152510 transcript:Bo9g152510.1 gene_biotype:protein_coding transcript_biotype:protein_coding	48.5795	14	367	14	1	352	37.9	9.29	High	High	High	High	High	High	High	High	High	High	High	High	3.394	977.04	14	8.29713e+08	7.7478e+08	7.70648e+08	8.70548e+08	8.62442e+08	8.87807e+08	9.04176e+08	8.98943e+08	8.63025e+08	8.42953e+08	8.11078e+08	7.90059e+08	7.91714e+08	1	8.73599e+08	1	8.88714e+08	1	8.14697e+08	1	0.906267	0.0160834	1.09085	0.0211307
Bo9g014860.1		pep chromosome:v2.1:C9:4621854:4624999:-1 gene:Bo9g014860 transcript:Bo9g014860.1 gene_biotype:protein_coding transcript_biotype:protein_coding	39.3893	25	390	10	1	655	71.4	9.39	High	High	High	High	High	High	High	High	High	High	High	High	3.715	973.6	25	2.00472e+08	1.6126e+08	1.5617e+08	1.30251e+08	1.355e+08	1.37564e+08	2.0329e+08	2.09167e+08	2.0141e+08	1.70816e+08	1.81562e+08	1.85011e+08	1.72634e+08	1	1.34438e+08	1	2.04622e+08	1	1.7913e+08	1	1.28411	0.0542867	1.14231	0.0063687
Bo9g025760.1	ATTPS11 description	pep chromosome:v2.1:C9:8054320:8057074:-1 gene:Bo9g025760 transcript:Bo9g025760.1 gene_biotype:protein_coding transcript_biotype:protein_coding gene_symbol:ATTPS11 description:trehalose phosphatase/synthase 11 :TAIR;Acc:AT2G18700](projected from arabidopsis_thaliana,AT2G18700)	51.0417	33	346	28	1	864	97.7	6.62	High	High	High	High	High	High	High	High	High	High	High	High	3.314	972.42	33	1.54702e+08	1.46582e+08	1.4736e+08	1.73714e+08	1.69825e+08	1.80357e+08	1.52679e+08	1.57687e+08	1.54278e+08	1.57664e+08	1.56554e+08	1.4347e+08	1.49548e+08	1	1.74632e+08	1	1.54881e+08	1	1.52563e+08	1	0.85636	0.00335615	1.0152	0.653683
Bo7g075920.1		pep chromosome:v2.1:C7:28645411:28647197:1 gene:Bo7g075920 transcript:Bo7g075920.1 gene_biotype:protein_coding transcript_biotype:protein_coding	50.6394	24	417	18	1	391	44.6	10.17	High	High	High	High	High	High	High	High	High	High	High	High	5.952	971.21	24	4.46476e+08	4.34554e+08	4.45455e+08	5.26072e+08	5.21652e+08	5.23336e+08	4.79003e+08	4.68171e+08	4.55193e+08	4.19841e+08	4.23831e+08	4.12747e+08	4.42162e+08	1	5.23687e+08	1	4.67456e+08	1	4.18806e+08	1	0.844324	3.51336e-05	1.11616	0.00307019
Bo2g155310.1	seryl-tRNA synthetase / serine--tRNA ligase	pep chromosome:v2.1:C2:48411433:48413420:1 gene:Bo2g155310 transcript:Bo2g155310.1 gene_biotype:protein_coding transcript_biotype:protein_coding description:seryl-tRNA synthetase / serine--tRNA ligase :TAIR;Acc:AT5G27470](projected from arabidopsis_thaliana,AT5G27470)	57.6497	23	346	16	1	451	51.3	7.06	High	High	High	High	High	High	High	High	High	High	High	High	4.012	964.53	23	3.58917e+08	3.54832e+08	3.56558e+08	3.34137e+08	3.39805e+08	3.49001e+08	3.43517e+08	3.54883e+08	338399023	2.24639e+08	2.09823e+08	2.1562e+08	3.56769e+08	1	3.40981e+08	1	3.456e+08	1	2.16694e+08	1	1.0463	0.0245283	1.59487	3.82504e-05
Bo8g092690.1		pep chromosome:v2.1:C8:31654845:31657432:1 gene:Bo8g092690 transcript:Bo8g092690.1 gene_biotype:protein_coding transcript_biotype:protein_coding	42.6471	24	371	5	1	612	65.6	7.11	High	High	High	High	High	High	High	High	High	High	High	High	4.766	964.17	24	5.04648e+07	5.0298e+07	4.89423e+07	4.86083e+07	6.36081e+07	5.37803e+07	6.08435e+07	6.26697e+07	4.72344e+07	1.85201e+07	4.3739e+07	5.78335e+07	4.99017e+07	1	5.53322e+07	1	5.69159e+07	1	4.00309e+07	1	0.901856	0.287059	1.4218	0.247729
Bo8g091700.1		pep chromosome:v2.1:C8:31071236:31073467:-1 gene:Bo8g091700 transcript:Bo8g091700.1 gene_biotype:protein_coding transcript_biotype:protein_coding	57.4113	23	494	7	1	479	56.1	6.13	High	High	High	High	High	High	High	High	High	High	High	High	3.725	963.76	23	1.38895e+08	1.49242e+08	1.42476e+08	1.53971e+08	1.54083e+08	1.59356e+08	1.78577e+08	1.70892e+08	1.69884e+08	1.4425e+08	1.48228e+08	1.55107e+08	1.43538e+08	1	1.55803e+08	1	1.73118e+08	1	1.49195e+08	1	0.921276	0.0251488	1.16034	0.00467194
Bo7g058180.1		pep chromosome:v2.1:C7:21430638:21434678:1 gene:Bo7g058180 transcript:Bo7g058180.1 gene_biotype:protein_coding transcript_biotype:protein_coding	19.4969	14	338	2	1	795	89.1	5.58	High	High	High	High	High	High	High	High	High	High	High	High	1.009	958.97	14	6.98647e+07	3.34068e+07	4.04426e+07	1.00915e+08	5.31629e+07	1.10007e+08	7.12522e+07	4.30226e+07	8.57793e+07	1.09849e+08	5.29145e+07	9.73739e+07	4.79047e+07	1	8.80282e+07	1	6.66847e+07	1	8.67123e+07	1	0.544197	0.126872	0.769034	0.401454
Bo9g092550.1	Eukaryotic translation initiation factor 3 subunit A	pep chromosome:v2.1:C9:28460966:28464902:-1 gene:Bo9g092550 transcript:Bo9g092550.1 gene_biotype:protein_coding transcript_biotype:protein_coding description:Eukaryotic translation initiation factor 3 subunit A :UniProtKB/TrEMBL;Acc:A0A0D3E9A4]	42.0455	37	394	6	1	968	112.4	9.11	High	High	High	High	High	High	High	High	High	High	High	High	2.246	958.91	37	1.2045e+08	6.19656e+07	8.04238e+07	5.89674e+07	8.75475e+07	5.39395e+07	1.0841e+08	1.00809e+08	102204353	1.06867e+08	6.63966e+07	7.51841e+07	8.76131e+07	1	6.68181e+07	1	1.03808e+08	1	8.28159e+07	1	1.31122	0.361152	1.25348	0.168654
Bo5g004570.1	Malate dehydrogenase	pep chromosome:v2.1:C5:1316166:1317980:-1 gene:Bo5g004570 transcript:Bo5g004570.1 gene_biotype:protein_coding transcript_biotype:protein_coding description:Malate dehydrogenase :UniProtKB/TrEMBL;Acc:A0A0D3C7I8]	63.5542	17	318	5	1	332	35.7	6.55	High	High	High	High	High	High	High	High	High	High	High	High	9.926	957.17	17	1.77525e+08	1.43499e+08	2.26439e+08	2.58492e+08	2.21493e+08	2.41839e+08	1.98093e+08	1.86242e+08	1.7572e+08	2.46377e+08	2.53964e+08	2.15765e+08	1.82488e+08	1	2.40608e+08	1	1.86685e+08	1	2.38702e+08	1	0.758444	0.0919922	0.782084	0.0175727
Bo1g016890.1		pep chromosome:v2.1:C1:5658771:5660828:-1 gene:Bo1g016890 transcript:Bo1g016890.1 gene_biotype:protein_coding transcript_biotype:protein_coding	56.8849	23	408	1	1	443	49.4	6.1	High	High	High	High	High	High	High	High	High	High	High	High	5.391	953.53	23	3.08939e+08	3.3032e+08	2.56596e+08	2.704e+08	1.31485e+08	2.30319e+08	2.29921e+08	2.22366e+08	223207393	2.6898e+08	3.13891e+08	2.99171e+08	2.98618e+08	1	2.10735e+08	1	2.25164e+08	1	2.94014e+08	1	1.41704	0.133169	0.76583	0.00686071
Bo3g064500.1	Lysine--tRNA ligase	pep chromosome:v2.1:C3:24690697:24693979:-1 gene:Bo3g064500 transcript:Bo3g064500.1 gene_biotype:protein_coding transcript_biotype:protein_coding description:Lysine--tRNA ligase :UniProtKB/TrEMBL;Acc:A0A0D3BAT8]	36.6509	25	399	3	1	633	71.7	6.01	High	High	High	High	High	High	High	High	High	High	High	High	3.575	952.94	25	4.97391e+07	3.32309e+07	4.72153e+07	5.69424e+07	4.80606e+07	3.52806e+07	3.68666e+07	5.07305e+07	3.64375e+07	3.53064e+07	3.32153e+07	4.73688e+07	4.33951e+07	1	4.67612e+07	1	4.13449e+07	1	3.86302e+07	1	0.928015	0.699635	1.07027	0.695097
Bo8g058870.1	Phosphoglycerate mutase, 2,3-bisphosphoglycerate-independent	pep chromosome:v2.1:C8:19056766:19059399:-1 gene:Bo8g058870 transcript:Bo8g058870.1 gene_biotype:protein_coding transcript_biotype:protein_coding description:Phosphoglycerate mutase, 2,3-bisphosphoglycerate-independent :TAIR;Acc:AT1G09780](projected from arabidopsis_thaliana,AT1G09780)	50.2693	22	301	16	1	557	60.6	5.68	High	High	High	High	High	High	High	High	High	High	High	High	6.017	952.25	22	1.64815e+08	1.67072e+08	1.75e+08	1.49971e+08	1.50159e+08	1.43201e+08	1.05614e+08	8.56157e+07	1.03641e+08	1.22422e+08	1.13484e+08	1.19711e+08	1.68962e+08	1	1.47777e+08	1	9.82904e+07	1	1.18539e+08	1	1.14336	0.00528925	0.829183	0.0424593
Bo6g033170.1		pep chromosome:v2.1:C6:8326877:8328558:1 gene:Bo6g033170 transcript:Bo6g033170.1 gene_biotype:protein_coding transcript_biotype:protein_coding	33.9806	14	339	1	1	412	46.6	5.57	Not Found	Not Found	Not Found	Not Found	Not Found	High	Not Found	Not Found	Not Found	Not Found	Not Found	Not Found	3.642	950.38	14	NA	NA	NA	NA	NA	2.31522e+07	NA	NA	NA	NA	NA	NA	NA	0	2.31522e+07	0.333333	NA	0	NA	0	NA	NA	NA	NA
Bo4g137240.1		pep chromosome:v2.1:C4:36170555:36171618:1 gene:Bo4g137240 transcript:Bo4g137240.1 gene_biotype:protein_coding transcript_biotype:protein_coding	56.4202	17	356	2	1	257	28.8	4.79	High	High	High	High	High	High	High	High	High	High	High	High	9	948.39	17	1.98471e+07	4.31338e+07	4.16389e+07	6.50919e+07	3.1227e+07	4.51846e+07	1.58502e+08	8.18439e+07	7.9794e+07	6.99164e+07	6.92949e+07	7.21495e+07	3.48733e+07	1	4.71678e+07	1	1.06713e+08	1	7.04536e+07	1	0.739344	0.376763	1.51466	0.234338
Bo8g059280.1		pep chromosome:v2.1:C8:19305422:19311729:1 gene:Bo8g059280 transcript:Bo8g059280.1 gene_biotype:protein_coding transcript_biotype:protein_coding	47.2527	38	351	11	1	910	99	9.01	High	High	High	High	High	High	High	High	High	High	High	High	2.712	948.37	38	3.06267e+07	4.99911e+07	6.33953e+07	5.32277e+07	4.46568e+07	6.36824e+07	8.14168e+07	6.70523e+07	67965477	8.15865e+07	7.32027e+07	7.41033e+07	4.80044e+07	1	5.38556e+07	1	7.21449e+07	1	7.62975e+07	1	0.891352	0.622568	0.945573	0.480971
Bo3g002260.1	Isocitrate dehydrogenase [NAD] subunit, mitochondrial	pep chromosome:v2.1:C3:576398:578039:1 gene:Bo3g002260 transcript:Bo3g002260.1 gene_biotype:protein_coding transcript_biotype:protein_coding description:Isocitrate dehydrogenase [NAD] subunit, mitochondrial :UniProtKB/TrEMBL;Acc:A0A0D3AZJ1]	44.9198	13	290	1	1	374	40.7	7.23	Not Found	Not Found	Not Found	Not Found	Not Found	Not Found	Not Found	Not Found	Not Found	High	High	High	4.38	947.07	13	NA	NA	NA	NA	NA	NA	NA	NA	NA	4.85619e+07	4.4323e+07	4.30992e+07	NA	0	NA	0	NA	0	4.5328e+07	1	NA	NA	NA	NA
Bo7g116290.1		pep chromosome:v2.1:C7:46401701:46406524:1 gene:Bo7g116290 transcript:Bo7g116290.1 gene_biotype:protein_coding transcript_biotype:protein_coding	31.592	29	459	7	1	804	88.9	6.62	High	High	High	High	High	High	High	High	High	High	High	High	2.511	946.68	29	4.04006e+07	3.48474e+07	4.49258e+07	5.35055e+07	5.24403e+07	5.22528e+07	6.78958e+07	7.64016e+07	7.23972e+07	6.13256e+07	7.48201e+07	6.1863e+07	4.00579e+07	1	5.27329e+07	1	7.22315e+07	1	6.60029e+07	1	0.759639	0.0125405	1.09437	0.284897
Bo6g081710.1		pep chromosome:v2.1:C6:25420610:25421921:-1 gene:Bo6g081710 transcript:Bo6g081710.1 gene_biotype:protein_coding transcript_biotype:protein_coding	64.2308	18	378	5	1	260	29.2	4.75	High	High	High	High	High	High	High	High	High	High	High	High	6.667	945.5	18	1.28705e+08	1.28263e+08	1.3661e+08	1.88148e+08	1.82614e+08	1.90763e+08	1.48562e+08	1.57824e+08	1.54849e+08	1.99459e+08	1.82535e+08	1.84141e+08	1.31193e+08	1	1.87175e+08	1	1.53745e+08	1	1.88712e+08	1	0.70091	0.000102321	0.814706	0.00443839
Bo5g088280.1		pep chromosome:v2.1:C5:29126124:29128220:-1 gene:Bo5g088280 transcript:Bo5g088280.1 gene_biotype:protein_coding transcript_biotype:protein_coding	30.0493	12	304	1	1	406	43.5	8.34	High	Not Found	Not Found	Not Found	Not Found	Not Found	Not Found	Not Found	Not Found	High	High	High	3.101	941.97	12	2.01298e+07	NA	NA	NA	NA	NA	NA	NA	NA	2.34229e+07	2.87309e+07	2.45068e+07	2.01298e+07	0.333333	NA	0	NA	0	2.55535e+07	1	NA	NA	NA	NA
Bo7g084390.1		pep chromosome:v2.1:C7:33148072:33149207:1 gene:Bo7g084390 transcript:Bo7g084390.1 gene_biotype:protein_coding transcript_biotype:protein_coding	46.7626	10	340	1	1	278	30.3	7.64	High	High	High	High	High	High	High	High	High	High	High	High	4.926	935.82	10	2.32915e+08	2.68818e+08	2.72125e+08	3.29566e+08	2.79125e+08	2.8998e+08	2.95213e+08	2.96847e+08	2.89314e+08	2.83289e+08	2.66676e+08	2.95918e+08	2.57953e+08	1	2.99557e+08	1	2.93791e+08	1	2.81961e+08	1	0.861114	0.103681	1.04196	0.248727
Bo3g016840.1	RuvB-like helicase	pep chromosome:v2.1:C3:5412126:5414625:-1 gene:Bo3g016840 transcript:Bo3g016840.1 gene_biotype:protein_coding transcript_biotype:protein_coding description:RuvB-like helicase :UniProtKB/TrEMBL;Acc:A0A0D3B2A4]	36.4629	15	306	15	1	458	50.1	5.69	High	High	High	High	High	High	High	High	High	High	High	High	3.748	935.37	15	3.7355e+08	3.6513e+08	3.5915e+08	3.73575e+08	3.79891e+08	3.80934e+08	4.11961e+08	3.93828e+08	4.27724e+08	4.242e+08	4.33759e+08	4.25171e+08	3.65943e+08	1	3.78133e+08	1	4.11171e+08	1	4.2771e+08	1	0.967764	0.0628575	0.961331	0.182018
Bo1g151540.1		pep chromosome:v2.1:C1:42353988:42361529:-1 gene:Bo1g151540 transcript:Bo1g151540.1 gene_biotype:protein_coding transcript_biotype:protein_coding	32.1978	26	352	2	1	910	102.1	5.33	High	High	High	High	High	High	High	High	High	High	High	High	2.063	934.81	26	1.6772e+08	1.66452e+08	1.28649e+08	7.86211e+07	9.75505e+07	7.25297e+08	7.88793e+08	4.1344e+08	2.21476e+08	1.25407e+08	1.86326e+08	1.73034e+08	1.54274e+08	1	3.0049e+08	1	4.7457e+08	1	1.61589e+08	1	0.513409	0.529893	2.93689	0.13527
Bo2g095370.1	Phosphoglycerate kinase	pep chromosome:v2.1:C2:26737568:26739390:-1 gene:Bo2g095370 transcript:Bo2g095370.1 gene_biotype:protein_coding transcript_biotype:protein_coding description:Phosphoglycerate kinase :UniProtKB/TrEMBL;Acc:A0A0D3ARR0]	56.8579	18	343	5	1	401	42.1	5.53	High	High	High	High	High	High	High	High	High	High	High	High	4.436	934.63	18	1.16643e+08	1.91857e+08	2.09354e+08	1.95651e+08	1.95874e+08	1.94502e+08	1.52211e+08	1.63501e+08	2.47421e+08	1.68695e+08	1.56523e+08	1.8004e+08	1.72618e+08	1	1.95342e+08	1	1.87711e+08	1	1.68419e+08	1	0.883667	0.469063	1.11454	0.564938
Bo9g183040.1	Isocitrate dehydrogenase [NAD] subunit, mitochondrial	pep chromosome:v2.1:C9:53969090:53970746:-1 gene:Bo9g183040 transcript:Bo9g183040.1 gene_biotype:protein_coding transcript_biotype:protein_coding description:Isocitrate dehydrogenase [NAD] subunit, mitochondrial :UniProtKB/TrEMBL;Acc:A0A0D3EI63]	46.0274	14	299	3	1	365	39.8	7.23	High	High	High	High	High	High	High	High	High	High	High	High	4.505	934.47	14	1.80667e+08	1.4092e+08	1.60466e+08	1.67528e+08	1.56315e+08	2.04166e+08	1.31121e+08	1.35185e+08	2.06074e+08	1.60775e+08	1.97094e+08	1.98659e+08	1.60685e+08	1	1.76003e+08	1	1.5746e+08	1	1.8551e+08	1	0.912964	0.453079	0.848799	0.362298
Bo3g055800.1		pep chromosome:v2.1:C3:22080188:22082996:-1 gene:Bo3g055800 transcript:Bo3g055800.1 gene_biotype:protein_coding transcript_biotype:protein_coding	43.2273	37	407	25	1	849	92.8	6.4	High	High	High	High	High	High	High	High	High	High	High	High	2.162	931.35	37	1.58301e+08	1.67324e+08	1.76576e+08	2.03723e+08	2.11222e+08	1.95276e+08	1.93289e+08	2.04326e+08	2.00409e+08	1.71732e+08	1.64852e+08	1.6125e+08	1.674e+08	1	2.03407e+08	1	1.99342e+08	1	1.65945e+08	1	0.822982	0.00678504	1.20125	0.00170054
Bo3g009180.1		pep chromosome:v2.1:C3:3084387:3085630:-1 gene:Bo3g009180 transcript:Bo3g009180.1 gene_biotype:protein_coding transcript_biotype:protein_coding	63.0252	16	373	1	1	238	26.4	9.04	High	High	Not Found	Not Found	Not Found	High	Not Found	High	Not Found	Not Found	High	Not Found	7.254	925.4	16	3.20129e+08	3.30532e+08	NA	NA	NA	3.18865e+08	NA	2.90869e+08	NA	NA	2.77459e+08	NA	3.2533e+08	0.666667	3.18865e+08	0.333333	2.90869e+08	0.333333	2.77459e+08	0.333333	1.02028	NA	1.04833	NA
Bo5g037490.1		pep chromosome:v2.1:C5:11991362:11993238:-1 gene:Bo5g037490 transcript:Bo5g037490.1 gene_biotype:protein_coding transcript_biotype:protein_coding	54.007	15	319	3	1	287	32.6	5	High	High	High	High	High	High	High	High	High	High	High	High	4.505	925.34	15	2.37844e+07	4.4118e+07	2.8355e+07	4.3365e+07	4.10781e+07	4.89036e+07	2.99147e+07	2.9225e+07	2.97705e+07	3.05294e+07	3.32168e+07	3.51026e+07	3.20858e+07	1	4.44489e+07	1	2.96367e+07	1	3.29496e+07	1	0.721858	0.133569	0.899456	0.0692446
Bo3g183840.1	Malate dehydrogenase	pep chromosome:v2.1:C3:63477960:63479583:-1 gene:Bo3g183840 transcript:Bo3g183840.1 gene_biotype:protein_coding transcript_biotype:protein_coding description:Malate dehydrogenase :UniProtKB/TrEMBL;Acc:A0A0D3BMU9]	49.5979	15	283	1	1	373	39.6	9.09	Not Found	Not Found	Not Found	High	High	High	High	High	High	High	High	High	7.377	922.36	15	NA	NA	NA	1.18638e+08	1.35141e+08	1.08018e+08	1.15023e+08	1.0559e+08	107459164	9.29886e+07	9.42489e+07	8.19891e+07	NA	0	1.20599e+08	1	1.09357e+08	1	8.97422e+07	1	NA	NA	1.21857	0.015497
Bo8g058750.1		pep chromosome:v2.1:C8:19025288:19027176:1 gene:Bo8g058750 transcript:Bo8g058750.1 gene_biotype:protein_coding transcript_biotype:protein_coding	35.6796	14	325	8	1	412	46.5	5.69	High	High	High	High	High	High	High	High	High	High	High	High	3.437	919.78	14	1.30485e+08	1.29799e+08	1.41586e+08	1.58681e+08	1.60011e+08	1.57725e+08	1.62559e+08	1.54473e+08	1.508e+08	1.33656e+08	1.4664e+08	1.4762e+08	1.33957e+08	1	1.58806e+08	1	1.55944e+08	1	1.42639e+08	1	0.843526	0.00304387	1.09328	0.0793401
Bo4g021280.1		pep chromosome:v2.1:C4:2900713:2901783:-1 gene:Bo4g021280 transcript:Bo4g021280.1 gene_biotype:protein_coding transcript_biotype:protein_coding	60.3306	19	417	1	1	242	28	9.95	High	High	High	High	High	High	High	High	High	High	High	High	8.12	916.04	19	3.75047e+08	4.34725e+08	3.91061e+08	3.10961e+08	3.74892e+08	3.10816e+08	3.27893e+08	3.29751e+08	3.35481e+08	2.6318e+08	2.84945e+08	2.96877e+08	4.00278e+08	1	3.32223e+08	1	3.31042e+08	1	2.81667e+08	1	1.20485	0.0706391	1.17529	0.008183
Bo6g031300.1	Malate dehydrogenase	pep chromosome:v2.1:C6:7543392:7545009:-1 gene:Bo6g031300 transcript:Bo6g031300.1 gene_biotype:protein_coding transcript_biotype:protein_coding description:Malate dehydrogenase :UniProtKB/TrEMBL;Acc:A0A0D3CQN2]	53.9359	15	282	3	1	343	35.9	8.19	High	High	High	High	High	High	High	High	High	High	High	High	10.053	914.79	15	2.37828e+08	2.44716e+08	1.53569e+08	3.92764e+08	3.66715e+08	2.99897e+08	3.14612e+08	3.07983e+08	2.40219e+08	2.35562e+08	2.28294e+08	2.38652e+08	2.12038e+08	1	3.53125e+08	1	2.87605e+08	1	2.34169e+08	1	0.60046	0.0248594	1.22819	0.0896616
Bo3g064670.1		pep chromosome:v2.1:C3:24803962:24812212:-1 gene:Bo3g064670 transcript:Bo3g064670.1 gene_biotype:protein_coding transcript_biotype:protein_coding	44.1044	47	436	24	1	1111	129.6	5.71	High	High	High	High	High	High	High	High	High	High	High	High	3.853	911.38	47	1.28129e+08	1.30209e+08	9.58083e+07	1.33762e+08	1.0513e+08	1.27423e+08	1.32214e+08	1.39008e+08	1.40163e+08	1.27916e+08	1.29543e+08	1.37323e+08	1.18049e+08	1	1.22105e+08	1	1.37128e+08	1	1.31594e+08	1	0.966781	0.788189	1.04205	0.220778
Bo9g059040.1	Lactate/malate dehydrogenase family protein	pep chromosome:v2.1:C9:17392497:17394057:1 gene:Bo9g059040 transcript:Bo9g059040.1 gene_biotype:protein_coding transcript_biotype:protein_coding description:Lactate/malate dehydrogenase family protein :TAIR;Acc:AT5G43330](projected from arabidopsis_thaliana,AT5G43330)	62.0482	16	312	4	1	332	35.6	6.55	High	High	High	High	High	High	High	High	High	High	High	High	8.152	910.94	16	2.02599e+08	2.31338e+08	2.37449e+08	2.49497e+08	2.56721e+08	2.43464e+08	1.88683e+08	1.78453e+08	1.96302e+08	2.40527e+08	2.28899e+08	2.24291e+08	2.23795e+08	1	2.49894e+08	1	1.87813e+08	1	2.31239e+08	1	0.895561	0.0840494	0.812203	0.0035742
Bo7g094970.1		pep chromosome:v2.1:C7:36354684:36358791:-1 gene:Bo7g094970 transcript:Bo7g094970.1 gene_biotype:protein_coding transcript_biotype:protein_coding	45.5182	33	381	13	1	714	81.9	7.36	High	High	High	High	High	High	High	High	High	High	High	High	3.417	910.44	33	1.64876e+08	1.69518e+08	1.45354e+08	1.66805e+08	1.70312e+08	1.96476e+08	1.81194e+08	1.78948e+08	1.90192e+08	1.83769e+08	1.62074e+08	1.75199e+08	1.59916e+08	1	1.77864e+08	1	1.83445e+08	1	1.73681e+08	1	0.899089	0.20704	1.05622	0.245664
Bo3g181270.1		pep chromosome:v2.1:C3:62939069:62942290:1 gene:Bo3g181270 transcript:Bo3g181270.1 gene_biotype:protein_coding transcript_biotype:protein_coding	42.8287	21	376	5	1	502	54.1	6.27	High	High	High	High	High	High	High	High	High	High	High	High	5.884	910.31	21	1.71159e+08	9.00105e+07	1.57965e+08	1.71546e+08	1.29634e+08	1.24111e+08	1.29884e+08	1.5595e+08	175524936	1.66782e+08	1.6367e+08	1.68086e+08	1.39712e+08	1	1.41764e+08	1	1.53786e+08	1	1.66179e+08	1	0.985524	0.947458	0.925425	0.403687
Bo5g071170.1		pep chromosome:v2.1:C5:23174039:23175539:1 gene:Bo5g071170 transcript:Bo5g071170.1 gene_biotype:protein_coding transcript_biotype:protein_coding	65.2174	15	297	3	1	276	29.9	6.54	High	High	High	High	High	High	High	High	High	High	High	High	14.849	908.59	15	1.21041e+08	1.59432e+08	1.38546e+08	1.71615e+08	1.53536e+08	1.71866e+08	1.71975e+08	1.81617e+08	1.6913e+08	2.23129e+08	2.70467e+08	1.99504e+08	1.39673e+08	1	1.65672e+08	1	1.74241e+08	1	2.31033e+08	1	0.843069	0.108994	0.75418	0.0553091
Bo4g163740.1	Ribosomal protein	pep chromosome:v2.1:C4:44019651:44020756:-1 gene:Bo4g163740 transcript:Bo4g163740.1 gene_biotype:protein_coding transcript_biotype:protein_coding description:Ribosomal protein :UniProtKB/TrEMBL;Acc:A0A0D3C2E3]	50.463	11	360	3	1	216	24.4	9.86	High	High	High	High	High	High	High	High	High	High	High	High	5.449	908.58	11	2.43699e+08	5.43359e+08	7.18277e+08	5.02135e+08	4.55064e+08	5.28057e+08	4.16833e+08	5.14457e+08	3.97322e+08	4.47201e+08	4.49393e+08	3.34119e+08	5.01778e+08	1	4.95085e+08	1	4.42871e+08	1	4.10237e+08	1	1.01352	0.964214	1.07955	0.568259
Bo9g068140.1	Nucleoside diphosphate kinase	pep chromosome:v2.1:C9:20369780:20370508:1 gene:Bo9g068140 transcript:Bo9g068140.1 gene_biotype:protein_coding transcript_biotype:protein_coding description:Nucleoside diphosphate kinase :UniProtKB/TrEMBL;Acc:A0A0D3E746]	55.4054	8	294	2	1	148	16.4	6.79	High	High	High	High	High	High	High	High	High	High	High	High	38.811	906.48	8	3.2222e+08	3.31244e+08	3.32236e+08	3.16913e+08	3.83426e+08	3.93152e+08	2.12199e+08	2.28602e+08	2.09715e+08	2.82887e+08	2.65285e+08	2.35999e+08	3.28567e+08	1	3.64497e+08	1	2.16838e+08	1	2.6139e+08	1	0.901425	0.211295	0.829558	0.0403618
Bo3g083960.1	ROF1 description	pep chromosome:v2.1:C3:31295091:31297920:1 gene:Bo3g083960 transcript:Bo3g083960.1 gene_biotype:protein_coding transcript_biotype:protein_coding gene_symbol:ROF1 description:rotamase FKBP 1 :Projected from Arabidopsis thaliana (AT3G25230) TAIR;Acc:AT3G25230]	45.0909	25	404	23	1	550	61.1	5.27	High	High	High	High	High	High	High	High	High	High	High	High	4.065	906.27	25	5.52604e+08	4.99251e+08	5.47662e+08	7.7844e+08	8.3642e+08	8.21657e+08	6.68393e+08	6.63259e+08	6.93957e+08	5.23757e+08	5.18358e+08	5.14724e+08	5.33172e+08	1	8.12172e+08	1	6.75203e+08	1	5.18946e+08	1	0.656477	0.00033047	1.3011	9.22545e-05
Bo1g011540.1		pep chromosome:v2.1:C1:4111489:4113962:-1 gene:Bo1g011540 transcript:Bo1g011540.1 gene_biotype:protein_coding transcript_biotype:protein_coding	50.4554	26	384	13	1	549	61.6	6.38	High	High	High	High	High	High	High	High	High	High	High	High	3.642	905.53	26	2.03506e+08	1.90785e+08	1.86075e+08	2.42297e+08	2.48066e+08	2.38519e+08	2.14868e+08	2.14794e+08	2.2704e+08	2.00894e+08	1.94992e+08	1.93016e+08	1.93455e+08	1	2.42961e+08	1	2.18901e+08	1	1.96301e+08	1	0.796241	0.00110362	1.11513	0.00864595
Bo1g059000.1		pep chromosome:v2.1:C1:18000521:18002651:1 gene:Bo1g059000 transcript:Bo1g059000.1 gene_biotype:protein_coding transcript_biotype:protein_coding	41.4758	19	382	10	1	393	43.2	6.7	High	High	High	High	High	High	High	High	High	High	High	High	6.356	905.4	19	2.45545e+08	2.35139e+08	2.33503e+08	3.30067e+08	3.07829e+08	3.03736e+08	3.61092e+08	5.28864e+08	5.00782e+08	3.96063e+08	3.83079e+08	2.39504e+08	2.38062e+08	1	3.13877e+08	1	4.6358e+08	1	3.39548e+08	1	0.758456	0.00109104	1.36528	0.160795
Bo4g198680.1	FUMARASE 2	pep chromosome:v2.1:C4:53574977:53578549:1 gene:Bo4g198680 transcript:Bo4g198680.1 gene_biotype:protein_coding transcript_biotype:protein_coding description:FUMARASE 2 :Projected from Arabidopsis thaliana (AT5G50950) TAIR;Acc:AT5G50950]	39.2927	15	289	6	1	509	55.2	8.66	High	High	High	High	High	High	High	High	High	High	High	High	1.985	905	15	2.84931e+08	3.07002e+08	4.01151e+08	4.30237e+08	4.34966e+08	4.42834e+08	2.81384e+08	4.16032e+08	4.06585e+08	3.01442e+08	3.07123e+08	4.12621e+08	3.31028e+08	1	4.36012e+08	1	3.68e+08	1	3.40395e+08	1	0.759218	0.0427923	1.0811	0.650593
Bo9g176160.1	ATUBA2 description	pep chromosome:v2.1:C9:52371330:52375166:-1 gene:Bo9g176160 transcript:Bo9g176160.1 gene_biotype:protein_coding transcript_biotype:protein_coding gene_symbol:ATUBA2 description:ubiquitin activating enzyme 2 :TAIR;Acc:AT5G06460](projected from arabidopsis_thaliana,AT5G06460)	36.2117	33	363	23	1	1077	119.4	5.3	High	High	High	High	High	High	High	High	High	High	High	High	2.408	904.81	33	1.91208e+08	3.65117e+08	1.72649e+08	4.75357e+08	4.17785e+08	5.41524e+08	3.78092e+08	1.31252e+08	1.36765e+08	1.54855e+08	1.46565e+08	1.52861e+08	2.42992e+08	1	4.78222e+08	1	2.1537e+08	1	1.51427e+08	1	0.508115	0.0295173	1.42227	0.476131
Bo7g073980.1		pep chromosome:v2.1:C7:27797428:27802211:1 gene:Bo7g073980 transcript:Bo7g073980.1 gene_biotype:protein_coding transcript_biotype:protein_coding	37.5348	41	412	11	1	1079	122.5	6.8	High	High	High	High	High	High	High	High	High	High	High	High	1.924	903.81	41	7.62882e+07	7.27298e+07	8.50017e+07	8.57149e+07	8.52352e+07	9.74046e+07	8.5658e+07	8.46886e+07	9.25712e+07	8.5224e+07	8.68338e+07	8.34523e+07	7.80066e+07	1	8.94516e+07	1	8.76392e+07	1	8.517e+07	1	0.872054	0.101239	1.02899	0.40693
Bo8g054710.1		pep chromosome:v2.1:C8:18259984:18262345:1 gene:Bo8g054710 transcript:Bo8g054710.1 gene_biotype:protein_coding transcript_biotype:protein_coding	56.6292	23	372	1	1	445	49.5	6.1	Not Found	Not Found	Not Found	High	High	High	Not Found	Not Found	Not Found	Not Found	Not Found	High	5.391	902.06	23	NA	NA	NA	1.13834e+08	1.06681e+08	1.11156e+08	NA	NA	NA	NA	NA	9.96527e+07	NA	0	1.10557e+08	1	NA	0	9.96527e+07	0.333333	NA	NA	NA	NA
Bo8g002940.1	Malate dehydrogenase	pep chromosome:v2.1:C8:603291:605060:-1 gene:Bo8g002940 transcript:Bo8g002940.1 gene_biotype:protein_coding transcript_biotype:protein_coding description:Malate dehydrogenase :UniProtKB/TrEMBL;Acc:A0A0D3DIT7]	51.8072	15	308	3	1	332	35.8	6.79	High	High	High	High	High	High	High	High	High	High	High	High	8.152	900.25	15	1.40311e+08	2.073e+08	1.99176e+08	1.33413e+08	1.31477e+08	1.34256e+08	1.17248e+08	1.2427e+08	1.24539e+08	1.43319e+08	1.4836e+08	1.50065e+08	1.82262e+08	1	1.33049e+08	1	1.22019e+08	1	1.47248e+08	1	1.36989	0.0802568	0.828663	0.00128697
Bo4g074360.1	Ribosomal protein	pep chromosome:v2.1:C4:16018392:16019398:1 gene:Bo4g074360 transcript:Bo4g074360.1 gene_biotype:protein_coding transcript_biotype:protein_coding description:Ribosomal protein :UniProtKB/TrEMBL;Acc:A0A0D3BUE3]	47.2222	10	358	1	1	216	24.4	9.83	High	High	High	High	High	High	High	High	High	High	High	High	4.179	900.03	10	3.02222e+08	3.01342e+08	2.74458e+08	2.23445e+08	2.61079e+08	2.68726e+08	1.90651e+08	2.5231e+08	279244097	2.99545e+08	2.74344e+08	2.82091e+08	2.92674e+08	1	2.51083e+08	1	2.40735e+08	1	2.85327e+08	1	1.16564	0.0674447	0.843717	0.177222
Bo3g185450.1	Nucleoside diphosphate kinase	pep chromosome:v2.1:C3:64753805:64754510:-1 gene:Bo3g185450 transcript:Bo3g185450.1 gene_biotype:protein_coding transcript_biotype:protein_coding description:Nucleoside diphosphate kinase :UniProtKB/TrEMBL;Acc:A0A0D3BNB0]	55.4054	8	295	2	1	148	16.4	6.79	High	High	High	High	High	High	High	High	High	High	High	High	27.48	899.76	8	6.0035e+08	6.08149e+08	6.2578e+08	5.61804e+08	5.24125e+08	5.38173e+08	3.50073e+08	3.67448e+08	3.61065e+08	4.56185e+08	4.25276e+08	4.11017e+08	6.11426e+08	1	5.41367e+08	1	3.59528e+08	1	4.30826e+08	1	1.12941	0.00625626	0.834509	0.00749895
Bo9g166760.1		pep chromosome:v2.1:C9:49483875:49485294:1 gene:Bo9g166760 transcript:Bo9g166760.1 gene_biotype:protein_coding transcript_biotype:protein_coding	56.5574	14	367	1	1	244	26.8	9.03	High	High	High	High	High	High	High	High	High	High	High	High	5.813	898.31	14	3.15711e+08	2.88781e+08	2.86666e+08	3.54078e+08	3.09164e+08	3.18171e+08	3.59002e+08	3.45e+08	3.31603e+08	3.16613e+08	2.97151e+08	3.03427e+08	2.97053e+08	1	3.27138e+08	1	3.45202e+08	1	3.05731e+08	1	0.908036	0.144182	1.1291	0.0156054
Bo4g142620.1		pep chromosome:v2.1:C4:38901586:38908117:1 gene:Bo4g142620 transcript:Bo4g142620.1 gene_biotype:protein_coding transcript_biotype:protein_coding	36.3404	39	412	30	1	1175	134	6.38	High	High	High	High	High	High	High	High	High	High	High	High	2.2	898.1	39	1.47493e+08	1.42201e+08	1.35409e+08	1.40931e+08	1.42565e+08	1.47563e+08	1.44926e+08	1.55852e+08	1.40267e+08	1.35507e+08	1.18622e+08	1.28153e+08	1.41701e+08	1	1.43686e+08	1	1.47015e+08	1	1.27427e+08	1	0.986183	0.647801	1.15372	0.0435585
Bo6g010760.1		pep chromosome:v2.1:C6:2262897:2264366:-1 gene:Bo6g010760 transcript:Bo6g010760.1 gene_biotype:protein_coding transcript_biotype:protein_coding	39.4822	15	381	15	1	309	33.8	8.19	High	High	High	High	High	High	High	High	High	High	High	High	23.041	896.04	15	1.25801e+09	1.39002e+09	1.28739e+09	1.24101e+09	1.24191e+09	1.20566e+09	5.1242e+08	5.01823e+08	5.51867e+08	5.84367e+08	5.98266e+08	6.1504e+08	1.31181e+09	1	1.22953e+09	1	5.22037e+08	1	5.99225e+08	1	1.06692	0.120125	0.871187	0.0118676
Bo5g132750.1		pep chromosome:v2.1:C5:41286150:41291394:-1 gene:Bo5g132750 transcript:Bo5g132750.1 gene_biotype:protein_coding transcript_biotype:protein_coding	30.0546	33	329	20	1	1281	139.2	5.92	High	High	High	High	High	High	High	High	High	High	High	High	1.662	895.93	33	7.76102e+07	7.12513e+07	7.20822e+07	8.13513e+07	8.20128e+07	7.67843e+07	9.16952e+07	9.54641e+07	7.88793e+07	1.21895e+08	1.0151e+08	9.81137e+07	7.36479e+07	1	8.00494e+07	1	8.86795e+07	1	1.07173e+08	1	0.92003	0.0685015	0.827443	0.108054
Bo6g029400.1	Malate dehydrogenase	pep chromosome:v2.1:C6:6844923:6846511:-1 gene:Bo6g029400 transcript:Bo6g029400.1 gene_biotype:protein_coding transcript_biotype:protein_coding description:Malate dehydrogenase :UniProtKB/TrEMBL;Acc:A0A0D3CQE1]	46.6276	14	275	1	1	341	35.7	8.27	Not Found	Not Found	Not Found	Not Found	Not Found	High	High	High	High	Not Found	Not Found	Not Found	9	895.36	14	NA	NA	NA	NA	NA	7.35477e+07	6.94248e+07	6.91775e+07	7.42105e+07	NA	NA	NA	NA	0	7.35477e+07	0.333333	7.09376e+07	1	NA	0	NA	NA	NA	NA
Bo8g037920.1	Obg-like ATPase 1	pep chromosome:v2.1:C8:13097133:13099546:1 gene:Bo8g037920 transcript:Bo8g037920.1 gene_biotype:protein_coding transcript_biotype:protein_coding description:Obg-like ATPase 1 :UniProtKB/TrEMBL;Acc:A0A0D3DLR0]	58.8832	23	332	3	1	394	44.5	7.01	High	High	High	High	High	High	High	Not Found	High	High	High	High	6.686	893.89	23	4.74407e+07	4.56734e+07	4.59601e+07	5.77217e+07	4.44459e+07	5.32218e+07	4.94535e+07	NA	3.63218e+07	3.99107e+07	3.68665e+07	2.78341e+07	4.63581e+07	1	5.17965e+07	1	4.28877e+07	0.666667	3.48704e+07	1	0.895005	0.239259	1.22992	0.321746
Bo3g058980.1		pep chromosome:v2.1:C3:22679847:22682044:1 gene:Bo3g058980 transcript:Bo3g058980.1 gene_biotype:protein_coding transcript_biotype:protein_coding	62.5	24	338	1	1	424	47.5	5.03	High	High	High	High	High	High	High	High	High	High	High	High	9.771	891.79	24	3.2343e+08	3.31175e+08	3.22309e+08	3.27615e+08	3.39047e+08	3.22082e+08	3.49468e+08	3.38605e+08	3.24792e+08	3.59432e+08	4.19302e+08	3.99204e+08	3.25638e+08	1	3.29581e+08	1	3.37621e+08	1	3.92646e+08	1	0.988036	0.528507	0.859863	0.0441943
Bo2g007280.1		pep chromosome:v2.1:C2:1391436:1399695:-1 gene:Bo2g007280 transcript:Bo2g007280.1 gene_biotype:protein_coding transcript_biotype:protein_coding	36.9176	40	408	5	1	1116	130.8	5.73	High	High	High	High	High	High	High	High	High	High	High	High	2.741	891.71	40	1.14753e+07	3.15971e+07	2.49693e+07	2.19852e+07	2.07148e+07	2.24744e+07	2.2837e+07	2.27822e+07	2.4744e+07	2.02091e+07	7.5215e+06	1.07055e+07	2.26805e+07	1	2.17248e+07	1	2.34544e+07	1	1.2812e+07	1	1.04399	0.880042	1.83065	0.0511969
Bo4g031090.1	S-adenosylmethionine synthase	pep chromosome:v2.1:C4:7052798:7053970:1 gene:Bo4g031090 transcript:Bo4g031090.1 gene_biotype:protein_coding transcript_biotype:protein_coding description:S-adenosylmethionine synthase :UniProtKB/TrEMBL;Acc:A0A0D3BRD3]	52.8205	17	351	2	1	390	42.5	6.18	High	High	High	High	High	High	High	High	High	High	High	High	8.261	890.62	17	1.63433e+08	1.75004e+08	1.85745e+08	1.63822e+08	1.64969e+08	1.54463e+08	2.47983e+08	1.2817e+08	1.61199e+08	1.31371e+08	1.41524e+08	1.43175e+08	1.74727e+08	1	1.61085e+08	1	1.79117e+08	1	1.3869e+08	1	1.08469	0.133056	1.29149	0.323331
Bo5g098110.1	PMH1 description	pep chromosome:v2.1:C5:31368018:31370342:-1 gene:Bo5g098110 transcript:Bo5g098110.1 gene_biotype:protein_coding transcript_biotype:protein_coding gene_symbol:PMH1 description:putative mitochondrial RNA helicase 1 :TAIR;Acc:AT3G22310](projected from arabidopsis_thaliana,AT3G22310)	41.9301	20	332	15	1	601	63.5	9.16	High	High	High	High	High	High	High	High	High	High	High	High	2.311	889.09	20	2.14522e+08	2.19919e+08	2.09667e+08	2.92915e+08	2.94585e+08	2.86046e+08	2.77907e+08	2.78302e+08	2.691e+08	1.97111e+08	1.89473e+08	1.84023e+08	2.14703e+08	1	2.91182e+08	1	2.75103e+08	1	1.90202e+08	1	0.737348	4.19023e-05	1.44637	6.20432e-05
Bo2g140450.1	Uridine kinase	pep chromosome:v2.1:C2:45283054:45286473:-1 gene:Bo2g140450 transcript:Bo2g140450.1 gene_biotype:protein_coding transcript_biotype:protein_coding description:Uridine kinase :UniProtKB/TrEMBL;Acc:A0A0D3AW48]	53.8302	22	342	7	1	483	54	6.68	High	High	High	High	High	High	High	High	High	High	High	High	6.017	888.4	22	1.19809e+08	1.22245e+08	1.17481e+08	1.3697e+08	1.29488e+08	1.21398e+08	1.78999e+08	1.70053e+08	1.84839e+08	1.92265e+08	1.81858e+08	1.72706e+08	1.19845e+08	1	1.29285e+08	1	1.77964e+08	1	1.82276e+08	1	0.926978	0.115099	0.97634	0.576369
Bo7g043440.1	Obg-like ATPase 1	pep chromosome:v2.1:C7:15929778:15932890:1 gene:Bo7g043440 transcript:Bo7g043440.1 gene_biotype:protein_coding transcript_biotype:protein_coding description:Obg-like ATPase 1 :UniProtKB/TrEMBL;Acc:A0A0D3D5R5]	58.8832	23	334	3	1	394	44.5	7.01	High	High	Not Found	High	High	Not Found	High	High	High	High	High	High	6.197	886.92	23	4.32474e+07	3.48196e+07	NA	5.46295e+07	3.82432e+07	NA	4.7719e+07	4.69272e+07	5.5752e+07	4.66773e+07	3.77951e+07	4.07123e+07	3.90335e+07	0.666667	4.64364e+07	0.666667	5.01327e+07	1	4.17282e+07	1	0.84058	0.506004	1.20141	0.0940899
Bo1g105200.1		pep chromosome:v2.1:C1:32083849:32086303:-1 gene:Bo1g105200 transcript:Bo1g105200.1 gene_biotype:protein_coding transcript_biotype:protein_coding	46.9649	24	341	19	1	626	66.3	9.38	High	High	High	High	High	High	High	High	High	High	High	High	2.594	885.41	24	1.80842e+08	1.89314e+08	1.82007e+08	1.98977e+08	1.92202e+08	1.95434e+08	1.96138e+08	2.3164e+08	1.88319e+08	2.00835e+08	2.0007e+08	1.92453e+08	1.84054e+08	1	1.95538e+08	1	2.05365e+08	1	1.97786e+08	1	0.941273	0.0252369	1.03832	0.606932
Bo6g121940.1		pep chromosome:v2.1:C6:38855133:38857514:1 gene:Bo6g121940 transcript:Bo6g121940.1 gene_biotype:protein_coding transcript_biotype:protein_coding	52.1739	17	330	4	1	299	33.5	4.87	High	High	High	High	High	High	High	High	High	High	High	High	4.298	884.26	17	1.68024e+08	1.58508e+08	1.71383e+08	1.64642e+08	2.29092e+08	1.5929e+08	1.57219e+08	2.2771e+08	1.49491e+08	2.6376e+08	1.85588e+08	1.7455e+08	1.65972e+08	1	1.84341e+08	1	1.7814e+08	1	2.07966e+08	1	0.900351	0.464827	0.856583	0.471144
Bo6g080380.1		pep chromosome:v2.1:C6:24453767:24460036:-1 gene:Bo6g080380 transcript:Bo6g080380.1 gene_biotype:protein_coding transcript_biotype:protein_coding	43.2184	34	368	8	1	870	99.1	8	High	High	High	High	High	High	High	High	High	High	High	High	2.548	884.07	34	4.234e+07	5.43428e+07	6.55333e+07	4.53428e+07	8.57644e+07	5.23207e+07	6.45228e+07	4.55071e+07	7.14193e+07	4.45663e+07	3.24544e+07	5.82229e+07	5.4072e+07	1	6.11426e+07	1	6.04831e+07	1	4.50812e+07	1	0.884359	0.643722	1.34165	0.225002
Bo5g008580.1		pep chromosome:v2.1:C5:2934356:2935750:1 gene:Bo5g008580 transcript:Bo5g008580.1 gene_biotype:protein_coding transcript_biotype:protein_coding	64	12	332	5	1	250	27.7	5.92	High	High	High	High	High	High	High	High	High	High	High	High	7.913	883	12	2.72264e+08	2.68036e+08	3.00485e+08	2.47781e+08	2.75243e+08	2.65601e+08	3.01899e+08	3.3261e+08	3.21631e+08	3.20116e+08	3.23943e+08	3.12695e+08	2.80262e+08	1	2.62875e+08	1	3.18714e+08	1	3.18918e+08	1	1.06614	0.251396	0.999359	0.983989
Bo4g077010.1		pep chromosome:v2.1:C4:16779438:16784062:-1 gene:Bo4g077010 transcript:Bo4g077010.1 gene_biotype:protein_coding transcript_biotype:protein_coding	43.3369	38	410	13	1	923	103.3	8.69	High	High	High	High	High	High	High	High	High	High	High	High	3.303	881.35	38	8.4031e+07	8.48127e+07	7.126e+07	3.35395e+07	5.81495e+07	9.28376e+07	1.19413e+08	1.10621e+08	1.17265e+08	8.43004e+07	7.79729e+07	8.48245e+07	8.00346e+07	1	6.15089e+07	1	1.15766e+08	1	8.23659e+07	1	1.30119	0.3556	1.40551	0.000631751
Bo2g161000.1	SCPL34 description	pep chromosome:v2.1:C2:50421486:50425488:-1 gene:Bo2g161000 transcript:Bo2g161000.1 gene_biotype:protein_coding transcript_biotype:protein_coding gene_symbol:SCPL34 description:serine carboxypeptidase-like 34 :TAIR;Acc:AT5G23210](projected from arabidopsis_thaliana,AT5G23210)	35.9841	15	344	15	1	503	56.6	7.9	High	High	High	High	High	High	High	High	High	High	High	High	2.257	881.26	15	3.21404e+08	3.30997e+08	3.32192e+08	2.58118e+08	2.59535e+08	2.57833e+08	3.62262e+08	3.61847e+08	3.79493e+08	5.48801e+08	5.40227e+08	5.33674e+08	3.28198e+08	1	2.58495e+08	1	3.67867e+08	1	5.409e+08	1	1.26965	3.56188e-05	0.680102	1.85716e-05
Bo6g022160.1		pep chromosome:v2.1:C6:4685210:4689118:1 gene:Bo6g022160 transcript:Bo6g022160.1 gene_biotype:protein_coding transcript_biotype:protein_coding	30.3548	22	350	10	1	761	86.3	5.96	High	High	High	High	High	High	High	High	High	High	High	High	2.162	876.69	22	1.47324e+08	1.56817e+08	1.62094e+08	1.27278e+08	1.40703e+08	1.44874e+08	1.09266e+08	1.32595e+08	1.18571e+08	1.15533e+08	1.06044e+08	1.02245e+08	1.55412e+08	1	1.37618e+08	1	1.20144e+08	1	1.0794e+08	1	1.1293	0.060085	1.11306	0.194917
Bo9g062940.1		pep chromosome:v2.1:C9:19067214:19071881:1 gene:Bo9g062940 transcript:Bo9g062940.1 gene_biotype:protein_coding transcript_biotype:protein_coding	36.0595	39	404	9	1	1076	122.1	6.74	High	High	High	High	High	High	High	High	High	High	High	High	1.658	874.49	39	6.73644e+07	1.08707e+08	1.03193e+08	1.25176e+08	1.25232e+08	1.2417e+08	8.19662e+07	7.53738e+07	7.70593e+07	7.88043e+07	7.22593e+07	7.14872e+07	9.30881e+07	1	1.24859e+08	1	7.81331e+07	1	7.41836e+07	1	0.745544	0.0703994	1.05324	0.264925
Bo7g101180.1		pep chromosome:v2.1:C7:39402288:39404131:-1 gene:Bo7g101180 transcript:Bo7g101180.1 gene_biotype:protein_coding transcript_biotype:protein_coding	39.2638	15	343	7	1	326	35.6	7.58	High	High	High	High	High	High	High	High	High	High	High	High	8.047	874.09	15	1.70756e+08	1.58753e+08	1.58569e+08	1.7244e+08	1.68473e+08	1.71733e+08	1.90241e+08	1.87057e+08	1.8357e+08	1.53058e+08	1.42021e+08	1.44341e+08	1.62693e+08	1	1.70882e+08	1	1.86956e+08	1	1.46474e+08	1	0.952076	0.123845	1.27638	0.000473388
Bo6g099590.1	Isocitrate dehydrogenase [NADP]	pep chromosome:v2.1:C6:31706084:31708902:1 gene:Bo6g099590 transcript:Bo6g099590.1 gene_biotype:protein_coding transcript_biotype:protein_coding description:Isocitrate dehydrogenase [NADP] :UniProtKB/TrEMBL;Acc:A0A0D3CYA3]	58.4951	28	347	7	1	412	46	6.74	High	High	High	High	High	High	High	High	High	High	High	High	8.441	871.89	28	1.7295e+08	1.10662e+08	1.50487e+08	1.66405e+08	1.70349e+08	1.6596e+08	1.63532e+08	1.57432e+08	1.56942e+08	1.21173e+08	1.21485e+08	1.20009e+08	1.44699e+08	1	1.67571e+08	1	1.59302e+08	1	1.20889e+08	1	0.863511	0.278729	1.31775	5.95026e-05
Bo5g148500.1		pep chromosome:v2.1:C5:45811386:45814680:-1 gene:Bo5g148500 transcript:Bo5g148500.1 gene_biotype:protein_coding transcript_biotype:protein_coding	35.4779	19	353	2	1	544	58.2	5.52	High	Not Found	Not Found	Not Found	High	Not Found	Not Found	High	High	High	High	High	2.415	871.72	19	2.54301e+07	NA	NA	NA	2.89663e+07	NA	NA	4.48681e+07	4.46488e+07	4.12103e+07	3.58766e+07	3.90797e+07	2.54301e+07	0.333333	2.89663e+07	0.333333	4.47584e+07	0.666667	3.87222e+07	1	0.87792	NA	1.15589	0.0570307
Bo4g116910.1		pep chromosome:v2.1:C4:29969092:29970461:-1 gene:Bo4g116910 transcript:Bo4g116910.1 gene_biotype:protein_coding transcript_biotype:protein_coding	39.6104	10	364	10	1	154	17.3	10.23	High	High	High	High	High	High	High	High	High	High	High	High	16.783	871.17	10	1.93663e+09	1.84467e+09	1.818e+09	2.00977e+09	1.93059e+09	1.99531e+09	1.77766e+09	1.7662e+09	1805030057	1.86587e+09	1.81989e+09	1.87025e+09	1.86643e+09	1	1.97856e+09	1	1.78296e+09	1	1.852e+09	1	0.943331	0.0611128	0.96272	0.0251996
Bo7g044920.1		pep chromosome:v2.1:C7:16411709:16414874:1 gene:Bo7g044920 transcript:Bo7g044920.1 gene_biotype:protein_coding transcript_biotype:protein_coding	39.4773	28	411	4	1	727	81.5	7.15	High	High	High	High	High	High	High	High	High	High	High	High	2.108	870.62	28	4.03063e+08	4.14065e+08	1.08095e+08	1.51115e+08	1.59894e+08	1.10891e+08	1.20867e+08	1.17636e+08	4.77756e+07	1.013e+08	3.29373e+08	1.04029e+08	3.08408e+08	1	1.40634e+08	1	9.54262e+07	1	1.78234e+08	1	2.19299	0.173139	0.535398	0.355033
Bo4g078540.1		pep chromosome:v2.1:C4:17899195:17901414:1 gene:Bo4g078540 transcript:Bo4g078540.1 gene_biotype:protein_coding transcript_biotype:protein_coding	67.1679	24	460	23	1	399	44.7	8.18	High	High	High	High	High	High	High	High	High	High	High	High	5.469	870.07	24	3.42246e+08	3.47212e+08	3.38064e+08	3.96227e+08	3.96581e+08	3.86398e+08	3.87579e+08	4.37063e+08	3.9903e+08	4.06554e+08	3.64502e+08	3.97968e+08	3.42507e+08	1	3.93069e+08	1	4.07891e+08	1	3.89674e+08	1	0.871367	0.000287896	1.04675	0.407549
Bo2g156270.1		pep chromosome:v2.1:C2:49068877:49073122:1 gene:Bo2g156270 transcript:Bo2g156270.1 gene_biotype:protein_coding transcript_biotype:protein_coding	41.4127	33	383	6	1	722	81.5	7.66	High	High	High	High	High	High	High	High	High	High	High	High	2.924	868.35	33	1.55313e+08	1.64077e+08	1.40966e+08	1.62404e+08	1.57894e+08	1.52588e+08	1.84445e+08	1.87267e+08	1.8199e+08	1.54043e+08	1.44101e+08	1.52614e+08	1.53452e+08	1	1.57629e+08	1	1.84567e+08	1	1.50252e+08	1	0.973505	0.598304	1.22838	0.000578751
Bo9g152450.1	Tubulin alpha chain	pep chromosome:v2.1:C9:45536852:45538534:-1 gene:Bo9g152450 transcript:Bo9g152450.1 gene_biotype:protein_coding transcript_biotype:protein_coding description:Tubulin alpha chain :UniProtKB/TrEMBL;Acc:A0A0D3EDY8]	40.8889	16	345	1	1	450	49.6	5.1	High	High	High	High	High	High	High	High	High	High	High	High	8.152	868.02	16	NA	3.03149e+07	2.60239e+07	2.28409e+07	2.89197e+07	2.20893e+07	3.42694e+07	NA	4.20813e+07	5.11705e+07	1.11402e+07	NA	2.81694e+07	0.666667	2.46166e+07	1	3.81753e+07	0.666667	3.11553e+07	0.666667	1.14432	0.350093	1.22532	0.763491
Bo1g011450.1	Proteasome subunit beta type	pep chromosome:v2.1:C1:4077294:4079375:-1 gene:Bo1g011450 transcript:Bo1g011450.1 gene_biotype:protein_coding transcript_biotype:protein_coding description:Proteasome subunit beta type :UniProtKB/TrEMBL;Acc:A0A0D3A2X0]	60.0858	15	299	15	1	233	25.1	5.36	High	High	High	High	High	High	High	High	High	High	High	High	13.678	867.46	15	6.92265e+08	6.63786e+08	6.47566e+08	6.61227e+08	6.47323e+08	6.32353e+08	5.99106e+08	6.10144e+08	6.22783e+08	7.24594e+08	7.39979e+08	6.83927e+08	6.67872e+08	1	6.46968e+08	1	6.10678e+08	1	7.16167e+08	1	1.03231	0.248674	0.852704	0.00428805
Bo2g041550.1		pep chromosome:v2.1:C2:11089214:11091825:1 gene:Bo2g041550 transcript:Bo2g041550.1 gene_biotype:protein_coding transcript_biotype:protein_coding	53.125	29	374	29	1	704	75.9	5.59	High	High	High	High	High	High	High	High	High	High	High	High	7.449	865.83	29	2.66633e+08	2.67866e+08	2.69274e+08	3.36812e+08	3.4324e+08	3.62893e+08	3.46327e+08	3.44907e+08	3.46145e+08	3.82544e+08	3.57173e+08	3.66659e+08	2.67924e+08	1	3.47648e+08	1	3.45793e+08	1	3.68792e+08	1	0.770676	0.000537699	0.937637	0.0361553
Bo9g058600.1	Proteasome subunit alpha type	pep chromosome:v2.1:C9:17102783:17104636:-1 gene:Bo9g058600 transcript:Bo9g058600.1 gene_biotype:protein_coding transcript_biotype:protein_coding description:Proteasome subunit alpha type :UniProtKB/TrEMBL;Acc:A0A0D3E636]	54.2857	15	278	6	1	280	30.4	5.2	High	High	High	High	High	High	High	High	High	High	High	High	10.22	865.78	15	1.96798e+08	2.04981e+08	2.50482e+08	2.6007e+08	2.77758e+08	2.72515e+08	2.53846e+08	2.60246e+08	237052666	2.85775e+08	2.87487e+08	2.95276e+08	2.1742e+08	1	2.70114e+08	1	2.50381e+08	1	2.89513e+08	1	0.80492	0.0395293	0.864837	0.00646424
Bo1g008060.1	DHS2 description	pep chromosome:v2.1:C1:2808893:2811478:-1 gene:Bo1g008060 transcript:Bo1g008060.1 gene_biotype:protein_coding transcript_biotype:protein_coding gene_symbol:DHS2 description:3-deoxy-d-arabino-heptulosonate 7-phosphate synthase :TAIR;Acc:AT4G33510](projected from arabidopsis_thaliana,AT4G33510)	33.4646	15	322	12	1	508	56.6	8.29	High	High	High	High	High	High	High	High	High	High	High	High	2.35	862.56	15	6.02528e+08	5.98742e+08	6.46259e+08	4.81977e+08	4.89056e+08	5.29254e+08	5.30338e+08	5.58357e+08	5.67683e+08	4.34206e+08	4.65775e+08	4.90423e+08	6.15843e+08	1	5.00096e+08	1	5.52126e+08	1	4.63468e+08	1	1.23145	0.00546605	1.19129	0.0109411
Bo9g078170.1	BEST Arabidopsis thaliana protein match is	pep chromosome:v2.1:C9:23869911:23870486:1 gene:Bo9g078170 transcript:Bo9g078170.1 gene_biotype:protein_coding transcript_biotype:protein_coding description:BEST Arabidopsis thaliana protein match is: glycine-rich protein (TAIR:AT1G27090.1); Has 51 Blast hits to 50 proteins in 15 species: Archae - 0; Bacteria - 2; Metazoa - 0; Fungi - 0; Plants - 47; Viruses - 0; Other Eukaryotes - 2 (source: NCB…	63.6364	9	315	8	1	165	18.2	9.23	High	High	High	High	High	High	High	High	High	High	High	High	7.254	861.81	9	5.57246e+08	5.43454e+08	3.75219e+08	8.32973e+08	8.34958e+08	7.611e+08	6.64198e+08	6.74402e+08	6.56408e+08	3.49325e+08	1.62315e+08	3.50696e+08	4.91973e+08	1	8.09677e+08	1	6.65003e+08	1	2.87445e+08	1	0.607617	0.00741362	2.31349	0.00385023
Bo6g074890.1		pep chromosome:v2.1:C6:21890092:21893042:1 gene:Bo6g074890 transcript:Bo6g074890.1 gene_biotype:protein_coding transcript_biotype:protein_coding	39.4343	21	323	3	1	601	65	7.33	High	High	High	High	High	High	Not Found	Not Found	High	High	Not Found	High	3.885	860.06	21	3.56122e+07	3.5251e+07	NA	4.2345e+07	4.00366e+07	1.68857e+07	NA	NA	50709214	5.10883e+07	NA	3.7748e+07	3.54316e+07	0.666667	3.30891e+07	1	50709214	0.333333	4.44182e+07	0.666667	1.07079	0.837721	1.14163	NA
Bo2g155330.1	Mitochondrial Rho GTPase	pep chromosome:v2.1:C2:48417260:48421638:1 gene:Bo2g155330 transcript:Bo2g155330.1 gene_biotype:protein_coding transcript_biotype:protein_coding description:Mitochondrial Rho GTPase :UniProtKB/TrEMBL;Acc:A0A0D3AX97]	33.6434	20	293	8	1	645	71.4	5.25	High	High	High	High	High	High	High	High	High	High	High	High	2.495	855.14	20	6.80734e+07	8.89673e+07	7.98731e+07	1.02394e+08	1.15739e+08	1.12583e+08	1.10656e+08	1.04012e+08	1.0606e+08	8.84494e+07	7.47309e+07	6.98458e+07	7.89713e+07	1	1.10238e+08	1	1.06909e+08	1	7.76754e+07	1	0.716367	0.0126149	1.37636	0.00775656
Bo3g168980.1	D-3-phosphoglycerate dehydrogenase	pep chromosome:v2.1:C3:59650868:59652879:1 gene:Bo3g168980 transcript:Bo3g168980.1 gene_biotype:protein_coding transcript_biotype:protein_coding description:D-3-phosphoglycerate dehydrogenase :UniProtKB/TrEMBL;Acc:A0A0D3BLF4]	35.2159	22	349	6	1	602	63.2	6.15	High	High	High	High	High	High	High	High	High	High	High	High	3.467	851.13	22	2.4081e+08	2.27887e+08	2.56019e+08	2.15592e+08	3.2525e+08	2.18924e+08	2.5724e+08	2.41348e+08	2.24743e+08	2.80115e+08	2.46782e+08	1.83257e+08	2.41572e+08	1	2.53255e+08	1	2.4111e+08	1	2.36718e+08	1	0.953868	0.767469	1.01855	0.890391
Bo5g044930.1		pep chromosome:v2.1:C5:15045150:15045893:1 gene:Bo5g044930 transcript:Bo5g044930.1 gene_biotype:protein_coding transcript_biotype:protein_coding	51.8219	15	340	3	1	247	26.9	4.78	High	High	High	High	High	High	High	High	High	High	High	High	14.849	848.3	15	4.14254e+07	4.66624e+07	4.81821e+07	1.17574e+08	7.25516e+07	6.88006e+07	4.76985e+07	4.81844e+07	6.82694e+07	3.99033e+07	4.42318e+07	3.34916e+07	4.54233e+07	1	8.63087e+07	1	5.47174e+07	1	3.92089e+07	1	0.526288	0.0608653	1.39554	0.10619
Bo9g164120.1		pep chromosome:v2.1:C9:48531745:48535466:1 gene:Bo9g164120 transcript:Bo9g164120.1 gene_biotype:protein_coding transcript_biotype:protein_coding	38.5406	33	328	9	1	973	109.1	5.99	High	High	High	High	High	High	High	High	High	High	High	High	1.703	848.29	33	6.02632e+07	5.57907e+07	5.3035e+07	8.72581e+07	8.06879e+07	7.10245e+07	6.76005e+07	8.37003e+07	8.01008e+07	5.24887e+07	6.81703e+07	6.20708e+07	5.63629e+07	1	7.96569e+07	1	7.71338e+07	1	6.09099e+07	1	0.707572	0.0107301	1.26636	0.0720979
Bo2g108840.1	Eukaryotic translation initiation factor 3 subunit A	pep chromosome:v2.1:C2:32310647:32314853:1 gene:Bo2g108840 transcript:Bo2g108840.1 gene_biotype:protein_coding transcript_biotype:protein_coding description:Eukaryotic translation initiation factor 3 subunit A :UniProtKB/TrEMBL;Acc:A0A0D3AT16]	35.0453	34	356	3	1	993	115	9.03	High	High	High	High	High	High	High	High	High	High	Not Found	Not Found	1.867	843.98	34	2.31905e+07	2.92957e+07	3.15591e+06	3.07424e+07	1.64655e+07	1.46641e+07	3.2437e+07	3.85421e+07	36931420	9.95585e+06	NA	NA	1.85474e+07	1	2.0624e+07	1	3.59702e+07	1	9.95585e+06	0.333333	0.89931	0.835826	3.61297	NA
Bo1g158790.1		pep chromosome:v2.1:C1:43662377:43667003:1 gene:Bo1g158790 transcript:Bo1g158790.1 gene_biotype:protein_coding transcript_biotype:protein_coding	53.6232	12	282	5	1	276	29.3	8.65	High	High	High	High	High	High	High	High	High	High	High	High	5.31	843.46	12	1.48746e+08	1.53162e+08	1.59641e+08	1.54761e+08	1.59292e+08	1.67868e+08	2.69804e+08	2.7855e+08	2.76001e+08	2.60359e+08	2.88852e+08	2.92982e+08	1.5385e+08	1	1.6064e+08	1	2.74785e+08	1	2.80731e+08	1	0.957728	0.24424	0.978818	0.604065
Bo3g166960.1		pep chromosome:v2.1:C3:58801778:58803533:1 gene:Bo3g166960 transcript:Bo3g166960.1 gene_biotype:protein_coding transcript_biotype:protein_coding	36.6391	11	280	2	1	363	39.3	8.47	High	High	High	High	High	High	High	High	High	High	High	High	4.878	842.99	11	1.37226e+08	1.32893e+08	1.15846e+08	9.41236e+07	1.11263e+08	1.02104e+08	8.82128e+07	9.57479e+07	1.00342e+08	8.92279e+07	1.05015e+08	1.05713e+08	1.28655e+08	1	1.02497e+08	1	9.47674e+07	1	9.99851e+07	1	1.25521	0.0331094	0.947815	0.463246
Bo5g017360.1	Phosphofructokinase family protein	pep chromosome:v2.1:C5:5795018:5798321:1 gene:Bo5g017360 transcript:Bo5g017360.1 gene_biotype:protein_coding transcript_biotype:protein_coding description:Phosphofructokinase family protein :TAIR;Acc:AT1G12000](projected from arabidopsis_thaliana,AT1G12000)	34.4523	19	317	19	1	566	61.4	6.1	High	High	High	High	High	High	High	High	High	High	High	High	3.642	842.85	19	4.2253e+08	4.07685e+08	3.80054e+08	3.96215e+08	4.03246e+08	4.01222e+08	3.48134e+08	1.20009e+09	3.5402e+08	3.27136e+08	2.83953e+08	1.79225e+09	4.03423e+08	1	4.00228e+08	1	6.34082e+08	1	8.01114e+08	1	1.00798	0.812596	0.7915	0.784367
Bo6g113130.1	Peroxidase superfamily protein	pep chromosome:v2.1:C6:35647750:35649740:1 gene:Bo6g113130 transcript:Bo6g113130.1 gene_biotype:protein_coding transcript_biotype:protein_coding description:Peroxidase superfamily protein :TAIR;Acc:AT1G71695](projected from arabidopsis_thaliana,AT1G71695)	39.779	13	341	13	1	362	39.7	8.44	High	High	High	High	High	High	High	High	High	High	High	High	4.754	842.68	13	7.58137e+08	7.16475e+08	7.13898e+08	5.45263e+08	5.46564e+08	5.26496e+08	3.98819e+08	3.60353e+08	3.85604e+08	5.12449e+08	5.70327e+08	5.29532e+08	7.29503e+08	1	5.39441e+08	1	3.81592e+08	1	5.37436e+08	1	1.35233	0.000269358	0.710023	0.00161995
Bo4g190670.1	S-adenosyl-L-methionine-dependent methyltransferases superfamily protein	pep chromosome:v2.1:C4:51345656:51347489:1 gene:Bo4g190670 transcript:Bo4g190670.1 gene_biotype:protein_coding transcript_biotype:protein_coding description:S-adenosyl-L-methionine-dependent methyltransferases superfamily protein :TAIR;Acc:AT2G41040](projected from arabidopsis_thaliana,AT2G41040)	34.3434	13	326	13	1	396	44.2	7.52	High	High	High	High	High	High	High	High	High	High	High	High	4.055	841.98	13	9.57698e+08	1.02818e+09	1.05529e+09	8.56498e+08	9.12815e+08	9.2358e+08	8.8085e+08	9.63005e+08	9.7089e+08	1.24239e+09	1.24318e+09	1.27389e+09	1.01372e+09	1	8.97631e+08	1	9.38248e+08	1	1.25316e+09	1	1.12933	0.0314754	0.748708	0.000502896
Bo2g093360.1		pep chromosome:v2.1:C2:25834124:25835562:1 gene:Bo2g093360 transcript:Bo2g093360.1 gene_biotype:protein_coding transcript_biotype:protein_coding	53.4615	15	332	3	1	260	29.3	4.7	High	High	High	High	High	High	High	High	High	High	High	High	4.878	840.13	15	8.93372e+07	8.21341e+07	7.38795e+07	1.05997e+08	1.11138e+08	9.15968e+07	1.01577e+08	9.69206e+07	9.01127e+07	1.12193e+08	9.94601e+07	1.02031e+08	8.17836e+07	1	1.0291e+08	1	9.62035e+07	1	1.04561e+08	1	0.794706	0.0454162	0.920069	0.177796
Bo6g125580.1		pep chromosome:v2.1:C6:39686055:39692634:1 gene:Bo6g125580 transcript:Bo6g125580.1 gene_biotype:protein_coding transcript_biotype:protein_coding	34.1916	30	340	2	1	971	110.7	8.63	High	High	High	High	High	High	High	High	High	High	High	High	1.673	837.88	30	1.1033e+07	7.00629e+07	5.01619e+07	4.65761e+07	5.62634e+07	3.03915e+07	3.63603e+07	3.82439e+07	1.0326e+08	2.67491e+07	2.46176e+07	3.44975e+07	4.37526e+07	1	4.44103e+07	1	5.92881e+07	1	2.86214e+07	1	0.985189	0.973919	2.07146	0.23925
Bo6g083260.1	LACS9 description	pep chromosome:v2.1:C6:25885304:25888163:1 gene:Bo6g083260 transcript:Bo6g083260.1 gene_biotype:protein_coding transcript_biotype:protein_coding gene_symbol:LACS9 description:long chain acyl-CoA synthetase 9 :TAIR;Acc:AT1G77590](projected from arabidopsis_thaliana,AT1G77590)	27.8499	18	310	18	1	693	75.9	6.67	High	High	High	High	High	High	High	High	High	High	High	High	2.403	836.53	18	2.00901e+09	1.85146e+09	1.88321e+09	2.36729e+09	2.23748e+09	2.31788e+09	1.70934e+09	1.75598e+09	1861171779	1.79201e+09	1.7206e+09	1.74652e+09	1.91456e+09	1	2.30755e+09	1	1.7755e+09	1	1.75304e+09	1	0.829691	0.00302255	1.01281	0.673703
Bo4g166700.1	Histone H2B	pep chromosome:v2.1:C4:44767662:44768126:1 gene:Bo4g166700 transcript:Bo4g166700.1 gene_biotype:protein_coding transcript_biotype:protein_coding description:Histone H2B :UniProtKB/TrEMBL;Acc:A0A0D3C2P1]	62.3377	11	284	1	1	154	16.6	10.02	High	High	High	High	High	High	High	High	High	High	High	High	10.548	835.88	11	2.996e+08	1.71984e+08	3.02936e+08	2.18119e+08	3.31748e+08	3.54312e+08	3.32276e+08	3.30992e+08	3.46807e+08	4.21393e+08	4.2513e+08	3.28331e+08	2.58173e+08	1	3.01393e+08	1	3.36691e+08	1	3.91618e+08	1	0.8566	0.513045	0.859745	0.161882
Bo2g013180.1		pep chromosome:v2.1:C2:4034027:4036419:-1 gene:Bo2g013180 transcript:Bo2g013180.1 gene_biotype:protein_coding transcript_biotype:protein_coding	35.1648	21	357	3	1	637	71.4	6.73	High	High	High	High	High	High	High	High	High	High	High	High	2.455	835.25	21	1.04137e+08	7.66212e+07	1.51905e+08	1.59963e+08	1.49851e+08	1.57727e+08	1.79935e+08	1.83166e+08	1.63675e+08	1.50797e+08	1.04524e+08	1.4243e+08	1.10888e+08	1	1.55847e+08	1	1.75592e+08	1	1.32584e+08	1	0.711515	0.112896	1.32439	0.04973
Bo8g043260.1	Importin subunit alpha	pep chromosome:v2.1:C8:14737644:14740326:-1 gene:Bo8g043260 transcript:Bo8g043260.1 gene_biotype:protein_coding transcript_biotype:protein_coding description:Importin subunit alpha :UniProtKB/TrEMBL;Acc:A0A0D3DM48]	35.0187	14	260	6	1	534	58.8	5.14	High	High	High	High	High	High	High	High	High	High	High	High	3.758	835.13	14	1.2059e+08	1.18625e+08	1.16583e+08	1.4159e+08	1.44845e+08	1.39954e+08	1.40046e+08	1.57609e+08	1.58529e+08	1.52679e+08	1.34747e+08	1.42357e+08	1.18599e+08	1	1.4213e+08	1	1.52061e+08	1	1.43261e+08	1	0.834443	0.000217847	1.06143	0.330264
Bo9g076450.1	NDB2 description	pep chromosome:v2.1:C9:23248304:23251923:-1 gene:Bo9g076450 transcript:Bo9g076450.1 gene_biotype:protein_coding transcript_biotype:protein_coding gene_symbol:NDB2 description:NAD(P)H dehydrogenase B2 :TAIR;Acc:AT4G05020](projected from arabidopsis_thaliana,AT4G05020)	35.5786	20	333	19	1	579	64.9	8.15	High	High	High	High	High	High	High	High	High	High	High	High	2.162	833.44	20	2.89725e+08	2.80488e+08	2.87877e+08	3.41258e+08	3.4098e+08	3.33559e+08	2.78993e+08	2.89222e+08	3.13163e+08	3.16628e+08	3.05576e+08	3.16924e+08	2.8603e+08	1	3.38599e+08	1	2.93793e+08	1	3.13043e+08	1	0.844745	0.000155702	0.938507	0.149037
Bo4g139920.1		pep chromosome:v2.1:C4:37388125:37391704:-1 gene:Bo4g139920 transcript:Bo4g139920.1 gene_biotype:protein_coding transcript_biotype:protein_coding	60.5932	24	309	24	1	472	54.7	6.58	High	High	High	High	High	High	High	High	High	High	High	High	5.449	833.29	24	2.30857e+08	2.52806e+08	2.16814e+08	2.64853e+08	2.54317e+08	2.58312e+08	2.81178e+08	2.64983e+08	2.89283e+08	2.66881e+08	2.5137e+08	2.55522e+08	2.33492e+08	1	2.59161e+08	1	2.78482e+08	1	2.57924e+08	1	0.900957	0.0783613	1.0797	0.0732354
Bo5g131890.1	Acetyltransferase component of pyruvate dehydrogenase complex	pep chromosome:v2.1:C5:40725272:40728943:-1 gene:Bo5g131890 transcript:Bo5g131890.1 gene_biotype:protein_coding transcript_biotype:protein_coding description:Acetyltransferase component of pyruvate dehydrogenase complex :UniProtKB/TrEMBL;Acc:A0A0D3CKF1]	26.5306	15	284	3	1	539	58.7	7.9	High	High	High	High	High	High	High	High	High	High	High	High	2.001	832.31	15	6.0543e+07	5.42172e+07	5.20461e+07	6.48775e+07	7.00923e+07	7.02199e+07	4.50347e+07	4.49696e+07	4.84958e+07	4.08978e+07	3.90891e+07	3.62457e+07	5.56021e+07	1	6.83966e+07	1	4.61667e+07	1	3.87442e+07	1	0.812937	0.0144839	1.19158	0.0141916
Bo7g064660.1	Dolichyl-diphosphooligosaccharide--protein glycosyltransferase 48 kDa subunit	pep chromosome:v2.1:C7:24377696:24380331:1 gene:Bo7g064660 transcript:Bo7g064660.1 gene_biotype:protein_coding transcript_biotype:protein_coding description:Dolichyl-diphosphooligosaccharide--protein glycosyltransferase 48 kDa subunit :UniProtKB/TrEMBL;Acc:A0A0D3D8E9]	45.7666	19	369	5	1	437	48.8	6.67	High	High	High	High	High	High	High	High	High	High	High	High	3.642	830.64	19	1.64414e+08	1.77901e+08	2.09389e+08	2.35053e+08	2.31859e+08	2.32331e+08	2.19786e+08	2.70412e+08	2.19783e+08	2.61147e+08	2.49618e+08	2.98262e+08	1.83901e+08	1	2.33081e+08	1	2.3666e+08	1	2.69676e+08	1	0.789002	0.0211962	0.877573	0.213916
Bo9g178990.1		pep chromosome:v2.1:C9:53328897:53329307:1 gene:Bo9g178990 transcript:Bo9g178990.1 gene_biotype:protein_coding transcript_biotype:protein_coding	59.5588	10	329	1	1	136	15.6	10.1	High	Not Found	Not Found	High	Not Found	Not Found	Not Found	Not Found	Not Found	Not Found	High	High	122.285	828.93	10	5.29684e+07	NA	NA	4.48845e+07	NA	NA	NA	NA	NA	NA	2.78181e+07	3.31864e+07	5.29684e+07	0.333333	4.48845e+07	0.333333	NA	0	3.05023e+07	0.666667	1.18011	NA	NA	NA
Bo7g116730.1	EDA9 description	pep chromosome:v2.1:C7:46622911:46625098:-1 gene:Bo7g116730 transcript:Bo7g116730.1 gene_biotype:protein_coding transcript_biotype:protein_coding gene_symbol:EDA9 description:D-3-phosphoglycerate dehydrogenase :TAIR;Acc:AT4G34200](projected from arabidopsis_thaliana,AT4G34200)	34.7826	21	324	5	1	598	62.7	6.89	High	High	High	High	High	High	High	High	High	High	High	High	2.615	828.69	21	1.17317e+08	1.41091e+08	1.24659e+08	1.0883e+08	9.97009e+07	1.01039e+08	8.16637e+07	7.73182e+07	9.37909e+07	8.31696e+07	8.9749e+07	7.83317e+07	1.27689e+08	1	1.0319e+08	1	8.42576e+07	1	8.37501e+07	1	1.23742	0.0319469	1.00606	0.935983
Bo01031s010.1		pep scaffold:v2.1:Scaffold01031:6531:10541:1 gene:Bo01031s010 transcript:Bo01031s010.1 gene_biotype:protein_coding transcript_biotype:protein_coding	45.393	34	334	7	1	738	86.1	7.27	High	High	High	High	High	High	High	High	High	High	High	High	4.895	828.2	34	8.84752e+07	6.54915e+07	8.6872e+07	9.32632e+07	9.8051e+07	8.71431e+07	6.93885e+07	1.04363e+08	1.12894e+08	8.4586e+07	8.39714e+07	7.67073e+07	8.02796e+07	1	9.28191e+07	1	9.55484e+07	1	8.17549e+07	1	0.864904	0.194431	1.16872	0.366196
Bo5g005110.1	ATPDIL2-2 description	pep chromosome:v2.1:C5:1587635:1590423:-1 gene:Bo5g005110 transcript:Bo5g005110.1 gene_biotype:protein_coding transcript_biotype:protein_coding gene_symbol:ATPDIL2-2 description:PDI-like 2-2 :TAIR;Acc:AT1G04980](projected from arabidopsis_thaliana,AT1G04980)	38.5845	17	328	15	1	438	47.4	7.33	High	High	High	High	High	High	High	High	High	High	High	High	3.642	826.47	17	7.75422e+08	7.31788e+08	7.20915e+08	5.96318e+08	5.71421e+08	5.90892e+08	5.7807e+08	6.2149e+08	5.97533e+08	7.55003e+08	6.98551e+08	7.26641e+08	7.42709e+08	1	5.86211e+08	1	5.99031e+08	1	7.26731e+08	1	1.26697	0.00102432	0.824281	0.00342692
Bo7g050250.1		pep chromosome:v2.1:C7:18486461:18489006:-1 gene:Bo7g050250 transcript:Bo7g050250.1 gene_biotype:protein_coding transcript_biotype:protein_coding	49.5327	25	354	3	1	535	59.4	5.74	High	High	High	High	High	High	High	High	High	High	High	High	3.292	823.92	25	1.87377e+08	1.92062e+08	7.91983e+07	1.52273e+08	1.55023e+08	1.24125e+08	1.46269e+08	1.6472e+08	1.49286e+08	1.62879e+08	2.38021e+08	1.79653e+08	1.52879e+08	1	1.43807e+08	1	1.53425e+08	1	1.93518e+08	1	1.06309	0.823777	0.792821	0.162887
Bo7g003570.1	Succinate--CoA ligase [ADP-forming] subunit beta, mitochondrial	pep chromosome:v2.1:C7:488441:490832:-1 gene:Bo7g003570 transcript:Bo7g003570.1 gene_biotype:protein_coding transcript_biotype:protein_coding description:Succinate--CoA ligase [ADP-forming] subunit beta, mitochondrial :UniProtKB/TrEMBL;Acc:A0A0D3D2A0]	64.133	27	332	6	1	421	45.2	6.8	High	High	High	High	High	High	High	High	High	High	High	High	6.079	823.73	27	9.94671e+07	9.66166e+07	6.21355e+07	1.21047e+08	1.55259e+08	1.61647e+08	1.15981e+08	1.21561e+08	1.32316e+08	1.36611e+08	1.18457e+08	1.2096e+08	8.60731e+07	1	1.45984e+08	1	1.23286e+08	1	1.25343e+08	1	0.589606	0.026223	0.983593	0.795738
Bo5g123220.1	mtLPD2 description	pep chromosome:v2.1:C5:37639659:37641940:1 gene:Bo5g123220 transcript:Bo5g123220.1 gene_biotype:protein_coding transcript_biotype:protein_coding gene_symbol:mtLPD2 description:lipoamide dehydrogenase 2 :TAIR;Acc:AT3G17240](projected from arabidopsis_thaliana,AT3G17240)	47.8261	23	353	13	1	506	53.8	7.39	High	High	High	High	High	High	High	High	High	High	High	High	4.259	823.53	23	1.55759e+08	1.56167e+08	1.56367e+08	2.10961e+08	1.89862e+08	1.8438e+08	1.80021e+08	1.76571e+08	1.84168e+08	1.34098e+08	1.38822e+08	1.14811e+08	1.56098e+08	1	1.95068e+08	1	1.80253e+08	1	1.29243e+08	1	0.800224	0.00859598	1.39468	0.00264812
Bo2g018340.1	Tubulin alpha chain	pep chromosome:v2.1:C2:5353850:5355521:-1 gene:Bo2g018340 transcript:Bo2g018340.1 gene_biotype:protein_coding transcript_biotype:protein_coding description:Tubulin alpha chain :UniProtKB/TrEMBL;Acc:A0A0D3AK04]	40.8889	16	332	1	1	450	49.6	5.1	Not Found	Not Found	Not Found	Not Found	Not Found	Not Found	Not Found	Not Found	Not Found	High	Not Found	Not Found	8.152	823.38	16	NA	NA	NA	NA	NA	NA	NA	NA	NA	5.47723e+06	NA	NA	NA	0	NA	0	NA	0	5.47723e+06	0.333333	NA	NA	NA	NA
Bo9g150400.1		pep chromosome:v2.1:C9:44849140:44851833:1 gene:Bo9g150400 transcript:Bo9g150400.1 gene_biotype:protein_coding transcript_biotype:protein_coding	55.9772	28	328	3	1	527	57.3	5.78	High	High	High	High	High	High	High	High	High	High	High	High	5.434	822.85	28	1.81906e+08	1.72339e+08	1.8262e+08	1.48908e+08	2.67744e+08	1.54658e+08	1.58314e+08	1.61552e+08	1.89884e+08	1.54152e+08	1.3739e+08	1.41352e+08	1.78955e+08	1	1.90437e+08	1	1.69917e+08	1	1.44298e+08	1	0.939709	0.782188	1.17754	0.0846804
Bo1g090470.1	Pyruvate dehydrogenase E1 component subunit alpha	pep chromosome:v2.1:C1:26873212:26875697:1 gene:Bo1g090470 transcript:Bo1g090470.1 gene_biotype:protein_coding transcript_biotype:protein_coding description:Pyruvate dehydrogenase E1 component subunit alpha :UniProtKB/TrEMBL;Acc:A0A0D3AA76]	46.7866	22	349	9	1	389	42.9	7.69	High	High	High	High	High	High	High	High	High	High	High	High	10.721	821.82	22	2.37275e+08	2.15512e+08	2.96577e+08	2.64626e+08	2.88689e+08	3.20151e+08	2.66597e+08	2.06622e+08	2.09376e+08	3.47272e+08	3.39222e+08	2.41787e+08	2.49788e+08	1	2.91155e+08	1	2.27532e+08	1	3.09427e+08	1	0.85792	0.227844	0.735332	0.104502
Bo2g032750.1	Calcium-transporting ATPase	pep chromosome:v2.1:C2:9503013:9509855:1 gene:Bo2g032750 transcript:Bo2g032750.1 gene_biotype:protein_coding transcript_biotype:protein_coding description:Calcium-transporting ATPase :UniProtKB/TrEMBL;Acc:A0A0D3ALK4]	31.0924	32	328	17	1	1071	115.8	7.77	High	High	High	High	High	High	High	High	High	High	High	High	2.07	818.3	32	1.00978e+08	1.24651e+08	1.03372e+08	9.52433e+07	9.18768e+07	8.71168e+07	7.24399e+07	6.90855e+07	6.33597e+07	6.27017e+07	1.38226e+08	1.43574e+08	1.09667e+08	1	9.14123e+07	1	6.8295e+07	1	1.14834e+08	1	1.19969	0.0815616	0.594728	0.150879
Bo6g123660.1	Proteasome subunit alpha type	pep chromosome:v2.1:C6:39257005:39258808:-1 gene:Bo6g123660 transcript:Bo6g123660.1 gene_biotype:protein_coding transcript_biotype:protein_coding description:Proteasome subunit alpha type :UniProtKB/TrEMBL;Acc:A0A0D3D1S2]	58.7234	12	247	5	1	235	25.6	5.49	High	High	High	High	High	High	High	High	High	High	High	High	9	817.42	12	1.94639e+08	1.7126e+08	1.63689e+08	1.90073e+08	1.59682e+08	1.46864e+08	1.78018e+08	1.45833e+08	2.54313e+08	1.84103e+08	1.93157e+08	1.96309e+08	1.76529e+08	1	1.6554e+08	1	1.92721e+08	1	1.9119e+08	1	1.06639	0.526014	1.00801	0.964537
Bo3g179440.1		pep chromosome:v2.1:C3:62280679:62284537:1 gene:Bo3g179440 transcript:Bo3g179440.1 gene_biotype:protein_coding transcript_biotype:protein_coding	36.7606	24	334	12	1	710	80.5	5.92	High	High	High	High	High	High	High	High	High	High	High	High	2.346	817.26	24	1.99284e+08	1.81981e+08	6.52985e+08	1.54078e+08	1.44679e+08	1.48849e+08	5.31977e+08	5.23205e+08	8.58236e+07	8.68759e+07	9.44032e+07	8.23621e+07	3.4475e+08	1	1.49202e+08	1	3.80335e+08	1	8.78804e+07	1	2.31062	0.273592	4.32787	0.1181
Bo3g143770.1		pep chromosome:v2.1:C3:51911248:51912507:1 gene:Bo3g143770 transcript:Bo3g143770.1 gene_biotype:protein_coding transcript_biotype:protein_coding	55.3699	23	329	4	1	419	46.6	6.47	High	High	High	High	High	High	High	High	High	High	High	High	5.661	817.11	23	4.79535e+07	4.87856e+07	7.04257e+07	8.60666e+07	6.55415e+07	5.92149e+07	8.77994e+07	9.38866e+07	9.36065e+07	8.4447e+07	1.21445e+08	7.67284e+07	5.57216e+07	1	7.02743e+07	1	9.17642e+07	1	9.42067e+07	1	0.792915	0.254403	0.974073	0.869438
Bo4g069220.1	Histone H2B	pep chromosome:v2.1:C4:14622358:14622804:-1 gene:Bo4g069220 transcript:Bo4g069220.1 gene_biotype:protein_coding transcript_biotype:protein_coding description:Histone H2B :UniProtKB/TrEMBL;Acc:A0A0D3BU25]	58.7838	10	278	2	1	148	16.2	10.02	High	High	High	High	High	High	High	High	High	High	High	High	9	816.91	10	4.44013e+08	3.9649e+08	4.72941e+08	4.55194e+08	2.36403e+08	5.43843e+08	3.76199e+08	3.72027e+08	423521304	3.01199e+08	5.51479e+08	4.61963e+08	4.37815e+08	1	4.11814e+08	1	3.90582e+08	1	4.38214e+08	1	1.06314	0.795873	0.891306	0.560176
Bo3g107500.1	aldehyde dehydrogenase 12A1	pep chromosome:v2.1:C3:37965242:37968398:1 gene:Bo3g107500 transcript:Bo3g107500.1 gene_biotype:protein_coding transcript_biotype:protein_coding description:aldehyde dehydrogenase 12A1 :Projected from Arabidopsis thaliana (AT5G62530) TAIR;Acc:AT5G62530]	39.3178	22	332	22	1	557	61.8	6.92	High	High	High	High	High	High	High	High	High	High	High	High	3.903	816.17	22	3.66697e+08	3.62897e+08	3.36212e+08	3.94218e+08	3.82822e+08	3.90447e+08	2.94001e+08	2.8235e+08	2.7973e+08	2.96846e+08	2.85898e+08	3.02045e+08	3.55269e+08	1	3.89162e+08	1	2.8536e+08	1	2.9493e+08	1	0.912907	0.0289446	0.967553	0.213295
Bo4g194830.1		pep chromosome:v2.1:C4:52536885:52538404:-1 gene:Bo4g194830 transcript:Bo4g194830.1 gene_biotype:protein_coding transcript_biotype:protein_coding	50.1832	18	375	1	1	273	31.6	9.95	High	High	High	High	High	High	High	High	High	High	High	High	5.529	814.85	18	9.81303e+07	1.08934e+08	1.03365e+08	8.59544e+07	8.37654e+07	9.2326e+07	9.69635e+07	8.90331e+07	7.93805e+07	7.70145e+07	7.79531e+07	8.15838e+07	1.03477e+08	1	8.73486e+07	1	8.8459e+07	1	7.88505e+07	1	1.18464	0.0162389	1.12186	0.142416
Bo8g097800.1		pep chromosome:v2.1:C8:33379727:33386700:-1 gene:Bo8g097800 transcript:Bo8g097800.1 gene_biotype:protein_coding transcript_biotype:protein_coding	27.4018	26	291	26	1	1197	129.5	6.32	High	High	High	High	High	High	High	High	High	High	High	High	1.379	814.23	26	3.28959e+08	3.17072e+08	1.39682e+09	1.55345e+09	1.51452e+08	1.50873e+09	1.36038e+09	2.92088e+08	2.9692e+08	3.48966e+08	1.49813e+08	1.42176e+08	6.8095e+08	1	1.07121e+09	1	6.49795e+08	1	2.13652e+08	1	0.635682	0.539836	3.04138	0.294318
Bo8g106490.1		pep chromosome:v2.1:C8:37651725:37659377:1 gene:Bo8g106490 transcript:Bo8g106490.1 gene_biotype:protein_coding transcript_biotype:protein_coding	28.5714	33	331	4	1	1260	140.9	8.97	High	High	High	High	High	High	High	High	High	High	High	High	1.195	812.83	33	1.23012e+08	1.27721e+08	5.2665e+07	1.14979e+08	9.85218e+07	4.75946e+07	9.5615e+07	1.26117e+08	1.51939e+08	7.67016e+07	9.30043e+07	7.52033e+07	1.01132e+08	1	8.70317e+07	1	1.24557e+08	1	8.16364e+07	1	1.16202	0.678814	1.52575	0.0675902
Bo9g021750.1	Dolichyl-diphosphooligosaccharide--protein glycosyltransferase 48 kDa subunit	pep chromosome:v2.1:C9:6555896:6558527:1 gene:Bo9g021750 transcript:Bo9g021750.1 gene_biotype:protein_coding transcript_biotype:protein_coding description:Dolichyl-diphosphooligosaccharide--protein glycosyltransferase 48 kDa subunit :UniProtKB/TrEMBL;Acc:A0A0D3E2M6]	44.1379	18	334	4	1	435	48.5	6.48	High	High	High	High	High	High	High	High	High	High	High	High	3.354	811.92	18	2.04102e+08	2.05658e+08	2.39513e+08	2.27711e+08	3.7555e+08	2.34477e+08	4.54569e+08	4.61215e+08	2.83214e+08	3.96077e+08	3.30375e+08	3.29162e+08	2.16424e+08	1	2.79246e+08	1	3.99666e+08	1	3.51871e+08	1	0.77503	0.273685	1.13583	0.485828
Bo5g061060.1		pep chromosome:v2.1:C5:19038856:19041704:-1 gene:Bo5g061060 transcript:Bo5g061060.1 gene_biotype:protein_coding transcript_biotype:protein_coding	38.5507	28	394	4	1	690	77.2	6.4	High	High	High	High	High	High	High	High	High	High	High	High	2.162	810.39	28	4.00475e+08	4.41e+08	3.29442e+07	1.38483e+08	1.42525e+08	1.35962e+08	1.18849e+08	1.48879e+08	1.28176e+08	1.19344e+08	3.77036e+08	1.13681e+08	2.91473e+08	1	1.3899e+08	1	1.31968e+08	1	2.03354e+08	1	2.09708	0.305275	0.648959	0.459477
Bo9g149730.1		pep chromosome:v2.1:C9:44366603:44368543:1 gene:Bo9g149730 transcript:Bo9g149730.1 gene_biotype:protein_coding transcript_biotype:protein_coding	34.6895	17	317	3	1	467	51.9	7.15	High	High	High	High	High	High	High	High	High	High	High	High	2.849	809.61	17	1.5068e+08	2.1299e+08	1.39549e+08	1.44907e+08	1.78384e+08	1.2277e+08	1.17096e+08	1.65183e+08	3.27712e+08	1.77188e+08	1.6262e+08	1.55836e+08	1.6774e+08	1	1.48687e+08	1	2.03331e+08	1	1.65215e+08	1	1.12814	0.533454	1.23071	0.583709
Bo3g065830.1	Acetyltransferase component of pyruvate dehydrogenase complex	pep chromosome:v2.1:C3:25554714:25558643:1 gene:Bo3g065830 transcript:Bo3g065830.1 gene_biotype:protein_coding transcript_biotype:protein_coding description:Acetyltransferase component of pyruvate dehydrogenase complex :UniProtKB/TrEMBL;Acc:A0A0D3BB71]	29.2254	16	270	3	1	568	61.9	8.48	High	High	Not Found	High	High	High	High	High	High	High	High	High	1.929	808.8	16	8.16426e+07	4.18134e+07	NA	8.47228e+07	5.28865e+07	4.71234e+07	9.52256e+07	9.33565e+07	5.04062e+07	1.15153e+08	4.71423e+07	1.02546e+08	6.1728e+07	0.666667	6.15776e+07	1	7.96628e+07	1	8.82804e+07	1	1.00244	0.994777	0.902384	0.752462
Bo5g122570.1	Glutamine synthetase	pep chromosome:v2.1:C5:37218661:37220388:-1 gene:Bo5g122570 transcript:Bo5g122570.1 gene_biotype:protein_coding transcript_biotype:protein_coding description:Glutamine synthetase :UniProtKB/TrEMBL;Acc:A0A0D3CJ64]	37.2881	13	281	1	1	354	38.5	6.33	Not Found	High	High	High	High	Not Found	High	High	High	High	High	High	4.754	808.7	13	NA	8.08444e+07	7.18514e+07	8.14184e+07	8.22012e+07	NA	7.43164e+07	7.80282e+07	75679439	6.19496e+07	6.89483e+07	6.66874e+07	7.63479e+07	0.666667	8.18098e+07	0.666667	7.6008e+07	1	6.58618e+07	1	0.933237	0.349847	1.15405	0.012107
Bo8g112290.1	BON3 description	pep chromosome:v2.1:C8:39740707:39744609:-1 gene:Bo8g112290 transcript:Bo8g112290.1 gene_biotype:protein_coding transcript_biotype:protein_coding gene_symbol:BON3 description:Calcium-dependent phospholipid-binding Copine family protein :TAIR;Acc:AT1G08860](projected from arabidopsis_thaliana,AT1G08860)	36.3167	16	288	16	1	581	63.9	5.87	High	High	High	High	High	High	High	High	High	High	High	High	2.472	808.11	16	2.33044e+08	2.32127e+08	2.38175e+08	2.85636e+08	2.7914e+08	2.74356e+08	2.3694e+08	2.43306e+08	2.32001e+08	2.37962e+08	2.09192e+08	2.09484e+08	2.34448e+08	1	2.79711e+08	1	2.37416e+08	1	2.18879e+08	1	0.838182	0.000276362	1.08469	0.139981
Bo1g116310.1		pep chromosome:v2.1:C1:35115303:35115868:-1 gene:Bo1g116310 transcript:Bo1g116310.1 gene_biotype:protein_coding transcript_biotype:protein_coding	38.3117	5	258	5	1	154	17.1	10.08	High	High	High	High	High	High	High	High	High	High	High	High	4.179	806.44	5	1.19991e+09	1.25782e+09	1.24827e+09	1.09225e+09	1.10154e+09	1.02686e+09	1.00412e+09	9.75385e+08	1006570689	1.11751e+09	1.15351e+09	1.18388e+09	1.23533e+09	1	1.07355e+09	1	9.95357e+08	1	1.15163e+09	1	1.1507	0.00541968	0.864301	0.00194991
Bo2g011290.1		pep chromosome:v2.1:C2:3007413:3008661:-1 gene:Bo2g011290 transcript:Bo2g011290.1 gene_biotype:protein_coding transcript_biotype:protein_coding	48.5477	14	328	2	1	241	26.6	8.5	Not Found	High	High	High	High	High	High	High	High	High	High	High	5.7	805.05	14	NA	6.39033e+07	1.0848e+08	1.1639e+08	9.88542e+07	1.08921e+08	1.13767e+08	1.13776e+08	1.09352e+08	6.29264e+07	6.18484e+07	6.61527e+07	8.61918e+07	0.666667	1.08055e+08	1	1.12298e+08	1	6.36425e+07	1	0.797666	0.308282	1.76452	1.5639e-05
Bo8g070010.1		pep chromosome:v2.1:C8:22817954:22820401:1 gene:Bo8g070010 transcript:Bo8g070010.1 gene_biotype:protein_coding transcript_biotype:protein_coding	21.7703	8	276	8	1	418	45.8	8.32	High	High	High	High	High	High	High	High	High	High	High	High	4.012	804.31	8	2.09528e+09	1.93531e+09	1.99718e+09	1.18682e+09	1.12749e+09	1.09235e+09	1.15002e+09	1.18441e+09	1145303734	1.6799e+09	1.53858e+09	1.63138e+09	2.00926e+09	1	1.13555e+09	1	1.15991e+09	1	1.61662e+09	1	1.76941	8.61213e-05	0.717491	0.000454944
Bo3g002980.1	Pentatricopeptide repeat (PPR) superfamily protein	pep chromosome:v2.1:C3:955277:958095:1 gene:Bo3g002980 transcript:Bo3g002980.1 gene_biotype:protein_coding transcript_biotype:protein_coding description:Pentatricopeptide repeat (PPR) superfamily protein :TAIR;Acc:AT5G04780](projected from arabidopsis_thaliana,AT5G04780)	10.3896	10	326	1	1	770	87.5	8.24	Not Found	Not Found	Not Found	High	Not Found	Not Found	Not Found	Not Found	Not Found	Not Found	Not Found	Not Found	1.417	802.58	10	NA	NA	NA	NA	NA	NA	NA	NA	NA	NA	NA	NA	NA	0	NA	0	NA	0	NA	0	NA	NA	NA	NA
Bo3g140200.1		pep chromosome:v2.1:C3:50841646:50845137:1 gene:Bo3g140200 transcript:Bo3g140200.1 gene_biotype:protein_coding transcript_biotype:protein_coding	47.1028	25	344	1	1	535	59.3	5.57	High	High	Not Found	Not Found	Not Found	Not Found	Not Found	Not Found	Not Found	Not Found	Not Found	High	3.365	801.32	25	1.70955e+07	1.73861e+07	NA	NA	NA	NA	NA	NA	NA	NA	NA	1.69849e+07	1.72408e+07	0.666667	NA	0	NA	0	1.69849e+07	0.333333	NA	NA	NA	NA
Bo3g045300.1	Eukaryotic translation initiation factor 3 subunit A	pep chromosome:v2.1:C3:18986855:18990711:-1 gene:Bo3g045300 transcript:Bo3g045300.1 gene_biotype:protein_coding transcript_biotype:protein_coding description:Eukaryotic translation initiation factor 3 subunit A :UniProtKB/TrEMBL;Acc:A0A0D3B858]	32.212	31	336	1	1	981	113.8	9.14	High	High	Not Found	Not Found	Not Found	Not Found	High	High	High	High	High	Not Found	1.692	800.63	31	3.25401e+07	3.41824e+07	NA	NA	NA	NA	3.33908e+07	2.73868e+07	3.07097e+07	1.96607e+07	1.83724e+07	NA	3.33612e+07	0.666667	NA	0	3.04958e+07	1	1.90166e+07	0.666667	NA	NA	1.60364	0.0153337
Bo7g109800.1		pep chromosome:v2.1:C7:43496952:43499520:-1 gene:Bo7g109800 transcript:Bo7g109800.1 gene_biotype:protein_coding transcript_biotype:protein_coding	43.2596	22	319	3	1	497	54.1	6.58	High	High	High	High	High	High	High	High	High	High	High	High	3.024	800.51	22	1.07476e+08	1.18976e+08	1.16663e+08	1.18291e+08	1.17072e+08	1.26047e+08	9.76414e+07	3.15212e+07	6.10621e+07	7.21328e+07	1.07982e+08	1.05209e+08	1.14371e+08	1	1.2047e+08	1	6.34082e+07	1	9.5108e+07	1	0.949379	0.246674	0.666697	0.228612
Bo3g084070.1		pep chromosome:v2.1:C3:31356493:31358165:-1 gene:Bo3g084070 transcript:Bo3g084070.1 gene_biotype:protein_coding transcript_biotype:protein_coding	33.8509	15	320	5	1	322	36.9	9.28	High	High	High	High	High	High	High	High	High	High	High	High	4.52	798.88	15	2.18771e+08	2.4548e+08	2.55895e+08	3.08168e+08	3.1332e+08	3.03552e+08	2.57454e+08	2.68006e+08	2.42635e+08	2.96702e+08	2.85467e+08	2.59047e+08	2.40049e+08	1	3.08347e+08	1	2.56032e+08	1	2.80405e+08	1	0.778502	0.00391623	0.913077	0.142334
Bo9g007590.1	Protein STABILIZED1	pep chromosome:v2.1:C9:1598911:1601955:-1 gene:Bo9g007590 transcript:Bo9g007590.1 gene_biotype:protein_coding transcript_biotype:protein_coding description:Protein STABILIZED1 :Projected from Arabidopsis thaliana (AT4G03430) UniProtKB/Swiss-Prot;Acc:Q9ZT71]	36.1933	38	348	38	1	1014	113.9	7.47	High	High	High	High	High	High	High	High	High	High	High	High	1.905	798.22	38	1.25224e+08	1.22958e+08	1.14262e+08	1.51501e+08	1.49795e+08	1.36582e+08	1.7223e+08	1.30283e+08	1.41968e+08	1.41372e+08	1.30532e+08	1.38433e+08	1.20815e+08	1	1.45959e+08	1	1.4816e+08	1	1.36779e+08	1	0.827729	0.012143	1.08321	0.427825
Bo4g078560.1		pep chromosome:v2.1:C4:17910237:17912896:1 gene:Bo4g078560 transcript:Bo4g078560.1 gene_biotype:protein_coding transcript_biotype:protein_coding	58.1864	22	317	22	1	397	45.1	5.12	High	High	High	High	High	High	High	High	High	High	High	High	9	794.54	22	2.47517e+08	2.28931e+08	2.46901e+08	2.65107e+08	2.80043e+08	2.64162e+08	2.86847e+08	2.90632e+08	2.98792e+08	3.09555e+08	3.07273e+08	3.07056e+08	2.41117e+08	1	2.69771e+08	1	2.9209e+08	1	3.07962e+08	1	0.893782	0.022903	0.948464	0.011769
Bo7g054140.1		pep chromosome:v2.1:C7:19510951:19520141:1 gene:Bo7g054140 transcript:Bo7g054140.1 gene_biotype:protein_coding transcript_biotype:protein_coding	13.0588	11	270	11	1	850	94	6.61	High	High	High	High	High	High	High	High	High	High	High	High	0.826	794.21	11	1.7034e+09	1.66571e+09	1.67734e+09	2.30446e+09	2.21937e+09	2.08549e+09	2.09767e+09	1.62862e+09	1581121542	1.64143e+09	1.62071e+09	1.71273e+09	1.68215e+09	1	2.20311e+09	1	1.76914e+09	1	1.65829e+09	1	0.763536	0.00129153	1.06684	0.543563
Bo9g126230.1		pep chromosome:v2.1:C9:39685981:39688215:1 gene:Bo9g126230 transcript:Bo9g126230.1 gene_biotype:protein_coding transcript_biotype:protein_coding	35.3043	19	315	8	1	575	63.5	5.22	High	High	High	High	High	High	High	High	High	High	High	High	2.615	793.91	19	1.66427e+08	1.65618e+08	1.5308e+08	2.27449e+08	2.25266e+08	2.26574e+08	1.93528e+08	1.99421e+08	1.99877e+08	1.82998e+08	1.79974e+08	1.75443e+08	1.61708e+08	1	2.2643e+08	1	1.97608e+08	1	1.79472e+08	1	0.714166	0.000120661	1.10106	0.00377602
Bo6g079650.1		pep chromosome:v2.1:C6:23881151:23884191:-1 gene:Bo6g079650 transcript:Bo6g079650.1 gene_biotype:protein_coding transcript_biotype:protein_coding	30.7107	15	339	4	1	394	45.2	9.85	High	High	High	High	High	High	High	High	High	High	High	High	3.084	793.22	15	5.28973e+08	4.81079e+08	5.08645e+08	5.29318e+08	4.83894e+08	4.20769e+08	5.76103e+08	5.77509e+08	5.5629e+08	5.84553e+08	5.47073e+08	6.59203e+08	5.06232e+08	1	4.77994e+08	1	5.69968e+08	1	5.96943e+08	1	1.05908	0.457785	0.954811	0.467813
Bo4g078740.1	Proteasome subunit alpha type	pep chromosome:v2.1:C4:18159770:18161094:1 gene:Bo4g078740 transcript:Bo4g078740.1 gene_biotype:protein_coding transcript_biotype:protein_coding description:Proteasome subunit alpha type :UniProtKB/TrEMBL;Acc:A0A0D3BUT4]	54.2435	13	259	4	1	271	29.7	5.19	High	High	High	High	High	High	High	High	High	High	High	High	9	791.86	13	6.99013e+07	7.21023e+07	6.28902e+07	8.51778e+07	9.55557e+07	1.01693e+08	3.91444e+07	1.10467e+07	4.41463e+07	1.01249e+08	8.99413e+07	8.67059e+07	6.82979e+07	1	9.41423e+07	1	3.14458e+07	1	9.26321e+07	1	0.725476	0.0096908	0.33947	0.0054679
Bo8g050080.1		pep chromosome:v2.1:C8:16419356:16422844:-1 gene:Bo8g050080 transcript:Bo8g050080.1 gene_biotype:protein_coding transcript_biotype:protein_coding	18.0025	17	365	1	1	811	93	5.4	High	High	High	High	High	Not Found	Not Found	Not Found	Not Found	Not Found	Not Found	Not Found	1.046	790.64	17	6.58649e+07	6.65485e+07	3.01087e+07	NA	4.72064e+07	NA	NA	NA	NA	NA	NA	NA	5.4174e+07	1	4.72064e+07	0.333333	NA	0	NA	0	1.1476	NA	NA	NA
Bo1g039350.1	26S proteasome non-ATPase regulatory subunit 6 homolog	pep chromosome:v2.1:C1:11944298:11946502:-1 gene:Bo1g039350 transcript:Bo1g039350.1 gene_biotype:protein_coding transcript_biotype:protein_coding description:26S proteasome non-ATPase regulatory subunit 6 homolog :Projected from Arabidopsis thaliana (AT4G24820) UniProtKB/Swiss-Prot;Acc:Q93Y35]	43.1525	16	271	3	1	387	44.2	5.57	High	High	High	High	High	High	High	High	High	High	High	High	3.642	790.32	16	1.27146e+08	1.12791e+08	1.15467e+08	1.2456e+08	1.438e+08	1.46718e+08	1.12404e+08	1.02952e+08	146767368	1.17981e+08	1.17851e+08	9.8215e+07	1.18468e+08	1	1.3836e+08	1	1.20708e+08	1	1.11349e+08	1	0.856234	0.0730078	1.08405	0.562605
Bo3g017230.1		pep chromosome:v2.1:C3:5612668:5615246:1 gene:Bo3g017230 transcript:Bo3g017230.1 gene_biotype:protein_coding transcript_biotype:protein_coding	31.5956	20	337	2	1	633	71.1	6.58	High	High	High	High	High	High	High	High	High	High	High	High	2.234	789.44	20	1.10388e+08	1.14783e+08	1.14425e+08	1.10374e+08	1.17507e+08	1.11419e+08	1.45315e+08	1.37144e+08	1.30746e+08	1.1689e+08	1.13856e+08	1.18525e+08	1.13199e+08	1	1.131e+08	1	1.37735e+08	1	1.16424e+08	1	1.00087	0.971885	1.18305	0.00859663
Bo9g005920.1		pep chromosome:v2.1:C9:1180070:1183953:1 gene:Bo9g005920 transcript:Bo9g005920.1 gene_biotype:protein_coding transcript_biotype:protein_coding	44.4444	33	330	6	1	738	86.2	7.06	High	High	High	High	High	High	High	High	High	High	High	High	4.677	787.69	33	5.72809e+07	3.50539e+07	6.90371e+07	3.94539e+07	6.34707e+07	6.03942e+07	4.19822e+07	6.33804e+07	6.25096e+07	3.27537e+07	3.35744e+07	3.78851e+07	5.37906e+07	1	5.44396e+07	1	5.59574e+07	1	3.47377e+07	1	0.988079	0.961078	1.61085	0.0415907
Bo3g027550.1	Apoptosis inhibitory protein 5 (API5)	pep chromosome:v2.1:C3:10360769:10365482:-1 gene:Bo3g027550 transcript:Bo3g027550.1 gene_biotype:protein_coding transcript_biotype:protein_coding description:Apoptosis inhibitory protein 5 (API5) :Projected from Arabidopsis thaliana (AT2G34040) TAIR;Acc:AT2G34040]	35.6322	20	280	20	1	609	67.7	8.56	High	High	High	High	High	High	High	High	High	High	High	High	1.859	787.34	20	1.81089e+08	1.75939e+08	1.71581e+08	2.53328e+08	2.33221e+08	2.34302e+08	2.16505e+08	2.2121e+08	2.37012e+08	1.53818e+08	1.63186e+08	1.49508e+08	1.76203e+08	1	2.40284e+08	1	2.24909e+08	1	1.55504e+08	1	0.733311	0.000827636	1.44633	0.00072012
Bo5g051850.1		pep chromosome:v2.1:C5:17083969:17087000:-1 gene:Bo5g051850 transcript:Bo5g051850.1 gene_biotype:protein_coding transcript_biotype:protein_coding	50.1587	13	293	4	1	315	33.1	9.44	High	High	High	High	High	High	High	High	High	High	High	High	3.924	784.69	13	1.38893e+08	1.30836e+08	1.34026e+08	1.1976e+08	1.19681e+08	1.155e+08	1.15869e+08	1.17512e+08	1.13496e+08	1.46076e+08	1.34234e+08	1.33661e+08	1.34585e+08	1	1.18313e+08	1	1.15625e+08	1	1.37991e+08	1	1.13753	0.00399247	0.837922	0.00604033
Bo3g024070.1		pep chromosome:v2.1:C3:8886659:8889467:-1 gene:Bo3g024070 transcript:Bo3g024070.1 gene_biotype:protein_coding transcript_biotype:protein_coding	42.2343	12	264	3	1	367	39.5	5.83	High	High	High	High	High	High	High	High	High	High	High	High	3.365	784.21	12	1.76825e+08	1.57587e+08	1.59443e+08	1.32767e+08	1.37129e+08	1.38268e+08	1.31866e+08	1.80999e+08	1.90671e+08	1.19699e+08	1.15357e+08	7.71604e+07	1.64618e+08	1	1.36055e+08	1	1.67845e+08	1	1.04072e+08	1	1.20994	0.0108484	1.61277	0.048183
Bo6g026470.1		pep chromosome:v2.1:C6:6025027:6028585:-1 gene:Bo6g026470 transcript:Bo6g026470.1 gene_biotype:protein_coding transcript_biotype:protein_coding	38.918	19	336	4	1	573	61.9	6.43	High	High	High	High	High	High	High	High	High	High	High	High	2.728	783.54	19	1.3363e+08	1.32866e+08	1.3907e+08	1.98686e+08	1.06556e+08	1.6406e+08	1.34093e+08	1.16822e+08	1.6273e+08	1.77038e+08	1.69828e+08	1.78832e+08	1.35189e+08	1	1.56434e+08	1	1.37882e+08	1	1.75233e+08	1	0.864193	0.474431	0.78685	0.0522853
Bo9g124820.1	Pyruvate kinase	pep chromosome:v2.1:C9:39368445:39371227:-1 gene:Bo9g124820 transcript:Bo9g124820.1 gene_biotype:protein_coding transcript_biotype:protein_coding description:Pyruvate kinase :UniProtKB/TrEMBL;Acc:A0A0D3EBQ5]	48.996	22	324	3	1	498	54.3	6.79	High	High	High	High	High	High	High	High	High	High	High	High	3.819	780.88	22	1.14718e+08	1.07349e+08	1.20783e+08	1.17956e+08	1.4089e+08	1.45849e+08	1.07588e+08	2.15433e+08	1.55188e+08	1.28014e+08	1.17532e+08	1.21637e+08	1.14283e+08	1	1.34899e+08	1	1.59403e+08	1	1.22394e+08	1	0.847179	0.0940581	1.30237	0.303236
Bo3g055370.1		pep chromosome:v2.1:C3:21884563:21888286:-1 gene:Bo3g055370 transcript:Bo3g055370.1 gene_biotype:protein_coding transcript_biotype:protein_coding	15.8703	10	344	1	1	586	66.1	8.73	High	High	High	High	High	High	High	High	High	High	High	High	1.223	780.58	10	1.28245e+09	1.38291e+09	1.49945e+09	8.97091e+08	1.05849e+09	1.07899e+09	1.26953e+09	1.52591e+09	1666682486	1.39383e+09	1.41778e+09	1.5636e+09	1.38827e+09	1	1.01152e+09	1	1.48737e+09	1	1.45841e+09	1	1.37246	0.0114415	1.01986	0.831787
Bo2g013910.1	NADH-cytochrome b5 reductase	pep chromosome:v2.1:C2:4445988:4447972:-1 gene:Bo2g013910 transcript:Bo2g013910.1 gene_biotype:protein_coding transcript_biotype:protein_coding description:NADH-cytochrome b5 reductase :UniProtKB/TrEMBL;Acc:A0A0D3AJK8]	59.7865	13	249	3	1	281	31.4	8.38	High	High	High	High	High	High	High	High	High	High	High	High	10.22	776.91	13	9.23692e+07	9.40888e+07	9.61383e+07	8.91002e+07	9.25074e+07	8.49512e+07	7.93256e+07	9.60368e+07	105012176	9.18763e+07	9.36585e+07	1.02814e+08	9.41988e+07	1	8.88529e+07	1	9.34582e+07	1	9.61165e+07	1	1.06017	0.0937231	0.972344	0.763537
Bo3g026790.1		pep chromosome:v2.1:C3:9911260:9916045:1 gene:Bo3g026790 transcript:Bo3g026790.1 gene_biotype:protein_coding transcript_biotype:protein_coding	25.2252	20	255	3	1	999	108.3	5.35	High	High	High	High	High	High	High	High	High	High	High	High	1.771	775.74	20	6.96137e+07	4.06182e+07	7.87016e+07	9.59291e+07	1.05684e+08	1.05577e+08	1.00212e+08	1.09491e+08	1.17366e+08	1.05457e+08	8.35193e+07	1.21889e+08	6.29778e+07	1	1.02397e+08	1	1.09023e+08	1	1.03622e+08	1	0.615037	0.0298175	1.05212	0.680143
Bo5g043850.1		pep chromosome:v2.1:C5:14983047:14986056:1 gene:Bo5g043850 transcript:Bo5g043850.1 gene_biotype:protein_coding transcript_biotype:protein_coding	40.6897	23	317	1	1	580	64.5	6.23	Not Found	Not Found	Not Found	Not Found	Not Found	Not Found	High	High	High	Not Found	Not Found	Not Found	2.525	772.55	23	NA	NA	NA	NA	NA	NA	1.42115e+08	1.38287e+08	1.49071e+08	NA	NA	NA	NA	0	NA	0	1.43158e+08	1	NA	0	NA	NA	NA	NA
Bo7g104210.1		pep chromosome:v2.1:C7:40045871:40048717:-1 gene:Bo7g104210 transcript:Bo7g104210.1 gene_biotype:protein_coding transcript_biotype:protein_coding	35.3434	16	278	5	1	597	65.9	5.43	High	High	High	High	High	High	High	High	High	High	High	High	4.08	770.97	16	7.21316e+07	8.18492e+07	8.90409e+07	9.43473e+07	1.02603e+08	5.88597e+07	7.38272e+07	8.67054e+07	7.3694e+07	6.8753e+07	9.75233e+07	7.57561e+07	8.10072e+07	1	8.527e+07	1	7.80755e+07	1	8.06774e+07	1	0.950008	0.780247	0.967749	0.801332
Bo9g010880.1		pep chromosome:v2.1:C9:3364965:3368232:-1 gene:Bo9g010880 transcript:Bo9g010880.1 gene_biotype:protein_coding transcript_biotype:protein_coding	34.9931	27	330	7	1	723	81.6	7.96	High	High	High	High	High	High	High	High	High	High	High	High	2.286	769.66	27	9.80075e+07	9.45836e+07	1.05471e+08	1.18598e+08	1.23331e+08	1.25152e+08	1.01545e+08	1.02166e+08	1.09812e+08	1.13741e+08	1.0588e+08	1.0455e+08	9.9354e+07	1	1.2236e+08	1	1.04507e+08	1	1.08057e+08	1	0.811978	0.00361714	0.967153	0.415368
Bo3g034470.1		pep chromosome:v2.1:C3:13086632:13090439:-1 gene:Bo3g034470 transcript:Bo3g034470.1 gene_biotype:protein_coding transcript_biotype:protein_coding	35.6643	26	261	4	1	715	77.3	5.95	High	High	High	High	High	High	High	High	High	High	High	High	2.875	769.15	26	5.39306e+07	6.33908e+07	5.77478e+07	5.49393e+07	4.08024e+07	5.53778e+07	4.24318e+07	6.29185e+07	6.05942e+07	3.68555e+07	5.55554e+07	5.30714e+07	5.83564e+07	1	5.03731e+07	1	5.53148e+07	1	4.84941e+07	1	1.15848	0.221621	1.14065	0.478577
Bo6g112790.1		pep chromosome:v2.1:C6:35445751:35454632:1 gene:Bo6g112790 transcript:Bo6g112790.1 gene_biotype:protein_coding transcript_biotype:protein_coding	35.5292	42	344	33	1	1351	153.7	5.62	High	High	High	High	High	High	High	High	High	High	High	High	1.894	768.36	42	1.04706e+08	1.26321e+08	9.45686e+07	1.44248e+08	1.49156e+08	9.72551e+07	9.11928e+07	9.69714e+07	9.84456e+07	1.0569e+08	1.07582e+08	1.0816e+08	1.08532e+08	1	1.3022e+08	1	9.55366e+07	1	1.07144e+08	1	0.833451	0.317572	0.891665	0.00765165
Bo5g156300.1		pep chromosome:v2.1:C5:46814834:46816252:-1 gene:Bo5g156300 transcript:Bo5g156300.1 gene_biotype:protein_coding transcript_biotype:protein_coding	56.1594	12	249	4	1	276	29.3	8.66	High	High	High	High	High	High	Not Found	Not Found	Not Found	Not Found	Not Found	Not Found	7.859	768.19	12	2.71059e+08	3.08833e+08	3.05295e+08	3.57385e+08	3.61759e+08	3.89147e+08	NA	NA	NA	NA	NA	NA	2.95062e+08	1	3.6943e+08	1	NA	0	NA	0	0.798695	0.00889077	NA	NA
Bo7g115200.1	Coatomer subunit beta	pep chromosome:v2.1:C7:45869401:45872589:1 gene:Bo7g115200 transcript:Bo7g115200.1 gene_biotype:protein_coding transcript_biotype:protein_coding description:Coatomer subunit beta :UniProtKB/TrEMBL;Acc:A0A0D3DH72]	34.4937	29	352	9	1	948	105.6	5.85	High	High	High	High	High	High	High	High	High	High	High	High	1.659	767.52	29	1.34747e+08	1.49085e+08	1.32043e+08	1.36728e+08	1.41652e+08	1.44338e+08	1.32766e+08	1.30278e+08	1.31743e+08	1.26553e+08	1.20622e+08	1.296e+08	1.38625e+08	1	1.40906e+08	1	1.31596e+08	1	1.25592e+08	1	0.983812	0.711284	1.04781	0.092972
Bo5g156490.1		pep chromosome:v2.1:C5:46885305:46886248:-1 gene:Bo5g156490 transcript:Bo5g156490.1 gene_biotype:protein_coding transcript_biotype:protein_coding	67.1329	11	326	2	1	143	15.8	10.08	High	High	High	High	High	High	High	High	High	High	High	High	12.594	767.2	11	2.04261e+09	2.11883e+09	2.27233e+09	1.54976e+09	1.56614e+09	9.28045e+08	1.99111e+09	1.95961e+09	2038951753	1.85294e+09	1.84958e+09	1.9948e+09	2.14459e+09	1	1.34798e+09	1	1.99655e+09	1	1.89911e+09	1	1.59096	0.0225404	1.05131	0.140523
Bo1g105510.1		pep chromosome:v2.1:C1:32345973:32346885:-1 gene:Bo1g105510 transcript:Bo1g105510.1 gene_biotype:protein_coding transcript_biotype:protein_coding	34.4569	11	313	11	1	267	31	9.17	High	High	High	High	High	High	High	High	High	High	High	High	4.109	766.99	11	2.88609e+09	2.71877e+09	2.76935e+09	1.50194e+09	1.46361e+09	1.42568e+09	2.39999e+09	2.32771e+09	2235409801	3.20457e+09	3.02686e+09	3.02039e+09	2.7914e+09	1	1.46374e+09	1	2.32104e+09	1	3.08394e+09	1	1.90703	1.64977e-05	0.75262	0.000578879
Bo1g006610.1		pep chromosome:v2.1:C1:2028848:2032037:1 gene:Bo1g006610 transcript:Bo1g006610.1 gene_biotype:protein_coding transcript_biotype:protein_coding	27.6442	10	262	1	1	416	45.2	7.4	High	Not Found	High	High	High	High	High	High	High	High	High	High	2.981	765.97	10	1.03411e+08	NA	8.88423e+07	1.17119e+08	1.36337e+08	1.06028e+08	1.6351e+08	1.22794e+08	1.48143e+08	1.49777e+08	1.49871e+08	1.48722e+08	9.61269e+07	0.666667	1.19828e+08	1	1.44816e+08	1	1.49457e+08	1	0.802207	0.157789	0.968946	0.715878
Bo4g131050.1		pep chromosome:v2.1:C4:33964963:33968400:1 gene:Bo4g131050 transcript:Bo4g131050.1 gene_biotype:protein_coding transcript_biotype:protein_coding	38.6588	15	291	3	1	507	54.8	7.4	High	Not Found	Not Found	High	High	High	High	High	High	High	High	High	2.639	765.25	15	1.56408e+07	NA	NA	1.78081e+08	1.25545e+07	1.11089e+08	7.63588e+07	1.94809e+08	1.17153e+08	7.81389e+07	8.37155e+07	9.07987e+07	1.56408e+07	0.333333	1.00575e+08	1	1.2944e+08	1	8.42177e+07	1	0.155514	NA	1.53697	0.265159
Bo2g041280.1		pep chromosome:v2.1:C2:10798055:10807729:-1 gene:Bo2g041280 transcript:Bo2g041280.1 gene_biotype:protein_coding transcript_biotype:protein_coding	8.5443	13	294	1	1	1580	174.2	7.44	Not Found	Not Found	Not Found	Not Found	High	High	Not Found	Not Found	Not Found	Not Found	Not Found	Not Found	0.463	764.23	13	NA	NA	NA	NA	6.08352e+06	6.86018e+06	NA	NA	NA	NA	NA	NA	NA	0	6.47185e+06	0.666667	NA	0	NA	0	NA	NA	NA	NA
Bo9g108650.1	Pyruvate kinase	pep chromosome:v2.1:C9:35136151:35138901:1 gene:Bo9g108650 transcript:Bo9g108650.1 gene_biotype:protein_coding transcript_biotype:protein_coding description:Pyruvate kinase :UniProtKB/TrEMBL;Acc:A0A0D3EAH6]	31.8417	16	262	2	1	581	63.5	7.8	High	High	High	High	High	High	High	High	High	High	High	High	2.014	763.95	16	3.44708e+07	2.66866e+07	3.53721e+07	3.18114e+07	3.18922e+07	3.24162e+07	2.57475e+07	2.64779e+07	2.72945e+07	3.19834e+07	2.5774e+07	3.12957e+07	3.21765e+07	1	3.204e+07	1	2.65066e+07	1	2.96843e+07	1	1.00426	0.962965	0.892951	0.189993
Bo2g061040.1		pep chromosome:v2.1:C2:17649184:17653200:-1 gene:Bo2g061040 transcript:Bo2g061040.1 gene_biotype:protein_coding transcript_biotype:protein_coding	28.9105	23	303	7	1	927	103.1	6.9	High	High	High	High	High	High	High	High	High	High	High	High	2.225	763.21	23	6.77744e+07	8.58899e+07	8.78597e+07	7.23512e+07	6.96889e+07	5.4625e+07	6.45098e+07	6.65318e+07	7.31321e+07	9.3983e+07	1.06963e+08	9.98458e+07	8.0508e+07	1	6.5555e+07	1	6.80579e+07	1	1.00264e+08	1	1.2281	0.151325	0.678788	0.00213298
Bo7g030990.1		pep chromosome:v2.1:C7:11549605:11551348:1 gene:Bo7g030990 transcript:Bo7g030990.1 gene_biotype:protein_coding transcript_biotype:protein_coding	33.4437	13	296	3	1	302	34.6	9.31	High	High	High	High	High	High	High	High	High	High	High	High	3.894	761.57	13	1.27938e+08	1.22229e+08	1.58293e+08	1.37682e+08	1.46164e+08	1.42536e+08	1.28541e+08	1.29059e+08	121124289	1.29076e+08	1.24255e+08	1.71976e+08	1.36153e+08	1	1.42127e+08	1	1.26241e+08	1	1.41769e+08	1	0.957968	0.629651	0.890474	0.369878
Bo9g017620.1		pep chromosome:v2.1:C9:5134932:5136332:-1 gene:Bo9g017620 transcript:Bo9g017620.1 gene_biotype:protein_coding transcript_biotype:protein_coding	58.3333	14	282	3	1	240	26.4	7.42	High	High	High	High	High	High	High	High	High	High	High	High	6.406	760.97	14	1.53016e+08	1.46157e+08	1.55647e+08	1.8337e+08	1.93259e+08	1.75488e+08	2.54264e+08	1.63729e+08	1.6836e+08	2.56503e+08	2.5851e+08	2.54714e+08	1.51607e+08	1	1.84039e+08	1	1.95451e+08	1	2.56576e+08	1	0.823774	0.00523421	0.761767	0.106621
Bo4g179430.1		pep chromosome:v2.1:C4:47505027:47511012:1 gene:Bo4g179430 transcript:Bo4g179430.1 gene_biotype:protein_coding transcript_biotype:protein_coding	27.9861	21	257	4	1	1147	123.8	5.35	High	High	High	High	High	High	High	High	High	High	High	High	1.696	760.31	21	1.11549e+08	1.18082e+08	9.4412e+07	8.46009e+07	5.64009e+07	5.52178e+07	7.9336e+07	5.75897e+07	5.52494e+07	7.29117e+07	2.6983e+07	5.93109e+07	1.08015e+08	1	6.54065e+07	1	6.40584e+07	1	5.30685e+07	1	1.65143	0.023269	1.20709	0.52078
Bo1g082420.1	Casein kinase II subunit alpha-2	pep chromosome:v2.1:C1:24044208:24046345:1 gene:Bo1g082420 transcript:Bo1g082420.1 gene_biotype:protein_coding transcript_biotype:protein_coding description:Casein kinase II subunit alpha-2 :Projected from Arabidopsis thaliana (AT3G50000) UniProtKB/Swiss-Prot;Acc:Q08466]	47.4394	15	266	4	1	371	43.6	8.1	High	High	High	High	High	High	High	High	High	High	High	High	5.723	759.19	15	7.84799e+07	7.72813e+07	7.85695e+07	8.81756e+07	8.84333e+07	8.97836e+07	8.51812e+07	8.46819e+07	8.58946e+07	9.50515e+07	9.46406e+07	9.65838e+07	7.81102e+07	1	8.87975e+07	1	8.52526e+07	1	9.54253e+07	1	0.879644	7.9577e-05	0.893396	0.000121847
Bo3g003920.1		pep chromosome:v2.1:C3:1387972:1396590:-1 gene:Bo3g003920 transcript:Bo3g003920.1 gene_biotype:protein_coding transcript_biotype:protein_coding	32.376	38	360	5	1	1149	134.6	5.92	Not Found	Not Found	High	High	High	High	High	High	High	High	High	High	2.449	759.14	38	NA	NA	1.89554e+07	1.98964e+07	2.13273e+07	2.27281e+07	2.00894e+07	3.21037e+07	27633237	1.40966e+07	1.77361e+07	1.54873e+07	1.89554e+07	0.333333	2.13173e+07	1	2.66088e+07	1	1.57734e+07	1	0.889205	NA	1.68694	0.0416231
Bo4g140610.1	ATUK/UPRT1 description	pep chromosome:v2.1:C4:38052013:38054630:1 gene:Bo4g140610 transcript:Bo4g140610.1 gene_biotype:protein_coding transcript_biotype:protein_coding gene_symbol:ATUK/UPRT1 description:uridine kinase/uracil phosphoribosyltransferase 1 :TAIR;Acc:AT5G40870](projected from arabidopsis_thaliana,AT5G40870)	48.75	20	284	11	1	480	53.6	7.03	High	High	High	High	High	High	High	High	High	High	High	High	4.957	753.8	20	1.62437e+08	1.61549e+08	1.5398e+08	1.49879e+08	1.38775e+08	1.09142e+08	1.39046e+08	1.30418e+08	1.3566e+08	1.29893e+08	1.33907e+08	1.2673e+08	1.59322e+08	1	1.32598e+08	1	1.35041e+08	1	1.30177e+08	1	1.20154	0.0983873	1.03737	0.209616
Bo4g181610.1		pep chromosome:v2.1:C4:47665338:47667126:-1 gene:Bo4g181610 transcript:Bo4g181610.1 gene_biotype:protein_coding transcript_biotype:protein_coding	56.6978	15	276	1	1	321	35	9.16	High	High	High	High	High	High	High	High	High	High	High	High	4.055	752	15	4.94923e+07	3.85616e+07	4.73859e+07	3.09388e+07	4.77739e+07	4.60218e+07	3.49451e+07	4.19575e+07	5.49632e+07	4.62982e+07	6.12246e+07	5.54537e+07	4.51466e+07	1	4.15782e+07	1	4.39553e+07	1	5.43255e+07	1	1.08583	0.60171	0.809109	0.228422
Bo9g010770.1		pep chromosome:v2.1:C9:3304318:3308367:-1 gene:Bo9g010770 transcript:Bo9g010770.1 gene_biotype:protein_coding transcript_biotype:protein_coding	41.4184	30	318	10	1	705	81	7.5	High	High	High	High	High	High	High	High	High	High	High	High	2.857	751.14	30	8.38832e+07	8.50578e+07	6.86568e+07	6.58023e+07	6.61464e+07	6.77153e+07	5.66663e+07	5.96357e+07	6.78458e+07	7.0064e+07	8.03404e+07	7.17722e+07	7.91992e+07	1	6.65547e+07	1	6.13826e+07	1	7.40589e+07	1	1.18999	0.0760631	0.828836	0.0515039
Bo4g186450.1	S-adenosylmethionine synthase	pep chromosome:v2.1:C4:49475282:49476454:-1 gene:Bo4g186450 transcript:Bo4g186450.1 gene_biotype:protein_coding transcript_biotype:protein_coding description:S-adenosylmethionine synthase :UniProtKB/TrEMBL;Acc:A0A0D3C4M9]	46.6667	16	307	2	1	390	42.5	6.54	High	High	Not Found	Not Found	Not Found	Not Found	High	High	Not Found	Not Found	High	Not Found	4.946	751.12	16	1.2338e+08	1.32869e+08	NA	NA	NA	NA	1.08034e+07	3.05236e+07	NA	NA	1.717e+07	NA	1.28125e+08	0.666667	NA	0	2.06635e+07	0.666667	1.717e+07	0.333333	NA	NA	1.20347	NA
Bo5g058440.1		pep chromosome:v2.1:C5:18500499:18501758:1 gene:Bo5g058440 transcript:Bo5g058440.1 gene_biotype:protein_coding transcript_biotype:protein_coding	56.8019	23	293	4	1	419	46.7	6.29	High	High	High	High	High	High	High	High	High	High	High	High	4.436	748.1	23	2.16985e+07	1.93728e+07	2.44839e+07	4.66517e+07	4.13183e+07	2.69156e+07	4.57154e+07	4.82035e+07	62675915	2.97495e+07	2.66233e+07	2.99864e+07	2.18517e+07	1	3.82952e+07	1	5.21983e+07	1	2.87864e+07	1	0.570612	0.0537612	1.8133	0.0122784
Bo3g074670.1		pep chromosome:v2.1:C3:28581516:28585090:-1 gene:Bo3g074670 transcript:Bo3g074670.1 gene_biotype:protein_coding transcript_biotype:protein_coding	46.6055	24	351	3	1	545	59	6.3	High	High	High	High	High	High	High	High	High	High	High	High	2.556	747.38	24	5.80872e+07	8.19828e+07	6.73296e+07	7.06439e+07	7.30104e+07	4.87012e+07	9.55337e+07	9.43477e+07	9.9787e+07	9.23294e+07	9.42559e+07	8.89399e+07	6.91332e+07	1	6.41185e+07	1	9.65561e+07	1	9.18417e+07	1	1.07821	0.655058	1.05133	0.106123
Bo1g007080.1	40S ribosomal protein S3a	pep chromosome:v2.1:C1:2306812:2308077:-1 gene:Bo1g007080 transcript:Bo1g007080.1 gene_biotype:protein_coding transcript_biotype:protein_coding description:40S ribosomal protein S3a :UniProtKB/TrEMBL;Acc:A0A0D3A1Y2]	54.9618	18	322	3	1	262	29.9	9.77	High	High	High	High	High	High	High	High	High	High	High	High	7.377	746.88	18	2.85722e+08	2.12527e+08	2.04228e+08	1.96418e+08	2.0798e+08	1.94823e+08	1.85978e+08	1.70891e+08	1.9436e+08	8.49872e+07	1.56305e+08	1.60225e+08	2.34159e+08	1	1.9974e+08	1	1.83743e+08	1	1.33839e+08	1	1.17232	0.259571	1.37286	0.120878
Bo9g119120.1		pep chromosome:v2.1:C9:37839033:37847016:1 gene:Bo9g119120 transcript:Bo9g119120.1 gene_biotype:protein_coding transcript_biotype:protein_coding	11.8124	13	292	2	1	1109	122	6.34	High	Not Found	High	High	High	High	High	High	High	High	High	High	0.653	746.87	13	1.04866e+08	NA	1.05872e+08	1.46794e+08	1.41784e+08	1.6172e+08	1.53966e+08	1.52588e+08	1.50867e+08	2.01751e+08	1.88557e+08	2.09986e+08	1.05369e+08	0.666667	1.50099e+08	1	1.52474e+08	1	2.00098e+08	1	0.701995	0.010298	0.761994	0.00164638
Bo01540s020.1	Proteasome subunit alpha type	pep scaffold:v2.1:Scaffold01540:5200:5952:-1 gene:Bo01540s020 transcript:Bo01540s020.1 gene_biotype:protein_coding transcript_biotype:protein_coding description:Proteasome subunit alpha type :UniProtKB/TrEMBL;Acc:A0A0D2ZV84]	56.4	14	252	9	1	250	27.3	6.7	High	High	High	High	High	High	High	High	High	High	High	High	7.031	746.29	14	3.66375e+08	2.96524e+08	3.29508e+08	4.05348e+08	3.68609e+08	4.67412e+08	3.72279e+08	2.91113e+08	2.79146e+08	3.91428e+08	4.34643e+08	4.58072e+08	3.30802e+08	1	4.1379e+08	1	3.14179e+08	1	4.28047e+08	1	0.799446	0.0778083	0.733982	0.03174
Bo3g086960.1	Proteasome subunit alpha type	pep chromosome:v2.1:C3:32064273:32065919:1 gene:Bo3g086960 transcript:Bo3g086960.1 gene_biotype:protein_coding transcript_biotype:protein_coding description:Proteasome subunit alpha type :UniProtKB/TrEMBL;Acc:A0A0D3BDJ7]	62.7049	15	318	1	1	244	27.2	5.67	High	High	High	High	High	High	High	High	High	High	High	High	7.031	745.61	15	4.49403e+08	6.11427e+08	5.48702e+08	5.67702e+08	5.47757e+08	4.975e+08	5.40974e+08	5.01062e+08	5.99308e+08	5.00553e+08	6.07469e+08	6.18302e+08	5.36511e+08	1	5.37653e+08	1	5.47115e+08	1	5.75441e+08	1	0.997875	0.983394	0.950774	0.580573
Bo3g096560.1	P-loop containing nucleoside triphosphate hydrolases superfamily protein	pep chromosome:v2.1:C3:34883194:34884775:-1 gene:Bo3g096560 transcript:Bo3g096560.1 gene_biotype:protein_coding transcript_biotype:protein_coding description:P-loop containing nucleoside triphosphate hydrolases superfamily protein :Projected from Arabidopsis thaliana (AT5G67630) TAIR;Acc:AT5G67630]	45.7082	22	305	22	1	466	51.7	5.48	High	High	High	High	High	High	High	High	High	High	High	High	3.16	743.92	22	3.00298e+08	3.07507e+08	3.01332e+08	3.26386e+08	2.71326e+08	2.71742e+08	3.07784e+08	3.29342e+08	3.52351e+08	3.38558e+08	3.34604e+08	3.42452e+08	3.03046e+08	1	2.89818e+08	1	3.29826e+08	1	3.38538e+08	1	1.04564	0.512441	0.974265	0.54139
Bo7g026730.1	Subtilase family protein	pep chromosome:v2.1:C7:9783015:9785440:1 gene:Bo7g026730 transcript:Bo7g026730.1 gene_biotype:protein_coding transcript_biotype:protein_coding description:Subtilase family protein :TAIR;Acc:AT2G05920](projected from arabidopsis_thaliana,AT2G05920)	40.6045	22	249	22	1	761	80.9	7.99	High	High	High	High	High	High	High	High	High	High	High	High	2.467	743.56	22	1.90877e+08	1.97927e+08	1.81491e+08	2.0147e+08	2.08195e+08	1.87696e+08	1.82074e+08	1.82931e+08	1.83875e+08	2.39471e+08	2.31028e+08	1.8939e+08	1.90098e+08	1	1.99121e+08	1	1.8296e+08	1	2.19963e+08	1	0.954689	0.305538	0.831777	0.0752413
Bo8g063710.1		pep chromosome:v2.1:C8:20267975:20271615:-1 gene:Bo8g063710 transcript:Bo8g063710.1 gene_biotype:protein_coding transcript_biotype:protein_coding	57.0033	32	310	3	1	614	68.8	8.16	High	High	High	High	Not Found	Not Found	High	High	High	High	High	High	5.201	743.13	32	1.40638e+08	8.77795e+07	5.34869e+07	1.56729e+08	NA	NA	3.9355e+07	7.16693e+07	5.29691e+07	2.67326e+07	3.80944e+07	2.21408e+07	9.3968e+07	1	1.56729e+08	0.333333	5.46645e+07	1	2.89892e+07	1	0.599558	NA	1.88568	0.0707799
Bo2g023240.1		pep chromosome:v2.1:C2:5923928:5926708:-1 gene:Bo2g023240 transcript:Bo2g023240.1 gene_biotype:protein_coding transcript_biotype:protein_coding	55.5977	27	299	2	1	527	57.3	5.71	High	High	High	High	High	High	High	Not Found	Not Found	High	High	High	5.062	742.68	27	1.14143e+08	1.07699e+08	1.07521e+08	1.1844e+08	1.13673e+08	1.31925e+08	1.1816e+08	NA	NA	1.20546e+08	6.92566e+07	7.00062e+07	1.09787e+08	1	1.21346e+08	1	1.1816e+08	0.333333	8.66029e+07	1	0.904749	0.120929	1.36439	NA
Bo4g025890.1		pep chromosome:v2.1:C4:4684214:4688303:1 gene:Bo4g025890 transcript:Bo4g025890.1 gene_biotype:protein_coding transcript_biotype:protein_coding	35.1464	26	270	6	1	717	77.8	6.38	High	High	High	High	High	High	High	High	High	High	High	High	2.594	741.87	26	6.77429e+07	6.13408e+07	6.61567e+07	6.89754e+07	6.86075e+07	6.69377e+07	7.40349e+07	7.52793e+07	7.77864e+07	3.63611e+07	4.57931e+07	5.85057e+07	6.50801e+07	1	6.81735e+07	1	7.57002e+07	1	4.68867e+07	1	0.954625	0.201231	1.61454	0.0114577
Bo9g153690.1		pep chromosome:v2.1:C9:45655521:45656736:1 gene:Bo9g153690 transcript:Bo9g153690.1 gene_biotype:protein_coding transcript_biotype:protein_coding	44.3439	8	254	6	1	221	24	4.63	High	High	High	High	High	High	High	High	High	High	High	High	7.577	740.65	8	7.86653e+08	8.11644e+08	8.19744e+08	9.91019e+08	9.66897e+08	9.13699e+08	9.43111e+08	9.42116e+08	1001388619	8.69024e+08	8.30326e+08	8.22117e+08	8.06014e+08	1	9.57205e+08	1	9.62205e+08	1	8.40489e+08	1	0.842049	0.00372563	1.14482	0.00750174
Bo3g003810.1		pep chromosome:v2.1:C3:1356349:1356762:1 gene:Bo3g003810 transcript:Bo3g003810.1 gene_biotype:protein_coding transcript_biotype:protein_coding	42.3358	10	299	2	1	137	15.7	10.26	High	High	High	High	High	High	High	High	High	High	High	High	67.129	740.21	10	8.95052e+07	8.23059e+07	1.33185e+08	9.77839e+07	6.10791e+07	9.48028e+07	7.25337e+07	7.02459e+07	69179168	1.01874e+08	5.16238e+07	9.19292e+07	1.01665e+08	1	8.45552e+07	1	7.0653e+07	1	8.1809e+07	1	1.20236	0.435803	0.863633	0.508784
Bo2g055870.1		pep chromosome:v2.1:C2:16265172:16266411:1 gene:Bo2g055870 transcript:Bo2g055870.1 gene_biotype:protein_coding transcript_biotype:protein_coding	53.1429	10	452	1	1	175	19.8	10.11	High	High	High	High	High	High	High	High	High	High	High	High	5.813	739.12	10	4.62634e+08	3.37377e+08	4.78663e+08	4.85397e+08	4.297e+08	5.63235e+08	2.46159e+08	3.03824e+08	277733232	5.9667e+08	5.02958e+08	4.24364e+08	4.26225e+08	1	4.92777e+08	1	2.75905e+08	1	5.07997e+08	1	0.864944	0.32321	0.543123	0.0115191
Bo00667s060.1	UDP-glucose 6-dehydrogenase	pep scaffold:v2.1:Scaffold00667:49227:50669:1 gene:Bo00667s060 transcript:Bo00667s060.1 gene_biotype:protein_coding transcript_biotype:protein_coding description:UDP-glucose 6-dehydrogenase :UniProtKB/TrEMBL;Acc:A0A0D2ZQD4]	49.375	21	256	12	1	480	53.1	5.83	High	High	High	High	High	High	High	High	High	High	High	High	3.732	738.71	21	1.35871e+08	1.60559e+08	1.6175e+08	1.73766e+08	1.79022e+08	1.36152e+08	1.41443e+08	1.39098e+08	1.5376e+08	1.663e+08	1.16813e+08	1.4505e+08	1.52726e+08	1	1.6298e+08	1	1.44767e+08	1	1.42721e+08	1	0.937086	0.554549	1.01434	0.898328
Bo3g021740.1	Dihydrolipoamide succinyltransferase	pep chromosome:v2.1:C3:7342624:7345790:-1 gene:Bo3g021740 transcript:Bo3g021740.1 gene_biotype:protein_coding transcript_biotype:protein_coding description:Dihydrolipoamide succinyltransferase :Projected from Arabidopsis thaliana (AT5G55070) TAIR;Acc:AT5G55070]	26.7057	13	283	4	1	513	55.7	9.54	High	High	High	High	High	High	High	High	High	High	High	High	1.356	737.95	13	1.1996e+08	1.33477e+08	1.50625e+08	1.97712e+08	1.31275e+08	1.93053e+08	1.66133e+08	1.82866e+08	1.73785e+08	2.12594e+08	2.02056e+08	2.11938e+08	1.34688e+08	1	1.74013e+08	1	1.74261e+08	1	2.08862e+08	1	0.774007	0.164983	0.834336	0.00426429
Bo9g130750.1	Calcium-transporting ATPase	pep chromosome:v2.1:C9:40242476:40249093:-1 gene:Bo9g130750 transcript:Bo9g130750.1 gene_biotype:protein_coding transcript_biotype:protein_coding description:Calcium-transporting ATPase :UniProtKB/TrEMBL;Acc:A0A0D3EC03]	23.4657	25	292	10	1	1108	120	7.94	High	High	High	High	High	High	High	High	High	High	High	High	1.512	736.29	25	1.34473e+08	1.29319e+08	1.42142e+08	1.2795e+08	1.24453e+08	1.2529e+08	8.54435e+07	6.75018e+07	1.09375e+08	4.01493e+07	7.57548e+07	8.82806e+07	1.35311e+08	1	1.25897e+08	1	8.744e+07	1	6.80616e+07	1	1.07477	0.0718728	1.28472	0.361812
Bo2g133780.1	Aldolase superfamily protein	pep chromosome:v2.1:C2:41648617:41650329:-1 gene:Bo2g133780 transcript:Bo2g133780.1 gene_biotype:protein_coding transcript_biotype:protein_coding description:Aldolase superfamily protein :TAIR;Acc:AT2G01140](projected from arabidopsis_thaliana,AT2G01140)	45.7584	14	276	12	1	389	42.3	8.32	High	High	High	High	High	High	High	High	High	High	High	High	2.808	736.1	14	6.48906e+08	6.34846e+08	6.42119e+08	5.78812e+08	5.82978e+08	5.5982e+08	4.76407e+08	4.8701e+08	5.10092e+08	4.65913e+08	4.52591e+08	4.77398e+08	6.41957e+08	1	5.7387e+08	1	4.9117e+08	1	4.65301e+08	1	1.11865	0.00115006	1.0556	0.102445
Bo9g097350.1		pep chromosome:v2.1:C9:31546881:31549893:-1 gene:Bo9g097350 transcript:Bo9g097350.1 gene_biotype:protein_coding transcript_biotype:protein_coding	41.7582	11	253	2	1	364	39.2	6.09	High	High	High	High	High	High	High	High	High	High	High	High	2.981	735.97	11	1.74509e+08	1.49846e+08	1.61051e+08	1.79969e+08	1.86107e+08	1.65837e+08	1.35228e+08	1.38644e+08	1.33073e+08	1.18552e+08	1.10001e+08	1.20467e+08	1.61802e+08	1	1.77305e+08	1	1.35648e+08	1	1.1634e+08	1	0.912565	0.171534	1.16597	0.0058502
Bo2g023680.1		pep chromosome:v2.1:C2:6242831:6244771:-1 gene:Bo2g023680 transcript:Bo2g023680.1 gene_biotype:protein_coding transcript_biotype:protein_coding	37.8251	17	304	3	1	423	46.6	6.48	High	High	High	High	High	High	High	High	High	High	High	High	3.354	735.39	17	2.75676e+08	2.63307e+08	2.35517e+08	2.75871e+08	3.28372e+08	2.75848e+08	3.26354e+08	2.22305e+08	3.73536e+08	3.06801e+08	2.84216e+08	2.79306e+08	2.58167e+08	1	2.93364e+08	1	3.07398e+08	1	2.90108e+08	1	0.880023	0.171442	1.0596	0.723071
Bo3g005000.1	unknown protein; FUNCTIONS IN	pep chromosome:v2.1:C3:1903475:1904989:1 gene:Bo3g005000 transcript:Bo3g005000.1 gene_biotype:protein_coding transcript_biotype:protein_coding description:unknown protein; FUNCTIONS IN: molecular_function unknown; INVOLVED IN: biological_process unknown; LOCATED IN: chloroplast thylakoid membrane, chloroplast, chloroplast envelope; EXPRESSED IN: 24 plant structures; EXPRESSED DURING: 13 growth st…	43.2203	15	246	15	1	354	39.4	5.29	High	High	High	High	High	High	High	High	High	High	High	High	3.299	734.17	15	2.90071e+08	2.79513e+08	2.5602e+08	2.15704e+08	1.81907e+08	1.97289e+08	2.37336e+08	2.43323e+08	2.38151e+08	3.36828e+08	3.11822e+08	3.26708e+08	2.75201e+08	1	1.983e+08	1	2.39604e+08	1	3.25119e+08	1	1.3878	0.005388	0.736971	0.000337489
Bo6g087120.1		pep chromosome:v2.1:C6:27445338:27449972:1 gene:Bo6g087120 transcript:Bo6g087120.1 gene_biotype:protein_coding transcript_biotype:protein_coding	30.6924	39	309	11	1	1401	153.3	5.25	High	High	High	High	High	High	High	High	High	High	High	High	1.665	732.7	39	5.41596e+07	5.46439e+07	5.6033e+07	5.20345e+07	5.94607e+07	6.10454e+07	3.84105e+07	2.66936e+07	2.82935e+07	4.38178e+07	4.77725e+07	4.8542e+07	5.49455e+07	1	5.75135e+07	1	3.11325e+07	1	4.67108e+07	1	0.955349	0.416051	0.666496	0.0168954
Bo6g118590.1		pep chromosome:v2.1:C6:36982546:36987168:-1 gene:Bo6g118590 transcript:Bo6g118590.1 gene_biotype:protein_coding transcript_biotype:protein_coding	28.4083	36	311	8	1	1401	153.4	5.25	High	High	High	High	High	High	High	High	High	High	High	High	1.63	731.37	36	5.89749e+07	6.75332e+07	6.98631e+07	5.26831e+07	5.50063e+07	7.11517e+07	2.09223e+07	3.10942e+07	3.41585e+07	4.25979e+07	4.61887e+07	5.06996e+07	6.54571e+07	1	5.96137e+07	1	2.8725e+07	1	4.64954e+07	1	1.09802	0.4314	0.617803	0.0185738
Bo3g058640.1	40S ribosomal protein S3a	pep chromosome:v2.1:C3:22547230:22548546:1 gene:Bo3g058640 transcript:Bo3g058640.1 gene_biotype:protein_coding transcript_biotype:protein_coding description:40S ribosomal protein S3a :UniProtKB/TrEMBL;Acc:A0A0D3B9Q0]	51.9084	16	306	3	1	262	29.9	9.79	High	High	High	High	High	High	High	High	High	High	High	High	6.017	730.63	16	7.61284e+07	7.58287e+07	7.78244e+07	8.51378e+07	8.34893e+07	8.86083e+07	6.74563e+07	7.27329e+07	7.60097e+07	6.8056e+07	6.97027e+07	6.65649e+07	7.65938e+07	1	8.57451e+07	1	7.20663e+07	1	6.81079e+07	1	0.893274	0.00496347	1.05812	0.209707
Bo7g009410.1	Transducin/WD40 repeat-like superfamily protein	pep chromosome:v2.1:C7:2575975:2579708:1 gene:Bo7g009410 transcript:Bo7g009410.1 gene_biotype:protein_coding transcript_biotype:protein_coding description:Transducin/WD40 repeat-like superfamily protein :TAIR;Acc:AT2G18900](projected from arabidopsis_thaliana,AT2G18900)	28.75	19	264	19	1	800	87.4	7.21	High	High	High	High	High	High	High	High	High	High	High	High	2.03	728.63	19	1.73611e+08	1.65784e+08	1.53369e+08	1.59129e+08	1.46079e+08	1.43188e+08	1.67342e+08	1.70995e+08	1.65063e+08	1.63366e+08	1.58746e+08	1.62857e+08	1.64255e+08	1	1.49465e+08	1	1.678e+08	1	1.61657e+08	1	1.09895	0.12593	1.038	0.0533213
Bo3g183930.1	phosphoenolpyruvate carboxylase 1	pep chromosome:v2.1:C3:63565588:63569871:-1 gene:Bo3g183930 transcript:Bo3g183930.1 gene_biotype:protein_coding transcript_biotype:protein_coding description:phosphoenolpyruvate carboxylase 1 :Projected from Arabidopsis thaliana (AT1G53310) TAIR;Acc:AT1G53310]	37.4481	34	309	13	1	964	110	6.02	High	High	High	High	High	High	High	High	High	High	High	High	2.205	728.06	34	7.73148e+07	1.77166e+08	1.82737e+08	1.3218e+08	9.72031e+07	9.8618e+07	4.93477e+07	4.84227e+07	4.69815e+07	1.14171e+08	1.0685e+08	4.22702e+07	1.45739e+08	1	1.09334e+08	1	4.82506e+07	1	8.77638e+07	1	1.33298	0.370367	0.549778	0.158896
Bo5g052040.1	60S ribosomal protein L17-1	pep chromosome:v2.1:C5:17238342:17239696:1 gene:Bo5g052040 transcript:Bo5g052040.1 gene_biotype:protein_coding transcript_biotype:protein_coding description:60S ribosomal protein L17-1 :Projected from Arabidopsis thaliana (AT1G27400) UniProtKB/Swiss-Prot;Acc:Q93VI3]	52.8409	10	448	1	1	176	19.9	10.15	High	High	High	High	High	High	High	High	High	High	High	High	5.813	726.58	10	1.0046e+08	7.32016e+07	9.57792e+07	1.08857e+08	8.94096e+07	1.15363e+08	5.52012e+07	5.85709e+07	5.26986e+07	9.46571e+07	8.12284e+07	6.85694e+07	8.98135e+07	1	1.04543e+08	1	5.54902e+07	1	8.1485e+07	1	0.859105	0.268466	0.680987	0.0281364
Bo7g084300.1	Uridine kinase	pep chromosome:v2.1:C7:33076097:33079635:-1 gene:Bo7g084300 transcript:Bo7g084300.1 gene_biotype:protein_coding transcript_biotype:protein_coding description:Uridine kinase :UniProtKB/TrEMBL;Acc:A0A0D3DB73]	47.619	20	300	7	1	483	54.2	6.49	High	High	High	High	High	High	High	High	High	High	High	High	4.878	725.45	20	5.76033e+07	5.07639e+07	6.4311e+07	7.4113e+07	7.48523e+07	7.43949e+07	8.23187e+07	9.17203e+07	5.05649e+07	6.84382e+07	7.64672e+07	7.35101e+07	5.75594e+07	1	7.44534e+07	1	7.4868e+07	1	7.28052e+07	1	0.773093	0.0125133	1.02833	0.878559
Bo4g187600.1		pep chromosome:v2.1:C4:50249937:50252131:1 gene:Bo4g187600 transcript:Bo4g187600.1 gene_biotype:protein_coding transcript_biotype:protein_coding	22.869	10	242	1	1	481	51.9	7.33	Not Found	High	High	Not Found	Not Found	Not Found	Not Found	Not Found	Not Found	Not Found	Not Found	Not Found	2.562	725.31	10	NA	NA	4.13447e+07	NA	NA	NA	NA	NA	NA	NA	NA	NA	4.13447e+07	0.333333	NA	0	NA	0	NA	0	NA	NA	NA	NA
Bo6g081130.1	Proteasome subunit alpha type-2-B	pep chromosome:v2.1:C6:24979728:24981452:1 gene:Bo6g081130 transcript:Bo6g081130.1 gene_biotype:protein_coding transcript_biotype:protein_coding description:Proteasome subunit alpha type-2-B :Projected from Arabidopsis thaliana (AT1G79210) UniProtKB/Swiss-Prot;Acc:Q8L4A7]	59.5745	10	210	3	1	235	25.8	5.49	High	High	High	High	High	High	High	High	High	High	High	High	6.743	725.05	10	2.52035e+08	2.52677e+08	2.39133e+08	2.89467e+08	2.99422e+08	2.15146e+08	2.45655e+08	2.54365e+08	4.53685e+08	2.8288e+08	2.07891e+08	2.16511e+08	2.47948e+08	1	2.68012e+08	1	3.17902e+08	1	2.35761e+08	1	0.925141	0.497986	1.34841	0.317308
Bo2g047320.1	Pyruvate kinase	pep chromosome:v2.1:C2:12825711:12828576:-1 gene:Bo2g047320 transcript:Bo2g047320.1 gene_biotype:protein_coding transcript_biotype:protein_coding description:Pyruvate kinase :UniProtKB/TrEMBL;Acc:A0A0D3AMM2]	29.6552	16	257	2	1	580	63.5	7.37	High	High	High	High	High	High	High	High	High	High	High	High	2.162	724.61	16	1.71e+07	1.64278e+07	2.05425e+07	4.66196e+07	2.58693e+07	4.6177e+07	3.7501e+07	3.98725e+07	3.9992e+07	3.99315e+07	3.38103e+07	3.91757e+07	1.80234e+07	1	3.95553e+07	1	3.91218e+07	1	3.76392e+07	1	0.455652	0.0364733	1.03939	0.517358
Bo7g109770.1		pep chromosome:v2.1:C7:43488768:43491042:-1 gene:Bo7g109770 transcript:Bo7g109770.1 gene_biotype:protein_coding transcript_biotype:protein_coding	44.7028	17	266	4	1	387	44.1	5.47	High	High	High	High	High	High	High	High	High	High	High	High	3.977	722.53	17	6.58696e+07	6.22692e+07	1.23618e+08	1.33499e+08	1.29966e+08	1.27685e+08	1.75596e+08	1.78841e+08	1.70092e+08	1.48814e+08	1.40409e+08	1.38359e+08	8.39189e+07	1	1.30383e+08	1	1.74843e+08	1	1.42527e+08	1	0.643632	0.0803203	1.22673	0.00139151
Bo7g102650.1	ATP synthase subunit d, mitochondrial	pep chromosome:v2.1:C7:39702125:39703275:-1 gene:Bo7g102650 transcript:Bo7g102650.1 gene_biotype:protein_coding transcript_biotype:protein_coding description:ATP synthase subunit d, mitochondrial :UniProtKB/TrEMBL;Acc:A0A0D3DE66]	75	19	280	2	1	168	19.6	5.02	High	High	High	High	High	High	High	High	High	High	High	High	15.681	720.33	19	6.95612e+07	7.46976e+07	7.19273e+07	6.43384e+07	9.22091e+07	1.0301e+08	8.69925e+07	8.03024e+07	8.56196e+07	9.19577e+07	9.18097e+07	8.75409e+07	7.2062e+07	1	8.65192e+07	1	8.43048e+07	1	9.04361e+07	1	0.832902	0.28121	0.932203	0.0703958
Bo1g039360.1		pep chromosome:v2.1:C1:11951255:11953625:-1 gene:Bo1g039360 transcript:Bo1g039360.1 gene_biotype:protein_coding transcript_biotype:protein_coding	36.8421	20	301	1	1	494	53.7	6.8	High	High	High	High	High	High	High	High	High	High	Not Found	High	2.639	718.66	20	1.35089e+08	1.44971e+08	1.29978e+08	1.48467e+08	1.43818e+08	1.67711e+08	1.07155e+08	1.28876e+08	117417874	1.26265e+08	NA	1.4027e+08	1.36679e+08	1	1.53332e+08	1	1.17816e+08	1	1.33267e+08	0.666667	0.891395	0.122826	0.88406	0.207123
Bo8g065000.1	UDP-D-glucose/UDP-D-galactose 4-epimerase 1	pep chromosome:v2.1:C8:20423053:20425018:-1 gene:Bo8g065000 transcript:Bo8g065000.1 gene_biotype:protein_coding transcript_biotype:protein_coding description:UDP-D-glucose/UDP-D-galactose 4-epimerase 1 :Projected from Arabidopsis thaliana (AT1G12780) TAIR;Acc:AT1G12780]	62.963	19	242	7	1	351	39.2	7.14	High	High	High	High	High	High	High	High	High	High	High	High	5.494	716.87	19	6.73017e+07	6.64572e+07	6.68756e+07	6.89643e+07	6.48948e+07	5.49486e+07	4.11945e+07	5.72727e+07	4.5841e+07	5.57919e+07	7.03411e+07	5.19889e+07	6.68782e+07	1	6.29359e+07	1	4.81027e+07	1	5.9374e+07	1	1.06264	0.397993	0.810165	0.200175
Bo00706s050.1	Isocitrate dehydrogenase [NADP]	pep scaffold:v2.1:Scaffold00706:99082:101875:1 gene:Bo00706s050 transcript:Bo00706s050.1 gene_biotype:protein_coding transcript_biotype:protein_coding description:Isocitrate dehydrogenase [NADP] :UniProtKB/TrEMBL;Acc:A0A0D2ZQQ0]	51.5513	23	278	2	1	419	46.9	7.43	High	Not Found	Not Found	Not Found	Not Found	Not Found	High	High	Not Found	Not Found	Not Found	Not Found	5.31	715.83	23	NA	NA	NA	NA	NA	NA	7.73236e+06	6.18438e+06	NA	NA	NA	NA	NA	0	NA	0	6.95837e+06	0.666667	NA	0	NA	NA	NA	NA
Bo3g065170.1		pep chromosome:v2.1:C3:25057056:25059479:1 gene:Bo3g065170 transcript:Bo3g065170.1 gene_biotype:protein_coding transcript_biotype:protein_coding	42.7723	22	350	8	1	505	57	8.56	High	High	High	High	High	High	High	High	High	High	High	High	3.903	714.45	22	5.76929e+07	5.38025e+07	8.12392e+07	7.47998e+07	5.99211e+07	5.81112e+07	8.28686e+07	8.65062e+07	8.38747e+07	9.15709e+07	9.19638e+07	9.4754e+07	6.42449e+07	1	6.42774e+07	1	8.44165e+07	1	9.27629e+07	1	0.999494	0.997579	0.910024	0.00482504
Bo8g112860.1		pep chromosome:v2.1:C8:40037781:40041775:-1 gene:Bo8g112860 transcript:Bo8g112860.1 gene_biotype:protein_coding transcript_biotype:protein_coding	29.9357	29	278	2	1	1089	119	5.17	Not Found	High	Not Found	High	High	High	Not Found	Not Found	Not Found	Not Found	Not Found	Not Found	1.744	714.17	29	NA	9.91769e+06	NA	3.88776e+06	2.1698e+07	1.87719e+07	NA	NA	NA	NA	NA	NA	9.91769e+06	0.333333	1.47859e+07	1	NA	0	NA	0	0.670754	NA	NA	NA
Bo1g151870.1	40S ribosomal protein S3a	pep chromosome:v2.1:C1:42591817:42594485:-1 gene:Bo1g151870 transcript:Bo1g151870.1 gene_biotype:protein_coding transcript_biotype:protein_coding description:40S ribosomal protein S3a :UniProtKB/TrEMBL;Acc:A0A0D3AFK9]	29.6435	18	297	4	1	533	58.8	9.32	High	High	High	High	High	High	High	High	High	High	High	High	2.162	713.77	18	1.6345e+07	1.49156e+07	9.67785e+07	1.16843e+08	5.99881e+07	4.81877e+07	5.58314e+07	9.42863e+07	1.10576e+08	6.21448e+07	8.81372e+07	7.7895e+07	4.26797e+07	1	7.50062e+07	1	8.6898e+07	1	7.6059e+07	1	0.569016	0.400141	1.14251	0.577578
Bo4g181820.1		pep chromosome:v2.1:C4:47776008:47780217:-1 gene:Bo4g181820 transcript:Bo4g181820.1 gene_biotype:protein_coding transcript_biotype:protein_coding	56.1905	21	285	11	1	525	56.9	6.2	High	High	High	High	High	High	High	High	High	High	High	High	5.469	712.96	21	4.3389e+07	4.3701e+07	7.48632e+07	8.89488e+07	9.15337e+07	9.12499e+07	8.97677e+07	1.00111e+08	9.83747e+07	8.85899e+07	8.08971e+07	7.12869e+07	5.39844e+07	1	9.05775e+07	1	9.60844e+07	1	8.0258e+07	1	0.596002	0.0250219	1.19719	0.0561209
Bo00805s020.1		pep scaffold:v2.1:Scaffold00805:37388:40916:1 gene:Bo00805s020 transcript:Bo00805s020.1 gene_biotype:protein_coding transcript_biotype:protein_coding	32.5397	13	276	1	1	504	54.6	7.37	High	High	Not Found	Not Found	Not Found	Not Found	Not Found	Not Found	Not Found	Not Found	Not Found	Not Found	2.252	707.74	13	1.02402e+07	8.67343e+06	NA	NA	NA	NA	NA	NA	NA	NA	NA	NA	9.4568e+06	0.666667	NA	0	NA	0	NA	0	NA	NA	NA	NA
Bo7g003400.1	RPN1A description	pep chromosome:v2.1:C7:373537:378887:-1 gene:Bo7g003400 transcript:Bo7g003400.1 gene_biotype:protein_coding transcript_biotype:protein_coding gene_symbol:RPN1A description:26S proteasome regulatory subunit S2 1A :TAIR;Acc:AT2G20580](projected from arabidopsis_thaliana,AT2G20580)	30.5275	22	276	3	1	891	97.7	5.14	High	Not Found	Not Found	Not Found	High	Not Found	Not Found	High	Not Found	Not Found	Not Found	Not Found	1.894	707.39	22	1.9926e+07	NA	NA	NA	1.87868e+07	NA	NA	1.02068e+06	NA	NA	NA	NA	1.9926e+07	0.333333	1.87868e+07	0.333333	1.02068e+06	0.333333	NA	0	1.06064	NA	NA	NA
Bo3g103460.1		pep chromosome:v2.1:C3:37119180:37120850:1 gene:Bo3g103460 transcript:Bo3g103460.1 gene_biotype:protein_coding transcript_biotype:protein_coding	57.9167	13	278	2	1	240	26.4	7.81	High	High	High	High	High	High	High	High	High	High	High	High	6.406	705.1	13	1.25908e+08	1.20274e+08	1.66133e+08	1.23092e+08	1.90665e+08	2.1416e+08	1.47945e+08	1.39058e+08	133138623	1.94949e+08	1.82129e+08	1.76692e+08	1.37438e+08	1	1.75972e+08	1	1.40047e+08	1	1.8459e+08	1	0.781024	0.280147	0.758692	0.00298718
Bo3g141520.1		pep chromosome:v2.1:C3:50995218:50996737:1 gene:Bo3g141520 transcript:Bo3g141520.1 gene_biotype:protein_coding transcript_biotype:protein_coding	52.8409	10	441	1	1	176	19.9	10.11	Not Found	Not Found	Not Found	Not Found	Not Found	High	Not Found	High	High	High	High	Not Found	5.158	705.07	10	NA	NA	NA	NA	NA	1.09887e+07	NA	1.28229e+07	7.88877e+06	1.40387e+07	1.37718e+07	NA	NA	0	1.09887e+07	0.333333	1.03558e+07	0.666667	1.39053e+07	0.666667	NA	NA	0.744742	0.287355
Bo4g026890.1		pep chromosome:v2.1:C4:5398728:5405753:1 gene:Bo4g026890 transcript:Bo4g026890.1 gene_biotype:protein_coding transcript_biotype:protein_coding	18.9663	39	302	8	1	2341	272.2	8.88	High	High	High	High	High	High	High	High	High	High	High	High	0.675	703.76	39	3.56709e+07	2.99874e+07	3.58693e+07	3.26192e+07	2.24202e+07	3.59518e+07	3.67473e+07	3.10919e+07	3.84646e+07	4.31953e+07	4.46819e+07	3.3479e+07	3.38425e+07	1	3.03304e+07	1	3.54346e+07	1	4.04521e+07	1	1.1158	0.479096	0.875965	0.294168
Bo5g065830.1	AK-HSDH I description	pep chromosome:v2.1:C5:20965579:20969833:-1 gene:Bo5g065830 transcript:Bo5g065830.1 gene_biotype:protein_coding transcript_biotype:protein_coding gene_symbol:AK-HSDH I description:aspartate kinase-homoserine dehydrogenase i :TAIR;Acc:AT1G31230](projected from arabidopsis_thaliana,AT1G31230)	36.1142	30	299	27	1	911	99	7.21	High	High	High	High	High	High	High	High	High	High	High	High	2.481	698.31	30	1.13422e+08	1.16968e+08	1.16006e+08	1.43431e+08	1.41558e+08	1.42529e+08	1.12155e+08	1.05081e+08	1.11248e+08	1.04813e+08	9.46011e+07	9.89057e+07	1.15466e+08	1	1.42506e+08	1	1.09495e+08	1	9.94398e+07	1	0.810251	2.21465e-05	1.10111	0.0531785
Bo2g003960.1		pep chromosome:v2.1:C2:604409:610966:1 gene:Bo2g003960 transcript:Bo2g003960.1 gene_biotype:protein_coding transcript_biotype:protein_coding	20.4147	10	206	1	1	627	67.9	5.67	High	High	High	High	High	High	High	High	High	High	High	High	1.239	696.25	10	1.76807e+08	1.75983e+08	1.83225e+08	2.26469e+08	2.36586e+08	2.50995e+08	2.22031e+08	2.36533e+08	2.48089e+08	2.07999e+08	2.0462e+08	2.11923e+08	1.78671e+08	1	2.38017e+08	1	2.35551e+08	1	2.08181e+08	1	0.750667	0.001363	1.13147	0.0249742
Bo3g021010.1	Pyruvate kinase	pep chromosome:v2.1:C3:6958330:6960899:1 gene:Bo3g021010 transcript:Bo3g021010.1 gene_biotype:protein_coding transcript_biotype:protein_coding description:Pyruvate kinase :UniProtKB/TrEMBL;Acc:A0A0D3B372]	51.004	23	295	4	1	498	54.5	6.13	High	High	High	High	High	High	High	High	High	High	High	High	3.556	695.26	23	7.07782e+07	7.82892e+07	6.2189e+07	6.86357e+07	6.55036e+07	6.48616e+07	6.70495e+07	8.04515e+07	8.01004e+07	6.33913e+07	6.37704e+07	4.61746e+07	7.04188e+07	1	6.63337e+07	1	7.58672e+07	1	5.77788e+07	1	1.06158	0.442251	1.31306	0.0680848
Bo3g052800.1	DNA helicase	pep chromosome:v2.1:C3:20909433:20913437:-1 gene:Bo3g052800 transcript:Bo3g052800.1 gene_biotype:protein_coding transcript_biotype:protein_coding description:DNA helicase :UniProtKB/TrEMBL;Acc:A0A0D3B8W3]	43.3148	27	290	5	1	718	80.4	6.06	High	High	High	High	High	High	High	High	High	High	High	High	2.406	694.99	27	2.96086e+07	2.98758e+07	3.95245e+07	3.95255e+07	2.49306e+07	2.04291e+07	2.72596e+07	3.33095e+07	3.13308e+07	2.81194e+07	1.69919e+07	2.72998e+07	3.3003e+07	1	2.82951e+07	1	3.06333e+07	1	2.4137e+07	1	1.16639	0.516403	1.26914	0.179589
Bo4g104820.1		pep chromosome:v2.1:C4:26069212:26071910:-1 gene:Bo4g104820 transcript:Bo4g104820.1 gene_biotype:protein_coding transcript_biotype:protein_coding	30.2041	18	296	2	1	735	79.2	6.35	High	High	High	High	High	High	High	High	High	High	High	High	1.467	694.72	18	4.99402e+07	5.30747e+07	4.96508e+07	6.67781e+07	5.46982e+07	6.09052e+07	4.27797e+07	4.6542e+07	4.58271e+07	4.42438e+07	5.14347e+07	3.93429e+07	5.08886e+07	1	6.07938e+07	1	4.50496e+07	1	4.50071e+07	1	0.837068	0.0535689	1.00094	0.991383
Bo3g026900.1		pep chromosome:v2.1:C3:9961680:9963679:1 gene:Bo3g026900 transcript:Bo3g026900.1 gene_biotype:protein_coding transcript_biotype:protein_coding	55.2239	16	257	2	1	335	36.7	9.29	High	High	Not Found	Not Found	Not Found	Not Found	Not Found	Not Found	Not Found	Not Found	Not Found	Not Found	3.52	693.94	16	1.34546e+08	1.44184e+08	NA	NA	NA	NA	NA	NA	NA	NA	NA	NA	1.39365e+08	0.666667	NA	0	NA	0	NA	0	NA	NA	NA	NA
Bo9g024150.1	ROC3 description	pep chromosome:v2.1:C9:7613092:7613607:1 gene:Bo9g024150 transcript:Bo9g024150.1 gene_biotype:protein_coding transcript_biotype:protein_coding gene_symbol:ROC3 description:rotamase CYP 3 :TAIR;Acc:AT2G16600](projected from arabidopsis_thaliana,AT2G16600)	67.8363	9	235	9	1	171	18.4	8.15	High	High	High	High	High	High	High	High	High	High	High	High	5.661	693.45	9	4.52906e+08	4.51969e+08	4.53862e+08	4.95369e+08	4.90119e+08	5.08004e+08	4.39065e+08	4.34151e+08	4.48642e+08	5.29316e+08	5.132e+08	5.12648e+08	4.52912e+08	1	4.97831e+08	1	4.40619e+08	1	5.18388e+08	1	0.909772	0.00109006	0.84998	0.000358457
Bo8g058250.1	ATSAR1 description	pep chromosome:v2.1:C8:18732128:18734212:-1 gene:Bo8g058250 transcript:Bo8g058250.1 gene_biotype:protein_coding transcript_biotype:protein_coding gene_symbol:ATSAR1 description:secretion-associated RAS super family 1 :TAIR;Acc:AT1G09180](projected from arabidopsis_thaliana,AT1G09180)	42.0896	16	269	4	1	335	38.1	9.8	High	High	High	High	High	High	High	High	High	High	High	High	6.11	693.16	16	5.05494e+08	5.1636e+08	2.84624e+08	5.51598e+08	5.28634e+08	4.85365e+08	3.95489e+08	9.22399e+07	9.2421e+07	5.71877e+08	5.70661e+08	5.84298e+08	4.35493e+08	1	5.21866e+08	1	1.93383e+08	1	5.75612e+08	1	0.834491	0.33001	0.335961	0.0194535
Bo3g096370.1		pep chromosome:v2.1:C3:34793705:34795921:-1 gene:Bo3g096370 transcript:Bo3g096370.1 gene_biotype:protein_coding transcript_biotype:protein_coding	38.3592	15	243	13	1	451	50.2	6.14	High	High	High	High	High	High	High	High	High	High	High	High	4.298	692.92	15	1.68622e+08	1.60701e+08	1.99269e+08	8.871e+07	1.06045e+08	1.10383e+08	1.33086e+08	1.5307e+08	1.53941e+08	1.50727e+08	1.42224e+08	1.63489e+08	1.76197e+08	1	1.01712e+08	1	1.46699e+08	1	1.52147e+08	1	1.73231	0.00526209	0.964195	0.585482
Bo5g134950.1	Fatty acyl-CoA reductase	pep chromosome:v2.1:C5:41921790:41924156:-1 gene:Bo5g134950 transcript:Bo5g134950.1 gene_biotype:protein_coding transcript_biotype:protein_coding description:Fatty acyl-CoA reductase :UniProtKB/TrEMBL;Acc:A0A0D3CL08]	54.085	29	277	14	1	612	67.8	8.7	High	High	High	High	High	High	High	High	High	High	High	High	4.38	687.29	29	7.47645e+07	1.03751e+08	1.13135e+08	1.71685e+08	1.68537e+08	1.83383e+08	4.43464e+07	5.33846e+07	4.62431e+07	3.27584e+07	4.38729e+07	4.71378e+07	9.7217e+07	1	1.74535e+08	1	4.79914e+07	1	4.12564e+07	1	0.557006	0.00337059	1.16325	0.260981
Bo2g011650.1		pep chromosome:v2.1:C2:3170634:3172285:-1 gene:Bo2g011650 transcript:Bo2g011650.1 gene_biotype:protein_coding transcript_biotype:protein_coding	38.3784	14	320	2	1	370	39.7	9.28	High	High	High	High	High	High	High	High	High	High	High	High	3.175	686.47	14	2.56171e+08	2.53704e+08	2.37822e+08	2.82242e+08	2.99108e+08	2.72625e+08	2.03642e+08	2.06083e+08	2.18045e+08	1.93727e+08	2.11775e+08	2.01273e+08	2.49232e+08	1	2.84658e+08	1	2.09257e+08	1	2.02258e+08	1	0.875549	0.0213129	1.0346	0.365953
Bo2g012570.1		pep chromosome:v2.1:C2:3670125:3674020:-1 gene:Bo2g012570 transcript:Bo2g012570.1 gene_biotype:protein_coding transcript_biotype:protein_coding	30.9129	26	263	2	1	964	108.1	6.28	Not Found	Not Found	Not Found	Not Found	Not Found	Not Found	High	High	High	Not Found	Not Found	High	1.136	682.48	26	NA	NA	NA	NA	NA	NA	1.21582e+07	3.27183e+07	1.34904e+07	NA	NA	6.07615e+06	NA	0	NA	0	1.94556e+07	1	6.07615e+06	0.333333	NA	NA	3.20197	NA
Bo1g007260.1	Coatomer subunit gamma	pep chromosome:v2.1:C1:2402523:2407114:-1 gene:Bo1g007260 transcript:Bo1g007260.1 gene_biotype:protein_coding transcript_biotype:protein_coding description:Coatomer subunit gamma :UniProtKB/TrEMBL;Acc:A0A0D3A200]	44.3567	32	275	5	1	886	98.4	5.16	High	High	High	High	High	High	High	High	High	High	High	High	1.792	680.81	32	5.79074e+07	6.09046e+07	5.73755e+07	6.78839e+07	6.91598e+07	6.82383e+07	7.73132e+07	7.57995e+07	8.03401e+07	7.56326e+07	7.21745e+07	7.48628e+07	5.87292e+07	1	6.84274e+07	1	7.78176e+07	1	7.42233e+07	1	0.85827	0.00112822	1.04843	0.101594
Bo4g027060.1		pep chromosome:v2.1:C4:5529570:5536248:1 gene:Bo4g027060 transcript:Bo4g027060.1 gene_biotype:protein_coding transcript_biotype:protein_coding	20.6339	28	246	8	1	1546	176.6	5.95	High	High	High	High	High	High	High	High	High	High	High	High	0.947	678.98	28	5.48904e+07	5.17423e+07	5.21452e+07	6.00559e+07	6.02203e+07	6.31986e+07	5.52556e+07	6.66615e+07	55199026	6.44328e+07	6.00256e+07	6.67593e+07	5.2926e+07	1	6.11583e+07	1	5.90387e+07	1	6.37392e+07	1	0.865394	0.00442105	0.926254	0.33501
Bo8g097750.1	RNA helicase family protein	pep chromosome:v2.1:C8:33355944:33358862:-1 gene:Bo8g097750 transcript:Bo8g097750.1 gene_biotype:protein_coding transcript_biotype:protein_coding description:RNA helicase family protein :TAIR;Acc:AT3G62310](projected from arabidopsis_thaliana,AT3G62310)	39.6936	25	292	14	1	718	81.7	7.46	High	High	High	High	High	High	High	High	High	High	High	High	2.043	678.71	25	1.70233e+08	1.70171e+08	1.48078e+08	1.16531e+08	1.22214e+08	1.08676e+08	1.07112e+08	1.06435e+08	1.11878e+08	8.98959e+07	1.79055e+08	9.00955e+07	1.62827e+08	1	1.15807e+08	1	1.08475e+08	1	1.19682e+08	1	1.40602	0.00490144	0.906356	0.72539
Bo1g119140.1	Glutamine synthetase	pep chromosome:v2.1:C1:35779096:35781148:-1 gene:Bo1g119140 transcript:Bo1g119140.1 gene_biotype:protein_coding transcript_biotype:protein_coding description:Glutamine synthetase :UniProtKB/TrEMBL;Acc:A0A0D3ACR3]	33.6158	9	225	3	1	354	38.6	7.09	High	High	High	High	High	High	High	High	High	High	High	High	2.631	677.71	9	1.26777e+08	1.27074e+08	1.20989e+08	2.61513e+08	2.44496e+08	2.41738e+08	1.67336e+08	1.61353e+08	1.67331e+08	1.25516e+08	1.32143e+08	1.29946e+08	1.24947e+08	1	2.49249e+08	1	1.6534e+08	1	1.29202e+08	1	0.501293	4.38662e-05	1.2797	0.000204279
Bo7g026760.1	Proteasome subunit alpha type	pep chromosome:v2.1:C7:9797792:9799424:-1 gene:Bo7g026760 transcript:Bo7g026760.1 gene_biotype:protein_coding transcript_biotype:protein_coding description:Proteasome subunit alpha type :UniProtKB/TrEMBL;Acc:A0A0D3D4D5]	62.1951	15	292	1	1	246	27.3	5.86	High	High	High	High	High	High	High	High	Not Found	High	High	High	7.031	677.64	15	2.3147e+08	4.00071e+08	4.52608e+08	3.08435e+08	2.70516e+08	2.43928e+08	4.15836e+08	2.38692e+08	NA	4.08115e+08	3.93123e+08	4.52714e+08	3.61383e+08	1	2.74293e+08	1	3.27264e+08	0.666667	4.17984e+08	1	1.31751	0.277119	0.782959	0.28536
Bo7g050130.1		pep chromosome:v2.1:C7:18379157:18381508:1 gene:Bo7g050130 transcript:Bo7g050130.1 gene_biotype:protein_coding transcript_biotype:protein_coding	42.0245	12	258	3	1	326	34.5	8.65	High	High	High	High	High	High	High	High	High	High	High	High	3.394	677.63	12	1.57676e+08	1.55264e+08	2.08682e+08	1.30014e+08	1.33503e+08	1.70898e+08	1.14375e+08	1.1962e+08	1.14596e+08	1.59836e+08	1.74785e+08	1.7218e+08	1.73874e+08	1	1.44805e+08	1	1.16197e+08	1	1.68934e+08	1	1.20075	0.252984	0.687823	0.000428707
Bo7g116980.1	40S ribosomal protein S3a	pep chromosome:v2.1:C7:46744420:46745722:1 gene:Bo7g116980 transcript:Bo7g116980.1 gene_biotype:protein_coding transcript_biotype:protein_coding description:40S ribosomal protein S3a :UniProtKB/TrEMBL;Acc:A0A0D3DHQ0]	49.8084	17	291	1	1	261	29.8	9.79	High	High	High	High	High	Not Found	High	High	High	High	High	Not Found	6.017	675.79	17	7.83515e+07	6.62923e+07	6.80768e+07	7.10527e+07	8.52969e+07	NA	6.46565e+07	5.10078e+07	7.33843e+07	8.21769e+07	6.76428e+07	NA	7.09069e+07	1	7.81748e+07	0.666667	6.30162e+07	1	7.49099e+07	0.666667	0.90703	0.386621	0.841227	0.319857
Bo5g139640.1		pep chromosome:v2.1:C5:43445556:43448266:1 gene:Bo5g139640 transcript:Bo5g139640.1 gene_biotype:protein_coding transcript_biotype:protein_coding	30.2752	20	238	20	1	872	96.3	4.75	High	High	High	High	High	High	High	High	High	High	High	High	1.593	675.04	20	2.24173e+08	2.42171e+08	2.73286e+08	2.86756e+08	2.71177e+08	3.10879e+08	3.43546e+08	3.19462e+08	3.52968e+08	2.94732e+08	2.57269e+08	2.9556e+08	2.46544e+08	1	2.89604e+08	1	3.38659e+08	1	2.8252e+08	1	0.851312	0.0795385	1.1987	0.0251614
Bo1g022160.1	QRT3	pep chromosome:v2.1:C1:8147112:8149233:-1 gene:Bo1g022160 transcript:Bo1g022160.1 gene_biotype:protein_coding transcript_biotype:protein_coding gene_symbol:QRT3	46.5263	18	245	18	1	475	51	6.55	High	High	High	High	High	High	High	High	High	High	High	High	3.252	674.96	18	2.40282e+08	2.21407e+08	2.15391e+08	1.36373e+08	1.34277e+08	1.36854e+08	2.36333e+08	2.1563e+08	2.25893e+08	2.33674e+08	2.32812e+08	2.40859e+08	2.25693e+08	1	1.35835e+08	1	2.25952e+08	1	2.35782e+08	1	1.66153	0.000283963	0.958309	0.204894
Bo6g074920.1		pep chromosome:v2.1:C6:21901876:21904693:1 gene:Bo6g074920 transcript:Bo6g074920.1 gene_biotype:protein_coding transcript_biotype:protein_coding	28.5938	17	257	1	1	640	68.3	8.25	High	Not Found	High	Not Found	High	Not Found	Not Found	Not Found	High	Not Found	Not Found	Not Found	2.403	673.08	17	3.08934e+07	NA	3.20893e+07	NA	3.35406e+07	NA	NA	NA	1.19657e+07	NA	NA	NA	3.14913e+07	0.666667	3.35406e+07	0.333333	1.19657e+07	0.333333	NA	0	0.938903	NA	NA	NA
Bo5g146950.1	40S ribosomal protein S3a	pep chromosome:v2.1:C5:45461378:45462927:-1 gene:Bo5g146950 transcript:Bo5g146950.1 gene_biotype:protein_coding transcript_biotype:protein_coding description:40S ribosomal protein S3a :UniProtKB/TrEMBL;Acc:A0A0D3CMR4]	62.2137	18	284	4	1	262	29.8	9.72	High	High	High	High	High	High	High	High	High	High	High	High	6.667	671.97	18	7.17305e+07	1.16426e+07	1.3265e+07	7.14743e+07	2.21066e+07	7.60916e+07	6.42359e+07	6.53369e+07	6.90973e+07	1.10286e+08	4.26487e+07	1.73995e+07	3.22127e+07	1	5.65575e+07	1	6.62234e+07	1	5.67779e+07	1	0.569557	0.406222	1.16636	0.750851
Bo9g163450.1		pep chromosome:v2.1:C9:48079934:48080731:-1 gene:Bo9g163450 transcript:Bo9g163450.1 gene_biotype:protein_coding transcript_biotype:protein_coding	41.0526	9	237	4	1	190	22	9.79	High	High	High	High	High	High	High	High	High	High	High	High	7.799	671.65	9	8.84433e+08	9.52311e+08	9.5957e+08	7.05431e+08	7.04734e+08	7.39174e+08	8.80314e+08	8.51726e+08	8.72916e+08	7.84602e+08	8.43437e+08	8.86644e+08	9.32105e+08	1	7.16447e+08	1	8.68319e+08	1	8.38227e+08	1	1.30101	0.00123861	1.0359	0.383728
Bo5g135050.1		pep chromosome:v2.1:C5:41973872:41982837:1 gene:Bo5g135050 transcript:Bo5g135050.1 gene_biotype:protein_coding transcript_biotype:protein_coding	25.2236	30	288	3	1	1118	130.5	5.67	Not Found	High	High	High	High	High	High	High	High	High	High	High	1.757	670.18	30	NA	7.83509e+06	1.12239e+07	1.07189e+07	1.08833e+07	1.08544e+07	1.31595e+07	1.01175e+07	1.18171e+07	1.01391e+07	6.97276e+06	5.2016e+06	9.5295e+06	0.666667	1.08189e+07	1	1.16981e+07	1	7.43781e+06	1	0.880821	0.382989	1.57278	0.0654284
Bo8g092830.1		pep chromosome:v2.1:C8:31736578:31737637:1 gene:Bo8g092830 transcript:Bo8g092830.1 gene_biotype:protein_coding transcript_biotype:protein_coding	27.1111	6	254	6	1	225	25.5	9.76	High	High	High	High	High	High	High	High	High	High	High	High	2.384	665.75	6	4.79495e+09	4.48874e+09	4.43319e+09	3.80371e+09	3.62976e+09	3.67588e+09	4.05549e+09	3.98988e+09	3929250143	4.27712e+09	4.26999e+09	4.20319e+09	4.57229e+09	1	3.70312e+09	1	3.99154e+09	1	4.2501e+09	1	1.23471	0.00217621	0.939164	0.00398286
Bo1g046560.1		pep chromosome:v2.1:C1:13472550:13475759:1 gene:Bo1g046560 transcript:Bo1g046560.1 gene_biotype:protein_coding transcript_biotype:protein_coding	30.4521	24	294	1	1	752	84.9	8.37	Not Found	Not Found	Not Found	Not Found	Not Found	High	Not Found	High	Not Found	Not Found	Not Found	Not Found	1.794	665.6	24	NA	NA	NA	NA	NA	8.62675e+07	NA	7.89221e+07	NA	NA	NA	NA	NA	0	8.62675e+07	0.333333	7.89221e+07	0.333333	NA	0	NA	NA	NA	NA
Bo9g166210.1		pep chromosome:v2.1:C9:49204284:49205937:1 gene:Bo9g166210 transcript:Bo9g166210.1 gene_biotype:protein_coding transcript_biotype:protein_coding	43.3243	15	320	2	1	367	39.2	9.22	High	High	High	High	High	High	High	High	High	High	High	High	3.175	663.54	15	3.92268e+08	3.78421e+08	3.51687e+08	4.10821e+08	4.00879e+08	4.21012e+08	3.30794e+08	3.23785e+08	321751926	3.29032e+08	1.60365e+08	1.78589e+08	3.74125e+08	1	4.10904e+08	1	3.25444e+08	1	2.22662e+08	1	0.910493	0.0500617	1.4616	0.12718
Bo7g061230.1		pep chromosome:v2.1:C7:22437484:22444874:1 gene:Bo7g061230 transcript:Bo7g061230.1 gene_biotype:protein_coding transcript_biotype:protein_coding	25.8918	34	256	17	1	1626	185	5.4	High	High	High	High	High	High	High	High	High	High	High	High	1.154	663.49	34	8.81959e+07	1.08794e+08	1.33314e+08	1.2043e+08	1.28461e+08	1.18251e+08	1.13111e+08	1.15672e+08	8.66495e+07	1.59405e+08	1.55969e+08	1.46858e+08	1.10101e+08	1	1.22381e+08	1	1.05144e+08	1	1.54077e+08	1	0.899662	0.411486	0.68241	0.00809243
Bo2g012940.1		pep chromosome:v2.1:C2:3893025:3896537:1 gene:Bo2g012940 transcript:Bo2g012940.1 gene_biotype:protein_coding transcript_biotype:protein_coding	11.9205	8	220	1	1	604	68.7	9.09	High	High	High	High	High	High	High	High	High	High	High	High	1.121	663.28	8	3.32805e+08	2.93178e+08	2.89902e+08	2.01873e+08	2.10455e+08	1.94579e+08	2.92018e+08	2.70808e+08	2.85601e+08	2.74178e+08	2.17225e+08	2.55257e+08	3.05295e+08	1	2.02302e+08	1	2.82809e+08	1	2.48887e+08	1	1.5091	0.00209204	1.13629	0.130744
Bo3g173910.1	Coatomer subunit beta	pep chromosome:v2.1:C3:61084843:61088066:-1 gene:Bo3g173910 transcript:Bo3g173910.1 gene_biotype:protein_coding transcript_biotype:protein_coding description:Coatomer subunit beta :UniProtKB/TrEMBL;Acc:A0A0D3BLZ9]	28.5865	27	309	4	1	948	105.9	5.97	High	High	High	High	High	High	High	High	High	High	High	High	1.465	662.88	27	4.14375e+07	4.92148e+07	4.4463e+07	5.64552e+07	6.19744e+07	6.01983e+07	4.61706e+07	4.92325e+07	5.41652e+07	3.94093e+07	3.82169e+07	5.42629e+07	4.50384e+07	1	5.95426e+07	1	4.98561e+07	1	4.3963e+07	1	0.756407	0.00649994	1.13405	0.35677
Bo1g139550.1	FLR1 description	pep chromosome:v2.1:C1:39955471:39956730:1 gene:Bo1g139550 transcript:Bo1g139550.1 gene_biotype:protein_coding transcript_biotype:protein_coding gene_symbol:FLR1 description:Leucine-rich repeat (LRR) family protein :Projected from Arabidopsis thaliana (AT3G12145) TAIR;Acc:AT3G12145]	35.6923	8	251	6	1	325	35.8	8.9	High	High	High	High	High	High	High	High	High	High	High	High	2.34	662.88	8	5.03392e+08	4.81177e+08	4.69661e+08	3.54131e+08	3.27547e+08	3.45653e+08	3.22872e+08	3.00941e+08	3.19939e+08	3.61312e+08	3.98436e+08	3.67448e+08	4.84743e+08	1	3.42444e+08	1	3.14584e+08	1	3.75732e+08	1	1.41554	0.000353301	0.837255	0.0102829
Bo5g134680.1		pep chromosome:v2.1:C5:41793068:41794217:1 gene:Bo5g134680 transcript:Bo5g134680.1 gene_biotype:protein_coding transcript_biotype:protein_coding	43.2515	13	262	11	1	326	36.4	9.42	High	High	High	High	High	High	High	High	High	High	High	High	3.047	662.78	13	3.93925e+08	3.88357e+08	3.66967e+08	2.5101e+08	2.0014e+08	2.41466e+08	2.39555e+08	2.39352e+08	2.57909e+08	2.84504e+08	3.43486e+08	3.13314e+08	3.83083e+08	1	2.30872e+08	1	2.45605e+08	1	3.13768e+08	1	1.65929	0.000992204	0.782761	0.0196935
Bo5g007830.1		pep chromosome:v2.1:C5:2554239:2558923:-1 gene:Bo5g007830 transcript:Bo5g007830.1 gene_biotype:protein_coding transcript_biotype:protein_coding	26.1692	22	247	8	1	1005	111.1	5.86	High	High	High	High	High	High	High	High	High	High	High	High	1.094	661.69	22	7.78487e+07	8.30918e+07	8.11214e+07	7.94127e+07	7.66619e+07	9.059e+07	1.02936e+08	1.07822e+08	1.03998e+08	8.72918e+07	8.35292e+07	9.30743e+07	8.06873e+07	1	8.22215e+07	1	1.04919e+08	1	8.79651e+07	1	0.98134	0.751627	1.19273	0.00574416
Bo9g164090.1	UDP-glucose 6-dehydrogenase	pep chromosome:v2.1:C9:48515812:48517254:1 gene:Bo9g164090 transcript:Bo9g164090.1 gene_biotype:protein_coding transcript_biotype:protein_coding description:UDP-glucose 6-dehydrogenase :UniProtKB/TrEMBL;Acc:A0A0D3EFA9]	48.3333	19	245	10	1	480	53	6.46	High	High	High	High	High	High	High	High	High	High	High	High	3.217	660.48	19	9.84977e+07	1.13865e+08	1.17044e+08	1.47226e+08	1.66226e+08	1.5792e+08	1.11688e+08	1.15773e+08	1.18137e+08	9.43275e+07	1.08962e+08	1.02445e+08	1.09802e+08	1	1.57124e+08	1	1.15199e+08	1	1.01911e+08	1	0.698825	0.00397778	1.13039	0.045563
Bo3g027150.1		pep chromosome:v2.1:C3:10109356:10112316:-1 gene:Bo3g027150 transcript:Bo3g027150.1 gene_biotype:protein_coding transcript_biotype:protein_coding	50.2165	17	212	4	1	462	48.5	8.05	High	Not Found	High	High	High	High	High	High	High	High	High	High	3.977	660.43	17	5.0397e+07	NA	4.64533e+07	7.40852e+07	5.15384e+07	5.34877e+07	8.04639e+07	3.80782e+07	4.0458e+07	2.70949e+07	7.72198e+07	4.20604e+07	4.84251e+07	0.666667	5.97038e+07	1	5.3e+07	1	4.87917e+07	1	0.81109	0.31746	1.08625	0.845462
Bo1g154780.1		pep chromosome:v2.1:C1:43049910:43057872:-1 gene:Bo1g154780 transcript:Bo1g154780.1 gene_biotype:protein_coding transcript_biotype:protein_coding	30.8973	29	276	9	1	1081	118	6.2	High	High	High	High	High	High	High	High	High	High	High	High	1.783	658.55	29	6.23122e+07	6.51085e+07	6.9245e+07	6.96774e+07	7.28916e+07	7.74805e+07	4.40631e+07	4.20172e+07	4.48897e+07	6.18491e+07	5.74796e+07	4.70141e+07	6.55552e+07	1	7.33498e+07	1	4.36567e+07	1	5.54476e+07	1	0.893733	0.0618239	0.78735	0.0581921
Bo3g009570.1	PHT3;1 description	pep chromosome:v2.1:C3:3266411:3269780:-1 gene:Bo3g009570 transcript:Bo3g009570.1 gene_biotype:protein_coding transcript_biotype:protein_coding gene_symbol:PHT3;1 description:phosphate transporter 3;1 :TAIR;Acc:AT5G14040](projected from arabidopsis_thaliana,AT5G14040)	35.9375	16	308	5	1	448	47.9	9.28	High	High	High	High	High	High	High	High	High	High	High	High	2.268	658.3	16	2.23534e+08	2.33868e+08	2.24903e+08	2.3153e+08	2.24724e+08	1.98765e+08	1.91395e+08	2.00972e+08	2.14491e+08	1.65583e+08	1.65301e+08	1.61927e+08	2.27435e+08	1	2.1834e+08	1	2.02286e+08	1	1.6427e+08	1	1.04166	0.435053	1.23142	0.00502774
Bo3g055710.1	Ribosomal protein S7e family protein	pep chromosome:v2.1:C3:22056282:22057100:1 gene:Bo3g055710 transcript:Bo3g055710.1 gene_biotype:protein_coding transcript_biotype:protein_coding description:Ribosomal protein S7e family protein :TAIR;Acc:AT3G02560](projected from arabidopsis_thaliana,AT3G02560)	45.5497	9	240	5	1	191	22.2	9.92	High	High	High	High	High	High	High	High	High	High	High	High	4.995	658.02	9	1.64208e+09	1.46813e+09	1.70811e+09	1.35132e+09	1.18441e+09	1.24592e+09	1.50086e+09	1.51441e+09	1529836210	1.47215e+09	2.1991e+09	1.53389e+09	1.6061e+09	1	1.26055e+09	1	1.51504e+09	1	1.73505e+09	1	1.27413	0.0162547	0.873195	0.398248
Bo3g015130.1	Ribosomal protein S8e family protein	pep chromosome:v2.1:C3:5008057:5009395:-1 gene:Bo3g015130 transcript:Bo3g015130.1 gene_biotype:protein_coding transcript_biotype:protein_coding description:Ribosomal protein S8e family protein :TAIR;Acc:AT5G20290](projected from arabidopsis_thaliana,AT5G20290)	46.9027	8	211	2	1	226	25.3	10.26	High	High	High	High	High	High	High	High	High	High	High	High	2.34	657.76	8	2.51713e+08	4.8756e+08	4.89744e+08	4.81696e+08	4.5648e+08	4.61127e+08	4.76544e+08	4.78348e+08	223750153	2.47231e+08	4.09091e+08	4.45831e+08	4.09672e+08	1	4.66434e+08	1	3.92881e+08	1	3.67384e+08	1	0.878307	0.513992	1.0694	0.818866
Bo1g108250.1		pep chromosome:v2.1:C1:33178716:33181016:1 gene:Bo1g108250 transcript:Bo1g108250.1 gene_biotype:protein_coding transcript_biotype:protein_coding	38.8298	12	218	2	1	376	41.2	6.62	High	High	High	High	High	Not Found	High	High	High	High	High	High	3.642	656.47	12	NA	NA	7.33083e+06	NA	7.31602e+07	NA	NA	NA	77776345	7.84408e+07	8.03615e+07	8.80877e+07	7.33083e+06	0.333333	7.31602e+07	0.333333	77776345	0.333333	8.22966e+07	1	0.100202	NA	0.945073	NA
Bo3g010160.1		pep chromosome:v2.1:C3:3533848:3535137:-1 gene:Bo3g010160 transcript:Bo3g010160.1 gene_biotype:protein_coding transcript_biotype:protein_coding	41.6244	11	282	8	1	197	22.9	10.13	High	High	High	High	High	High	High	High	High	High	High	High	5.449	654.65	11	1.72366e+09	1.66431e+09	1.6546e+09	1.74285e+09	1.61583e+09	1.61017e+09	1.63737e+09	1.61529e+09	1640568806	1.51318e+09	1.52229e+09	1.50181e+09	1.68086e+09	1	1.65628e+09	1	1.63108e+09	1	1.51243e+09	1	1.01484	0.638304	1.07845	0.000279109
Bo5g021670.1	GAPCP-2 description	pep chromosome:v2.1:C5:7747762:7750763:1 gene:Bo5g021670 transcript:Bo5g021670.1 gene_biotype:protein_coding transcript_biotype:protein_coding gene_symbol:GAPCP-2 description:glyceraldehyde-3-phosphate dehydrogenase of plastid 2 :TAIR;Acc:AT1G16300](projected from arabidopsis_thaliana,AT1G16300)	41.784	14	227	4	1	426	45.6	7.83	High	High	High	High	High	High	High	High	High	High	High	High	2.384	653.3	14	2.45385e+07	2.85109e+07	2.67767e+07	1.42011e+07	1.30403e+07	2.44133e+07	1.80239e+07	1.96532e+07	1.63752e+07	1.88015e+07	1.8552e+07	1.72749e+07	2.66087e+07	1	1.72182e+07	1	1.80174e+07	1	1.82095e+07	1	1.54538	0.0684584	0.989454	0.864767
Bo8g080790.1		pep chromosome:v2.1:C8:27366642:27368220:-1 gene:Bo8g080790 transcript:Bo8g080790.1 gene_biotype:protein_coding transcript_biotype:protein_coding	62.3762	19	258	3	1	202	23.3	5.43	High	High	High	High	High	High	High	High	High	High	High	High	10.22	652.76	19	7.62737e+07	7.50525e+07	8.34827e+07	7.02745e+07	5.61122e+07	6.08931e+07	7.58164e+07	8.85477e+07	7.28358e+07	7.06647e+07	9.19411e+07	2.43742e+08	7.82696e+07	1	6.24266e+07	1	7.90666e+07	1	1.35449e+08	1	1.25379	0.0323051	0.583736	0.360945
Bo6g044130.1	EMB3003 description	pep chromosome:v2.1:C6:11785263:11787210:1 gene:Bo6g044130 transcript:Bo6g044130.1 gene_biotype:protein_coding transcript_biotype:protein_coding gene_symbol:EMB3003 description:2-oxoacid dehydrogenases acyltransferase family protein :TAIR;Acc:AT1G34430](projected from arabidopsis_thaliana,AT1G34430)	45.614	14	214	12	1	456	47.8	8.6	High	High	High	High	High	High	High	High	High	High	High	High	3.101	648.8	14	1.27268e+08	1.25301e+08	1.47598e+08	2.05199e+08	2.00684e+08	1.9806e+08	1.64646e+08	1.63527e+08	1.77329e+08	1.92195e+08	1.86787e+08	1.95511e+08	1.33389e+08	1	2.01314e+08	1	1.68501e+08	1	1.91497e+08	1	0.66259	0.00079274	0.879913	0.0107792
Bo5g141550.1		pep chromosome:v2.1:C5:43878725:43882735:-1 gene:Bo5g141550 transcript:Bo5g141550.1 gene_biotype:protein_coding transcript_biotype:protein_coding	29.312	26	243	4	1	1061	115.7	5.16	High	High	High	High	High	High	Not Found	High	Not Found	Not Found	Not Found	Not Found	1.512	647.11	26	5.92509e+07	5.73297e+07	5.75051e+07	3.58292e+07	5.23317e+07	4.97093e+07	NA	4.45414e+07	NA	NA	NA	NA	5.80286e+07	1	4.59567e+07	1	4.45414e+07	0.333333	NA	0	1.26268	0.0792896	NA	NA
Bo2g096000.1		pep chromosome:v2.1:C2:27236906:27243307:1 gene:Bo2g096000 transcript:Bo2g096000.1 gene_biotype:protein_coding transcript_biotype:protein_coding	31.8486	27	285	6	1	898	102.3	7.94	High	High	High	High	High	High	High	High	High	High	High	High	1.54	646.24	27	NA	1.43234e+07	NA	4.47999e+07	1.76181e+07	5.80378e+07	4.34998e+07	4.17884e+07	3.49946e+07	3.11589e+07	3.31915e+07	3.69784e+07	1.43234e+07	0.333333	4.01519e+07	1	4.00943e+07	1	3.37763e+07	1	0.356731	NA	1.18705	0.11177
Bo3g168690.1	40S ribosomal protein S3a	pep chromosome:v2.1:C3:59427778:59429176:-1 gene:Bo3g168690 transcript:Bo3g168690.1 gene_biotype:protein_coding transcript_biotype:protein_coding description:40S ribosomal protein S3a :UniProtKB/TrEMBL;Acc:A0A0D3BLC5]	54.7893	17	283	3	1	261	29.8	9.72	High	High	High	High	High	High	High	High	High	High	High	Not Found	7.377	643.98	17	2.09415e+08	2.27424e+08	9.97422e+07	1.61778e+08	1.50782e+08	2.00189e+08	1.41668e+08	1.28566e+08	241025727	1.1933e+07	1.44332e+07	NA	1.78861e+08	1	1.70916e+08	1	1.7042e+08	1	1.31831e+07	0.666667	1.04648	0.8612	12.9272	0.0415488
Bo9g174370.1		pep chromosome:v2.1:C9:51502362:51504182:1 gene:Bo9g174370 transcript:Bo9g174370.1 gene_biotype:protein_coding transcript_biotype:protein_coding	42.3868	18	246	1	1	486	53.4	8.16	High	High	High	High	Not Found	Not Found	Not Found	High	Not Found	High	High	High	2.899	643.89	18	3.6452e+07	4.39086e+07	3.75538e+07	3.95569e+07	NA	NA	NA	5.2638e+07	NA	5.50576e+07	5.44549e+07	6.21219e+07	3.93048e+07	1	3.95569e+07	0.333333	5.2638e+07	0.333333	5.72115e+07	1	0.993626	NA	0.920061	NA
Bo3g070270.1	ATGSKB6 description	pep chromosome:v2.1:C3:27480446:27482726:1 gene:Bo3g070270 transcript:Bo3g070270.1 gene_biotype:protein_coding transcript_biotype:protein_coding gene_symbol:ATGSKB6 description:glutamine synthetase 1.3 :TAIR;Acc:AT3G17820](projected from arabidopsis_thaliana,AT3G17820)	31.0734	11	252	3	1	354	38.6	6.87	High	High	High	High	High	High	High	High	High	High	High	High	4.109	643.45	11	9.89432e+07	1.42827e+08	9.79995e+07	2.27741e+08	2.22344e+08	2.21709e+08	1.75189e+08	9.48203e+07	1.92604e+08	8.04553e+07	6.39713e+07	1.13051e+08	1.13257e+08	1	2.23931e+08	1	1.54204e+08	1	8.5826e+07	1	0.505766	0.00175874	1.79671	0.10995
Bo3g004980.1		pep chromosome:v2.1:C3:1897027:1898799:-1 gene:Bo3g004980 transcript:Bo3g004980.1 gene_biotype:protein_coding transcript_biotype:protein_coding	42.3868	18	246	1	1	486	53.4	8.27	Not Found	High	High	High	High	High	Not Found	Not Found	Not Found	High	High	High	2.899	643.13	18	NA	7.76824e+07	1.14592e+07	6.98155e+07	7.12353e+07	6.60177e+07	NA	NA	NA	7.32823e+07	8.02873e+07	7.14899e+07	4.45708e+07	0.666667	6.90228e+07	1	NA	0	7.50199e+07	1	0.64574	0.396206	NA	NA
Bo9g152030.1	40S ribosomal protein S8	pep chromosome:v2.1:C9:45285391:45286745:1 gene:Bo9g152030 transcript:Bo9g152030.1 gene_biotype:protein_coding transcript_biotype:protein_coding description:40S ribosomal protein S8 :UniProtKB/TrEMBL;Acc:A0A0D3EDU6]	46.4602	8	213	2	1	226	25.3	10.26	High	High	High	High	High	High	High	High	High	High	High	High	2.728	642.52	8	1.56235e+08	1.3551e+08	2.76277e+08	1.3515e+08	1.43369e+08	2.59127e+08	1.39934e+08	1.36234e+08	2.61867e+08	2.7718e+08	2.76216e+08	2.80663e+08	1.89341e+08	1	1.79215e+08	1	1.79345e+08	1	2.78019e+08	1	1.0565	0.872907	0.64508	0.0752176
Bo4g125520.1	ATP synthase subunit d, mitochondrial	pep chromosome:v2.1:C4:32528527:32529880:-1 gene:Bo4g125520 transcript:Bo4g125520.1 gene_biotype:protein_coding transcript_biotype:protein_coding description:ATP synthase subunit d, mitochondrial :UniProtKB/TrEMBL;Acc:A0A0D3BYJ6]	80.9524	18	250	3	1	168	19.7	5.17	High	High	High	Not Found	Not Found	Not Found	Not Found	High	Not Found	Not Found	Not Found	Not Found	13.678	642.51	18	1.38275e+08	1.49373e+08	NA	NA	NA	NA	NA	1.04228e+08	NA	NA	NA	NA	1.43824e+08	0.666667	NA	0	1.04228e+08	0.333333	NA	0	NA	NA	NA	NA
Bo5g043080.1		pep chromosome:v2.1:C5:14235993:14241939:-1 gene:Bo5g043080 transcript:Bo5g043080.1 gene_biotype:protein_coding transcript_biotype:protein_coding	34.4737	38	299	38	1	1140	127.7	6.38	High	High	High	High	High	High	High	High	High	High	High	High	2.384	642.43	38	1.54421e+08	1.43621e+08	1.31753e+08	1.88336e+08	1.60918e+08	1.59737e+08	1.60705e+08	1.68501e+08	1.94177e+08	2.53366e+08	2.62888e+08	2.46696e+08	1.43265e+08	1	1.69664e+08	1	1.74461e+08	1	2.54317e+08	1	0.844407	0.0816617	0.686	0.00201167
Bo2g155380.1	Histone H2A	pep chromosome:v2.1:C2:48446202:48446738:-1 gene:Bo2g155380 transcript:Bo2g155380.1 gene_biotype:protein_coding transcript_biotype:protein_coding description:Histone H2A :UniProtKB/TrEMBL;Acc:A0A0D3AXA2]	42.3841	6	212	3	1	151	16.1	10.49	High	High	High	High	High	High	High	High	High	High	High	High	4.623	642.06	6	2.26601e+09	1.53981e+09	2.94112e+09	2.77832e+09	2.78354e+09	3.08799e+09	2.57249e+09	1.30893e+09	1460206442	1.62704e+09	3.09673e+09	1.77119e+09	2.24898e+09	1	2.88329e+09	1	1.78054e+09	1	2.16499e+09	1	0.780007	0.203193	0.822425	0.565415
Bo6g123740.1		pep chromosome:v2.1:C6:39292332:39305020:-1 gene:Bo6g123740 transcript:Bo6g123740.1 gene_biotype:protein_coding transcript_biotype:protein_coding	20.2392	42	288	19	1	2090	235.4	4.97	High	High	High	High	High	High	High	High	High	High	High	High	0.768	642.02	42	4.45445e+07	4.39526e+07	3.96882e+07	5.69605e+07	6.08771e+07	3.81672e+07	5.29358e+07	4.15427e+07	5.17632e+07	5.11096e+07	5.30038e+07	5.23583e+07	4.27285e+07	1	5.20016e+07	1	4.87472e+07	1	5.21572e+07	1	0.821676	0.265759	0.934621	0.404305
Bo8g019190.1	PAF2 description	pep chromosome:v2.1:C8:4314928:4316531:-1 gene:Bo8g019190 transcript:Bo8g019190.1 gene_biotype:protein_coding transcript_biotype:protein_coding gene_symbol:PAF2 description:20S proteasome alpha subunit F2 :TAIR;Acc:AT1G47250](projected from arabidopsis_thaliana,AT1G47250)	31.5961	9	199	2	1	307	34.2	5.9	High	High	Not Found	High	High	High	High	High	High	High	Not Found	Not Found	2.831	641.99	9	2.93206e+07	2.57977e+07	NA	3.30177e+07	3.23249e+07	3.47687e+07	2.55143e+07	2.97686e+07	2.81028e+07	4.77796e+07	NA	NA	2.75591e+07	0.666667	3.33704e+07	1	2.77952e+07	1	4.77796e+07	0.333333	0.825855	0.0367491	0.581738	NA
Bo3g044430.1		pep chromosome:v2.1:C3:18362517:18363536:1 gene:Bo3g044430 transcript:Bo3g044430.1 gene_biotype:protein_coding transcript_biotype:protein_coding	56.5789	10	266	10	1	152	17.5	10.39	High	High	High	High	High	High	High	High	High	High	High	High	10.788	640.41	10	2.14332e+09	2.18726e+09	2.29877e+09	2.00885e+09	2.00202e+09	1.93218e+09	2.22565e+09	2.30322e+09	2231738789	1.92558e+09	1.71984e+09	1.84562e+09	2.20978e+09	1	1.98102e+09	1	2.25354e+09	1	1.83035e+09	1	1.11548	0.0119715	1.23121	0.00284852
Bo2g008990.1	Succinate--CoA ligase [ADP-forming] subunit alpha, mitochondrial	pep chromosome:v2.1:C2:1766315:1768190:1 gene:Bo2g008990 transcript:Bo2g008990.1 gene_biotype:protein_coding transcript_biotype:protein_coding description:Succinate--CoA ligase [ADP-forming] subunit alpha, mitochondrial :UniProtKB/TrEMBL;Acc:A0A0D3AI66]	37.6093	10	222	1	1	343	35.8	8.32	Not Found	Not Found	Not Found	Not Found	High	High	High	Not Found	High	High	High	High	4.484	640.34	10	NA	NA	NA	NA	6.76709e+07	5.31625e+07	7.26329e+07	NA	104372003	4.23053e+07	6.7636e+07	1.31285e+06	NA	0	6.04167e+07	0.666667	8.85024e+07	0.666667	3.70847e+07	1	NA	NA	2.38649	0.159448
Bo8g095470.1		pep chromosome:v2.1:C8:32641010:32643731:1 gene:Bo8g095470 transcript:Bo8g095470.1 gene_biotype:protein_coding transcript_biotype:protein_coding	27.3342	17	276	1	1	739	79.6	6.32	High	Not Found	High	High	High	High	High	High	High	High	High	High	1.319	636.86	17	3.84592e+07	NA	3.9091e+07	4.73316e+07	3.73544e+07	3.92209e+07	3.01746e+07	2.95138e+07	3.99547e+07	4.58617e+07	3.32206e+07	3.30189e+07	3.87751e+07	0.666667	4.13023e+07	1	3.32144e+07	1	3.73671e+07	1	0.938812	0.568786	0.888868	0.486708
Bo1g086100.1	glyoxal oxidase-related protein	pep chromosome:v2.1:C1:25117174:25118832:1 gene:Bo1g086100 transcript:Bo1g086100.1 gene_biotype:protein_coding transcript_biotype:protein_coding description:glyoxal oxidase-related protein :TAIR;Acc:AT3G57620](projected from arabidopsis_thaliana,AT3G57620)	32.2464	14	228	14	1	552	61.9	6.47	High	High	High	High	High	High	High	High	High	High	High	High	3.642	635.28	14	1.5234e+08	1.60076e+08	1.73888e+08	1.47554e+08	1.44324e+08	1.30469e+08	1.78074e+08	1.64085e+08	1.83284e+08	2.00907e+08	2.00953e+08	2.03017e+08	1.62101e+08	1	1.40783e+08	1	1.75148e+08	1	2.01626e+08	1	1.15143	0.0599847	0.868677	0.0101413
Bo8g081860.1		pep chromosome:v2.1:C8:27914761:27919540:-1 gene:Bo8g081860 transcript:Bo8g081860.1 gene_biotype:protein_coding transcript_biotype:protein_coding	20.0557	12	251	12	1	718	80.3	8.51	High	High	High	High	High	High	High	High	High	High	High	High	1.358	633.99	12	3.08428e+08	2.97292e+08	2.99192e+08	3.25783e+08	3.41753e+08	3.3346e+08	3.58129e+08	3.72408e+08	3.62974e+08	3.72305e+08	3.4762e+08	3.43212e+08	3.01638e+08	1	3.33665e+08	1	3.64504e+08	1	3.54379e+08	1	0.904013	0.00509866	1.02857	0.367551
Bo6g080950.1	Phosphoglycerate kinase	pep chromosome:v2.1:C6:24831261:24833203:1 gene:Bo6g080950 transcript:Bo6g080950.1 gene_biotype:protein_coding transcript_biotype:protein_coding description:Phosphoglycerate kinase :UniProtKB/TrEMBL;Acc:A0A0D3CVS9]	44.9591	15	262	2	1	367	38.7	5.53	High	High	High	High	High	High	High	High	High	High	Not Found	High	3.217	633.22	15	1.81702e+08	1.72052e+08	1.53552e+08	1.2425e+08	1.27396e+08	1.15498e+08	1.76439e+08	1.6655e+08	136984111	1.59098e+08	NA	1.62354e+08	1.69102e+08	1	1.22381e+08	1	1.59991e+08	1	1.60726e+08	0.666667	1.38177	0.00653839	0.99543	0.964843
Bo7g067790.1	DNA helicase	pep chromosome:v2.1:C7:26701058:26705190:-1 gene:Bo7g067790 transcript:Bo7g067790.1 gene_biotype:protein_coding transcript_biotype:protein_coding description:DNA helicase :UniProtKB/TrEMBL;Acc:A0A0D3D913]	40.4358	29	289	28	1	826	92.2	5.57	High	High	High	High	High	High	High	High	High	High	High	High	1.772	633.14	29	1.2331e+08	1.13686e+08	1.3438e+08	1.29537e+08	1.29235e+08	1.41509e+08	1.14514e+08	1.08596e+08	1.08932e+08	1.07017e+08	1.03172e+08	1.02099e+08	1.23792e+08	1	1.33427e+08	1	1.1068e+08	1	1.04096e+08	1	0.927788	0.252753	1.06325	0.0536545
Bo4g043800.1		pep chromosome:v2.1:C4:9777428:9781910:1 gene:Bo4g043800 transcript:Bo4g043800.1 gene_biotype:protein_coding transcript_biotype:protein_coding	39.4915	17	259	7	1	590	63.7	6.54	High	High	High	High	High	High	High	High	High	High	High	High	2.981	632.17	17	1.32037e+08	3.87188e+07	1.56096e+08	1.92621e+08	1.89051e+08	1.73178e+08	1.94011e+08	2.72095e+08	2.75806e+08	1.71911e+08	1.72526e+08	1.87061e+08	1.08951e+08	1	1.8495e+08	1	2.47304e+08	1	1.77166e+08	1	0.589082	0.104342	1.39589	0.0609482
Bo8g101480.1	MGP1 description	pep chromosome:v2.1:C8:35640490:35642434:1 gene:Bo8g101480 transcript:Bo8g101480.1 gene_biotype:protein_coding transcript_biotype:protein_coding gene_symbol:MGP1 description:copper ion binding;cobalt ion binding;zinc ion binding :TAIR;Acc:AT2G21870](projected from arabidopsis_thaliana,AT2G21870)	38.1743	14	258	3	1	241	27.7	9.07	High	High	High	High	High	High	High	High	High	High	High	High	3.262	631.47	14	5.41113e+08	4.77444e+08	2.46403e+08	2.51069e+08	2.44253e+08	2.27657e+08	3.1685e+08	4.62176e+08	5.03518e+08	2.89666e+08	2.60642e+08	5.36226e+08	4.21654e+08	1	2.40993e+08	1	4.27515e+08	1	3.62178e+08	1	1.74965	0.114567	1.1804	0.564475
Bo3g017110.1	Histone H2B	pep chromosome:v2.1:C3:5563197:5563625:-1 gene:Bo3g017110 transcript:Bo3g017110.1 gene_biotype:protein_coding transcript_biotype:protein_coding description:Histone H2B :UniProtKB/TrEMBL;Acc:A0A0D3B2D1]	53.5211	9	228	1	1	142	15.4	10.08	High	High	High	High	High	High	High	High	High	High	High	High	7.483	628.95	9	3.46252e+08	3.16872e+08	3.31822e+08	3.83781e+08	3.69103e+08	4.53383e+08	2.46462e+08	2.5721e+08	264075213	3.65329e+08	3.35137e+08	3.28425e+08	3.31649e+08	1	4.02089e+08	1	2.55916e+08	1	3.42964e+08	1	0.824814	0.0615784	0.746189	0.00220374
Bo1g050990.1		pep chromosome:v2.1:C1:14408431:14409457:1 gene:Bo1g050990 transcript:Bo1g050990.1 gene_biotype:protein_coding transcript_biotype:protein_coding	80.6122	24	299	19	1	294	33.4	5.17	High	High	High	High	High	High	High	High	High	High	High	High	9.857	628.05	24	2.59611e+08	2.48353e+08	3.01724e+08	3.4402e+08	3.58014e+08	3.56458e+08	3.08197e+08	3.18311e+08	2.97363e+08	2.74031e+08	3.18789e+08	3.3262e+08	2.69896e+08	1	3.52831e+08	1	3.07957e+08	1	3.0848e+08	1	0.764944	0.00789407	0.998305	0.979024
Bo6g107000.1		pep chromosome:v2.1:C6:33402341:33406238:-1 gene:Bo6g107000 transcript:Bo6g107000.1 gene_biotype:protein_coding transcript_biotype:protein_coding	26.7027	20	243	4	1	925	103.2	7.37	High	High	High	High	High	High	High	High	High	High	High	High	1.712	627.38	20	2.00006e+07	3.47847e+07	2.30862e+07	2.65723e+07	2.97448e+07	1.90061e+07	2.93727e+07	2.73848e+07	2.49183e+07	2.82217e+07	3.53353e+07	3.32573e+07	2.59572e+07	1	2.51077e+07	1	2.72253e+07	1	3.22715e+07	1	1.03383	0.885061	0.843633	0.110963
Bo5g022340.1		pep chromosome:v2.1:C5:8167724:8169830:-1 gene:Bo5g022340 transcript:Bo5g022340.1 gene_biotype:protein_coding transcript_biotype:protein_coding	37.4627	23	256	7	1	670	75.2	6.58	High	High	High	High	High	High	High	High	High	High	High	High	2.234	626.03	23	3.49382e+07	4.89765e+07	3.04924e+07	4.83212e+07	4.66126e+07	4.62635e+07	4.25141e+07	4.14467e+07	5.11849e+07	3.66567e+07	3.82509e+07	3.77255e+07	3.81357e+07	1	4.70658e+07	1	4.50486e+07	1	3.75444e+07	1	0.810264	0.186418	1.19988	0.0738809
Bo5g015310.1	CYP86C3 description	pep chromosome:v2.1:C5:5086898:5088481:1 gene:Bo5g015310 transcript:Bo5g015310.1 gene_biotype:protein_coding transcript_biotype:protein_coding gene_symbol:CYP86C3 description:cytochrome P450, family 86, subfamily C, polypeptide 3 :TAIR;Acc:AT1G13140](projected from arabidopsis_thaliana,AT1G13140)	40.797	23	257	17	1	527	60.9	7.43	High	High	High	High	High	High	High	High	High	High	High	High	3.348	624.66	23	2.1009e+08	2.14874e+08	2.02735e+08	1.75043e+08	1.65043e+08	1.90191e+08	1.77005e+08	1.82739e+08	1.73669e+08	2.01545e+08	2.03675e+08	2.02194e+08	2.09233e+08	1	1.76759e+08	1	1.77805e+08	1	2.02472e+08	1	1.18372	0.0161266	0.878171	0.00082254
Bo4g021020.1	Transducin/WD40 repeat-like superfamily protein	pep chromosome:v2.1:C4:2789164:2790147:-1 gene:Bo4g021020 transcript:Bo4g021020.1 gene_biotype:protein_coding transcript_biotype:protein_coding description:Transducin/WD40 repeat-like superfamily protein :TAIR;Acc:AT2G43770](projected from arabidopsis_thaliana,AT2G43770)	52.9052	15	226	15	1	327	36.3	7.11	High	High	High	High	High	High	High	High	High	High	High	High	4.055	622.93	15	2.17403e+08	2.12608e+08	2.00236e+08	2.2949e+08	2.29078e+08	2.24314e+08	2.20049e+08	2.53777e+08	2.58321e+08	1.87175e+08	1.77405e+08	1.93084e+08	2.10082e+08	1	2.27628e+08	1	2.44049e+08	1	1.85888e+08	1	0.922921	0.0309931	1.31288	0.0107753
Bo7g084340.1		pep chromosome:v2.1:C7:33103518:33105865:-1 gene:Bo7g084340 transcript:Bo7g084340.1 gene_biotype:protein_coding transcript_biotype:protein_coding	34.7578	8	197	8	1	351	38.4	6.6	High	High	High	High	High	High	High	High	High	High	High	High	2.34	621.5	8	3.20721e+08	3.71778e+08	3.28288e+08	3.97921e+08	4.06459e+08	3.98805e+08	4.73086e+08	4.7239e+08	3.97509e+08	4.68155e+08	5.67043e+08	5.16149e+08	3.40263e+08	1	4.01062e+08	1	4.47662e+08	1	5.17116e+08	1	0.848405	0.0196469	0.865689	0.141599
Bo1g008450.1	Aminopeptidase	pep chromosome:v2.1:C1:2977262:2981534:1 gene:Bo1g008450 transcript:Bo1g008450.1 gene_biotype:protein_coding transcript_biotype:protein_coding description:Aminopeptidase :UniProtKB/TrEMBL;Acc:A0A0D3A2B9]	35.7388	30	231	17	1	873	97.6	5.45	High	High	High	High	High	High	High	High	High	High	High	High	2.335	619.19	30	9.88162e+07	1.04474e+08	1.14352e+08	1.04168e+08	8.74049e+07	1.16421e+08	7.11454e+07	7.50634e+07	7.56748e+07	7.08974e+07	6.95306e+07	6.81187e+07	1.05881e+08	1	1.02665e+08	1	7.39612e+07	1	6.95156e+07	1	1.03133	0.753388	1.06395	0.0525834
Bo3g040070.1	Histone H2B	pep chromosome:v2.1:C3:16219458:16219913:-1 gene:Bo3g040070 transcript:Bo3g040070.1 gene_biotype:protein_coding transcript_biotype:protein_coding description:Histone H2B :UniProtKB/TrEMBL;Acc:A0A0D3B783]	50.3311	10	228	1	1	151	16.6	9.99	High	High	High	High	High	High	High	High	High	High	High	High	5.661	618.22	10	5.17474e+07	4.13593e+07	4.95493e+07	4.48776e+07	4.67766e+07	5.34521e+07	3.82911e+07	3.4928e+07	3.32558e+07	5.15147e+07	4.51678e+07	4.89114e+07	4.7552e+07	1	4.83688e+07	1	3.54916e+07	1	4.85313e+07	1	0.983114	0.851558	0.731314	0.00526735
Bo9g174530.1		pep chromosome:v2.1:C9:51600460:51602596:-1 gene:Bo9g174530 transcript:Bo9g174530.1 gene_biotype:protein_coding transcript_biotype:protein_coding	33.162	10	217	2	1	389	40.7	8.21	High	High	High	High	High	High	High	High	High	High	High	High	3.786	617.27	10	7.66532e+07	6.03464e+07	8.04529e+07	1.49341e+08	1.04057e+08	1.31604e+08	1.29114e+08	1.44111e+08	1.35834e+08	5.68607e+07	9.78579e+07	9.26166e+07	7.24841e+07	1	1.28334e+08	1	1.36353e+08	1	8.2445e+07	1	0.564808	0.0184674	1.65387	0.0165915
Bo9g004500.1	DNA helicase	pep chromosome:v2.1:C9:920905:924796:1 gene:Bo9g004500 transcript:Bo9g004500.1 gene_biotype:protein_coding transcript_biotype:protein_coding description:DNA helicase :UniProtKB/TrEMBL;Acc:A0A0D3DZZ3]	35.7823	23	259	1	1	735	82.2	6.05	Not Found	Not Found	High	Not Found	Not Found	Not Found	Not Found	Not Found	Not Found	Not Found	Not Found	Not Found	1.936	615.91	23	NA	NA	1.90122e+07	NA	NA	NA	NA	NA	NA	NA	NA	NA	1.90122e+07	0.333333	NA	0	NA	0	NA	0	NA	NA	NA	NA
Bo8g108290.1		pep chromosome:v2.1:C8:38578335:38580228:-1 gene:Bo8g108290 transcript:Bo8g108290.1 gene_biotype:protein_coding transcript_biotype:protein_coding	43.2671	19	267	18	1	453	50.9	6.81	High	High	High	High	High	High	High	High	High	High	High	High	2.008	615.64	19	2.12632e+08	2.24342e+08	2.28352e+08	2.51411e+08	2.36191e+08	2.49127e+08	2.87236e+08	2.57017e+08	2.62621e+08	2.61904e+08	2.55182e+08	2.71248e+08	2.21775e+08	1	2.45576e+08	1	2.68958e+08	1	2.62778e+08	1	0.90308	0.0235828	1.02352	0.583765
Bo4g068110.1		pep chromosome:v2.1:C4:14518075:14518830:1 gene:Bo4g068110 transcript:Bo4g068110.1 gene_biotype:protein_coding transcript_biotype:protein_coding	70.5179	12	215	12	1	251	27.2	8.02	High	High	High	High	High	High	High	High	High	High	High	High	11.743	614.47	12	5.28087e+08	5.08566e+08	5.05501e+08	2.22143e+08	2.14756e+08	2.08666e+08	3.62533e+08	3.49439e+08	3.85414e+08	4.03113e+08	3.89347e+08	3.62201e+08	5.14051e+08	1	2.15188e+08	1	3.65795e+08	1	3.84887e+08	1	2.38884	3.18293e-06	0.950397	0.297872
Bo4g148160.1	violaxanthin de-epoxidase-related	pep chromosome:v2.1:C4:40110246:40113390:-1 gene:Bo4g148160 transcript:Bo4g148160.1 gene_biotype:protein_coding transcript_biotype:protein_coding description:violaxanthin de-epoxidase-related :TAIR;Acc:AT2G21860](projected from arabidopsis_thaliana,AT2G21860)	12.5512	14	251	3	1	733	83.5	8.43	High	High	High	High	High	High	High	High	High	High	High	High	0.778	614.24	14	1.94972e+08	2.97171e+08	2.98369e+08	3.02054e+08	3.03965e+08	3.11924e+08	2.58632e+08	2.78839e+08	2.92091e+08	3.08353e+08	3.1015e+08	3.22173e+08	2.63504e+08	1	3.05981e+08	1	2.76521e+08	1	3.13559e+08	1	0.861178	0.284493	0.881879	0.0254174
Bo4g096810.1		pep chromosome:v2.1:C4:24108148:24114343:-1 gene:Bo4g096810 transcript:Bo4g096810.1 gene_biotype:protein_coding transcript_biotype:protein_coding	33.1693	29	248	29	1	1016	113.7	5.88	High	High	High	High	High	High	High	High	High	High	High	High	1.498	611.05	29	9.39572e+07	1.02693e+08	1.05562e+08	1.08553e+08	1.07477e+08	1.09428e+08	8.72743e+07	8.77008e+07	9.36657e+07	9.8531e+07	8.31557e+07	1.03179e+08	1.00737e+08	1	1.08486e+08	1	8.9547e+07	1	9.49552e+07	1	0.928573	0.0934889	0.943045	0.445179
Bo8g113990.1		pep chromosome:v2.1:C8:40118115:40122557:-1 gene:Bo8g113990 transcript:Bo8g113990.1 gene_biotype:protein_coding transcript_biotype:protein_coding	25.1403	20	225	2	1	891	98.2	5.74	High	Not Found	High	High	High	High	Not Found	High	High	High	High	High	1.438	610.37	20	NA	NA	2.68332e+07	NA	7.4107e+07	NA	NA	3.8138e+07	9.09579e+06	NA	1.78209e+07	1.72817e+07	2.68332e+07	0.333333	7.4107e+07	0.333333	2.36169e+07	0.666667	1.75513e+07	0.666667	0.362087	NA	1.34559	0.716778
Bo9g159870.1		pep chromosome:v2.1:C9:47152506:47154242:1 gene:Bo9g159870 transcript:Bo9g159870.1 gene_biotype:protein_coding transcript_biotype:protein_coding	64.3137	12	200	3	1	255	28.5	8.38	Not Found	Not Found	High	Not Found	Not Found	Not Found	High	High	High	High	High	High	9	609.47	12	NA	NA	6.85033e+07	NA	NA	NA	3.86927e+07	5.06648e+07	6.74309e+07	7.76173e+07	6.8718e+07	3.7526e+07	6.85033e+07	0.333333	NA	0	5.22628e+07	1	6.12871e+07	1	NA	NA	0.852754	0.573428
Bo9g148120.1	H2B description	pep chromosome:v2.1:C9:43807896:43808321:1 gene:Bo9g148120 transcript:Bo9g148120.1 gene_biotype:protein_coding transcript_biotype:protein_coding gene_symbol:H2B description:Histone H2B :UniProtKB/TrEMBL;Acc:A0A0D3EDA3]	62.4113	10	221	2	1	141	15.3	10.08	High	High	Not Found	High	Not Found	High	High	High	High	Not Found	High	Not Found	9	609.07	10	9.67905e+06	3.13493e+07	NA	9.70829e+07	NA	1.13316e+08	1.05008e+08	6.79822e+07	1.28176e+08	NA	4.9044e+07	NA	2.05142e+07	0.666667	1.05199e+08	0.666667	1.00388e+08	1	4.9044e+07	0.333333	0.195003	0.0246162	2.04691	NA
Bo4g024930.1		pep chromosome:v2.1:C4:4063745:4066756:1 gene:Bo4g024930 transcript:Bo4g024930.1 gene_biotype:protein_coding transcript_biotype:protein_coding	34.5238	19	239	7	1	672	77	7.46	High	High	High	High	High	High	High	High	High	High	High	High	1.593	608.71	19	1.56218e+08	1.49252e+08	1.55527e+08	1.88189e+08	1.83229e+08	1.68881e+08	1.37711e+08	1.4111e+08	1.41642e+08	1.13444e+08	1.17912e+08	1.19078e+08	1.53666e+08	1	1.801e+08	1	1.40155e+08	1	1.16811e+08	1	0.853227	0.0130071	1.19984	0.000381504
Bo6g104050.1	Signal recognition particle subunit SRP72	pep chromosome:v2.1:C6:32675195:32677913:-1 gene:Bo6g104050 transcript:Bo6g104050.1 gene_biotype:protein_coding transcript_biotype:protein_coding description:Signal recognition particle subunit SRP72 :UniProtKB/TrEMBL;Acc:A0A0D3CYQ2]	28.9394	18	239	18	1	660	72.5	9.06	High	High	High	High	High	High	High	High	High	High	High	High	1.947	607.78	18	1.39428e+08	1.39971e+08	1.42612e+08	1.48938e+08	1.37128e+08	1.46456e+08	1.77739e+08	1.75436e+08	1.63724e+08	1.38529e+08	1.3632e+08	1.38432e+08	1.4067e+08	1	1.44174e+08	1	1.723e+08	1	1.3776e+08	1	0.975697	0.400399	1.25072	0.00142089
Bo8g015090.1		pep chromosome:v2.1:C8:2992460:2997539:1 gene:Bo8g015090 transcript:Bo8g015090.1 gene_biotype:protein_coding transcript_biotype:protein_coding	23.8863	22	283	4	1	1055	116.7	9.39	High	High	High	High	High	High	High	High	High	High	High	High	1.135	607.75	22	8.20344e+07	4.36211e+07	4.91402e+07	2.94873e+07	5.15928e+07	1.57251e+07	4.53916e+07	5.64764e+07	4.33364e+07	5.24186e+07	3.64231e+07	2.63732e+07	5.82652e+07	1	3.22684e+07	1	4.84015e+07	1	3.8405e+07	1	1.80564	0.17746	1.26029	0.310289
Bo5g043380.1		pep chromosome:v2.1:C5:14527936:14532847:1 gene:Bo5g043380 transcript:Bo5g043380.1 gene_biotype:protein_coding transcript_biotype:protein_coding	34.1849	28	266	28	1	822	94.2	6.67	High	High	High	High	High	High	High	High	High	High	High	High	2.065	605.48	28	1.53686e+08	1.3341e+08	1.40848e+08	1.48777e+08	1.60067e+08	1.42809e+08	1.14847e+08	1.19979e+08	1.20858e+08	1.07145e+08	1.03533e+08	9.64487e+07	1.42648e+08	1	1.50551e+08	1	1.18561e+08	1	1.02376e+08	1	0.947507	0.367699	1.1581	0.0114692
Bo5g023670.1		pep chromosome:v2.1:C5:8379158:8382166:1 gene:Bo5g023670 transcript:Bo5g023670.1 gene_biotype:protein_coding transcript_biotype:protein_coding	35.5556	17	235	6	1	540	59.5	6.7	High	High	High	High	High	High	High	High	High	High	High	High	2.548	603.87	17	1.38257e+08	1.3616e+08	9.74811e+07	1.42739e+08	1.47416e+08	1.5052e+08	1.12082e+08	1.30184e+08	1.24259e+08	1.59524e+08	1.13984e+08	1.57661e+08	1.23966e+08	1	1.46892e+08	1	1.22175e+08	1	1.43723e+08	1	0.84393	0.163441	0.850072	0.244448
Bo1g139700.1	Fatty acyl-CoA reductase	pep chromosome:v2.1:C1:40035497:40038096:-1 gene:Bo1g139700 transcript:Bo1g139700.1 gene_biotype:protein_coding transcript_biotype:protein_coding description:Fatty acyl-CoA reductase :UniProtKB/TrEMBL;Acc:A0A0D3AED4]	37.5	20	239	5	1	616	68.4	8.15	High	High	High	High	High	High	High	High	High	High	High	High	2.234	602.98	20	4.63295e+07	4.58498e+07	9.22723e+07	1.59167e+08	2.08261e+08	2.0836e+08	2.8508e+07	4.97433e+07	5.41481e+07	4.68159e+07	4.57256e+07	4.03103e+07	6.14839e+07	1	1.91929e+08	1	4.41331e+07	1	4.42839e+07	1	0.320346	0.00438695	0.996595	0.986154
Bo2g007060.1		pep chromosome:v2.1:C2:1242019:1244011:1 gene:Bo2g007060 transcript:Bo2g007060.1 gene_biotype:protein_coding transcript_biotype:protein_coding	38.3117	11	232	3	1	308	34.7	6.65	High	High	High	High	High	High	High	High	High	High	High	High	3.365	602.83	11	1.01573e+08	1.40669e+08	1.32294e+08	2.20369e+08	1.57901e+08	1.49731e+08	1.24433e+08	1.13486e+08	115973242	1.12349e+08	1.07371e+08	1.01671e+08	1.24846e+08	1	1.76001e+08	1	1.17964e+08	1	1.0713e+08	1	0.709348	0.113017	1.10113	0.0749109
Bo4g130770.1		pep chromosome:v2.1:C4:33677717:33683023:1 gene:Bo4g130770 transcript:Bo4g130770.1 gene_biotype:protein_coding transcript_biotype:protein_coding	44.5707	26	240	26	1	792	89.2	6.57	High	High	High	High	High	High	High	High	High	High	High	High	2.511	602.2	26	1.56744e+08	1.32923e+08	1.4924e+08	1.68779e+08	1.73335e+08	1.59512e+08	1.29927e+08	1.35382e+08	1.30672e+08	1.32293e+08	1.27213e+08	1.24907e+08	1.46303e+08	1	1.67209e+08	1	1.31994e+08	1	1.28138e+08	1	0.874969	0.0617366	1.03009	0.236394
Bo9g031000.1		pep chromosome:v2.1:C9:10794293:10795530:1 gene:Bo9g031000 transcript:Bo9g031000.1 gene_biotype:protein_coding transcript_biotype:protein_coding	69.2884	15	223	15	1	267	30.7	4.91	High	High	High	High	High	High	High	High	High	High	High	High	7.962	600.75	15	2.95462e+08	2.98489e+08	2.87506e+08	2.85282e+08	3.0004e+08	2.95884e+08	2.65054e+08	2.6152e+08	2.72135e+08	2.52002e+08	2.65553e+08	2.47606e+08	2.93819e+08	1	2.93735e+08	1	2.66236e+08	1	2.55054e+08	1	1.00029	0.988523	1.04384	0.147474
Bo4g024280.1	Elongation factor G, mitochondrial	pep chromosome:v2.1:C4:3673917:3678801:1 gene:Bo4g024280 transcript:Bo4g024280.1 gene_biotype:protein_coding transcript_biotype:protein_coding description:Elongation factor G, mitochondrial :UniProtKB/TrEMBL;Acc:A0A0D3BQ00]	33.0688	22	288	22	1	756	83.5	6.6	High	High	High	High	High	High	High	High	High	High	High	High	2.444	599.03	22	1.92463e+08	1.81374e+08	1.68235e+08	1.60723e+08	1.65833e+08	1.56284e+08	1.87594e+08	1.99637e+08	2.02078e+08	1.69317e+08	1.7226e+08	1.70603e+08	1.80691e+08	1	1.60947e+08	1	1.96436e+08	1	1.70727e+08	1	1.12268	0.0585896	1.15059	0.00486064
Bo01443s010.1	GDSL-like Lipase/Acylhydrolase superfamily protein	pep scaffold:v2.1:Scaffold01443:2853:5020:1 gene:Bo01443s010 transcript:Bo01443s010.1 gene_biotype:protein_coding transcript_biotype:protein_coding description:GDSL-like Lipase/Acylhydrolase superfamily protein :TAIR;Acc:AT1G20132](projected from arabidopsis_thaliana,AT1G20132)	36.1446	11	189	11	1	415	46.7	8.7	High	High	High	High	High	High	High	High	High	High	High	High	3.786	599.01	11	6.95923e+08	7.99969e+08	7.09632e+08	3.4238e+08	3.32025e+08	2.39663e+08	4.74202e+08	4.07483e+08	4.22542e+08	6.3772e+08	6.00414e+08	5.8822e+08	7.35175e+08	1	3.04689e+08	1	4.34743e+08	1	6.08785e+08	1	2.41287	0.000736229	0.714115	0.00227036
Bo5g092980.1		pep chromosome:v2.1:C5:30055741:30057978:1 gene:Bo5g092980 transcript:Bo5g092980.1 gene_biotype:protein_coding transcript_biotype:protein_coding	18.255	12	224	9	1	745	80.9	8.18	High	High	High	High	High	High	High	High	High	High	High	High	1.089	597.95	12	1.16943e+08	1.33885e+08	1.20576e+08	1.37817e+08	1.30367e+08	1.30196e+08	1.39267e+08	1.28229e+08	1.34899e+08	1.2913e+08	1.19304e+08	1.18836e+08	1.23801e+08	1	1.32793e+08	1	1.34132e+08	1	1.22423e+08	1	0.932289	0.19168	1.09564	0.0652598
Bo1g150530.1		pep chromosome:v2.1:C1:42323745:42324216:-1 gene:Bo1g150530 transcript:Bo1g150530.1 gene_biotype:protein_coding transcript_biotype:protein_coding	55.6452	7	198	1	1	124	14.1	9.55	High	High	High	High	High	High	High	High	High	High	High	High	6.017	597.27	7	2.59807e+09	2.65462e+09	2.53274e+09	2.01164e+09	2.06563e+09	2.15107e+09	2.31101e+09	2.21425e+09	2283953966	2.47073e+09	2.48714e+09	2.60924e+09	2.59515e+09	1	2.07611e+09	1	2.26974e+09	1	2.52237e+09	1	1.25	0.000642719	0.899845	0.00848408
Bo3g107680.1		pep chromosome:v2.1:C3:38151550:38152285:-1 gene:Bo3g107680 transcript:Bo3g107680.1 gene_biotype:protein_coding transcript_biotype:protein_coding	35.2518	8	245	2	1	139	15.5	9.86	High	High	High	High	High	High	High	High	High	High	High	High	9	597.2	8	3.54308e+08	3.3417e+08	3.40687e+08	3.46989e+08	3.513e+08	3.3472e+08	3.85309e+08	4.04032e+08	3.69654e+08	3.69072e+08	3.38558e+08	3.57511e+08	3.43055e+08	1	3.44336e+08	1	3.86332e+08	1	3.55047e+08	1	0.996279	0.876498	1.08811	0.0788711
Bo6g122120.1	RHM1 description	pep chromosome:v2.1:C6:38940039:38942519:1 gene:Bo6g122120 transcript:Bo6g122120.1 gene_biotype:protein_coding transcript_biotype:protein_coding gene_symbol:RHM1 description:rhamnose biosynthesis 1 :TAIR;Acc:AT1G78570](projected from arabidopsis_thaliana,AT1G78570)	39.8507	22	249	5	1	670	75.3	7.28	Not Found	High	High	High	High	High	Not Found	Not Found	Not Found	Not Found	Not Found	High	1.904	596.65	22	NA	2.06549e+07	3.93256e+07	2.49888e+07	3.48591e+07	3.58461e+07	NA	NA	NA	NA	NA	2.20816e+07	2.99903e+07	0.666667	3.1898e+07	1	NA	0	2.20816e+07	0.333333	0.940193	0.832457	NA	NA
Bo5g138140.1	HEN2 description	pep chromosome:v2.1:C5:43221720:43226356:-1 gene:Bo5g138140 transcript:Bo5g138140.1 gene_biotype:protein_coding transcript_biotype:protein_coding gene_symbol:HEN2 description:RNA helicase, ATP-dependent, SK12/DOB1 protein :TAIR;Acc:AT2G06990](projected from arabidopsis_thaliana,AT2G06990)	29.0616	26	247	25	1	991	111.2	6.74	High	High	High	High	High	High	High	High	High	High	High	High	1.754	595.59	26	8.25116e+07	8.61852e+07	1.10011e+08	9.84926e+07	7.84664e+07	1.5981e+08	9.75634e+07	1.09073e+08	1.0648e+08	9.35846e+07	1.05004e+08	1.05011e+08	9.29026e+07	1	1.12256e+08	1	1.04372e+08	1	1.012e+08	1	0.827594	0.497124	1.03135	0.572104
Bo3g023640.1		pep chromosome:v2.1:C3:8611697:8612442:-1 gene:Bo3g023640 transcript:Bo3g023640.1 gene_biotype:protein_coding transcript_biotype:protein_coding	39.8374	8	254	1	1	123	13.8	9.72	High	High	High	High	High	High	High	High	High	High	High	High	11.115	595.43	8	1.39503e+09	1.28864e+09	1.27895e+09	1.19126e+09	1.19197e+09	1.16494e+09	1.20422e+09	1.16631e+09	1206449202	1.27263e+09	1.08534e+09	1.13596e+09	1.32087e+09	1	1.18272e+09	1	1.19233e+09	1	1.16464e+09	1	1.11681	0.0224864	1.02377	0.654965
Bo4g038650.1	Phosphoribosyltransferase family protein	pep chromosome:v2.1:C4:8259935:8262387:1 gene:Bo4g038650 transcript:Bo4g038650.1 gene_biotype:protein_coding transcript_biotype:protein_coding description:Phosphoribosyltransferase family protein :TAIR;Acc:AT2G35390](projected from arabidopsis_thaliana,AT2G35390)	30.3258	11	190	3	1	399	43.1	7.39	Not Found	Not Found	Not Found	High	High	Not Found	High	Not Found	Not Found	High	High	High	2.594	595.4	11	NA	NA	NA	1.78348e+07	2.01822e+07	NA	6.06054e+06	NA	NA	2.30133e+07	2.23337e+07	7.42124e+06	NA	0	1.90085e+07	0.666667	6.06054e+06	0.333333	1.75894e+07	1	NA	NA	0.344557	NA
Bo1g017450.1		pep chromosome:v2.1:C1:6047130:6050144:1 gene:Bo1g017450 transcript:Bo1g017450.1 gene_biotype:protein_coding transcript_biotype:protein_coding	39.5122	17	242	1	1	410	46.2	4.98	High	High	High	High	High	High	High	High	High	High	High	High	3.252	595.23	17	1.34446e+08	1.3228e+08	1.32553e+08	1.62435e+08	1.54541e+08	1.64744e+08	1.55182e+08	1.49296e+08	150927801	1.10435e+08	1.1768e+08	1.08095e+08	1.33093e+08	1	1.60573e+08	1	1.51802e+08	1	1.1207e+08	1	0.828862	0.000966437	1.35452	0.000298532
Bo7g014940.1	IDH2 description	pep chromosome:v2.1:C7:5764445:5766318:1 gene:Bo7g014940 transcript:Bo7g014940.1 gene_biotype:protein_coding transcript_biotype:protein_coding gene_symbol:IDH2 description:isocitrate dehydrogenase subunit 2 :TAIR;Acc:AT2G17130](projected from arabidopsis_thaliana,AT2G17130)	29.8913	8	209	4	1	368	39.8	7.06	High	High	High	High	High	High	High	High	High	High	High	High	2.675	594.86	8	5.21514e+07	5.71159e+07	7.46571e+07	9.51299e+07	9.98479e+07	9.05401e+07	4.42753e+07	4.2331e+07	9.74493e+07	3.78865e+07	4.59153e+07	4.10237e+07	6.13081e+07	1	9.51727e+07	1	6.13519e+07	1	4.16085e+07	1	0.644178	0.00991109	1.4745	0.339204
Bo8g079380.1	Casein kinase II subunit alpha-1	pep chromosome:v2.1:C8:26335368:26337431:1 gene:Bo8g079380 transcript:Bo8g079380.1 gene_biotype:protein_coding transcript_biotype:protein_coding description:Casein kinase II subunit alpha-1 :Projected from Arabidopsis thaliana (AT5G67380) UniProtKB/Swiss-Prot;Acc:Q08467]	42.8198	14	211	3	1	383	44.6	7.77	High	High	High	High	High	High	High	High	High	High	High	High	4.012	594.84	14	2.55567e+07	2.17045e+07	1.93672e+07	2.26986e+07	3.87324e+07	2.05075e+07	2.75737e+07	3.46411e+07	3.8192e+07	3.00629e+07	2.29284e+07	3.2392e+07	2.22095e+07	1	2.73128e+07	1	3.3469e+07	1	2.84611e+07	1	0.813152	0.444436	1.17595	0.301426
Bo2g074010.1	Polyadenylate-binding protein	pep chromosome:v2.1:C2:20764328:20766860:-1 gene:Bo2g074010 transcript:Bo2g074010.1 gene_biotype:protein_coding transcript_biotype:protein_coding description:Polyadenylate-binding protein :UniProtKB/TrEMBL;Acc:A0A0D3APW0]	37.6344	23	243	18	1	651	71.5	9.11	High	High	High	High	High	High	High	High	High	High	High	High	2.234	592.5	23	1.6084e+08	1.65006e+08	1.72228e+08	1.8964e+08	1.82913e+08	1.76171e+08	2.24899e+08	2.05948e+08	2.23306e+08	1.73798e+08	1.52922e+08	1.63404e+08	1.66025e+08	1	1.82908e+08	1	2.18051e+08	1	1.63375e+08	1	0.907697	0.0299497	1.33467	0.00307371
Bo2g025250.1	HTB4 description	pep chromosome:v2.1:C2:7568292:7568720:-1 gene:Bo2g025250 transcript:Bo2g025250.1 gene_biotype:protein_coding transcript_biotype:protein_coding gene_symbol:HTB4 description:Histone H2B :UniProtKB/TrEMBL;Acc:A0A0D3AKU9]	51.4085	9	214	1	1	142	15.4	10.02	Not Found	Not Found	Not Found	Not Found	Not Found	Not Found	Not Found	Not Found	Not Found	Not Found	High	Not Found	6.356	591.71	9	NA	NA	NA	NA	NA	NA	NA	NA	NA	NA	594434	NA	NA	0	NA	0	NA	0	594434	0.333333	NA	NA	NA	NA
Bo9g140940.1	Histone H2B	pep chromosome:v2.1:C9:42865074:42865526:1 gene:Bo9g140940 transcript:Bo9g140940.1 gene_biotype:protein_coding transcript_biotype:protein_coding description:Histone H2B :UniProtKB/TrEMBL;Acc:A0A0D3ECX9]	50	9	214	1	1	150	16.4	9.99	Not Found	Not Found	Not Found	Not Found	High	Not Found	Not Found	Not Found	Not Found	Not Found	Not Found	Not Found	5.494	591.71	9	NA	NA	NA	NA	288191	NA	NA	NA	NA	NA	NA	NA	NA	0	288191	0.333333	NA	0	NA	0	NA	NA	NA	NA
Bo6g015550.1		pep chromosome:v2.1:C6:3031901:3033129:-1 gene:Bo6g015550 transcript:Bo6g015550.1 gene_biotype:protein_coding transcript_biotype:protein_coding	54.4073	17	279	7	1	329	35.7	6.64	High	High	High	High	High	High	High	High	High	High	High	High	5.918	591.39	17	8.80269e+07	9.49131e+07	8.89123e+07	7.59167e+07	7.70735e+07	7.60725e+07	8.60841e+07	8.25634e+07	8.8705e+07	9.31298e+07	9.52354e+07	8.98719e+07	9.06175e+07	1	7.63542e+07	1	8.57841e+07	1	9.27457e+07	1	1.1868	0.00288421	0.924939	0.042312
Bo2g009830.1	40S ribosomal protein S6	pep chromosome:v2.1:C2:2150472:2151531:-1 gene:Bo2g009830 transcript:Bo2g009830.1 gene_biotype:protein_coding transcript_biotype:protein_coding description:40S ribosomal protein S6 :UniProtKB/TrEMBL;Acc:A0A0D3B0G9]	45.7831	13	249	1	1	249	28.2	10.65	Not Found	Not Found	Not Found	Not Found	Not Found	Not Found	High	High	High	High	Not Found	Not Found	3.786	591.26	13	NA	NA	NA	NA	NA	NA	3.80691e+07	3.16066e+07	3.60351e+07	2.89602e+07	NA	NA	NA	0	NA	0	3.52369e+07	1	2.89602e+07	0.333333	NA	NA	1.21674	NA
Bo7g092700.1		pep chromosome:v2.1:C7:35420162:35424327:-1 gene:Bo7g092700 transcript:Bo7g092700.1 gene_biotype:protein_coding transcript_biotype:protein_coding	34.2569	21	208	11	1	794	86.2	9.07	High	High	High	High	High	High	High	High	High	High	High	High	1.653	590.96	21	4.57193e+07	5.63634e+07	5.54445e+07	5.79048e+07	5.96564e+07	5.63001e+07	1.18235e+08	1.22905e+08	1.3722e+08	1.39222e+08	1.49516e+08	1.36506e+08	5.25091e+07	1	5.79537e+07	1	1.2612e+08	1	1.41748e+08	1	0.906051	0.19891	0.889747	0.0878107
Bo00615s210.1		pep scaffold:v2.1:Scaffold00615:131918:132935:1 gene:Bo00615s210 transcript:Bo00615s210.1 gene_biotype:protein_coding transcript_biotype:protein_coding	49.1228	12	260	11	1	285	30.9	8.92	High	High	High	High	High	High	High	High	High	High	High	High	11.589	590.27	12	2.95855e+08	2.82446e+08	2.86534e+08	1.83753e+08	1.78729e+08	2.02397e+08	2.54063e+08	2.44583e+08	2.40013e+08	2.96226e+08	2.76374e+08	2.6829e+08	2.88278e+08	1	1.88293e+08	1	2.4622e+08	1	2.80296e+08	1	1.53101	0.000262252	0.878426	0.0213056
Bo6g116440.1		pep chromosome:v2.1:C6:36400973:36402816:-1 gene:Bo6g116440 transcript:Bo6g116440.1 gene_biotype:protein_coding transcript_biotype:protein_coding	31.1031	16	253	3	1	553	61	8.88	High	High	High	High	High	High	High	High	High	High	High	High	2.262	587.7	16	1.61049e+08	1.59194e+08	1.56264e+08	1.54053e+08	1.18425e+08	1.27378e+08	1.12699e+08	1.28181e+08	1.22451e+08	1.43568e+08	1.31345e+08	1.2707e+08	1.58836e+08	1	1.33285e+08	1	1.2111e+08	1	1.33994e+08	1	1.1917	0.077005	0.903848	0.126752
Bo9g033910.1		pep chromosome:v2.1:C9:11547596:11549059:1 gene:Bo9g033910 transcript:Bo9g033910.1 gene_biotype:protein_coding transcript_biotype:protein_coding	38.7409	16	240	12	1	413	46.3	8.57	High	High	High	High	High	High	High	High	High	High	High	High	3.417	585.67	16	1.20588e+09	1.1469e+09	1.1186e+09	1.1135e+09	1.093e+09	1.07192e+09	1.05705e+09	1.06419e+09	1040159999	1.05013e+09	9.69263e+08	1.00281e+09	1.15713e+09	1	1.09281e+09	1	1.0538e+09	1	1.0074e+09	1	1.05886	0.0860085	1.04606	0.131353
Bo6g055850.1	unknown protein; BEST Arabidopsis thaliana protein match is	pep chromosome:v2.1:C6:14730051:14731895:1 gene:Bo6g055850 transcript:Bo6g055850.1 gene_biotype:protein_coding transcript_biotype:protein_coding description:unknown protein; BEST Arabidopsis thaliana protein match is: unknown protein (TAIR:AT3G22520.1); Has 1681 Blast hits to 1532 proteins in 283 species: Archae - 19; Bacteria - 179; Metazoa - 579; Fungi - 131; Plants - 223; Viruses - 5; Other Eu…	28.9425	17	261	10	1	539	60.5	6.13	High	High	High	High	High	High	High	High	High	High	High	High	2.162	585.49	17	1.17654e+08	1.19695e+08	1.22691e+08	1.15511e+08	1.2728e+08	1.28062e+08	1.88271e+08	1.8245e+08	1.94438e+08	1.68716e+08	2.0676e+08	1.69127e+08	1.20013e+08	1	1.23618e+08	1	1.88387e+08	1	1.81534e+08	1	0.970843	0.450563	1.03775	0.628041
Bo4g161220.1	Proteasome subunit alpha type	pep chromosome:v2.1:C4:43596444:43598132:-1 gene:Bo4g161220 transcript:Bo4g161220.1 gene_biotype:protein_coding transcript_biotype:protein_coding description:Proteasome subunit alpha type :UniProtKB/TrEMBL;Acc:A0A0D3C289]	43.3735	10	214	10	1	249	27.3	6.55	High	High	High	High	High	High	High	High	High	High	High	High	2.162	585.19	10	6.91237e+08	7.05292e+08	6.51019e+08	7.45356e+08	7.3469e+08	7.79013e+08	6.55478e+08	6.46415e+08	6.43889e+08	8.15988e+08	7.4453e+08	7.81019e+08	6.82516e+08	1	7.5302e+08	1	6.48594e+08	1	7.80512e+08	1	0.906372	0.0285643	0.830985	0.00323764
Bo5g148200.1		pep chromosome:v2.1:C5:45614235:45618049:-1 gene:Bo5g148200 transcript:Bo5g148200.1 gene_biotype:protein_coding transcript_biotype:protein_coding	14.4492	9	254	9	1	699	78.2	8.29	High	High	High	High	High	High	High	High	High	High	High	High	0.778	583.39	9	2.50315e+09	2.48302e+09	2.44883e+09	2.18774e+09	2.20986e+09	2.29817e+09	2.48577e+09	2.44331e+09	2424033541	2.10415e+09	1.96741e+09	2.02971e+09	2.47833e+09	1	2.23192e+09	1	2.45104e+09	1	2.03376e+09	1	1.1104	0.00271387	1.20518	0.000661742
Bo9g163490.1		pep chromosome:v2.1:C9:48094463:48097575:1 gene:Bo9g163490 transcript:Bo9g163490.1 gene_biotype:protein_coding transcript_biotype:protein_coding	23.062	12	212	7	1	516	56.9	4.79	High	High	High	High	High	High	High	High	High	High	High	High	2.275	582.2	12	1.6574e+08	1.65698e+08	1.72744e+08	1.40404e+08	1.88212e+08	1.83882e+08	1.9425e+08	1.94263e+08	2.00993e+08	2.34254e+08	2.60022e+08	2.4821e+08	1.68061e+08	1	1.70833e+08	1	1.96502e+08	1	2.47495e+08	1	0.983773	0.866279	0.793962	0.00279969
Bo7g082710.1		pep chromosome:v2.1:C7:32713024:32717025:-1 gene:Bo7g082710 transcript:Bo7g082710.1 gene_biotype:protein_coding transcript_biotype:protein_coding	28.6318	32	262	16	1	1184	135.1	7.06	High	High	High	High	High	High	High	High	High	High	High	High	1.438	581.78	32	7.42206e+07	9.85293e+07	9.79159e+07	1.00235e+08	7.99676e+07	9.99168e+07	1.18753e+08	1.18645e+08	1.24141e+08	8.08718e+07	1.02613e+08	7.82973e+07	9.02219e+07	1	9.33731e+07	1	1.20513e+08	1	8.72606e+07	1	0.966251	0.7778	1.38107	0.0137262
Bo6g039710.1		pep chromosome:v2.1:C6:9785307:9793758:-1 gene:Bo6g039710 transcript:Bo6g039710.1 gene_biotype:protein_coding transcript_biotype:protein_coding	23.74	29	255	8	1	1369	151	5.07	High	High	High	High	High	High	High	High	High	High	High	High	1.171	581.36	29	3.91837e+07	3.3373e+07	2.19236e+07	3.9521e+07	4.77693e+07	4.80814e+07	3.54805e+07	4.4265e+07	4.54463e+07	4.63135e+07	1.38807e+07	3.66115e+07	3.14934e+07	1	4.51239e+07	1	4.17306e+07	1	3.22686e+07	1	0.697932	0.078284	1.29323	0.402396
Bo6g026480.1		pep chromosome:v2.1:C6:6032555:6036113:-1 gene:Bo6g026480 transcript:Bo6g026480.1 gene_biotype:protein_coding transcript_biotype:protein_coding	37.251	27	215	25	1	1004	105.5	5.67	High	High	High	High	High	High	High	High	High	High	High	High	1.482	580.52	27	1.37713e+08	1.38157e+08	1.37571e+08	1.26404e+08	1.27605e+08	1.27488e+08	8.26116e+07	7.15402e+07	7.19764e+07	1.28546e+08	1.20052e+08	1.28784e+08	1.37814e+08	1	1.27166e+08	1	7.53761e+07	1	1.25794e+08	1	1.08373	1.45471e-05	0.599203	0.000400591
Bo1g090180.1		pep chromosome:v2.1:C1:26513031:26514272:-1 gene:Bo1g090180 transcript:Bo1g090180.1 gene_biotype:protein_coding transcript_biotype:protein_coding	41.6667	14	275	2	1	276	30	10.15	High	High	High	High	High	Not Found	High	High	Not Found	High	High	High	2.398	580.45	14	2.85867e+07	3.27555e+07	2.63846e+07	2.37728e+07	2.35222e+07	NA	2.74293e+07	2.38763e+07	NA	1.89177e+07	2.17394e+07	2.10417e+07	2.92422e+07	1	2.36475e+07	0.666667	2.56528e+07	0.666667	2.05662e+07	1	1.23659	0.103266	1.24733	0.0595506
Bo5g009630.1		pep chromosome:v2.1:C5:3549007:3552040:-1 gene:Bo5g009630 transcript:Bo5g009630.1 gene_biotype:protein_coding transcript_biotype:protein_coding	39.738	20	257	4	1	458	51.8	4.59	High	High	High	High	High	High	High	High	High	High	High	High	3.541	580.42	20	7.36093e+07	8.98402e+07	9.31071e+07	1.05301e+08	1.03079e+08	9.67479e+07	5.63989e+07	5.2404e+07	5.02619e+07	8.51975e+07	1.41555e+08	8.98361e+07	8.55189e+07	1	1.01709e+08	1	5.30216e+07	1	1.0553e+08	1	0.840816	0.0688358	0.502434	0.0444411
Bo4g191620.1	Copper amine oxidase family protein	pep chromosome:v2.1:C4:51883850:51887606:-1 gene:Bo4g191620 transcript:Bo4g191620.1 gene_biotype:protein_coding transcript_biotype:protein_coding description:Copper amine oxidase family protein :Projected from Arabidopsis thaliana (AT2G42490) TAIR;Acc:AT2G42490]	34.2784	23	289	7	1	776	86.5	6.86	High	High	High	High	High	High	High	High	High	High	High	High	1.878	579.79	23	4.96375e+07	4.72048e+07	4.04717e+07	5.58125e+07	5.36307e+07	4.85178e+07	6.00431e+07	7.90755e+07	6.91998e+07	8.87007e+07	5.49645e+07	9.05841e+07	4.57713e+07	1	5.26537e+07	1	6.94395e+07	1	7.80831e+07	1	0.86929	0.119977	0.889302	0.536842
Bo9g172220.1	40S ribosomal protein S6	pep chromosome:v2.1:C9:50931303:50932695:1 gene:Bo9g172220 transcript:Bo9g172220.1 gene_biotype:protein_coding transcript_biotype:protein_coding description:40S ribosomal protein S6 :UniProtKB/TrEMBL;Acc:A0A0D3EGH6]	45.7831	13	246	1	1	249	28.3	10.65	High	High	High	High	High	High	High	High	High	High	High	High	3.786	577.91	13	1.88104e+07	2.16004e+07	2.40231e+07	3.30236e+07	2.93128e+07	3.4005e+07	5.08554e+07	4.85421e+07	48908550	4.40252e+07	4.75993e+07	4.21611e+07	2.1478e+07	1	3.21138e+07	1	4.94353e+07	1	4.45952e+07	1	0.668808	0.00687049	1.10853	0.0505147
Bo5g072610.1		pep chromosome:v2.1:C5:23852766:23858417:-1 gene:Bo5g072610 transcript:Bo5g072610.1 gene_biotype:protein_coding transcript_biotype:protein_coding	23.2014	23	274	5	1	1112	122.9	9.38	High	High	High	High	High	High	High	High	High	High	High	High	1.154	575.81	23	4.8182e+07	3.55401e+07	4.30012e+07	3.36331e+07	5.32763e+07	5.67063e+07	3.02711e+07	2.83174e+07	3.72683e+07	5.58376e+07	3.66616e+07	3.40988e+07	4.22411e+07	1	4.78719e+07	1	3.19523e+07	1	4.21993e+07	1	0.882377	0.523777	0.757174	0.237188
Bo3g059000.1		pep chromosome:v2.1:C3:22687677:22688145:1 gene:Bo3g059000 transcript:Bo3g059000.1 gene_biotype:protein_coding transcript_biotype:protein_coding	55.6452	7	191	1	1	124	14.1	9.55	High	High	High	High	High	High	High	High	High	High	High	High	6.017	575.16	7	1.16687e+09	1.15632e+09	1.13506e+09	9.2181e+08	8.94731e+08	9.15513e+08	1.07299e+09	1.06978e+09	1104537562	1.14466e+09	1.21143e+09	1.12504e+09	1.15275e+09	1	9.10685e+08	1	1.08243e+09	1	1.16038e+09	1	1.26581	4.09704e-05	0.93283	0.0516803
Bo4g005720.1	S-adenosylmethionine synthase	pep chromosome:v2.1:C4:530000:531175:1 gene:Bo4g005720 transcript:Bo4g005720.1 gene_biotype:protein_coding transcript_biotype:protein_coding description:S-adenosylmethionine synthase :UniProtKB/TrEMBL;Acc:A0A0D3BNN0]	31.202	9	220	1	1	391	42.7	5.94	Not Found	High	High	High	Not Found	Not Found	High	Not Found	Not Found	Not Found	Not Found	Not Found	3.299	575.05	9	NA	NA	1.42631e+06	NA	NA	NA	NA	NA	NA	NA	NA	NA	1.42631e+06	0.333333	NA	0	NA	0	NA	0	NA	NA	NA	NA
Bo5g004640.1		pep chromosome:v2.1:C5:1353506:1357546:1 gene:Bo5g004640 transcript:Bo5g004640.1 gene_biotype:protein_coding transcript_biotype:protein_coding	48.8506	17	235	16	1	522	56.5	6.73	High	High	High	High	High	High	High	High	High	High	High	High	3.354	573.85	17	2.0046e+08	1.96173e+08	1.87152e+08	2.97399e+08	2.96148e+08	3.03473e+08	3.0093e+08	2.84299e+08	2.93817e+08	2.65374e+08	1.76979e+08	2.64335e+08	1.94595e+08	1	2.99006e+08	1	2.93015e+08	1	2.35563e+08	1	0.650805	2.09497e-05	1.2439	0.125053
Bo3g109370.1		pep chromosome:v2.1:C3:38923825:38928483:-1 gene:Bo3g109370 transcript:Bo3g109370.1 gene_biotype:protein_coding transcript_biotype:protein_coding	15.3925	15	232	1	1	981	107.4	7.03	High	High	High	High	High	High	Not Found	Not Found	Not Found	High	High	High	0.817	572.85	15	1.47751e+08	1.6648e+08	1.57053e+08	1.9813e+08	1.84648e+08	1.96987e+08	NA	NA	NA	2.09861e+07	3.16794e+07	2.92159e+07	1.57095e+08	1	1.93255e+08	1	NA	0	2.72938e+07	1	0.812888	0.00639746	NA	NA
Bo3g086790.1	DNA helicase	pep chromosome:v2.1:C3:31954986:31958752:1 gene:Bo3g086790 transcript:Bo3g086790.1 gene_biotype:protein_coding transcript_biotype:protein_coding description:DNA helicase :UniProtKB/TrEMBL;Acc:A0A0D3BDI0]	45.392	30	224	30	1	727	80.7	6.99	High	High	High	High	High	High	High	High	High	High	High	High	2.58	572.01	30	1.17761e+08	1.21948e+08	1.1546e+08	1.33548e+08	1.34704e+08	1.28217e+08	9.85807e+07	1.00402e+08	9.44957e+07	9.49376e+07	1.00084e+08	9.63202e+07	1.1839e+08	1	1.32156e+08	1	9.78262e+07	1	9.7114e+07	1	0.89583	0.00752007	1.00733	0.774818
Bo9g018890.1		pep chromosome:v2.1:C9:6015963:6017333:1 gene:Bo9g018890 transcript:Bo9g018890.1 gene_biotype:protein_coding transcript_biotype:protein_coding	50.6579	18	204	18	1	456	50.5	7.39	High	High	High	High	High	High	High	High	High	High	High	High	2.793	571.84	18	1.95764e+08	1.99507e+08	1.98535e+08	2.3136e+08	2.3857e+08	1.90451e+08	1.95344e+08	2.51859e+08	1.98344e+08	2.03893e+08	2.00472e+08	1.61042e+08	1.97935e+08	1	2.20127e+08	1	2.15182e+08	1	1.88469e+08	1	0.899186	0.213742	1.14174	0.308881
Bo4g002420.1		pep chromosome:v2.1:C4:245668:249612:-1 gene:Bo4g002420 transcript:Bo4g002420.1 gene_biotype:protein_coding transcript_biotype:protein_coding	14.1401	14	230	3	1	785	88.4	8.27	High	High	High	High	High	Not Found	High	Not Found	High	High	High	High	0.903	570.18	14	1.33755e+07	1.38391e+07	1.21243e+07	1.49757e+07	1.69362e+07	NA	1.28031e+07	NA	9.7724e+06	1.35588e+07	1.45471e+07	1.64662e+07	1.3113e+07	1	1.59559e+07	0.666667	1.12878e+07	0.666667	1.48574e+07	1	0.821824	0.0632658	0.759742	0.108707
Bo3g016890.1		pep chromosome:v2.1:C3:5446687:5453642:-1 gene:Bo3g016890 transcript:Bo3g016890.1 gene_biotype:protein_coding transcript_biotype:protein_coding	6.53304	8	226	4	1	1347	148.2	8.98	High	High	High	High	High	High	High	High	High	High	High	High	0.27	570.1	8	2.7238e+08	3.88702e+08	2.06709e+08	3.10631e+08	2.96927e+08	3.18552e+08	3.74967e+08	2.75301e+08	5.0067e+08	2.94789e+08	2.94535e+08	3.28229e+08	2.89264e+08	1	3.08703e+08	1	3.83646e+08	1	3.05851e+08	1	0.937028	0.73512	1.25436	0.304833
Bo2g025130.1		pep chromosome:v2.1:C2:7422603:7424666:1 gene:Bo2g025130 transcript:Bo2g025130.1 gene_biotype:protein_coding transcript_biotype:protein_coding	45.3401	16	244	16	1	397	44.6	5.94	High	High	High	High	High	High	High	High	High	High	High	High	3.217	569.96	16	2.80007e+08	2.69443e+08	2.8068e+08	3.33752e+08	3.24853e+08	3.15588e+08	3.20751e+08	3.17588e+08	314485534	3.19043e+08	2.73106e+08	3.006e+08	2.7671e+08	1	3.24731e+08	1	3.17608e+08	1	2.97583e+08	1	0.852121	0.00167085	1.06729	0.211267
Bo1g139760.1		pep chromosome:v2.1:C1:40071394:40079502:1 gene:Bo1g139760 transcript:Bo1g139760.1 gene_biotype:protein_coding transcript_biotype:protein_coding	26	34	310	8	1	1150	134.4	5.85	High	High	High	High	High	High	High	High	High	High	High	High	1.964	567.8	34	1.00864e+07	2.15834e+07	1.40478e+07	3.5992e+07	2.59742e+07	2.60696e+07	4.76971e+07	2.75423e+07	3.10049e+07	1.88778e+07	2.70856e+07	2.92458e+07	1.52392e+07	1	2.93453e+07	1	3.54148e+07	1	2.50697e+07	1	0.519308	0.0407619	1.41265	0.212321
Bo1g011060.1	40S ribosomal protein S6	pep chromosome:v2.1:C1:3881555:3883038:1 gene:Bo1g011060 transcript:Bo1g011060.1 gene_biotype:protein_coding transcript_biotype:protein_coding description:40S ribosomal protein S6 :UniProtKB/TrEMBL;Acc:A0A0D3A2T1]	45.6	13	243	1	1	250	28.4	10.67	Not Found	Not Found	High	High	High	High	High	Not Found	High	High	High	High	3.786	567.13	13	NA	NA	7.57105e+06	1.65506e+07	1.73987e+07	2.70416e+07	2.82395e+07	NA	2.19524e+07	3.01859e+07	2.48332e+07	2.91586e+07	7.57105e+06	0.333333	2.03303e+07	1	2.50959e+07	0.666667	2.80593e+07	1	0.372402	NA	0.894391	0.417287
Bo3g052780.1		pep chromosome:v2.1:C3:20897219:20898768:-1 gene:Bo3g052780 transcript:Bo3g052780.1 gene_biotype:protein_coding transcript_biotype:protein_coding	54.4041	11	199	2	1	193	22	7.53	High	High	High	High	High	High	High	High	High	High	High	High	15.379	565.24	11	5.25807e+07	4.77105e+07	6.50033e+07	6.4068e+07	6.66557e+07	8.2086e+07	6.21266e+07	3.04942e+07	4.51296e+07	4.91156e+07	5.40158e+07	5.55353e+07	5.50982e+07	1	7.09366e+07	1	4.59168e+07	1	5.28889e+07	1	0.776725	0.106362	0.868174	0.49699
Bo7g012690.1		pep chromosome:v2.1:C7:4201258:4202248:-1 gene:Bo7g012690 transcript:Bo7g012690.1 gene_biotype:protein_coding transcript_biotype:protein_coding	36.8217	10	187	1	1	258	27.9	10.74	Not Found	Not Found	Not Found	High	Not Found	Not Found	Not Found	Not Found	Not Found	Not Found	Not Found	Not Found	3.217	565.14	10	NA	NA	NA	3.22223e+07	NA	NA	NA	NA	NA	NA	NA	NA	NA	0	3.22223e+07	0.333333	NA	0	NA	0	NA	NA	NA	NA
Bo3g127520.1		pep chromosome:v2.1:C3:46615049:46616419:-1 gene:Bo3g127520 transcript:Bo3g127520.1 gene_biotype:protein_coding transcript_biotype:protein_coding	50.5495	12	189	12	1	182	20.9	4.87	High	High	High	High	High	High	High	High	High	High	High	High	10.548	564.31	12	6.44409e+08	6.77694e+08	6.51576e+08	7.59061e+08	7.97291e+08	7.96103e+08	7.62497e+08	7.90286e+08	7.56122e+08	8.02544e+08	8.03591e+08	8.19822e+08	6.57893e+08	1	7.84152e+08	1	7.69635e+08	1	8.08653e+08	1	0.838986	0.00143419	0.95175	0.0304287
Bo2g009600.1		pep chromosome:v2.1:C2:2037159:2039836:-1 gene:Bo2g009600 transcript:Bo2g009600.1 gene_biotype:protein_coding transcript_biotype:protein_coding	38.009	19	254	2	1	442	50.9	6.89	High	High	High	High	High	High	High	High	High	High	High	High	2.639	563.31	19	1.19094e+08	8.6047e+07	1.34275e+08	1.54125e+08	1.66647e+08	1.89129e+08	1.42056e+08	1.79111e+08	8.68341e+07	1.4629e+08	1.6185e+08	1.54657e+08	1.13139e+08	1	1.69967e+08	1	1.36e+08	1	1.54266e+08	1	0.665652	0.0316618	0.881598	0.538449
Bo8g025650.1	ACC1 description	pep chromosome:v2.1:C8:7080907:7090311:-1 gene:Bo8g025650 transcript:Bo8g025650.1 gene_biotype:protein_coding transcript_biotype:protein_coding gene_symbol:ACC1 description:acetyl-CoA carboxylase 1 :TAIR;Acc:AT1G36160](projected from arabidopsis_thaliana,AT1G36160)	22.9288	40	232	30	1	2233	248.7	6.25	High	High	High	High	High	High	High	High	High	High	High	High	0.784	563.25	40	5.65528e+07	4.93742e+07	1.99902e+08	5.46194e+07	5.42922e+07	5.32135e+07	5.56127e+07	2.69208e+08	5.33767e+07	2.23838e+08	5.59932e+07	5.83403e+07	1.01943e+08	1	5.40417e+07	1	1.26066e+08	1	1.12724e+08	1	1.88638	0.383856	1.11836	0.890059
Bo9g102300.1		pep chromosome:v2.1:C9:33033357:33034082:1 gene:Bo9g102300 transcript:Bo9g102300.1 gene_biotype:protein_coding transcript_biotype:protein_coding	39.8374	8	240	1	1	123	13.8	9.72	High	High	High	High	High	High	High	High	High	High	High	High	11.115	562.46	8	4.06495e+08	6.3197e+08	7.03335e+08	6.39139e+08	6.27196e+08	3.4897e+08	6.46175e+08	6.46612e+08	656968384	7.01213e+08	4.68096e+08	6.51305e+08	5.806e+08	1	5.38435e+08	1	6.49918e+08	1	6.06872e+08	1	1.07831	0.762524	1.07093	0.576815
Bo2g049390.1		pep chromosome:v2.1:C2:13974709:13975379:1 gene:Bo2g049390 transcript:Bo2g049390.1 gene_biotype:protein_coding transcript_biotype:protein_coding	39.5161	8	248	1	1	124	13.9	9.72	High	High	High	High	High	High	High	High	High	High	High	High	11.115	562.08	8	5.43763e+08	5.02233e+08	5.29275e+08	4.80052e+08	4.58372e+08	5.01851e+08	5.34942e+08	5.4905e+08	4.92676e+08	5.49794e+08	5.29939e+08	5.17193e+08	5.25091e+08	1	4.80092e+08	1	5.25556e+08	1	5.32309e+08	1	1.09373	0.0617217	0.987314	0.745477
Bo5g149970.1		pep chromosome:v2.1:C5:46093754:46102283:-1 gene:Bo5g149970 transcript:Bo5g149970.1 gene_biotype:protein_coding transcript_biotype:protein_coding	27.3059	27	238	7	1	1095	119.6	6.05	High	High	High	High	High	High	High	High	High	High	High	High	1.561	560.29	27	3.30115e+07	3.58092e+07	4.57959e+07	4.01338e+07	3.73073e+07	5.62634e+07	3.05963e+07	4.13725e+07	4.24347e+07	4.50168e+07	2.37062e+07	3.38812e+07	3.82056e+07	1	4.45682e+07	1	3.81345e+07	1	3.42014e+07	1	0.857239	0.418739	1.115	0.615012
Bo3g184290.1	Proteasome subunit alpha type	pep chromosome:v2.1:C3:63821541:63823657:-1 gene:Bo3g184290 transcript:Bo3g184290.1 gene_biotype:protein_coding transcript_biotype:protein_coding description:Proteasome subunit alpha type :UniProtKB/TrEMBL;Acc:A0A0D3BMZ4]	54.2553	13	185	2	1	282	31	5.55	High	Not Found	High	High	High	High	High	High	High	High	High	High	4.78	556.89	13	1.63853e+08	NA	2.27395e+08	2.05979e+08	2.03414e+08	2.16562e+08	1.64235e+08	1.51491e+08	105479341	1.85956e+08	1.94375e+08	1.81665e+08	1.95624e+08	0.666667	2.08652e+08	1	1.40402e+08	1	1.87332e+08	1	0.93756	0.628306	0.74948	0.0617013
Bo9g002440.1		pep chromosome:v2.1:C9:271056:273488:1 gene:Bo9g002440 transcript:Bo9g002440.1 gene_biotype:protein_coding transcript_biotype:protein_coding	41.5479	19	189	3	1	491	55.8	8.28	High	High	High	Not Found	High	High	Not Found	High	High	High	High	High	2.758	555.23	19	2.74893e+07	1.65366e+07	1.95572e+07	NA	2.33545e+07	2.55938e+07	NA	2.33226e+07	2.10992e+07	1.33639e+07	2.28938e+07	1.16445e+07	2.11944e+07	1	2.44742e+07	0.666667	2.22109e+07	0.666667	1.59674e+07	1	0.865988	0.500941	1.39101	0.267114
Bo1g040440.1		pep chromosome:v2.1:C1:12614400:12615545:-1 gene:Bo1g040440 transcript:Bo1g040440.1 gene_biotype:protein_coding transcript_biotype:protein_coding	32.9609	8	242	2	1	179	19.7	9.76	High	High	High	High	High	High	High	High	High	High	High	High	4.08	554.06	8	3.36118e+08	3.39281e+08	3.36884e+08	2.71784e+08	2.6534e+08	2.8235e+08	2.97362e+08	3.83787e+08	2.71184e+08	3.42843e+08	3.15951e+08	3.62833e+08	3.37428e+08	1	2.73158e+08	1	3.17444e+08	1	3.40542e+08	1	1.23528	0.000219383	0.932173	0.562576
Bo9g173690.1		pep chromosome:v2.1:C9:51196796:51198939:1 gene:Bo9g173690 transcript:Bo9g173690.1 gene_biotype:protein_coding transcript_biotype:protein_coding	42.1801	19	252	4	1	422	48.6	7.9	High	High	High	High	High	High	High	High	High	High	High	High	3.125	553.41	19	1.058e+08	1.02617e+08	1.07381e+08	1.31768e+08	1.308e+08	1.79291e+08	1.55233e+08	7.90177e+07	1.55039e+08	1.09816e+08	1.36858e+08	9.5569e+07	1.05266e+08	1	1.47286e+08	1	1.29763e+08	1	1.14081e+08	1	0.714704	0.0590801	1.13746	0.606723
Bo4g103660.1	Proteasome subunit beta type	pep chromosome:v2.1:C4:25837804:25838970:1 gene:Bo4g103660 transcript:Bo4g103660.1 gene_biotype:protein_coding transcript_biotype:protein_coding description:Proteasome subunit beta type :UniProtKB/TrEMBL;Acc:A0A0D3BWJ5]	56.5022	9	182	2	1	223	24.5	7.01	High	High	High	High	High	High	High	High	High	High	High	High	3.084	553.38	9	4.23026e+08	3.92107e+08	3.80451e+08	4.28649e+08	4.26335e+08	3.95962e+08	4.05785e+08	3.97841e+08	3.79156e+08	4.38642e+08	4.05366e+08	4.26946e+08	3.98528e+08	1	4.16982e+08	1	3.94261e+08	1	4.23651e+08	1	0.955744	0.326031	0.930625	0.0790757
Bo8g081740.1	Proteasome subunit alpha type	pep chromosome:v2.1:C8:27854635:27856141:-1 gene:Bo8g081740 transcript:Bo8g081740.1 gene_biotype:protein_coding transcript_biotype:protein_coding description:Proteasome subunit alpha type :UniProtKB/TrEMBL;Acc:A0A0D3DSG6]	61.6	13	184	4	1	250	27.3	7.94	High	High	High	High	High	High	High	High	High	High	High	High	3.642	553.18	13	2.97786e+08	2.9988e+08	3.92957e+08	2.97649e+08	3.01014e+08	2.82891e+08	2.83588e+08	2.96905e+08	2.84659e+08	4.17129e+08	3.31819e+08	3.33695e+08	3.30208e+08	1	2.93851e+08	1	2.88384e+08	1	3.60881e+08	1	1.12372	0.317633	0.799111	0.0634353
Bo3g023130.1		pep chromosome:v2.1:C3:8281485:8282448:1 gene:Bo3g023130 transcript:Bo3g023130.1 gene_biotype:protein_coding transcript_biotype:protein_coding	37.8531	9	244	1	1	177	19.6	9.61	High	High	Not Found	High	Not Found	High	Not Found	Not Found	Not Found	High	High	Not Found	5.661	552.17	9	3.32252e+08	1.77495e+08	NA	1.55423e+08	NA	2.70842e+08	NA	NA	NA	3.74016e+08	3.28068e+08	NA	2.54873e+08	0.666667	2.13132e+08	0.666667	NA	0	3.51042e+08	0.666667	1.19585	0.707596	NA	NA
Bo7g101450.1	KCS15 description	pep chromosome:v2.1:C7:39527889:39529391:-1 gene:Bo7g101450 transcript:Bo7g101450.1 gene_biotype:protein_coding transcript_biotype:protein_coding gene_symbol:KCS15 description:3-ketoacyl-CoA synthase 15 :TAIR;Acc:AT3G52160](projected from arabidopsis_thaliana,AT3G52160)	40.7002	17	233	16	1	457	51.7	9.17	High	High	High	High	High	High	High	High	High	High	High	High	3.417	551.74	17	2.44326e+08	2.28555e+08	2.22358e+08	2.45555e+08	2.54214e+08	2.49402e+08	1.86899e+08	1.92487e+08	1.9071e+08	1.98584e+08	1.92332e+08	2.00352e+08	2.31746e+08	1	2.49724e+08	1	1.90032e+08	1	1.97089e+08	1	0.928011	0.0621626	0.964192	0.074231
Bo3g025190.1		pep chromosome:v2.1:C3:9551864:9554284:-1 gene:Bo3g025190 transcript:Bo3g025190.1 gene_biotype:protein_coding transcript_biotype:protein_coding	44.0771	12	203	5	1	363	39.5	5.5	High	High	High	High	High	High	High	High	High	High	High	High	2.3	551.31	12	4.34557e+07	3.35353e+07	5.52186e+07	5.01185e+07	4.83742e+07	4.45085e+07	4.39677e+07	1.86263e+07	3.4304e+07	4.42085e+07	3.33115e+07	4.47947e+07	4.40698e+07	1	4.76671e+07	1	3.22994e+07	1	4.07716e+07	1	0.924534	0.60852	0.792203	0.363749
Bo3g054680.1		pep chromosome:v2.1:C3:21506234:21508793:-1 gene:Bo3g054680 transcript:Bo3g054680.1 gene_biotype:protein_coding transcript_biotype:protein_coding	38.477	18	200	2	1	499	56.7	8.5	High	High	High	High	High	High	High	High	High	High	High	High	2.639	549.15	18	6.44703e+07	7.22297e+07	6.36947e+07	7.22532e+07	7.12321e+07	7.35246e+07	7.37862e+07	7.77431e+07	71682916	8.39042e+07	7.88589e+07	7.35267e+07	6.67982e+07	1	7.23366e+07	1	7.44041e+07	1	7.87633e+07	1	0.923436	0.119504	0.944654	0.278948
Bo3g019730.1		pep chromosome:v2.1:C3:6820320:6822955:-1 gene:Bo3g019730 transcript:Bo3g019730.1 gene_biotype:protein_coding transcript_biotype:protein_coding	26.4348	15	230	4	1	575	63.8	5.68	High	High	High	High	High	High	High	High	High	High	High	High	1.387	548.45	15	6.03385e+07	6.48333e+07	1.26852e+07	2.67021e+07	3.06386e+07	3.02391e+07	2.09071e+07	1.99175e+07	2.36411e+07	1.37615e+07	2.36538e+07	8.95671e+06	4.59523e+07	1	2.91933e+07	1	2.14886e+07	1	1.54574e+07	1	1.57407	0.373179	1.39019	0.248352
Bo4g001130.1		pep chromosome:v2.1:C4:91273:98179:1 gene:Bo4g001130 transcript:Bo4g001130.1 gene_biotype:protein_coding transcript_biotype:protein_coding	16.2749	14	206	5	1	1106	121	8.31	High	High	High	High	High	High	High	High	High	High	High	High	0.568	548.28	14	4.10684e+08	4.09522e+08	4.05861e+08	1.89031e+08	4.93065e+08	5.02491e+08	1.68909e+08	4.5065e+08	157050595	1.54374e+08	1.59503e+08	4.82897e+08	4.08689e+08	1	3.94862e+08	1	2.5887e+08	1	2.65591e+08	1	1.03502	0.899657	0.974693	0.965241
Bo8g082810.1		pep chromosome:v2.1:C8:28646699:28647199:-1 gene:Bo8g082810 transcript:Bo8g082810.1 gene_biotype:protein_coding transcript_biotype:protein_coding	62.0482	8	216	2	1	166	17.9	8.97	High	High	High	High	High	High	High	High	High	High	High	High	3.87	548.16	8	7.22876e+07	6.36935e+07	5.99315e+07	6.68019e+07	6.21913e+07	7.9461e+07	6.16287e+07	3.16975e+07	53567002	6.9282e+07	6.74596e+07	7.40531e+07	6.53042e+07	1	6.94847e+07	1	4.89644e+07	1	7.02649e+07	1	0.939835	0.54486	0.696854	0.0805506
Bo4g044190.1		pep chromosome:v2.1:C4:10157873:10160823:1 gene:Bo4g044190 transcript:Bo4g044190.1 gene_biotype:protein_coding transcript_biotype:protein_coding	45.1404	14	173	3	1	463	48.6	8.21	Not Found	Not Found	High	Not Found	High	Not Found	High	High	High	Not Found	Not Found	High	3.532	547.58	14	NA	NA	3.02599e+07	NA	1.74907e+07	NA	1.73222e+06	3.40274e+07	1.89873e+07	NA	NA	2.32529e+07	3.02599e+07	0.333333	1.74907e+07	0.333333	1.8249e+07	1	2.32529e+07	0.333333	1.73006	NA	0.784805	NA
Bo3g172380.1	Serine hydroxymethyltransferase	pep chromosome:v2.1:C3:60621088:60623941:1 gene:Bo3g172380 transcript:Bo3g172380.1 gene_biotype:protein_coding transcript_biotype:protein_coding description:Serine hydroxymethyltransferase :UniProtKB/TrEMBL;Acc:A0A0D3BLU5]	36.7876	19	233	5	1	579	63.7	8.43	High	High	High	High	High	High	High	High	High	High	High	High	2.332	547.08	19	1.24659e+08	1.25172e+08	1.1242e+08	1.55853e+08	1.16499e+08	8.33504e+07	1.40276e+08	1.19605e+08	153635380	1.39708e+08	1.39017e+08	1.45793e+08	1.20751e+08	1	1.18568e+08	1	1.37839e+08	1	1.41506e+08	1	1.01841	0.923535	0.974085	0.735676
Bo4g073130.1	AGO5 description	pep chromosome:v2.1:C4:15752136:15756918:-1 gene:Bo4g073130 transcript:Bo4g073130.1 gene_biotype:protein_coding transcript_biotype:protein_coding gene_symbol:AGO5 description:Argonaute family protein :TAIR;Acc:AT2G27880](projected from arabidopsis_thaliana,AT2G27880)	30.2999	26	230	24	1	967	107.4	9.54	High	High	High	High	High	High	High	High	High	High	High	High	1.441	546.71	26	1.18753e+08	1.1471e+08	1.18188e+08	1.05027e+08	1.11076e+08	1.12529e+08	1.43913e+08	1.54419e+08	1.47373e+08	1.50462e+08	1.46528e+08	1.43204e+08	1.17217e+08	1	1.09544e+08	1	1.48568e+08	1	1.46731e+08	1	1.07005	0.0429663	1.01252	0.648615
Bo5g128880.1		pep chromosome:v2.1:C5:39881457:39883545:-1 gene:Bo5g128880 transcript:Bo5g128880.1 gene_biotype:protein_coding transcript_biotype:protein_coding	34.1353	19	221	5	1	665	74.6	6.92	High	High	High	High	High	High	High	High	High	High	High	High	1.601	546.55	19	3.65966e+07	6.0058e+07	4.30844e+07	6.65318e+07	5.73814e+07	7.43397e+07	5.46734e+07	5.62706e+07	5.95679e+07	4.15505e+07	6.41413e+06	3.86379e+07	4.65797e+07	1	6.60843e+07	1	5.68373e+07	1	2.88675e+07	1	0.704852	0.0844328	1.9689	0.0693702
Bo7g100820.1	Ribosomal protein L2 family	pep chromosome:v2.1:C7:39268708:39269660:-1 gene:Bo7g100820 transcript:Bo7g100820.1 gene_biotype:protein_coding transcript_biotype:protein_coding description:Ribosomal protein L2 family :Projected from Arabidopsis thaliana (AT3G51190) TAIR;Acc:AT3G51190]	32.8185	9	184	4	1	259	28	10.76	High	High	High	High	High	High	High	High	High	High	High	High	2.831	544.72	9	1.10342e+08	1.16905e+08	1.15798e+08	9.99241e+07	1.12518e+08	1.09264e+08	7.89297e+07	8.53501e+07	7.37637e+07	8.51472e+07	8.02522e+07	8.28769e+07	1.14349e+08	1	1.07235e+08	1	7.93478e+07	1	8.27587e+07	1	1.06633	0.172235	0.958785	0.401478
Bo3g042840.1	Zn-dependent exopeptidases superfamily protein	pep chromosome:v2.1:C3:17818552:17821097:1 gene:Bo3g042840 transcript:Bo3g042840.1 gene_biotype:protein_coding transcript_biotype:protein_coding description:Zn-dependent exopeptidases superfamily protein :TAIR;Acc:AT5G60160](projected from arabidopsis_thaliana,AT5G60160)	36.4017	14	208	14	1	478	52.3	6.67	High	High	High	High	High	High	High	High	High	High	High	High	2.262	544.45	14	1.48013e+08	1.72537e+08	1.51838e+08	1.52655e+08	1.68478e+08	1.76252e+08	1.53664e+08	1.77537e+08	1.80809e+08	1.7751e+08	1.88887e+08	1.78641e+08	1.57463e+08	1	1.65795e+08	1	1.7067e+08	1	1.81679e+08	1	0.949743	0.464173	0.939401	0.301532
Bo7g075190.1	DNA helicase	pep chromosome:v2.1:C7:28045202:28048791:-1 gene:Bo7g075190 transcript:Bo7g075190.1 gene_biotype:protein_coding transcript_biotype:protein_coding description:DNA helicase :UniProtKB/TrEMBL;Acc:A0A0D3D9F9]	37.0947	24	188	24	1	771	85.8	6.35	High	High	High	High	High	High	High	High	High	High	High	High	1.75	543.38	24	1.6476e+08	1.56051e+08	1.49835e+08	9.77588e+07	1.45977e+08	1.29674e+08	9.21316e+07	6.74517e+07	7.08629e+07	6.60171e+07	1.2591e+08	1.13608e+08	1.56882e+08	1	1.2447e+08	1	7.68154e+07	1	1.01845e+08	1	1.2604	0.0938054	0.754239	0.275404
Bo1g057400.1	Proteasome subunit beta type	pep chromosome:v2.1:C1:17299900:17301248:-1 gene:Bo1g057400 transcript:Bo1g057400.1 gene_biotype:protein_coding transcript_biotype:protein_coding description:Proteasome subunit beta type :UniProtKB/TrEMBL;Acc:A0A0D3A843]	57.8431	11	212	7	1	204	22.5	6.54	High	High	High	High	High	High	High	High	High	High	High	High	3.642	542.52	11	4.05041e+08	4.27921e+08	4.02523e+08	4.50147e+08	4.41503e+08	4.50451e+08	4.08201e+08	3.82177e+08	3.83479e+08	3.86207e+08	3.944e+08	4.03648e+08	4.11828e+08	1	4.47367e+08	1	3.91286e+08	1	3.94752e+08	1	0.920561	0.0144389	0.991219	0.742711
Bo3g039580.1	RNA helicase family protein	pep chromosome:v2.1:C3:15891194:15892951:-1 gene:Bo3g039580 transcript:Bo3g039580.1 gene_biotype:protein_coding transcript_biotype:protein_coding description:RNA helicase family protein :TAIR;Acc:AT2G47250](projected from arabidopsis_thaliana,AT2G47250)	47.5379	20	210	9	1	528	58.8	5.77	High	High	High	High	High	High	High	High	High	High	High	High	2.639	542.06	20	2.61513e+07	3.13289e+07	3.23302e+07	3.07912e+07	3.40202e+07	3.33674e+07	4.70504e+07	3.69776e+07	3.64332e+07	2.65248e+07	3.50662e+07	2.74234e+07	2.99368e+07	1	3.27263e+07	1	4.01537e+07	1	2.96714e+07	1	0.914764	0.264916	1.35328	0.0752834
Bo4g119860.1	Histone H2A	pep chromosome:v2.1:C4:30944024:30945837:1 gene:Bo4g119860 transcript:Bo4g119860.1 gene_biotype:protein_coding transcript_biotype:protein_coding description:Histone H2A :UniProtKB/TrEMBL;Acc:A0A0D3BY26]	21.5054	4	236	3	1	186	20.1	10.49	High	High	High	High	High	High	High	High	High	High	High	High	1.581	541.33	4	4.5728e+09	4.25281e+09	4.12697e+09	4.54385e+09	4.53151e+09	4.16571e+09	4.41256e+09	4.0442e+09	4253035142	5.02209e+09	5.00912e+09	4.97827e+09	4.31752e+09	1	4.41369e+09	1	4.2366e+09	1	5.00316e+09	1	0.978212	0.624546	0.846785	0.002041
[truncated: 5,239 more rows]
[truncated: 8 more columns]

## Sheet: Zhonggan628
Accession	Protein name	Sequencecoverage (%)	Score	32℃/25℃Fold change
Bo2g159220.1	vegetative storage protein 2	44.7761	140.13	1.50005
Bo6g095240.1	60S ribosomal protein L10-3	42.5339	234.04	1.50011
Bo2g009030.1	CONTAINS InterPro DOMAIN/s	6	25.41	1.50125
[truncated: 360 more rows]

## Sheet: 87534
Accession	Protein name	Sequencecoverage (%)	Score	32℃/25℃Fold change
[truncated: 282 more rows]

[truncated: 1 more sheets: 97key]
