# Supplementary material for: Proteomic variations after short-term heat shock treatment reveal differentially expressed proteins involved in early microspore embryogenesis in cabbage (Brassica oleracea)
Source: PeerJ. 2020 Apr 8;8:e8897. doi: 10.7717/peerj.8897 (PMC7169393; doi:10.7717/peerj.8897)
Supplement: Table S3 [file peerj-08-8897-s003.xlsx]

## Sheet: GO
go				ID
GO:0000003	biological_process	reproduction	5	Bo5g148790.1,Bo5g138000.1,Bo5g139630.1，Bo7g031510.1，Bo1g022160.1，
GO:0002376	biological_process	immune system process	1	Bo9g058480.1,
GO:0008152	biological_process	metabolic process	41	Bo4g039810.1,Bo7g014940.1,Bo8g002740.1,Bo4g137140.1,Bo9g058480.1,Bo9g178890.1,Bo6g031300.1,Bo4g195440.1,Bo5g134950.1,Bo7g109690.1,Bo9g029370.1,Bo9g176160.1,Bo3g070270.1,Bo1g119140.1,Bo7g100810.1,Bo6g118620.1,Bo9g166780.1,Bo9g096980.1,Bo9g165640.1,Bo6g069610.1,Bo3g103030.1，Bo8g083090.1，Bo1g139700.1，Bo6g082110.1，Bo4g149430.1，Bo5g029180.1，Bo3g018760.1，Bo3g086850.1，Bo3g086850.1，Bo01443s010.1，Bo7g0617…
GO:0009987	biological_process	cellular process	41	Bo4g039810.1,Bo8g071060.1,Bo7g014940.1,Bo8g002740.1,Bo4g137140.1,Bo9g058480.1,Bo9g178890.1,Bo2g023100.1,Bo4g139910.1,Bo6g031300.1,Bo4g195440.1,Bo5g138000.1,Bo7g109690.1,Bo1g007230.1,Bo3g010510.1,Bo9g176160.1,Bo3g070270.1,Bo1g119140.1,Bo7g100810.1,Bo8g093180.1,Bo6g118620.1,Bo9g166780.1,Bo9g096980.1,Bo9g165640.1,Bo5g139630.1,Bo3g103030.1,Bo9g120230.1，Bo8g083090.1，Bo4g149430.1，Bo3g018760.1，Bo3g08685…
GO:0022414	biological_process	reproductive process	5	Bo5g148790.1,Bo5g138000.1,Bo5g139630.1,Bo7g031510.1，Bo1g022160.1，
GO:0032501	biological_process	multicellular organismal process	7	Bo3g083960.1,Bo5g148790.1,Bo4g139910.1,Bo5g138000.1,Bo5g139630.1,Bo7g031510.1，Bo1g022160.1，
GO:0032502	biological_process	developmental process	11	Bo3g083960.1,Bo5g148790.1,Bo4g139910.1,Bo5g138000.1,Bo1g007230.1,Bo5g139630.1,Bo3g103030.1,Bo3g086850.1，Bo3g086850.1，Bo7g031510.1，Bo1g022160.1，
GO:0040007	biological_process	growth	6	Bo5g138000.1,Bo1g007230.1,Bo3g010510.1,Bo3g103030.1,Bo3g086850.1，Bo3g086850.1，
GO:0044699	biological_process	single-organism process	36	Bo3g083960.1,Bo8g071060.1,Bo7g014940.1,Bo4g137140.1,Bo5g148790.1,Bo9g058480.1,Bo4g139910.1,Bo6g031300.1,Bo4g195440.1,Bo5g138000.1,Bo5g134950.1,Bo7g109690.1,Bo1g007230.1,Bo3g010510.1,Bo3g070270.1,Bo1g119140.1,Bo8g093180.1,Bo9g166780.1,Bo9g096980.1,Bo9g165640.1,Bo5g139630.1,Bo3g103030.1,Bo1g139700.1，Bo4g149430.1，Bo5g029180.1，Bo3g086850.1，Bo3g086850.1，Bo01443s010.1，Bo7g061770.1，Bo9g181920.1，Bo7g1006…
GO:0050896	biological_process	response to stimulus	15	Bo3g083960.1,Bo9g058480.1,Bo9g178890.1,Bo5g138000.1,Bo2g166530.1,Bo6g118620.1,Bo3g103030.1,Bo9g120230.1，Bo01276s010.1，Bo1g050780.1，Bo3g018760.1，Bo3g086850.1，Bo3g086850.1，Bo1g036850.1，Bo7g031510.1，
GO:0051179	biological_process	localization	7	Bo7g089410.1,Bo4g139910.1,Bo7g014530.1,Bo8g093180.1,Bo9g181920.1，Bo7g031510.1，Bo1g059070.1，
GO:0051704	biological_process	multi-organism process	5	Bo5g148790.1,Bo9g058480.1,Bo5g138000.1,Bo3g103030.1，Bo1g022160.1，
GO:0065007	biological_process	biological regulation	10	Bo8g071060.1,Bo2g023100.1,Bo5g138000.1,Bo7g014530.1,Bo6g118620.1,Bo9g096980.1,Bo5g139630.1,Bo5g148050.1，Bo7g100660.1，Bo7g031510.1，
GO:0071840	biological_process	cellular component organization or biogenesis	12	Bo4g139910.1,Bo5g138000.1,Bo1g007230.1,Bo3g010510.1,Bo8g093180.1,Bo5g139630.1,Bo3g103030.1,Bo3g086850.1，Bo3g086850.1，Bo7g031510.1，Bo1g022160.1，Bo7g087250.1，
GO:0001071	molecular_function	nucleic acid binding transcription factor activity	1	Bo2g165560.1,
GO:0003824	molecular_function	catalytic activity	48	Bo3g055140.1,Bo8g071060.1,Bo7g014940.1,Bo4g137140.1,Bo3g022100.1,Bo9g058480.1,Bo9g178890.1,Bo6g031300.1,Bo4g195440.1,Bo5g138000.1,Bo5g134950.1,Bo7g109690.1,Bo9g029370.1,Bo9g176160.1,Bo3g070270.1,Bo1g119140.1,Bo7g100810.1,Bo4g026800.1,Bo9g166780.1,Bo9g096980.1,Bo9g165640.1,Bo6g069610.1,Bo3g103030.1,Bo3g071900.1，Bo01276s010.1，Bo1g139700.1，Bo6g082110.1，Bo4g149430.1，Bo5g029180.1，Bo1g005260.1，Bo3g0187…
GO:0005198	molecular_function	structural molecule activity	3	Bo8g083090.1，Bo2g097540.1，Bo5g005310.1，
GO:0005488	molecular_function	binding	38	Bo4g039810.1,Bo7g089410.1,Bo3g055140.1,Bo3g022100.1,Bo9g178890.1,Bo2g023100.1,Bo3g065020.1,Bo5g138000.1,Bo5g115620.1,Bo2g166530.1,Bo5g042870.1,Bo7g014530.1,Bo9g163310.1,Bo9g029370.1,Bo9g176160.1,Bo3g070270.1,Bo1g119140.1,Bo5g021500.1,Bo6g118620.1,Bo9g096980.1,Bo9g165640.1,Bo2g165560.1,Bo5g139630.1,Bo3g103030.1,Bo9g120230.1，Bo8g066630.1，Bo3g071900.1，Bo01276s010.1，Bo6g082110.1，Bo1g005260.1，Bo3g0187…
GO:0098772	molecular_function	molecular function regulator	2	Bo9g096980.1,Bo9g120230.1，
GO:0005576	cellular_component	extracellular region	8	Bo9g178890.1,Bo5g138000.1,Bo2g166530.1,Bo3g018760.1，Bo3g086850.1，Bo3g086850.1，Bo1g036850.1，Bo7g031510.1，
GO:0005623	cellular_component	cell	44	Bo4g039810.1,Bo7g089410.1,Bo3g083960.1,Bo8g071060.1,Bo7g014940.1,Bo4g137140.1,Bo9g058480.1,Bo9g178890.1,Bo2g023100.1,Bo4g139910.1,Bo4g195440.1,Bo5g138000.1,Bo2g166530.1,Bo4g027180.1,Bo1g007230.1,Bo5g042870.1,Bo7g014530.1,Bo5g136380.1,Bo9g176160.1,Bo4g026800.1,Bo8g093180.1,Bo6g118620.1,Bo9g166780.1,Bo9g096980.1,Bo9g165640.1,Bo6g069610.1,Bo2g165560.1,Bo5g139630.1,Bo3g103030.1,Bo9g120230.1，Bo8g08309…
GO:0016020	cellular_component	membrane	26	Bo4g039810.1,Bo6g116530.1,Bo5g148790.1,Bo9g178890.1,Bo3g042250.1,Bo4g139910.1,Bo5g138000.1,Bo4g027180.1,Bo3g010510.1,Bo5g042870.1,Bo7g014530.1,Bo5g136380.1,Bo4g026800.1,Bo8g093180.1,Bo5g139630.1,Bo8g083090.1，Bo01276s010.1，Bo3g086850.1，Bo3g086850.1，Bo01443s010.1，Bo1g105510.1，Bo2g098750.1，Bo8g080940.1，Bo7g061790.1，Bo7g031510.1，Bo5g051840.1，
GO:0030054	cellular_component	cell junction	5	Bo5g148790.1,Bo5g138000.1,Bo6g069610.1,Bo3g086850.1，Bo3g086850.1，
GO:0031974	cellular_component	membrane-enclosed lumen	2	Bo5g138000.1，Bo9g120230.1，
GO:0032991	cellular_component	macromolecular complex	7	Bo4g039810.1,Bo5g138000.1,Bo8g093180.1,Bo8g083090.1，Bo9g181920.1，Bo2g097540.1，Bo5g005310.1，
GO:0043226	cellular_component	organelle	31	Bo4g039810.1,Bo3g083960.1,Bo8g071060.1,Bo7g014940.1,Bo4g137140.1,Bo9g178890.1,Bo4g195440.1,Bo5g138000.1,Bo2g166530.1,Bo4g027180.1,Bo5g042870.1,Bo7g014530.1,Bo5g136380.1,Bo4g026800.1,Bo8g093180.1,Bo6g118620.1,Bo9g096980.1,Bo9g165640.1,Bo2g165560.1,Bo5g139630.1，Bo9g120230.1，Bo8g083090.1，Bo6g082110.1，Bo3g086850.1，Bo3g086850.1，Bo5g148050.1，Bo2g097540.1，Bo2g098750.1，Bo1g036850.1，Bo5g005310.1，Bo7g03151…
GO:0044422	cellular_component	organelle part	14	Bo4g039810.1,Bo9g178890.1,Bo5g138000.1,Bo4g027180.1,Bo5g042870.1,Bo7g014530.1,Bo5g136380.1,Bo8g093180.1,Bo6g118620.1,Bo9g120230.1，Bo8g083090.1，Bo2g097540.1，Bo2g098750.1，Bo7g031510.1，
GO:0044425	cellular_component	membrane part	21	Bo4g039810.1,Bo6g116530.1,Bo5g148790.1,Bo3g042250.1,Bo4g139910.1,Bo4g027180.1,Bo3g010510.1,Bo5g042870.1,Bo7g014530.1,Bo5g136380.1,Bo4g026800.1,Bo8g093180.1,Bo5g139630.1,Bo01276s010.1，Bo01443s010.1，Bo1g105510.1，Bo2g098750.1，Bo8g080940.1，Bo7g061790.1，Bo7g031510.1，Bo5g051840.1，
GO:0044464	cellular_component	cell part	42	Bo4g039810.1,Bo7g089410.1,Bo3g083960.1,Bo8g071060.1,Bo7g014940.1,Bo4g137140.1,Bo9g058480.1,Bo9g178890.1,Bo2g023100.1,Bo4g139910.1,Bo4g195440.1,Bo5g138000.1,Bo2g166530.1,Bo1g007230.1,Bo5g042870.1,Bo7g014530.1,Bo5g136380.1,Bo9g176160.1,Bo4g026800.1,Bo8g093180.1,Bo6g118620.1,Bo9g166780.1,Bo9g096980.1,Bo9g165640.1,Bo6g069610.1,Bo2g165560.1,Bo5g139630.1,Bo3g103030.1,Bo9g120230.1，Bo01276s010.1，Bo6g0821…
GO:0055044	cellular_component	symplast	6	Bo5g148790.1,Bo5g138000.1,Bo6g069610.1,Bo8g083090.1，Bo3g086850.1，Bo3g086850.1
下调
上调

## Sheet: KEGG
ko-ID	description	number	ID
ko00010	Glycolysis / Gluconeogenesis	2	Bo9g058480.1，Bo7g109690.1，
ko01200	Carbon metabolism	9	Bo7g014940.1,Bo4g137140.1,Bo9g058480.1，Bo6g031300.1，Bo7g109690.1，Bo9g029370.1，Bo9g166780.1，Bo9g165640.1，Bo01276s010.1
ko00073	Cutin, suberine and wax biosynthesis	1	Bo1g139700.1，
ko00630	Glyoxylate and dicarboxylate metabolism	6	Bo4g137140.1,Bo6g031300.1，Bo3g070270.1，Bo1g119140.1，Bo9g165640.1，Bo01276s010.1，
ko00500	Starch and sucrose metabolism	3	Bo9g058480.1,Bo7g109690.1，Bo4g194980.1，
ko00710	Carbon fixation in photosynthetic organisms	2	Bo4g137140.1,Bo6g031300.1，
ko04141	Protein processing in endoplasmic reticulum	8	Bo8g071060.1,Bo3g065020.1，Bo5g138000.1，Bo4g026800.1，Bo5g021500.1，Bo3g103030.1，Bo8g066630.1，Bo1g050780.1，
ko04626	Plant-pathogen interaction	2	Bo3g045210.1，Bo7g108890.1，
