# Supplementary material for: Proteomic variations after short-term heat shock treatment reveal differentially expressed proteins involved in early microspore embryogenesis in cabbage (Brassica oleracea)
Source: PeerJ. 2020 Apr 8;8:e8897. doi: 10.7717/peerj.8897 (PMC7169393; doi:10.7717/peerj.8897)
Supplement: Table S4 [file peerj-08-8897-s004.xlsx]

## Sheet: 64 DEPs
#node1	node2	node1_string_internal_id	node2_string_internal_id	node1_external_id	node2_external_id	neighborhood_on_chromosome	gene_fusion	phylogenetic_cooccurrence	homology	coexpression	experimentally_determined_interaction	database_annotated	automated_textmining	combined_score
HSP70	HSP101	127860	121703	3702.AT3G12580.1	3702.AT1G74310.1	0.454	0	0	0	0.9	0.378	0	0.876	0.995
HSP101	Hsp70b	121703	116919	3702.AT1G74310.1	3702.AT1G16030.1	0.454	0	0	0	0.839	0.378	0	0.725	0.983
TRA2	PGI1	137428	134515	3702.AT5G13420.1	3702.AT4G24620.1	0.454	0	0	0	0.339	0	0.9	0.449	0.977
MGE1	HSP70	141176	127860	3702.AT5G55200.1	3702.AT3G12580.1	0.454	0	0	0	0.733	0.671	0	0.507	0.973
AT5G42740	TRA2	139798	137428	3702.AT5G42740.1	3702.AT5G13420.1	0.454	0	0	0	0.236	0	0.9	0.449	0.973
HSFA7A	Hsp70b	130836	116919	3702.AT3G51910.1	3702.AT1G16030.1	0	0	0	0	0.438	0.105	0.9	0.468	0.969
MGE1	Hsp70b	141176	116919	3702.AT5G55200.1	3702.AT1G16030.1	0.454	0	0	0	0.733	0.671	0	0.372	0.965
HSP21	Hsp70b	134846	116919	3702.AT4G27670.1	3702.AT1G16030.1	0.454	0	0	0	0.843	0.089	0	0.588	0.963
HSFA7A	HSP70	130836	127860	3702.AT3G51910.1	3702.AT3G12580.1	0	0	0	0	0.354	0.105	0.9	0.442	0.963
HSP21	HSP101	134846	121703	3702.AT4G27670.1	3702.AT1G74310.1	0.454	0	0	0	0.61	0.084	0	0.813	0.958
HSFA7A	ROF1	130836	129276	3702.AT3G51910.1	3702.AT3G25230.2	0	0	0	0	0.147	0.108	0.9	0.42	0.949
HSP70	Hsp70b	127860	116919	3702.AT3G12580.1	3702.AT1G16030.1	0	0	0.527	0.987	0.471	0	0.9	0.635	0.945
HSP70	TPR10	127860	127042	3702.AT3G12580.1	3702.AT3G04710.3	0.063	0	0	0	0.269	0.823	0	0.503	0.931
AT2G20420	mMDH1	123662	119664	3702.AT2G20420.1	3702.AT1G53240.1	0.454	0	0	0	0.359	0.1	0.525	0.588	0.927
TPR10	Hsp70b	127042	116919	3702.AT3G04710.3	3702.AT1G16030.1	0.063	0	0	0	0.122	0.823	0	0.503	0.918
HSP21	HSP70	134846	127860	3702.AT4G27670.1	3702.AT3G12580.1	0.454	0	0	0	0.442	0.089	0	0.722	0.912
HSFA7A	CDC48	130836	127559	3702.AT3G51910.1	3702.AT3G09840.1	0	0	0	0	0	0	0.9	0.058	0.901
ERO2	PDIL1-1	125646	117499	3702.AT2G38960.3	3702.AT1G21750.1	0	0	0	0	0	0.138	0.8	0.473	0.901
AT5G42740	PGI1	139798	134515	3702.AT5G42740.1	3702.AT4G24620.1	0	0	0.224	0.691	0.204	0	0.8	0.866	0.885
FDH	mMDH1	137567	119664	3702.AT5G14780.1	3702.AT1G53240.1	0.067	0	0	0	0.093	0.045	0.8	0.367	0.879
MGE1	HSP101	141176	121703	3702.AT5G55200.1	3702.AT1G74310.1	0.454	0	0	0	0.289	0.491	0	0.411	0.868
MGE1	CPN20	141176	138200	3702.AT5G55200.1	3702.AT5G20720.1	0	0	0	0	0.788	0.045	0	0.391	0.865
ROF1	TPR10	129276	127042	3702.AT3G25230.2	3702.AT3G04710.3	0	0	0	0	0.747	0.067	0	0.465	0.862
SGT1A	SGT1B	134402	133014	3702.AT4G23570.3	3702.AT4G11260.1	0	0	0	0.982	0	0.114	0.8	0.959	0.818
CPN20	HSP70	138200	127860	3702.AT5G20720.1	3702.AT3G12580.1	0.138	0	0	0	0.339	0.121	0	0.654	0.803
AT2G20420	IDH2	123662	123323	3702.AT2G20420.1	3702.AT2G17130.1	0.061	0	0	0	0.28	0.541	0	0.391	0.785
SGT1B	HSP70	133014	127860	3702.AT4G11260.1	3702.AT3G12580.1	0	0	0	0	0	0.707	0	0.285	0.783
HSFA7A	HSP101	130836	121703	3702.AT3G51910.1	3702.AT1G74310.1	0	0	0	0	0.445	0.044	0	0.62	0.78
BOB1	ROF1	140974	129276	3702.AT5G53400.1	3702.AT3G25230.2	0	0	0	0	0.763	0	0	0.109	0.78
ROF1	HSP70	129276	127860	3702.AT3G25230.2	3702.AT3G12580.1	0	0	0	0	0.454	0.106	0	0.577	0.776
ROF1	HSP101	129276	121703	3702.AT3G25230.2	3702.AT1G74310.1	0	0	0	0	0.514	0.044	0	0.519	0.757
CPN20	Hsp70b	138200	116919	3702.AT5G20720.1	3702.AT1G16030.1	0.138	0	0	0	0.339	0.121	0	0.454	0.689
AT1G77670	mMDH1	122042	119664	3702.AT1G77670.1	3702.AT1G53240.1	0.062	0	0	0	0.093	0	0.525	0.319	0.688
RSW3	PDIL1-1	142090	117499	3702.AT5G63840.1	3702.AT1G21750.1	0	0	0	0	0.201	0.625	0	0	0.687
RSW3	ERO2	142090	125646	3702.AT5G63840.1	3702.AT2G38960.3	0	0	0	0	0.063	0.548	0	0.307	0.681
AT5G48650	PRP39	140462	115626	3702.AT5G48650.1	3702.AT1G04080.3	0	0	0	0	0.102	0	0	0.645	0.667
SIR	GLN1.3	136574	128461	3702.AT5G04590.1	3702.AT3G17820.1	0	0	0	0	0	0	0.525	0.319	0.662
BOB1	TPR10	140974	127042	3702.AT5G53400.1	3702.AT3G04710.3	0	0	0	0	0.647	0	0	0	0.647
CDC48	TPR10	127559	127042	3702.AT3G09840.1	3702.AT3G04710.3	0	0	0	0	0	0.63	0	0.068	0.64
TPR10	HSP101	127042	121703	3702.AT3G04710.3	3702.AT1G74310.1	0	0	0	0	0.4	0.126	0	0.368	0.639
HSP70	CDC48	127860	127559	3702.AT3G12580.1	3702.AT3G09840.1	0.106	0	0	0	0	0.106	0	0.559	0.616
PGI1	mMDH1	134515	119664	3702.AT4G24620.1	3702.AT1G53240.1	0.133	0	0	0	0.284	0	0	0.404	0.598
CPN20	PDIL1-1	138200	117499	3702.AT5G20720.1	3702.AT1G21750.1	0.064	0	0	0	0.121	0.367	0	0.319	0.597
FDH	AT1G77670	137567	122042	3702.AT5G14780.1	3702.AT1G77670.1	0.1	0	0	0	0.074	0	0.525	0.1	0.596
ROF1	Hsp70b	129276	116919	3702.AT3G25230.2	3702.AT1G16030.1	0	0	0	0	0.269	0.106	0	0.42	0.588
SGT1A	HSP70	134402	127860	3702.AT4G23570.3	3702.AT3G12580.1	0	0	0	0	0.369	0.044	0	0.361	0.581
HSP70	PDIL1-1	127860	117499	3702.AT3G12580.1	3702.AT1G21750.1	0.047	0	0	0	0.168	0.12	0	0.468	0.579
HSP21	HSFA7A	134846	130836	3702.AT4G27670.1	3702.AT3G51910.1	0	0	0	0	0.438	0	0	0.281	0.578
AT5G42740	mMDH1	139798	119664	3702.AT5G42740.1	3702.AT1G53240.1	0.133	0	0	0	0.236	0	0	0.404	0.571
UBA2	CDC48	136771	127559	3702.AT5G06460.1	3702.AT3G09840.1	0	0	0	0	0.282	0.061	0	0.402	0.562
QS	UBA2	140631	136771	3702.AT5G50210.1	3702.AT5G06460.1	0.057	0	0	0	0	0	0.524	0.097	0.559
PDIL1-1	Hsp70b	117499	116919	3702.AT1G21750.1	3702.AT1G16030.1	0.047	0	0	0	0.168	0.12	0	0.435	0.553
SGT1A	TPR10	134402	127042	3702.AT4G23570.3	3702.AT3G04710.3	0	0	0	0	0.132	0.133	0	0.447	0.547
ROF1	CDC48	129276	127559	3702.AT3G25230.2	3702.AT3G09840.1	0.049	0	0	0	0.044	0.11	0	0.504	0.545
QS	Hsp70b	140631	116919	3702.AT5G50210.1	3702.AT1G16030.1	0	0	0	0	0	0.255	0	0.414	0.544
CPN20	TPR10	138200	127042	3702.AT5G20720.1	3702.AT3G04710.3	0	0	0	0	0.188	0.432	0	0.092	0.544
QS	HSP70	140631	127860	3702.AT5G50210.1	3702.AT3G12580.1	0	0	0	0	0	0.255	0	0.414	0.544
AT4G22390	SGT1B	134272	133014	3702.AT4G22390.1	3702.AT4G11260.1	0	0	0	0	0	0	0.54	0	0.54
SGT1A	AT4G22390	134402	134272	3702.AT4G23570.3	3702.AT4G22390.1	0	0	0	0	0	0	0.54	0	0.54
SGT1A	HSP101	134402	121703	3702.AT4G23570.3	3702.AT1G74310.1	0	0	0	0	0.526	0	0	0.049	0.53
TRA2	PDIL1-1	137428	117499	3702.AT5G13420.1	3702.AT1G21750.1	0	0	0	0	0.306	0.243	0	0.178	0.53
SWEET8	FAR2	139525	127798	3702.AT5G40260.1	3702.AT3G11980.1	0	0	0	0	0.375	0	0	0.272	0.525
HSP21	GLN1.3	134846	128461	3702.AT4G27670.1	3702.AT3G17820.1	0	0	0	0	0	0.488	0	0.097	0.517
MGE1	TXR1	141176	131608	3702.AT5G55200.1	3702.AT3G59280.1	0	0	0	0	0.215	0.043	0	0.406	0.515
IDH2	mMDH1	123323	119664	3702.AT2G17130.1	3702.AT1G53240.1	0.132	0	0	0	0.152	0.127	0	0.319	0.503
PGI1	AT2G20420	134515	123662	3702.AT4G24620.1	3702.AT2G20420.1	0.043	0	0	0	0.295	0	0	0.319	0.5
CDC48	Hsp70b	127559	116919	3702.AT3G09840.1	3702.AT1G16030.1	0.106	0	0	0	0	0.106	0	0.416	0.492
TRA2	mMDH1	137428	119664	3702.AT5G13420.1	3702.AT1G53240.1	0.058	0	0	0	0.135	0.089	0	0.395	0.491
CPN20	HSP101	138200	121703	3702.AT5G20720.1	3702.AT1G74310.1	0.064	0	0	0	0.23	0.042	0	0.343	0.486
SGT1A	HSFA7A	134402	130836	3702.AT4G23570.3	3702.AT3G51910.1	0	0	0	0	0.408	0.092	0	0.118	0.484
RBCS1B	CDC48	139336	127559	3702.AT5G38430.1	3702.AT3G09840.1	0.454	0	0	0	0	0	0	0.092	0.483
UBA2	SIR	136771	136574	3702.AT5G06460.1	3702.AT5G04590.1	0.387	0	0	0	0.141	0	0	0.068	0.466
HSP21	ROF1	134846	129276	3702.AT4G27670.1	3702.AT3G25230.2	0	0	0	0	0.177	0	0	0.375	0.464
SGT1A	Hsp70b	134402	116919	3702.AT4G23570.3	3702.AT1G16030.1	0	0	0	0	0.436	0.044	0	0.074	0.457
TPR10	AT2G20420	127042	123662	3702.AT3G04710.3	3702.AT2G20420.1	0.108	0	0	0	0.063	0	0	0.398	0.453
MGE1	mMDH1	141176	119664	3702.AT5G55200.1	3702.AT1G53240.1	0.043	0	0	0	0.175	0.102	0	0.319	0.452
AT5G42740	AT2G20420	139798	123662	3702.AT5G42740.1	3702.AT2G20420.1	0.043	0	0	0	0.225	0	0	0.319	0.45
ELF9	PRP39	137719	115626	3702.AT5G16260.1	3702.AT1G04080.3	0	0	0	0	0.256	0	0	0.288	0.448
CPN20	mMDH1	138200	119664	3702.AT5G20720.1	3702.AT1G53240.1	0	0	0	0	0.219	0.045	0	0.319	0.448
HCC1	PDIL1-1	127468	117499	3702.AT3G08950.1	3702.AT1G21750.1	0	0	0	0	0	0.408	0	0.098	0.443
HSP21	SGT1A	134846	134402	3702.AT4G27670.1	3702.AT4G23570.3	0	0	0	0	0.438	0	0	0	0.439
HCC1	TPR10	127468	127042	3702.AT3G08950.1	3702.AT3G04710.3	0.127	0	0	0	0.1	0	0	0.34	0.436
QS	AT1G77670	140631	122042	3702.AT5G50210.1	3702.AT1G77670.1	0	0	0	0	0.045	0	0.419	0.058	0.431
RBCS1B	LHB1B1	139336	125159	3702.AT5G38430.1	3702.AT2G34430.1	0	0	0	0	0.073	0	0	0.406	0.426
RSW3	HSP70	142090	127860	3702.AT5G63840.1	3702.AT3G12580.1	0	0	0	0	0	0.105	0	0.384	0.425
mMDH1	PDIL1-1	119664	117499	3702.AT1G53240.1	3702.AT1G21750.1	0.096	0	0	0	0	0.046	0	0.38	0.419
CPN20	AT3G53740	138200	131035	3702.AT5G20720.1	3702.AT3G53740.2	0	0	0	0	0.363	0	0	0.12	0.415
TRA2	AT2G45300	137428	126329	3702.AT5G13420.1	3702.AT2G45300.1	0.044	0	0	0	0.093	0.079	0	0.354	0.415
AT1G70770	PDIL1-1	121340	117499	3702.AT1G70770.1	3702.AT1G21750.1	0	0	0	0	0.415	0	0	0	0.414
GLN1.3	PDIL1-1	128461	117499	3702.AT3G17820.1	3702.AT1G21750.1	0	0	0	0	0.17	0	0	0.319	0.411
RSW3	Hsp70b	142090	116919	3702.AT5G63840.1	3702.AT1G16030.1	0	0	0	0	0	0.105	0	0.367	0.409
AT2G38550	AKR2B	125603	123350	3702.AT2G38550.1	3702.AT2G17390.1	0	0	0	0	0	0	0	0.409	0.408
GLN1.3	mMDH1	128461	119664	3702.AT3G17820.1	3702.AT1G53240.1	0	0	0	0	0	0	0	0.403	0.403
CPN20	HSP21	138200	134846	3702.AT5G20720.1	3702.AT4G27670.1	0	0	0	0	0.091	0	0	0.37	0.402

## Sheet: 32DEPs
#node1	node2	node1_string_internal_id	node2_string_internal_id	node1_external_id	node2_external_id	neighborhood_on_chromosome	gene_fusion	phylogenetic_cooccurrence	homology	coexpression	experimentally_determined_interaction	database_annotated	automated_textmining	combined_score
AT1G64880	emb2394	120716	115745	3702.AT1G64880.1	3702.AT1G05190.1	0.454	0	0.285	0	0.986	0.664	0.419	0.319	0.999
LTP12	ATA20	130800	128197	3702.AT3G51590.1	3702.AT3G15400.1	0	0	0	0	0.449	0	0	0.674	0.812
LTP12	AT1G06260	130800	115866	3702.AT3G51590.1	3702.AT1G06260.1	0	0	0	0	0.492	0	0	0.559	0.766
ATA20	AT1G06260	128197	115866	3702.AT3G15400.1	3702.AT1G06260.1	0	0	0	0	0.432	0	0	0.592	0.758
CYP86C2	AT2G34810	129373	125198	3702.AT3G26125.1	3702.AT2G34810.1	0	0	0	0	0	0	0.174	0.683	0.727
CORI3	AT2G34810	134405	125198	3702.AT4G23600.1	3702.AT2G34810.1	0.066	0	0	0	0.375	0.042	0.525	0.095	0.715
ATA20	AT1G20120	128197	117328	3702.AT3G15400.1	3702.AT1G20120.1	0	0	0	0	0.437	0	0	0.447	0.675
LTP12	AT1G20120	130800	117328	3702.AT3G51590.1	3702.AT1G20120.1	0	0	0	0	0.43	0	0	0.45	0.673
QRT3	ATA20	134024	128197	3702.AT4G20050.1	3702.AT3G15400.1	0	0	0	0	0.436	0	0	0.404	0.649
QRT3	LTP12	134024	130800	3702.AT4G20050.1	3702.AT3G51590.1	0	0	0	0	0.344	0	0	0.409	0.596
LTP12	CYP86C2	130800	129373	3702.AT3G51590.1	3702.AT3G26125.1	0	0	0	0	0.333	0	0	0.38	0.568
QRT3	AT1G06260	134024	115866	3702.AT4G20050.1	3702.AT1G06260.1	0	0	0	0	0.429	0	0	0.27	0.565
SSL2	AT2G34810	125904	125198	3702.AT2G41290.1	3702.AT2G34810.1	0	0	0	0	0.073	0	0.523	0.045	0.54
LTP12	AT2G34810	130800	125198	3702.AT3G51590.1	3702.AT2G34810.1	0	0	0	0	0	0	0	0.495	0.495
XTH3	AT1G06260	129255	115866	3702.AT3G25050.1	3702.AT1G06260.1	0	0	0	0	0.485	0	0	0	0.485
AT4G16190	AT3G51000	133592	130739	3702.AT4G16190.1	3702.AT3G51000.1	0	0	0	0	0.275	0	0	0.306	0.475
CYP86C2	AT1G06260	129373	115866	3702.AT3G26125.1	3702.AT1G06260.1	0	0	0	0	0.449	0	0	0.056	0.457
AT1G20130	AT1G06260	117329	115866	3702.AT1G20130.1	3702.AT1G06260.1	0	0	0	0	0.447	0	0	0	0.447
AT3G51000	AT1G06260	130739	115866	3702.AT3G51000.1	3702.AT1G06260.1	0	0	0	0	0	0	0	0.446	0.446
AT3G52130	AT1G20130	130861	117329	3702.AT3G52130.1	3702.AT1G20130.1	0	0	0	0	0.435	0	0	0.058	0.445
AT3G52130	AT1G20132	130861	117330	3702.AT3G52130.1	3702.AT1G20132.1	0	0	0	0	0.435	0	0	0.058	0.445
AT1G20132	AT1G20120	117330	117328	3702.AT1G20132.1	3702.AT1G20120.1	0	0	0	0.959	0.438	0	0	0	0.438
QRT3	CYP86C2	134024	129373	3702.AT4G20050.1	3702.AT3G26125.1	0	0	0	0	0.438	0	0	0	0.438
AT1G20132	AT1G20130	117330	117329	3702.AT1G20132.1	3702.AT1G20130.1	0	0	0	0.956	0.438	0	0	0	0.438
ATA20	AT1G20130	128197	117329	3702.AT3G15400.1	3702.AT1G20130.1	0	0	0	0	0.438	0	0	0	0.438
LTP12	AT1G20132	130800	117330	3702.AT3G51590.1	3702.AT1G20132.1	0	0	0	0	0.438	0	0	0	0.438
ATA20	AT1G20132	128197	117330	3702.AT3G15400.1	3702.AT1G20132.1	0	0	0	0	0.438	0	0	0	0.438
AT1G20132	AT1G06260	117330	115866	3702.AT1G20132.1	3702.AT1G06260.1	0	0	0	0	0.437	0	0	0	0.437
CYP86C2	AT1G20120	129373	117328	3702.AT3G26125.1	3702.AT1G20120.1	0	0	0	0	0.437	0	0	0	0.437
CYP86C2	ATA20	129373	128197	3702.AT3G26125.1	3702.AT3G15400.1	0	0	0	0	0.436	0	0	0	0.436
QRT3	AT1G20120	134024	117328	3702.AT4G20050.1	3702.AT1G20120.1	0	0	0	0	0.436	0	0	0	0.436
QRT3	AT1G20132	134024	117330	3702.AT4G20050.1	3702.AT1G20132.1	0	0	0	0	0.436	0	0	0	0.436
AT5G17340	AT3G52130	137836	130861	3702.AT5G17340.1	3702.AT3G52130.1	0	0	0	0	0.436	0	0	0	0.436
AT3G52130	LTP12	130861	130800	3702.AT3G52130.1	3702.AT3G51590.1	0	0	0	0	0.435	0	0	0	0.435
AT1G20130	AT1G20120	117329	117328	3702.AT1G20130.1	3702.AT1G20120.1	0	0	0	0.937	0.435	0	0	0	0.435
XTH3	ATA20	129255	128197	3702.AT3G25050.1	3702.AT3G15400.1	0	0	0	0	0.432	0	0	0	0.432
AT3G21970	AT3G21910	128913	128906	3702.AT3G21970.1	3702.AT3G21910.1	0	0	0	0.916	0.429	0	0	0	0.429
CYP86C2	AT1G20132	129373	117330	3702.AT3G26125.1	3702.AT1G20132.1	0	0	0	0	0.425	0	0	0	0.425
AT1G20120	AT1G06260	117328	115866	3702.AT1G20120.1	3702.AT1G06260.1	0	0	0	0	0.424	0	0	0	0.424
AT3G52130	ATA20	130861	128197	3702.AT3G52130.1	3702.AT3G15400.1	0	0	0	0	0.422	0	0	0	0.422
AT4G16190	ATA20	133592	128197	3702.AT4G16190.1	3702.AT3G15400.1	0	0	0	0	0	0	0	0.421	0.42
AT4G16190	LTP12	133592	130800	3702.AT4G16190.1	3702.AT3G51590.1	0	0	0	0	0	0	0	0.421	0.42
AT3G21970	AT1G20135	128913	117331	3702.AT3G21970.1	3702.AT1G20135.1	0	0	0	0	0.409	0	0	0	0.409
QRT3	AT1G20130	134024	117329	3702.AT4G20050.1	3702.AT1G20130.1	0	0	0	0	0.405	0	0	0	0.405
LTP12	AT1G20130	130800	117329	3702.AT3G51590.1	3702.AT1G20130.1	0	0	0	0	0.4	0	0	0	0.4
